# Supplementary material for: An in vivo reporter for tracking lipid droplet dynamics in transparent zebrafish
Source: eLife. 2021 Jun 11;10:e64744. doi: 10.7554/eLife.64744 (PMC8195600; doi:10.7554/eLife.64744)
Supplement: Figure 2—figure supplement 1—source data 1. [file elife-64744-fig2-figsupp1-data1.xlsx]

## Sheet: BODIPY
Date imaged	Reference Image File	Timepoint	Condition	APPSAT	TSAT	CSAT	NVAT	VAT
41521	22153	14 dpf	Control	0	0	0	0	0
41521	22159	14 dpf	Control	0	0	1	0	1
41521	22165	14 dpf	Control	0	0	0	0	1
41521	22171	14 dpf	Control	0	0	0	0	1
41521	22174	14 dpf	Control	0	0	0	0	0
41521	22183	14 dpf	Control	0	0	0	0	0
41521	22186	14 dpf	Control	0	0	0	0	0			Scoring:
41721	22698	14 dpf	Control	0	0	0	0	1			Present	1
41721	22741	14 dpf	Control	0	0	0	0	0			Not present	0
41721	22747	14 dpf	Control	0	0	0	0	1
41721	22750	14 dpf	Control	0	0	0	0	1
41721	22753	14 dpf	Control	0	0	0	0	1
41721	22774	14 dpf	Control	0	0	0	0	0
041521_2	22386	14 dpf	Control	0	0	1	0	1
041521_2	22389	14 dpf	Control	0	0	0	0	0
041521_2	22392	14 dpf	Control	0	0	1	0	1
041521_2	22395	14 dpf	Control	0	0	0	0	0
041521_2	22398	14 dpf	Control	0	0	0	0	0
041521_2	22401	14 dpf	Control	0	0	0	0	1
041521_2	22404	14 dpf	Control	0	0	1	0	1
041521_2	22407	14 dpf	Control	0	0	0	0	1
041521_2	22422	14 dpf	Control	0	0	0	0	0
041521_2	22431	14 dpf	Control	0	0	0	0	0
041521_3	22446	14 dpf	Control	0	0	1	0	1
041521_3	22449	14 dpf	Control	0	0	1	0	0
041521_3	22452	14 dpf	Control	0	0	0	0	1
041521_3	22459	14 dpf	Control	0	0	1	0	1
041521_3	22462	14 dpf	Control	0	0	0	0	1
041521_3	22465	14 dpf	Control	0	0	1	0	1
041521_3	22475	14 dpf	Control	0	0	1	0	1
041521_3	22478	14 dpf	Control	0	0	0	0	0
041521_3	22481	14 dpf	Control	0	0	0	0	1
41521	22128	14 dpf	Plin2	0	0	0	0	1
41521	22131	14 dpf	Plin2	0	0	0	0	0
41521	22138	14 dpf	Plin2	0	0	0	0	0
41521	22141	14 dpf	Plin2	0	0	1	0	1
41521	22144	14 dpf	Plin2	0	0	0	0	0
41521	22147	14 dpf	Plin2	0	0	1	0	1
41521	22150	14 dpf	Plin2	0	0	0	0	1
41521	22156	14 dpf	Plin2	0	0	0	0	0
41521	22162	14 dpf	Plin2	0	0	0	0	1
41521	22168	14 dpf	Plin2	0	0	0	0	1
41521	22177	14 dpf	Plin2	0	0	0	0	1
41521	22180	14 dpf	Plin2	0	0	0	0	0
41721	22701	14 dpf	Plin2	0	0	0	0	1
41721	22704	14 dpf	Plin2	0	0	0	0	1
41721	22708	14 dpf	Plin2	0	0	0	0	0
41721	22711	14 dpf	Plin2	0	0	0	0	1
41721	22714	14 dpf	Plin2	0	0	0	0	1
41721	22717	14 dpf	Plin2	0	0	0	0	1
41721	22720	14 dpf	Plin2	0	0	0	0	0
41721	22723	14 dpf	Plin2	0	0	0	0	1
41721	22726	14 dpf	Plin2	0	0	0	0	0
41721	22729	14 dpf	Plin2	0	0	0	0	1
41721	22732	14 dpf	Plin2	0	0	0	0	1
41721	22735	14 dpf	Plin2	0	0	0	0	0
41721	22738	14 dpf	Plin2	0	0	0	0	1
41721	22744	14 dpf	Plin2	0	0	0	0	1
41721	22756	14 dpf	Plin2	0	0	0	0	1
41721	22759	14 dpf	Plin2	0	0	0	0	0
41721	22762	14 dpf	Plin2	0	0	0	0	1
41721	22765	14 dpf	Plin2	0	0	0	0	0
41721	22768	14 dpf	Plin2	0	0	0	0	1
41721	22771	14 dpf	Plin2	0	0	0	0	1
041521_2	22380	14 dpf	Plin2	0	0	0	0	0
041521_2	22383	14 dpf	Plin2	0	0	0	0	1
041521_2	22410	14 dpf	Plin2	0	0	1	0	0
041521_2	22413	14 dpf	Plin2	0	0	1	0	1
041521_2	22416	14 dpf	Plin2	0	0	0	0	1
041521_2	22419	14 dpf	Plin2	0	0	0	0	1
041521_2	22425	14 dpf	Plin2	0	0	1	0	1
041521_2	22428	14 dpf	Plin2	0	0	1	0	1
041521_2	22434	14 dpf	Plin2	0	0	0	0	1
041521_3	22437	14 dpf	plin2	0	0	1	0	1
041521_3	22440	14 dpf	plin2	0	0	0	0	1
041521_3	22443	14 dpf	plin2	0	0	0	0	0
041521_3	22455	14 dpf	plin2	0	0	1	0	1
041521_3	22468	14 dpf	plin2	0	0	1	0	1
041521_3	22472	14 dpf	plin2	0	0	0	0	0
041521_3	22484	14 dpf	plin2	0	0	0	0	1
40121	20922	21 dpf	Control	0	0	0	0	1
40121	20925	21 dpf	Control	0	0	0	0	0
40121	20928	21 dpf	Control	0	0	1	0	1
40121	20931	21 dpf	Control	0	0	1	0	1
40121	20934	21 dpf	Control	0	0	1	0	1
40121	20940	21 dpf	Control	0	0	0	0	0
40121	20943	21 dpf	Control	0	0	1	0	1
40121	20952	21 dpf	Control	0	0	1	0	1
40121	20955	21 dpf	Control	0	0	0	0	1
40121	20965	21 dpf	Control	0	0	0	0	1
40521	21059	21 dpf	Control	0	0	0	0	1
40521	21062	21 dpf	Control	0	0	1	0	1
40521	21071	21 dpf	Control	0	0	1	0	1
40521	21074	21 dpf	Control	0	0	1	0	1
40521	21077	21 dpf	Control	0	0	1	0	1
40521	21089	21 dpf	Control	0	0	1	0	1
40521	21092	21 dpf	Control	0	0	1	0	1
40521	21098	21 dpf	Control	0	0	0	0	1
40521	21101	21 dpf	Control	0	0	0	0	1
40521	21110	21 dpf	Control	0	0	0	0	0
42221	23294	21 dpf	Control	0	0	1	0	1
42221	23297	21 dpf	Control	0	0	1	0	1
42221	23312	21 dpf	Control	0	0	1	0	1
42221	2331	21 dpf	Control	0	0	1	0	1
42221	23321	21 dpf	Control	0	0	1	0	1
42221	23324	21 dpf	Control	0	0	1	0	1
42221	23339	21 dpf	Control	0	0	1	0	1
42221	23363	21 dpf	Control	0	0	1	0	1
42221	23366	21 dpf	Control	0	0	1	0	1
42221	23369	21 dpf	Control	0	0	1	0	1
40121	20916	21 dpf	Plin2	0	0	1	0	1
40121	20919	21 dpf	Plin2	0	0	0	0	0
40121	20937	21 dpf	Plin2	0	0	1	0	1
40121	20946	21 dpf	Plin2	0	0	1	0	1
40121	20949	21 dpf	Plin2	0	0	0	0	1
40121	20959	21 dpf	Plin2	0	0	0	0	1
40121	20962	21 dpf	Plin2	0	0	0	0	1
40121	20968	21 dpf	Plin2	0	0	0	0	1
40521	21055	21 dpf	Plin2	0	0	1	0	1
40521	21065	21 dpf	Plin2	0	0	1	0	1
40521	21068	21 dpf	Plin2	0	0	1	0	1
40521	21080	21 dpf	Plin2	0	0	1	0	1
40521	21083	21 dpf	Plin2	0	0	1	0	1
40521	21086	21 dpf	Plin2	0	0	1	0	1
40521	21095	21 dpf	Plin2	0	0	1	0	1
40521	21104	21 dpf	Plin2	0	0	1	0	1
40521	21107	21 dpf	Plin2	0	0	0	0	0
40521	21113	21 dpf	Plin2	0	0	1	0	1
40521	21116	21 dpf	Plin2	0	0	0	0	1
42221	23283	21 dpf	Plin2	0	0	1	0	0
42221	23286	21 dpf	Plin2	0	1	1	0	1
42221	23289	21 dpf	Plin2	0	0	1	0	1
42221	23292	21 dpf	Plin2	0	0	1	0	1
42221	23301	21 dpf	Plin2	0	0	1	0	1
42221	23304	21 dpf	Plin2	0	0	1	0	1
42221	23307	21 dpf	Plin2	0	0	1	0	1
42221	23310	21 dpf	Plin2	0	0	1	0	1
42221	23319	21 dpf	Plin2	0	0	1	0	1
42221	23328	21 dpf	Plin2	0	0	0	0	0
42221	23331	21 dpf	Plin2	0	0	1	0	1
42221	23334	21 dpf	Plin2	0	0	1	0	1
42221	23337	21 dpf	Plin2	0	0	1	0	1
42221	23343	21 dpf	Plin2	0	0	1	0	1
42221	23346	21 dpf	Plin2	0	0	1	0	1
42221	23349	21 dpf	Plin2	0	0	0	0	1
42221	23352	21 dpf	Plin2	0	0	1	0	1
42221	23355	21 dpf	Plin2	0	0	1	0	1
42221	23358	21 dpf	Plin2	0	0	1	0	1
42221	23361	21 dpf	Plin2	0	0	1	0	1
42221	23373	21 dpf	Plin2	0	0	1	0	1
41621	22505	42 dpf	Control	1	1	1	1	1
41621	22508	42 dpf	Control	1	1	1	1	1
41621	22511	42 dpf	Control	1	1	1	1	1
41621	22514	42 dpf	Control	1	1	1	1	1
41621	22520	42 dpf	Control	1	1	1	1	1
41621	22523	42 dpf	Control	1	1	1	1	1
41621	22526	42 dpf	Control	1	1	1	1	1
41621	22538	42 dpf	Control	1	1	1	1	1
41621	22541	42 dpf	Control	1	1	1	1	1
41621	22544	42 dpf	Control	1	1	1	1	1
41621	22547	42 dpf	Control	1	1	1	1	1
41621	22556	42 dpf	Control	1	1	1	1	1
41621	22559	42 dpf	Control	1	1	1	1	1
41621	22578	42 dpf	Control	1	1	1	1	1
41621	22581	42 dpf	Control	1	1	1	1	1
041621_2	22590	42 dpf	Control	1	1	1	1	1
041621_2	22593	42 dpf	Control	1	1	1	1	1
041621_2	22599	42 dpf	Control	1	1	1	1	1
041621_2	22608	42 dpf	Control	1	1	1	1	1
041621_2	22611	42 dpf	Control	1	1	1	1	1
041621_2	22614	42 dpf	Control	1	1	1	1	1
041621_2	22617	42 dpf	Control	1	1	1	1	1
041621_2	22626	42 dpf	Control	1	1	1	1	1
041621_2	22632	42 dpf	Control	1	1	1	1	1
041621_2	22638	42 dpf	Control	1	1	1	1	1
041621_2	22647	42 dpf	Control	0	1	1	0	1
041621_2	22650	42 dpf	Control	1	1	1	1	1
041621_2	22653	42 dpf	Control	1	1	1	1	1
041621_2	22659	42 dpf	Control	0	1	1	1	1
041621_2	22671	42 dpf	Control	1	1	1	1	1
041621_2	22674	42 dpf	Control	1	1	1	1	1
041621_2	22680	42 dpf	Control	1	1	1	1	1
041621_2	22686	42 dpf	Control	1	1	1	1	1
041621_2	22692	42 dpf	Control	1	1	1	1	1
42121	23019	42 dpf	Control	1	1	1	1	1
42121	23022	42 dpf	Control	1	1	1	1	1
42121	23031	42 dpf	Control	1	1	1	1	1
42121	23034	42 dpf	Control	1	1	1	1	1
42121	23037	42 dpf	Control	1	1	1	1	1
42121	23040	42 dpf	Control	1	1	1	1	1
42121	23046	42 dpf	Control	1	1	1	1	1
42121	23055	42 dpf	Control	1	1	1	1	1
42121	23058	42 dpf	Control	1	1	1	1	1
42121	23061	42 dpf	Control	1	1	1	1	1
42121	23070	42 dpf	Control	1	1	1	1	1
42121	23073	42 dpf	Control	1	1	1	1	1
42121	23076	42 dpf	Control	1	1	1	1	1
42121	23085	42 dpf	Control	1	1	1	1	1
41621	22487	42 dpf	Plin2	1	1	1	1	1
41621	22490	42 dpf	Plin2	1	1	1	1	1
41621	22493	42 dpf	Plin2	1	1	1	1	1
41621	22496	42 dpf	Plin2	1	1	1	1	1
41621	22499	42 dpf	Plin2	1	1	1	1	1
41621	22502	42 dpf	Plin2	1	1	1	1	1
41621	22517	42 dpf	Plin2	1	1	1	1	1
41621	22529	42 dpf	Plin2	0	0	0	0	1
41621	22532	42 dpf	Plin2	0	1	1	1	1
41621	22535	42 dpf	Plin2	1	1	1	1	1
41621	22550	42 dpf	Plin2	1	1	1	1	1
41621	22553	42 dpf	Plin2	1	1	1	1	1
41621	22562	42 dpf	Plin2	1	1	1	1	1
41621	22566	42 dpf	Plin2	1	1	1	1	1
41621	22569	42 dpf	Plin2	1	1	1	1	1
41621	22572	42 dpf	Plin2	1	1	1	1	1
41621	22575	42 dpf	Plin2	1	1	1	1	1
41621	22584	42 dpf	Plin2	1	1	1	1	1
041621_2	22602	42 dpf	Plin2	1	1	1	1	1
041621_2	22620	42 dpf	Plin2	1	1	1	1	1
041621_2	22623	42 dpf	Plin2	1	1	1	1	1
041621_2	22629	42 dpf	Plin2	1	1	1	1	1
041621_2	22635	42 dpf	Plin2	1	1	1	1	1
041621_2	22641	42 dpf	Plin2	1	1	1	1	1
041621_2	22644	42 dpf	Plin2	1	1	1	1	1
041621_2	22656	42 dpf	Plin2	1	1	1	1	1
041621_2	22662	42 dpf	Plin2	1	1	1	1	1
041621_2	22665	42 dpf	Plin2	1	1	1	1	1
041621_2	22668	42 dpf	Plin2	1	1	1	1	1
041621_2	22677	42 dpf	Plin2	1	1	1	1	1
041621_2	22683	42 dpf	Plin2	1	1	1	1	1
041621_2	22689	42 dpf	Plin2	1	1	1	1	1
041621_2	22695	42 dpf	Plin2	1	1	1	1	1
42121	23016	42 dpf	Plin2	1	1	1	1	1
42121	23025	42 dpf	Plin2	1	1	1	1	1
42121	23028	42 dpf	Plin2	1	1	1	1	1
42121	23043	42 dpf	Plin2	1	1	1	1	1
42121	23049	42 dpf	Plin2	1	1	1	1	1
42121	23052	42 dpf	Plin2	1	1	1	1	1
42121	23064	42 dpf	Plin2	1	1	1	1	1
42121	23067	42 dpf	Plin2	1	1	1	1	1
42121	23079	42 dpf	Plin2	1	1	1	1	1
42121	23082	42 dpf	Plin2	1	1	1	1	1
40621	21284	5 dpf	Control	0	0	0	0	0
40621	21287	5 dpf	Control	0	0	0	0	0
40621	21290	5 dpf	Control	0	0	0	0	0
40621	21293	5 dpf	Control	0	0	0	0	0
40621	21296	5 dpf	Control	0	0	0	0	0
40621	21299	5 dpf	Control	0	0	0	0	0
40621	21302	5 dpf	Control	0	0	0	0	0
40621	21305	5 dpf	Control	0	0	0	0	0
40621	21308	5 dpf	Control	0	0	0	0	0
40621	21317	5 dpf	Control	0	0	0	0	0
40621	21323	5 dpf	Control	0	0	0	0	0
40621	21329	5 dpf	Control	0	0	0	0	0
40621	21332	5 dpf	Control	0	0	0	0	0
40621	21342	5 dpf	Control	0	0	0	0	0
40821	21610	5 dpf	Control	0	0	0	0	0
40821	21613	5 dpf	Control	0	0	0	0	0
40821	21619	5 dpf	Control	0	0	0	0	0
40821	21625	5 dpf	Control	0	0	0	0	0
40821	21632	5 dpf	Control	0	0	0	0	0
40821	21641	5 dpf	Control	0	0	0	0	0
40821	21647	5 dpf	Control	0	0	0	0	0
40821	21654	5 dpf	Control	0	0	0	0	0
40821	21657	5 dpf	Control	0	0	0	0	0
040821_2	21801	5 dpf	Control	0	0	0	0	0
040821_2	21810	5 dpf	Control	0	0	0	0	0
040821_2	21813	5 dpf	Control	0	0	0	0	0
040821_2	21831	5 dpf	Control	0	0	0	0	0
040821_2	21846	5 dpf	Control	0	0	0	0	0
040821_2	21855	5 dpf	Control	0	0	0	0	0
040821_2	21861	5 dpf	Control	0	0	0	0	0
040821_2	21864	5 dpf	Control	0	0	0	0	0
040821_2	21876	5 dpf	Control	0	0	0	0	0
40621	21311	5 dpf	Plin2	0	0	0	0	0
40621	21314	5 dpf	Plin2	0	0	0	0	0
40621	21320	5 dpf	Plin2	0	0	0	0	0
40621	21326	5 dpf	Plin2	0	0	0	0	0
40621	21336	5 dpf	Plin2	0	0	0	0	0
40621	21339	5 dpf	Plin2	0	0	0	0	0
40621	21345	5 dpf	Plin2	0	0	0	0	0
40621	21348	5 dpf	Plin2	0	0	0	0	0
40821	21598	5 dpf	Plin2	0	0	0	0	0
40821	21604	5 dpf	Plin2	0	0	0	0	0
40821	21607	5 dpf	Plin2	0	0	0	0	0
40821	21616	5 dpf	Plin2	0	0	0	0	0
40821	21622	5 dpf	Plin2	0	0	0	0	0
40821	21629	5 dpf	Plin2	0	0	0	0	0
40821	21635	5 dpf	Plin2	0	0	0	0	0
40821	21638	5 dpf	Plin2	0	0	0	0	0
40821	21644	5 dpf	Plin2	0	0	0	0	0
40821	21651	5 dpf	Plin2	0	0	0	0	0
040821_2	21789	5 dpf	Plin2	0	0	0	0	0
040821_2	21792	5 dpf	Plin2	0	0	0	0	0
040821_2	21795	5 dpf	Plin2	0	0	0	0	0
040821_2	21798	5 dpf	Plin2	0	0	0	0	0
040821_2	21804	5 dpf	Plin2	0	0	0	0	0
040821_2	21807	5 dpf	Plin2	0	0	0	0	0
040821_2	21816	5 dpf	Plin2	0	0	0	0	0
040821_2	21819	5 dpf	Plin2	0	0	0	0	0
040821_2	21822	5 dpf	Plin2	0	0	0	0	0
040821_2	21825	5 dpf	Plin2	0	0	0	0	0
040821_2	21828	5 dpf	Plin2	0	0	0	0	0
040821_2	21834	5 dpf	Plin2	0	0	0	0	0
040821_2	21837	5 dpf	Plin2	0	0	0	0	0
040821_2	21840	5 dpf	Plin2	0	0	0	0	0
040821_2	21843	5 dpf	Plin2	0	0	0	0	0
040821_2	21849	5 dpf	Plin2	0	0	0	0	0
040821_2	21852	5 dpf	Plin2	0	0	0	0	0
040821_2	21858	5 dpf	Plin2	0	0	0	0	0
040821_2	21867	5 dpf	Plin2	0	0	0	0	0
040821_2	21873	5 dpf	Plin2	0	0	0	0	0
40521	21119	Adult	Control	1	1	1	1	1
40521	21131	Adult	Control	1	1	1	1	1
40521	21134	Adult	Control	1	1	1	1	1
40521	21143	Adult	Control	1	1	1	1	1
40521	21146	Adult	Control	1	1	1	1	1
40521	21149	Adult	Control	1	1	1	1	1
40521	21152	Adult	Control	1	1	1	1	1
40521	21161	Adult	Control	1	1	1	1	1
40721	21503	Adult	Control	1	1	1	1	1
40721	21506	Adult	Control	1	1	1	1	1
40721	21513	Adult	Control	1	1	1	1	1
40721	21516	Adult	Control	1	1	1	1	1
40721	21523	Adult	Control	1	1	1	0	1
40721	21526	Adult	Control	1	1	1	1	1
40721	21538	Adult	Control	1	1	1	1	1
40721	21544	Adult	Control	1	1	1	1	1
40721	21547	Adult	Control	1	1	1	1	1
041321_1	22092	Adult	Control	1	1	1	1	1
041321_1	22095	Adult	Control	1	1	1	1	1
041321_1	22098	Adult	Control	1	1	1	1	1
041321_1	22101	Adult	Control	1	1	1	1	1
041321_1	22107	Adult	Control	1	1	1	1	1
041321_1	22116	Adult	Control	1	1	1	1	1
041321_1	22125	Adult	Control	1	1	1	1	1
041321_2	22053	Adult	Control	1	1	1	1	1
041321_2	22056	Adult	Control	1	1	1	1	1
041321_2	22059	Adult	Control	1	1	1	1	1
041321_2	22062	Adult	Control	1	1	1	1	1
041321_2	22065	Adult	Control	1	1	1	1	1
041321_2	22074	Adult	Control	1	1	1	1	1
041321_2	22080	Adult	Control	1	1	1	1	1
041321_2	22089	Adult	Control	1	1	1	1	1
42221	23375	Adult	Control	1	1	1	1	1
42221	23384	Adult	Control	1	1	1	1	1
42221	23387	Adult	Control	1	1	1	1	1
42221	23390	Adult	Control	1	1	1	1	1
42221	23393	Adult	Control	1	1	1	1	1
42221	23396	Adult	Control	1	1	1	1	1
40521	21122	Adult	Plin2	1	1	1	1	1
40521	21125	Adult	Plin2	1	1	1	1	1
40521	21128	Adult	Plin2	1	1	1	1	1
40521	21137	Adult	Plin2	1	1	1	1	1
40521	21140	Adult	Plin2	1	1	1	1	1
40521	21155	Adult	Plin2	1	1	1	1	1
40521	21158	Adult	Plin2	1	1	1	1	1
40521	21164	Adult	Plin2	1	1	1	0	1
40721	21497	Adult	Plin2	1	1	1	1	1
40721	21500	Adult	Plin2	1	1	1	1	1
40721	21509	Adult	Plin2	1	1	1	1	1
40721	21520	Adult	Plin2	1	1	1	1	1
40721	21529	Adult	Plin2	1	1	1	1	1
40721	21532	Adult	Plin2	1	1	1	1	1
40721	21535	Adult	Plin2	1	1	1	1	1
40721	21541	Adult	Plin2	1	1	1	1	1
041321_1	22104	Adult	Plin2	1	1	1	1	1
041321_1	22110	Adult	Plin2	1	1	1	1	1
041321_1	22113	Adult	Plin2	1	1	1	1	1
041321_1	22119	Adult	Plin2	1	1	1	1	1
041321_1	22122	Adult	Plin2	1	1	1	1	1
041321_2	22050	Adult	Plin2	1	1	1	1	1
041321_2	22068	Adult	Plin2	1	1	1	1	1
041321_2	22071	Adult	Plin2	1	1	1	1	1
041321_2	22077	Adult	Plin2	1	1	1	1	1
041321_2	22083	Adult	Plin2	1	1	1	1	1
041321_2	22086	Adult	Plin2	1	0	1	0	0
42221	23378	Adult	Plin2	1	1	1	1	1
42221	23381	Adult	Plin2	1	1	1	1	1

## Sheet: tdTOMATO
Date imaged	Reference Image File	Timepoint	Condition	APPSAT	TSAT	CSAT	NVAT	VAT
41521	22128	14 dpf	Plin2	0	0	0	0	1
41521	22131	14 dpf	Plin2	0	0	0	0	0
41521	22138	14 dpf	Plin2	0	0	0	0	0
41521	22141	14 dpf	Plin2	0	0	1	0	1
41521	22144	14 dpf	Plin2	0	0	0	0	0
41521	22147	14 dpf	Plin2	0	0	0	0	1
41521	22150	14 dpf	Plin2	0	0	0	0	1
41521	22156	14 dpf	Plin2	0	0	0	0	0
41521	22162	14 dpf	Plin2	0	0	0	0	0
41521	22168	14 dpf	Plin2	0	0	0	0	1
41521	22177	14 dpf	Plin2	0	0	0	0	1
41521	22180	14 dpf	Plin2	0	0	0	0	0
41721	22701	14 dpf	Plin2	0	0	0	0	1
41721	22704	14 dpf	Plin2	0	0	0	0	1
41721	22708	14 dpf	Plin2	0	0	0	0	0
41721	22711	14 dpf	Plin2	0	0	1	0	1
41721	22714	14 dpf	Plin2	0	0	0	0	1
41721	22717	14 dpf	Plin2	0	0	0	0	0
41721	22720	14 dpf	Plin2	0	0	0	0	0
41721	22723	14 dpf	Plin2	0	0	0	0	0
41721	22726	14 dpf	Plin2	0	0	0	0	1
41721	22729	14 dpf	Plin2	0	0	0	0	1
41721	22732	14 dpf	Plin2	0	0	0	0	1
41721	22735	14 dpf	Plin2	0	0	0	0	1
41721	22738	14 dpf	Plin2	0	0	0	0	0
41721	22744	14 dpf	Plin2	0	0	0	0	1
41721	22756	14 dpf	Plin2	0	0	0	0	0
41721	22759	14 dpf	Plin2	0	0	0	0	1
41721	22762	14 dpf	Plin2	0	0	0	0	1
41721	22765	14 dpf	Plin2	0	0	0	0	0
41721	22768	14 dpf	Plin2	0	0	0	0	1
41721	22771	14 dpf	Plin2	0	0	0	0	1
041521_2	22380	14 dpf	Plin2	0	0	0	0	1
041521_2	22383	14 dpf	Plin2	0	0	1	0	1
041521_2	22410	14 dpf	Plin2	0	0	0	0	1
041521_2	22413	14 dpf	Plin2	0	0	1	0	1
041521_2	22416	14 dpf	Plin2	0	0	0	0	1
041521_2	22419	14 dpf	Plin2	0	0	0	0	1
041521_2	22425	14 dpf	Plin2	0	0	1	0	1
041521_2	22428	14 dpf	Plin2	0	0	1	0	0
041521_2	22434	14 dpf	Plin2	0	0	0	0	0
041521_3	22437	14 dpf	Plin2	0	0	1	0	1
041521_3	22440	14 dpf	Plin2	0	0	0	0	1
041521_3	22443	14 dpf	Plin2	0	0	0	0	0
041521_3	22455	14 dpf	Plin2	0	0	1	0	1
041521_3	22468	14 dpf	Plin2	0	0	1	0	1
041521_3	22472	14 dpf	Plin2	0	0	0	0	0
041521_3	22484	14 dpf	Plin2	0	0	0	0	1
40121	20916	21 dpf	Plin2	0	0	1	0	1
40121	20919	21 dpf	Plin2	0	0	0	0	0
40121	20937	21 dpf	Plin2	0	0	1	0	1
40121	20946	21 dpf	Plin2	0	0	1	0	1
40121	20949	21 dpf	Plin2	0	0	0	0	1
40121	20959	21 dpf	Plin2	0	0	0	0	1
40121	20962	21 dpf	Plin2	0	0	0	0	1
40121	20968	21 dpf	Plin2	0	0	0	0	1
40521	21055	21 dpf	Plin2	0	0	1	0	1
40521	21065	21 dpf	Plin2	0	0	1	0	1
40521	21068	21 dpf	Plin2	0	1	1	0	1
40521	21080	21 dpf	Plin2	0	0	1	0	1
40521	21083	21 dpf	Plin2	0	0	1	0	1
40521	21086	21 dpf	Plin2	0	0	1	0	1
40521	21095	21 dpf	Plin2	0	0	1	0	1
40521	21104	21 dpf	Plin2	0	0	1	0	1
40521	21107	21 dpf	Plin2	0	0	0	0	0
40521	21113	21 dpf	Plin2	0	0	1	0	1
40521	21116	21 dpf	Plin2	0	0	1	0	1
42221	23283	21 dpf	Plin2	0	0	1	0	1
42221	23286	21 dpf	Plin2	0	1	1	0	1
42221	23289	21 dpf	Plin2	0	0	1	0	1
42221	23292	21 dpf	Plin2	0	0	1	0	1
42221	23301	21 dpf	Plin2	0	0	1	0	1
42221	23304	21 dpf	Plin2	0	0	1	0	1
42221	23307	21 dpf	Plin2	0	0	1	0	1
42221	23310	21 dpf	Plin2	0	0	1	0	1
42221	23319	21 dpf	Plin2	0	0	1	0	1
42221	23328	21 dpf	Plin2	0	0	0	0	0
42221	23331	21 dpf	Plin2	0	0	1	0	1
42221	23334	21 dpf	Plin2	0	0	1	0	1
42221	23337	21 dpf	Plin2	0	0	1	0	1
42221	23343	21 dpf	Plin2	0	0	1	0	1
42221	23346	21 dpf	Plin2	0	0	1	0	1
42221	23349	21 dpf	Plin2	0	0	0	0	1
42221	23352	21 dpf	Plin2	0	0	1	0	1
42221	23355	21 dpf	Plin2	0	0	1	0	1
42221	23358	21 dpf	Plin2	0	0	1	0	1
42221	23361	21 dpf	Plin2	0	0	1	0	1
42221	23373	21 dpf	Plin2	0	0	1	0	1
41621	22487	42 dpf	Plin2	0	0	1	0	1
41621	22490	42 dpf	Plin2	1	1	1	1	1
41621	22493	42 dpf	Plin2	1	1	1	1	1
41621	22496	42 dpf	Plin2	1	1	1	1	1
41621	22499	42 dpf	Plin2	1	1	1	1	1
41621	22502	42 dpf	Plin2	1	1	1	1	1
41621	22517	42 dpf	Plin2	1	1	1	1	1
41621	22529	42 dpf	Plin2	1	1	0	1	1
41621	22532	42 dpf	Plin2	1	1	1	1	1
41621	22535	42 dpf	Plin2	1	1	1	1	1
41621	22550	42 dpf	Plin2	1	1	1	1	1
41621	22553	42 dpf	Plin2	1	1	1	1	1
41621	22562	42 dpf	Plin2	1	1	1	1	1
41621	22566	42 dpf	Plin2	1	1	1	1	1
41621	22569	42 dpf	Plin2	1	1	1	1	1
41621	22572	42 dpf	Plin2	1	1	1	1	1
41621	22575	42 dpf	Plin2	1	1	1	1	1
41621	22584	42 dpf	Plin2	1	1	1	1	1
041621_2	22602	42 dpf	Plin2	1	1	1	1	1
041621_2	22620	42 dpf	Plin2	1	1	1	1	1
041621_2	22623	42 dpf	Plin2	1	1	1	1	1
041621_2	22629	42 dpf	Plin2	1	1	1	1	1
041621_2	22635	42 dpf	Plin2	1	1	1	1	1
041621_2	22641	42 dpf	Plin2	1	1	1	1	1
041621_2	22644	42 dpf	Plin2	1	1	1	1	1
041621_2	22656	42 dpf	Plin2	1	1	1	1	1
041621_2	22662	42 dpf	Plin2	1	1	1	1	1
041621_2	22665	42 dpf	Plin2	1	1	1	1	1
041621_2	22668	42 dpf	Plin2	1	1	1	1	1
041621_2	22677	42 dpf	Plin2	1	1	1	1	1
041621_2	22683	42 dpf	Plin2	1	1	1	1	1
041621_2	22689	42 dpf	Plin2	1	1	1	1	1
041621_2	22695	42 dpf	Plin2	1	1	1	1	1
42121	23016	42 dpf	Plin2	1	1	1	1	1
42121	23025	42 dpf	Plin2	1	1	1	1	1
42121	23028	42 dpf	Plin2	1	1	1	1	1
42121	23043	42 dpf	Plin2	1	1	1	1	1
42121	23049	42 dpf	Plin2	1	1	1	1	1
42121	23052	42 dpf	Plin2	1	1	1	1	1
42121	23064	42 dpf	Plin2	1	1	1	1	1
42121	23067	42 dpf	Plin2	1	1	1	1	1
42121	23079	42 dpf	Plin2	1	1	1	1	1
42121	23082	42 dpf	Plin2	1	1	1	1	1
40621	21311	5 dpf	Plin2	0	0	0	0	0
40621	21314	5 dpf	Plin2	0	0	0	0	0
40621	21320	5 dpf	Plin2	0	0	0	0	0
40621	21326	5 dpf	Plin2	0	0	0	0	0
40621	21336	5 dpf	Plin2	0	0	0	0	0
40621	21339	5 dpf	Plin2	0	0	0	0	0
40621	21345	5 dpf	Plin2	0	0	0	0	0
40621	21348	5 dpf	Plin2	0	0	0	0	0
40821	21604	5 dpf	Plin2	0	0	0	0	0
40821	21607	5 dpf	Plin2	0	0	0	0	0
40821	21616	5 dpf	Plin2	0	0	0	0	0
40821	21622	5 dpf	Plin2	0	0	0	0	0
40821	21629	5 dpf	Plin2	0	0	0	0	0
40821	21635	5 dpf	Plin2	0	0	0	0	0
40821	21638	5 dpf	Plin2	0	0	0	0	0
40821	21644	5 dpf	Plin2	0	0	0	0	0
40821	21651	5 dpf	Plin2	0	0	0	0	0
040821_2	21789	5 dpf	Plin2	0	0	0	0	0
040821_2	21792	5 dpf	Plin2	0	0	0	0	0
040821_2	21795	5 dpf	Plin2	0	0	0	0	0
040821_2	21798	5 dpf	Plin2	0	0	0	0	0
040821_2	21804	5 dpf	Plin2	0	0	0	0	0
040821_2	21807	5 dpf	Plin2	0	0	0	0	0
040821_2	21816	5 dpf	Plin2	0	0	0	0	0
040821_2	21819	5 dpf	Plin2	0	0	0	0	0
040821_2	21822	5 dpf	Plin2	0	0	0	0	0
040821_2	21825	5 dpf	Plin2	0	0	0	0	0
040821_2	21828	5 dpf	Plin2	0	0	0	0	0
040821_2	21834	5 dpf	Plin2	0	0	0	0	0
040821_2	21837	5 dpf	Plin2	0	0	0	0	0
040821_2	21840	5 dpf	Plin2	0	0	0	0	0
040821_2	21843	5 dpf	Plin2	0	0	0	0	0
040821_2	21849	5 dpf	Plin2	0	0	0	0	0
040821_2	21852	5 dpf	Plin2	0	0	0	0	0
040821_2	21858	5 dpf	Plin2	0	0	0	0	0
040821_2	21867	5 dpf	Plin2	0	0	0	0	0
040821_2	21873	5 dpf	Plin2	0	0	0	0	0
40521	21122	Adult	Plin2	1	1	1	1	1
40521	21125	Adult	Plin2	1	1	1	0	1
40521	21128	Adult	Plin2	1	0	0	0	1
40521	21137	Adult	Plin2	1	1	1	1	1
40521	21140	Adult	Plin2	1	1	1	1	1
40521	21155	Adult	Plin2	1	1	1	1	1
40521	21158	Adult	Plin2	1	1	1	1	1
40521	21164	Adult	Plin2	1	1	1	0	1
40721	21497	Adult	Plin2	1	1	1	1	1
40721	21500	Adult	Plin2	1	1	1	1	1
40721	21509	Adult	Plin2	1	1	1	1	1
40721	21520	Adult	Plin2	1	1	1	1	1
40721	21529	Adult	Plin2	1	1	1	1	1
40721	21532	Adult	Plin2	1	1	1	1	1
40721	21535	Adult	Plin2	1	1	1	1	1
40721	21541	Adult	Plin2	1	1	1	1	1
041321_1	22104	Adult	Plin2	1	1	1	1	1
041321_1	22110	Adult	Plin2	1	1	1	1	1
041321_1	22113	Adult	Plin2	1	1	1	1	1
041321_1	22119	Adult	Plin2	1	1	1	1	1
041321_1	22122	Adult	Plin2	1	1	1	1	1
041321_2	22050	Adult	Plin2	1	1	1	1	1
041321_2	22068	Adult	Plin2	1	1	1	1	1
041321_2	22071	Adult	Plin2	1	1	1	1	1
041321_2	22077	Adult	Plin2	1	1	1	1	1
041321_2	22083	Adult	Plin2	1	1	1	1	1
041321_2	22086	Adult	Plin2	1	1	1	1	1
42221	23378	Adult	Plin2	1	1	1	1	1
42221	23381	Adult	Plin2	1	1	1	1	1

## Sheet: Total Percents
WT - BODIPY
	APPSAT	TSAT	CSAT	NVAT	VAT
5 dpf	0	0	0	0	0
14 dpf	0	0	28.125	0	59.375
21 dpf	0	0	70	0	90
42 dpf	95.8333	100	100	97.9167	100
Adult	100	100	100	97.3684	100
Tg - BODIPY
	APPSAT	TSAT	CSAT	NVAT	VAT
5 dpf	0	0	0	0	0
14 dpf	0	0	18.75	0	68.75
21 dpf	0	2.5	77.5	0	90
42 dpf	95.3488	97.6744	97.6744	97.6744	100
Adult	100	96.5517	100	93.1034	96.5517
Tg - tdTomato
	APPSAT	TSAT	CSAT	NVAT	VAT
5 dpf	0	0	0	0	0
14 dpf	0	0	18.75	0	64.5833
21 dpf	0	5	80	0	92.5
42 dpf	97.6744	97.6744	97.6744	97.6744	100
Adult	100	96.5517	96.5517	89.6552	100
