# Supplementary material for: An in vivo reporter for tracking lipid droplet dynamics in transparent zebrafish
Source: eLife. 2021 Jun 11;10:e64744. doi: 10.7554/eLife.64744 (PMC8195600; doi:10.7554/eLife.64744)
Supplement: Figure 2—source data 1. [file elife-64744-fig2-data1.xlsx]

## Sheet: Area (mm2)
Fish Number	Wild-type sibling	Tg(-3.5ubb:plin2-tdTomato)
1	0.00354419	0.146334
2	0.388046	0.122638
3	0.168732	0.0799638
4	0.339797	0.0447642
5	0.21691	0.169558
6	0.126595	0.0743887
7	0.322797	0.114351
8	0.277292	0.147022
9	0.158637	0.39689
10	0.255424	0.853959
11	0.474227	1.07051
12	0.117541	0.537604
13	0.240966	0.529198
14	0.57465	0.577474
15	0.337111	0.437153
16	0.629428	0.487486
17	0.580776	0.495938
18	0.873145	0.399996
19	0.415301	0.266135
20	0.590116	0.0913759
21	0.644249	0.375927
22	0.813966	0.318781
23	0.340263	0.25338
24	0.7102	0.444904
25	0.463584	0.285435
26	0.57929	0.386192
27	0.481713	0.368878
28	0.286103	0.156193
29	0.390103
30	0.282205
31	0.146589
32	0.258667
33	0.147651
34	0.224902
35	0.179673

## Sheet: Area statistics
Mann Whitney test	P value
WT vs Tg	0.4211
	WT	Tg(-3.5ubb:plin2-tdTomato)
Mean	0.3726	0.344
Std. Deviation	0.2111	0.2392
Std. Error of Mean	0.03568	0.04521

## Sheet: Standard Length (mm)
Fish Number	Wild-type sibling	Tg(-3.5ubb:plin2-tdTomato)
1	6.66504	7.41847
2	8.59756	7.2353
3	7.26135	7.64011
4	8.54409	6.93309
5	7.01485	7.22358
6	7.26872	7.1133
7	8.91439	7.39362
8	8.6016	7.44556
9	7.58127	8.07239
10	7.44306	9.39492
11	9.1737	8.70799
12	6.81779	7.66628
13	8.40735	8.93542
14	8.58982	9.59111
15	8.47947	8.28686
16	8.92404	8.61508
17	8.98628	6.49873
18	9.37236	7.18351
19	9.03916	6.7702
20	8.3584	6.74749
21	9.98194	7.39873
22	9.9903	7.37204
23	8.35407	7.76975
24	9.86866	7.98881
25	7.96859	7.45554
26	9.21439	7.33091
27	8.72622	7.34311
28	7.32671	6.99441
29	7.54313
30	7.3323
31	6.79788
32	7.50664
33	7.20792
34	7.23069
35	6.82915

## Sheet: Standard Length statistics
Mann Whitney test	P value
WT vs Tg	0.0606
	WT	Tg(-3.5ubb:plin2-tdTomato)
Mean	8.169	7.662
Std. Deviation	0.9777	0.7812
Std. Error of Mean	0.1653	0.1476

## Sheet: Area over standard length
Fish Number	Wild-type sibling	Tg(-3.5ubb:plin2-tdTomato)
1	0.00053176	0.0197256
2	0.0451345	0.01695
3	0.0232371	0.0104663
4	0.0397698	0.00645661
5	0.0309215	0.0234728
6	0.0174164	0.0104577
7	0.0362107	0.0154661
8	0.0322373	0.0197462
9	0.0209248	0.0491664
10	0.0343171	0.0908959
11	0.0516942	0.122934
12	0.0172404	0.0701258
13	0.0286613	0.0592247
14	0.066899	0.0602093
15	0.0397561	0.0527526
16	0.0705318	0.0565852
17	0.0646292	0.076313
18	0.0931617	0.0556825
19	0.0459447	0.0393098
20	0.0706015	0.0135422
21	0.0645415	0.0508096
22	0.0814756	0.0432418
23	0.0407302	0.0326111
24	0.0719652	0.0556909
25	0.0581764	0.038285
26	0.062868	0.05268
27	0.0552029	0.0502345
28	0.0390494	0.0223312
29	0.0517164
30	0.038488
31	0.021564
32	0.0344584
33	0.0204845
34	0.0311038
35	0.0263097

## Sheet: Area over SL statistics
Mann Whitney test	P value
WT vs Tg	0.7056
	WT	Tg(-3.5ubb:plin2-tdTomato)
Mean	0.04366	0.04341
Std. Deviation	0.02093	0.02703
Std. Error of Mean	0.003538	0.005108
