# Supplementary material for: An in vivo reporter for tracking lipid droplet dynamics in transparent zebrafish
Source: eLife. 2021 Jun 11;10:e64744. doi: 10.7554/eLife.64744 (PMC8195600; doi:10.7554/eLife.64744)
Supplement: Figure 3—figure supplement 1—source data 1. [file elife-64744-fig3-figsupp1-data1.xlsx]

## Sheet: Area (mm2)
Fish Number	DMSO	Forskolin
1	0.481291	0.137573
2	0.245402	0.249016
3	0.208107	0.709571
4	0.445925	0.3168
5	0.482719	0.30954
6	0.282078	0.371285
7	0.368868	0.262732
8	0.476697	0.281101
9	0.359557	0.343668
10	0.355308	0.306739
11	0.332963	0.228574
12	0.39814	0.24112
13	0.226447	0.502756
14	0.431317	0.198224
15	0.348511	0.484054
16	0.286176	0.216088
17	0.331741	0.46898
18	0.602696	0.554776
19	0.480794	0.565446
20	0.434849	0.45641
21	0.452668	0.436181
22	0.344777	0.493464
23	0.664034	0.449854
24	0.652249	0.438019
25	0.56302	0.446872
26	0.587438	0.484369
27	0.509696	0.514231
28	0.566379	0.435568
29	0.607082	0.462618
30	0.215639	0.623722
31	0.418028	0.556363
32	0.717433	0.410488
33	0.659158	0.494405
34	0.529881	0.74245
35	0.561019	0.479375
36	0.563908	0.674971
37	0.616768	0.435629
38	0.582421	0.475286
39	0.63309	0.80269
40	0.739997	0.64767
41	0.497501	0.473037
42	0.649489	0.561667
43	0.609347	0.341368
44	0.470001	0.611979
45	0.653969	0.808198
46	0.625886	0.371119
47	0.695011	0.699058
48	0.56763	0.27416
49	0.636238	0.449536
50	0.56943	0.507065
51	0.737532	0.390629
52	0.702758	0.459054
53	0.797767	0.325726
54		0.330653
55		0.519873

## Sheet: Area Statistics
Mann Whitney test	P value
Forskolin vs. DMSO	0.0341
	DMSO	Forskolin
Mean	0.509	0.4515
Std. Deviation	0.1507	0.1526
Std. Error of Mean	0.0207	0.02058

## Sheet: Standard Length (mm)
Fish Number	DMSO	Forskolin
1	8.83163	8.16601
2	9.49761	9.06485
3	8.25791	11.0281
4	10.0674	9.07614
5	8.60596	8.90433
6	8.83236	9.17657
7	9.62691	8.4344
8	9.89615	9.90971
9	9.62613	9.26592
10	8.45321	8.65771
11	10.2606	8.83715
12	10.0189	9.28403
13	7.95198	9.89363
14	9.55792	8.84231
15	10.0567	9.66827
16	9.47324	9.40292
17	9.12854	10.711
18	11.077	9.033
19	10.699	10.292
20	9.914	9.688
21	9.727	10.272
22	9.616	10.386
23	10.393	10.526
24	10.504	10.402
25	10.832	9.77
26	9.97758	10.781
27	9.47783	10.853
28	11.4483	9.913
29	9.97996	10.9356
30	11.3036	10.6797
31	9.84307	9.7645
32	9.77476	9.5083
33	10.8538	9.29382
34	9.24006	11.6446
35	10.9452	10.2586
36	9.90542	10.8858
37	10.8069	9.38418
38	9.80156	10.457
39	10.3562	10.7115
40	9.42253	10.6274
41	9.39527	9.61687
42	10.4165	10.4366
43	10.201	10.2919
44	10.5572	9.56935
45	9.64658	10.3355
46	10.1952	9.79542
47	10.2914	10.6307
48	9.70466	9.96411
49	10.2302	9.74156
50	10.1191	9.04736
51	11.0768	9.32378
52	10.3629	9.94437
53	10.2719	10.1282
54		9.94883
55		9.98691

## Sheet: Standard Length Statistics
Mann Whitney test	P value
Forskolin vs. DMSO	0.6418
	DMSO	Forskolin
Mean	9.934	9.875
Std. Deviation	0.7475	0.7345
Std. Error of Mean	0.1027	0.09904

## Sheet: Area ov. Std. Length
Fish Number	DMSO	Forskolin
1	0.0544963	0.016847
2	0.0258383	0.0274705
3	0.025201	0.0643421
4	0.0442942	0.0349047
5	0.0560912	0.0347628
6	0.0319369	0.0404601
7	0.0383163	0.03115
8	0.04817	0.0283662
9	0.0373522	0.0370894
10	0.0420323	0.0354296
11	0.0324506	0.0258652
12	0.0397389	0.0259714
13	0.0284769	0.0508161
14	0.0451266	0.0224176
15	0.0346546	0.0500663
16	0.0302088	0.0229809
17	0.0363411	0.0437859
18	0.0544099	0.0614174
19	0.0449379	0.0549394
20	0.0438639	0.0471131
21	0.046535	0.0424633
22	0.035856	0.0475146
23	0.0638954	0.0427363
24	0.0620946	0.0421081
25	0.0519762	0.0457413
26	0.0588758	0.0449274
27	0.0537778	0.0473814
28	0.0494729	0.0439403
29	0.0608301	0.0423041
30	0.019077	0.0584026
31	0.0424693	0.0569781
32	0.0733965	0.0431716
33	0.0607304	0.0531971
34	0.057346	0.063759
35	0.0512571	0.0467293
36	0.0569292	0.0620047
37	0.0570717	0.0464216
38	0.0594212	0.0454516
39	0.0611313	0.0749372
40	0.0785348	0.0609431
41	0.0529523	0.0491883
42	0.0623521	0.0538172
43	0.0597339	0.0331688
44	0.0445195	0.063952
45	0.0677929	0.0781964
46	0.0613899	0.037887
47	0.0675332	0.0657583
48	0.0584905	0.0275148
49	0.0621923	0.0461462
50	0.0562726	0.0560456
51	0.0665837	0.041896
52	0.0678148	0.0461622
53	0.0776649	0.0321603
54		0.0332354
55		0.0520554

## Sheet: Area ov. Std Length Stats
Mann Whitney test	P value
Forskolin vs. DMSO	0.027
	DMSO	Forskolin
Mean	0.05094	0.04517
Std. Deviation	0.01387	0.01339
Std. Error of Mean	0.001906	0.001805
