# Supplementary material for: An in vivo reporter for tracking lipid droplet dynamics in transparent zebrafish
Source: eLife. 2021 Jun 11;10:e64744. doi: 10.7554/eLife.64744 (PMC8195600; doi:10.7554/eLife.64744)
Supplement: Figure 3—source data 1. [file elife-64744-fig3-data1.xlsx]

## Sheet: Area (mm2)
Fish Number	Wild-type Fed	Tg(-3.5ubb:plin2-tdTomato) Fed	Wild-type Fasted	Tg(-3.5ubb:plin2-tdTomato) Fasted
1	0.304335	0.947306	0.0265424	0.0275673
2	0.49825	1.05674	0.0427195	0.00022128
3	0.229518	0.367949	0.00026787	0.00946863
4	0.571262	0.337062	0.0437094	0.00392488
5	0.32382	0.609172	0.00045422	0.00696463
6	0.439214	1.0717	0.0006755	0.00350561
7	0.570762	1.1883	0.0211384	0.0120309
8	0.68244	0.534937	0.0132537	0.00227107
9	1.95564	0.69503	0.00775659	0.00465861
10	1.55494	0.818693	0.0155714	0
11	1.36278	0.892509	0.00030281	0.0192284
12	1.09064	0.984155	0.00286505	0.117211
13	0.674066	1.33293	0.00168875	0.00456544
14	1.37658	0.765655	0	0.00797787
15	1.02128	1.34743	0	0.0773912
16	1.28662	0.890377	0.0001747	0.00414617
17	1.19217	1.08284	0.00175863	0.0129859
18	0.874841	1.57409	0.00121124	0.00338914
19	1.185	1.04936	0.00685981	0.322865
20	0.591982	1.47431	0.00175863	0.00510118
21	0.42723	1.23134	0.00138594
22	0.429827	0.660754	0.00153734
23	0.474084	0.788284	0.00119959
24	0.498716	0.622158	0.00080361
25			0
26			1.1647e-05
27			0
28			0.00045422
29			0.0615519

## Sheet: Area statistics
Dunn's multiple comparisons test	P value
WT Fed vs Tg Fed	>0.9999
WT Fasted vs Tg Fasted	0.7986
WT Fed vs WT Fasted	<0.0001
WT Fed vs Tg Fasted	<0.0001
	WT Fed	Tg Fed	WT Fasted	Tg Fasted
Mean	0.8173	0.9301	0.008816	0.03227
Std. Deviation	0.4613	0.3293	0.01578	0.07431
Std. Error of Mean	0.09417	0.06721	0.00293	0.01662

## Sheet: Standard Length (mm)
Fish Number	Wild-type Fed	Tg(-3.5ubb:plin2-tdTomato) Fed	Wild-type Fasted	Tg(-3.5ubb:plin2-tdTomato) Fasted
1	7.77162	10.1085	7.20511	7.54075
2	9.88384	9.81848	7.09552	7.06064
3	9.283	8.69929	6.78015	7.402
4	9.47277	8.1478	6.76893	6.86129
5	8.56059	9.69881	6.48623	7.46792
6	8.53941	9.67264	6.87813	7.51753
7	9.48628	10.3831	7.7183	7.18407
8	8.76666	9.44379	6.93566	6.39472
9	10.7733	10.7309	7.55855	7.17841
10	10.5484	10.1963	7.55976	7.50162
11	9.2179	10.4301	7.45951	8.18303
12	10.2316	9.95872	6.84983	7.18608
13	8.71035	10.3963	7.0862	7.63015
14	10.2661	8.95044	7.00819	7.45408
15	10.6983	10.5538	7.28135	7.84098
16	11.0366	9.43247	7.02911	7.61428
17	10.8712	10.6811	6.69294	7.59578
18	10.3797	10.4909	6.85424	8.06151
19	10.6357	11.3497	7.70806	8.35299
20	9.94567	10.212	7.2	8.16058
21	8.19983	11.8316	7.73753
22	9.70985	9.98618	7.80422
23	8.86275	9.82492	6.87865
24	8.83876	9.75875	6.42746
25			7.79783
26			7.13392
27			8.478
28			6.46569
29			7.80456

## Sheet: Standard Length statistics
Dunn's multiple comparisons test	P value
WT Fed vs Tg Fed	>0.9999
WT Fasted vs Tg Fasted	>0.9999
WT Fed vs WT Fasted	<0.0001
WT Fed vs Tg Fasted	<0.0001
	WT Fed	Tg Fed	WT Fasted	Tg Fasted
Mean	9.612	10.03	7.196	7.509
Std. Deviation	0.9392	0.7929	0.4909	0.4723
Std. Error of Mean	0.1917	0.1618	0.09115	0.1056

## Sheet: Area over standard length
Fish Number	Wild-type Fed	Tg(-3.5ubb:plin2-tdTomato) Fed	Wild-type Fasted	Tg(-3.5ubb:plin2-tdTomato) Fasted
1	0.0391598	0.0937139	0.00368384	0.00365578
2	0.0504106	0.107627	0.00602063	3.1341e-05
3	0.0247246	0.0422964	3.9508e-05	0.0012792
4	0.0603057	0.0413685	0.00645736	0.00057203
5	0.0378268	0.0628089	7.0028e-05	0.00093261
6	0.0514338	0.110797	9.821e-05	0.00046632
7	0.0601671	0.114445	0.00273874	0.00167466
8	0.0778449	0.0566443	0.00191096	0.00035515
9	0.181527	0.064769	0.0010262	0.00064898
10	0.14741	0.0802934	0.00205978	0
11	0.147841	0.0855707	4.0594e-05	0.00234979
12	0.106595	0.0988234	0.00041827	0.0163108
13	0.0773868	0.128213	0.00023831	0.00059834
14	0.134091	0.0855438	0	0.00107027
15	0.095462	0.127673	0	0.00987009
16	0.116577	0.094395	2.4853e-05	0.00054452
17	0.109664	0.101378	0.00026276	0.00170962
18	0.0842836	0.150043	0.00017671	0.00042041
19	0.111417	0.092457	0.00088995	0.0386526
20	0.0595215	0.144371	0.00024425	0.0006251
21	0.0521023	0.104072	0.00017912
22	0.0442671	0.0661669	0.00019699
23	0.0534917	0.0802331	0.00017439
24	0.0564238	0.0637538	0.00012503
25			0
26			1.6326e-06
27			0
28			7.025e-05
29			0.00788666

## Sheet: Area over SL statistics
Dunn's multiple comparisons test	P value
WT Fed vs Tg Fed	>0.9999
WT Fasted vs Tg Fasted	0.8132
WT Fed vs WT Fasted	<0.0001
WT Fed vs Tg Fasted	<0.0001
	WT Fed	Tg Fed	WT Fasted	Tg Fasted
Mean	0.0825	0.09156	0.001208	0.004088
Std. Deviation	0.04124	0.02933	0.002148	0.009043
Std. Error of Mean	0.008418	0.005987	0.0003988	0.002022
