# Supplementary material for: An in vivo reporter for tracking lipid droplet dynamics in transparent zebrafish
Source: eLife. 2021 Jun 11;10:e64744. doi: 10.7554/eLife.64744 (PMC8195600; doi:10.7554/eLife.64744)
Supplement: Figure 3—source data 2. [file elife-64744-fig3-data2.xlsx]

## Sheet: Area (mm2)
Fish Number	Day	Fed	Fasted
1	0	0.443794	0.212543
2	0	0.341067	0.331067
3	0	0.174946	0.52933
4	0	0.48523	0.770262
5	0	0.445336	0.248278
6	0	1.04315	0.358513
7	0	0.619625	0.669367
8	0	0.499775	0.540998
9	0	0.375502	0.527762
10	0	0.67873	0.268734
11	0	0.606891	0.572129
12	0	0.301056	0.32469
13	0	0.234571	0.492429
14	0	0.559622	0.183625
15	0	0.167571	0.409874
16	0	0.644764	0.447697
17	0	0.2472	0.619855
18	0	0.980205	0.410763
19	0	0.387594	0.208769
20	0	0.237968	0.272855
21	0	0.550604	0.451374
22	0	0.557782	0.738455
23	0	0.15579	0.245125
24	0	0.177353	0.350715
25	0	0.160888	0.528311
26	0	0.0482752	0.678965
27	0	0.391833	0.615964
28	0	0.26826	0.641217
29	0	0.173668	0.229456
30	0	0.425823	0.170263
31	0	0.40382	0.381875
32	0	0.500274	0.319127
33	0	0.490056	0.548516
34	0	0.189604	0.35557
35	0	0.273304	0.591089
36	0	0.329881	0.0776412
37	0	0.135073	0.0768111
38	0	0.380311	0.0817669
39	0	0.219515	0.442133
40	0	0.352174	0.251108
41	0	0.149295	0.626572
42	0	0.477306	0.145056
43	0	0.2238	0.409841
44	0	0.286884	0.393963
45	0	0.111062	0.718183
46	0	0.422792	0.420289
47	0	0.322879	0.0943996
48	0	0.408872	0.437161
49	0	0.403367	0.208698
50	0	0.13369	0.171127
51	0	0.0593483	0.50853
52	0	0.320217	0.358769
53	0		0.3457
54	0		0.115334
55	0		0.247477
56	0		0.312775
57	0		0.227658
58	0		0.406319
59	0		0.25595
60	0		0.09928
61	0		0.456867
1	2	0.494023	0.185398
2	2	0.508685	0.247935
3	2	1.06671	0.124701
4	2	0.463626	0.759444
5	2	0.458162	0.644091
6	2	1.1541	0.280102
7	2	0.964678	0.480639
8	2	0.976012	0.81676
9	2	0.500155	0.142887
10	2	0.79917	0.246304
11	2	0.691325	0.457815
12	2	0.606533	0.350369
13	2	0.646541	0.478163
14	2	0.342469	0.734451
15	2	1.21958	0.513867
16	2	0.720726	0.284248
17	2	1.02695	0.253373
18	2	1.21014	0.235822
19	2	1.08591	0.238731
20	2	0.779536	0.873276
21	2	1.07448	0.371785
22	2	0.900221	0.26485
23	2	0.448611	0.197452
24	2	0.483633	0.31669
25	2	0.367022	0.778154
26	2	0.408557	0.476846
27	2	0.316323	0.678412
28	2	0.869143	0.392493
29	2	0.308841	0.767004
30	2	0.597807	0.354274
31	2	0.323601	0.856597
32	2	0.15031	0.761828
33	2	0.425334	0.134463
34	2	0.500817	0.118471
35	2	0.609088	0.0328344
36	2	0.560406	0.740183
37	2	0.567789	0.189158
38	2	0.335904	0.566872
39	2	0.512065	0.221115
40	2	0.537353	0.748929
41	2	0.47078	0.425924
42	2	0.732623	0.307092
43	2	0.667852	0.164572
44	2	0.852346	0.400826
45	2	0.661772	0.477416
46	2	0.858438	0.888704
47	2	0.664458	0.413051
48	2		0.275431
49	2		0.323935
50	2		0.0874711
51	2		0.0630287
52	2		0.31667
53	2		0.124583
54	2		0.289823
55	2		0.200151
56	2		1.0591
57	2		0.439098
58	2		0.455345
59	2		0.427149
60	2		0.372034
61	2		0.182076
1	5	0.667282	0
2	5	0.521774	0.260081
3	5	0.941409	0.0989225
4	5	0.943407	0.359128
5	5	0.958324	0.853047
6	5	0.391059	0.237427
7	5	0.854789	0.145311
8	5	0.82772	0.186027
9	5	0.273249	0.379515
10	5	1.09976	0.557884
11	5	0.763676	0.0354877
12	5	0.747271	0.533042
13	5	0.661255	0.58175
14	5	0.907533	0.0880476
15	5	1.04589	0.469823
16	5	0.846567	0.17166
17	5	0.590731	0.654003
18	5	0.751051	0.0769041
19	5	0.5014	0.109928
20	5	0.389814	0.102899
21	5	0.834592	0.43959
22	5	0.496296	0.343156
23	5	0.48514	0.0597859
24	5	0.622236	0.213018
25	5	0.635463	0.326648
26	5	0.411616	0
27	5	0.204488	0.137404
28	5	0.865199	0.360609
29	5	0.436072	0.620166
30	5	0.655929	0.233693
31	5	0.499952	0
32	5	0.403329	0
33	5	0.209545	0
34	5	0.833039	0
35	5	0.624437	0.027397
36	5	0.620808	0.0900261
37	5	0.878137	0.2212
38	5	0.67796	0.203505
39	5	0.548208	0.00667563
40	5	0.685383	0.331312
41	5	1.17102	0.277186
42	5	0.594086	0.0862985
43	5	0.904001	0.063769
44	5	0.646253	0.453236
45	5	0.551575	0.0173278
46	5	0.603008	0.239871
47	5		0.136199
48	5		0
49	5		0.0259754
50	5		0.0677128
51	5		0.0596418
52	5		0.118825
53	5		0.702278
54	5		0.101137
55	5		0.160621
56	5		0
57	5		0.0435652
1	7	1.09377	0.100428
2	7	0.748416	0.0733497
3	7	0.997477	0.564483
4	7	0.915579	0.206341
5	7	1.53402	0.213958
6	7	0.808093	0.0190421
7	7	1.44574	0.336409
8	7	0.537533	0.0318649
9	7	1.08983	0.214319
10	7	0.818249	0.646568
11	7	0.779105	0.0971319
12	7	1.22385	0.718205
13	7	1.38104	0.0867316
14	7	1.01735	0.321979
15	7	0.671526	0.0155597
16	7	0.897201	0
17	7	1.10649	0.0971785
18	7	1.38375	0
19	7	0.306664	0.535611
20	7	0.626594	0.793605
21	7	0.972984	0.0546221
22	7	0.522812	0.0213946
23	7	0.549028	0.0595719
24	7	0.206993	0.177691
25	7	0.378127	0
26	7	0.538663	0.0158509
27	7	0.78961	0.0155597
28	7	0.744305	0
29	7	0.454377	0.398777
30	7	0.543519	0.226035
31	7	0.583187	0.0484728
32	7	0.526376	0.0510816
33	7	0.872859	0.231684
34	7	0.513367	0
35	7	0.941189	0.156704
36	7	0.642783	0
37	7	0.60577	0.158032
38	7	0.558392	0.202801
39	7	0.597396	0.2371
40	7	0.923708	0.497353
41	7	1.16917	0.282253
42	7	0.341068	0.301773
43	7	1.03049	0.148342
44	7	1.55969	0
45	7	1.30971	0.0400058
46	7	0.771605	0.290336
47	7		0.206178
48	7		0
49	7		0
50	7		0
51	7		0
52	7		0
53	7		0.0341359
54	7		0
55	7		0.360809
56	7		0
57	7		0

## Sheet: Area statistics
Mann Whitney Test	P value
Day 0 Fed vs Fasted	0.4572
Day 2 Fed vs Fasted	<0.0001
Day 5 Fed vs Fasted	<0.0001
Day 7 Fed vs Fasted	<0.0001
Day 0	Fed	Fasted
Mean	0.365	0.3793
Std. Deviation	0.2053	0.1831
Std. Error of Mean	0.02847	0.02345
Day 2	Fed	Fasted
Mean	0.6579	0.41
Std. Deviation	0.2682	0.2457
Std. Error of Mean	0.03912	0.03146
Day 5	Fed	Fasted
Mean	0.6692	0.2117
Std. Deviation	0.2261	0.2101
Std. Error of Mean	0.03333	0.02783
Day 7	Fed	Fasted
Mean	0.8267	0.163
Std. Deviation	0.3372	0.1984
Std. Error of Mean	0.04972	0.02628

## Sheet: Standard Length (mm)
Fish Number	Day	Fed	Fasted
1	0	7.32439	7.98814
2	0	7.9372	8.72265
3	0	7.29738	6.88522
4	0	7.57131	8.5834
5	0	7.76295	8.54004
6	0	8.69825	8.06217
7	0	8.40681	8.07826
8	0	7.95915	7.56978
9	0	8.20306	7.85095
10	0	8.11916	7.51491
11	0	8.80105	8.85601
12	0	7.77603	7.30542
13	0	7.13836	8.91008
14	0	8.20346	6.85575
15	0	6.7931	8.23652
16	0	7.70649	8.84975
17	0	7.24827	8.34199
18	0	8.56937	7.43314
19	0	8.64532	7.07752
20	0	7.57927	7.45336
21	0	8.86115	7.86116
22	0	9.16031	8.64653
23	0	7.78455	8.07217
24	0	8.07607	9.33169
25	0	7.4917	8.43594
26	0	6.67772	8.9522
27	0	7.38197	7.79236
28	0	7.97951	8.72271
29	0	8.44836	8.82048
30	0	7.33887	7.30393
31	0	7.21487	8.09749
32	0	7.84218	7.36282
33	0	6.65325	8.09806
34	0	7.88256	6.98158
35	0	7.62148	7.93703
36	0	8.17397	7.36748
37	0	7.83662	7.47963
38	0	7.76772	7.14447
39	0	8.23669	7.95308
40	0	7.74732	8.07634
41	0	8.40865	9.14893
42	0	8.18337	7.80129
43	0	8.55674	7.45121
44	0	7.2893	8.01516
45	0	8.04843	8.56798
46	0	8.95778	8.87855
47	0	8.05596	8.07649
48	0	9.25413	7.82588
49	0	7.99192	7.65778
50	0	8.12259	8.22752
51	0	8.22939	7.79353
52	0	8.81782	8.47427
53	0		7.77315
54	0		7.37499
55	0		8.23779
56	0		9.0973
57	0		8.21411
58	0		7.66597
59	0		7.74478
60	0		7.57303
61	0		7.9026
1	2	8.07724	7.0599
2	2	7.84758	7.42434
3	2	9.33023	6.81815
4	2	7.71416	8.23662
5	2	8.69107	8.76773
6	2	9.05705	9.06064
7	2	8.26398	8.69286
8	2	9.11188	7.74291
9	2	7.60733	7.20406
10	2	8.5778	7.95451
11	2	8.35839	7.61047
12	2	8.0432	7.95988
13	2	8.0432	8.07485
14	2	7.46001	8.71705
15	2	9.18206	8.51097
16	2	8.27385	7.37563
17	2	8.66736	6.77868
18	2	8.45639	7.74388
19	2	9.78096	7.42368
20	2	9.19515	8.71143
21	2	8.98321	7.39216
22	2	7.8168	7.75257
23	2	8.52587	7.46928
24	2	6.95003	8.85689
25	2	8.20408	8.45143
26	2	8.03084	9.33573
27	2	8.06278	8.60474
28	2	8.85689	7.97524
29	2	8.59924	8.36541
30	2	7.88167	8.01181
31	2	7.54934	8.87432
32	2	8.93226	8.89285
33	2	7.76772	6.97701
34	2	7.99903	7.30823
35	2	8.5967	7.48366
36	2	8.16095	8.55314
37	2	7.59751	7.39701
38	2	7.56797	7.95949
39	2	8.60823	6.90602
40	2	7.81146	8.77141
41	2	8.53163	7.95224
42	2	8.6951	7.78433
43	2	8.2908	7.99103
44	2	9.44032	8.03824
45	2	8.62985	7.71285
46	2	9.47568	9.01901
47	2	8.44681	8.11668
48	2		8.0266
49	2		7.6513
50	2		7.26534
51	2		7.49696
52	2		8.14177
53	2		7.64013
54	2		8.02363
55	2		7.76108
56	2		9.03967
57	2		7.86775
58	2		8.46085
59	2		7.7527
60	2		8.23086
61	2		7.58398
1	5	8.53878	7.62346
2	5	8.19303	7.91668
3	5	9.02526	7.33607
4	5	9.60102	8.34823
5	5	10.1186	9.35632
6	5	9.95717	7.38854
7	5	9.2996	7.66659
8	5	9.27015	7.24847
9	5	9.0336	8.46804
10	5	9.14779	8.41389
11	5	8.86909	7.76943
12	5	9.51863	8.51281
13	5	9.83895	8.73462
14	5	9.16758	9.01745
15	5	9.99593	8.76519
16	5	8.71324	7.8649
17	5	9.93183	8.72973
18	5	8.72694	6.74637
19	5	10.1058	6.71911
20	5	8.59346	7.33843
21	5	10.2785	8.66953
22	5	10.9544	8.1876
23	5	9.41275	7.25638
24	5	8.04432	7.1907
25	5	8.3395	8.7307
26	5	7.54059	7.05295
27	5	9.25117	7.77854
28	5	9.2361	7.81234
29	5	8.30098	8.64129
30	5	8.7159	7.99903
31	5	8.23271	7.36238
32	5	8.5007	7.35832
33	5	8.53403	7.28654
34	5	9.70209	6.88884
35	5	9.20123	6.87039
36	5	8.57702	7.83828
37	5	9.31085	7.7047
38	5	8.64129	7.87068
39	5	9.11809	7.95575
40	5	8.35454	8.52782
41	5	10.2247	8.61183
42	5	9.19032	8.12163
43	5	9.23497	7.61819
44	5	10.1718	8.96596
45	5	9.1213	7.93096
46	5	9.32605	7.83919
47	5		7.79401
48	5		7.57308
49	5		7.64258
50	5		8.097
51	5		7.56947
52	5		8.22823
53	5		8.93363
54	5		7.14197
55	5		8.09179
56	5		7.90807
57	5		7.64918
1	7	9.82885	8.29295
2	7	8.56656	7.91037
3	7	9.59145	8.4397
4	7	9.12207	7.36118
5	7	10.7136	8.76096
6	7	9.14832	7.89759
7	7	10.2765	7.68206
8	7	9.84389	7.19887
9	7	9.96687	7.74922
10	7	9.62894	9.26207
11	7	9.06556	8.64401
12	7	9.6275	8.78087
13	7	10.4336	7.78614
14	7	9.91019	8.65006
15	7	9.11047	7.66141
16	7	9.37705	7.18208
17	7	10.4153	8.14877
18	7	10.426	7.83943
19	7	10.5035	8.26182
20	7	9.54872	8.87325
21	7	11.6354	7.14761
22	7	10.8716	6.60781
23	7	10.7879	8.64157
24	7	8.82281	8.60655
25	7	9.25142	7.42666
26	7	9.15716	6.6571
27	7	10.2022	7.04847
28	7	9.74686	7.35614
29	7	9.95412	7.98287
30	7	9.91921	8.6864
31	7	9.12207	6.93722
32	7	8.8074	7.41147
33	7	9.12893	7.68132
34	7	8.1449	7.27618
35	7	9.11459	7.84988
36	7	9.33188	6.82329
37	7	8.71847	7.94794
38	7	9.98678	7.59155
39	7	9.73286	8.63473
40	7	10.0285	8.94961
41	7	10.8625	8.50995
42	7	9.48858	7.85705
43	7	9.02428	7.86046
44	7	10.7769	7.82279
45	7	9.62694	7.41916
46	7	9.78162	8.04223
47	7		7.99832
48	7		7.52154
49	7		7.94004
50	7		7.56777
51	7		7.65313
52	7		8.18097
53	7		7.8009
54	7		7.15597
55	7		8.93016
56	7		8.28843
57	7		7.5894

## Sheet: Standard Length statistics
Mann Whitney Test	P value
Day 0 Fed vs Fasted	0.6606
Day 2 Fed vs Fasted	0.0015
Day 5 Fed vs Fasted	<0.0001
Day 7 Fed vs Fasted	<0.0001
Day 0	Fed	Fasted
Mean	7.958	8.017
Std. Deviation	0.6035	0.6029
Std. Error of Mean	0.08369	0.07719
Day 2	Fed	Fasted
Mean	8.378	7.98
Std. Deviation	0.6116	0.618
Std. Error of Mean	0.08922	0.07913
Day 5	Fed	Fasted
Mean	9.156	7.906
Std. Deviation	0.7022	0.6251
Std. Error of Mean	0.1035	0.08279
Day 7	Fed	Fasted
Mean	9.72	7.891
Std. Deviation	0.715	0.6214
Std. Error of Mean	0.1054	0.08231

## Sheet: Area over Standard Length
Fish Number	Day	Fed	Fasted
1	0	0.0605912	0.0266073
2	0	0.0429707	0.0379549
3	0	0.0239739	0.0768791
4	0	0.064088	0.0897385
5	0	0.0573669	0.0290722
6	0	0.119926	0.0444686
7	0	0.0737051	0.0828604
8	0	0.0627925	0.0714681
9	0	0.0457759	0.0672226
10	0	0.083596	0.0357601
11	0	0.0689567	0.0646035
12	0	0.0387159	0.0444451
13	0	0.0328607	0.0552665
14	0	0.0682178	0.0267842
15	0	0.0246679	0.0497631
16	0	0.0836651	0.0505887
17	0	0.0341047	0.0743054
18	0	0.114385	0.055261
19	0	0.0448328	0.0294975
20	0	0.0313971	0.0366083
21	0	0.0621368	0.0574182
22	0	0.0608911	0.0854048
23	0	0.0200127	0.0303666
24	0	0.0219603	0.0375832
25	0	0.0214755	0.0626262
26	0	0.00722931	0.0758433
27	0	0.0530797	0.0790472
28	0	0.0336186	0.0735113
29	0	0.0205564	0.026014
30	0	0.058023	0.0233112
31	0	0.0559705	0.0471597
32	0	0.0637927	0.0433429
33	0	0.0736566	0.0677342
34	0	0.0240537	0.0509297
35	0	0.0358597	0.0744723
36	0	0.0403575	0.0105384
37	0	0.0172362	0.0102694
38	0	0.0489605	0.0114448
39	0	0.0266509	0.0555927
40	0	0.0454575	0.0310918
41	0	0.0177549	0.0684858
42	0	0.0583263	0.0185939
43	0	0.0261549	0.0550033
44	0	0.0393569	0.0491522
45	0	0.0137992	0.0838218
46	0	0.0471983	0.0473376
47	0	0.0400795	0.0116882
48	0	0.0441827	0.0558609
49	0	0.0504719	0.0272531
50	0	0.016459	0.0207993
51	0	0.00721175	0.0652502
52	0	0.0363147	0.0423362
53	0		0.0444736
54	0		0.0156385
55	0		0.0300416
56	0		0.034381
57	0		0.0277154
58	0		0.0530029
59	0		0.0330481
60	0		0.0131097
61	0		0.0578122
1	2	0.0611624	0.0262607
2	2	0.0648206	0.0333949
3	2	0.114329	0.0182896
4	2	0.0601006	0.0922033
5	2	0.0527164	0.0734615
6	2	0.127425	0.0309141
7	2	0.116733	0.0552912
8	2	0.107114	0.105485
9	2	0.0657465	0.0198343
10	2	0.0931672	0.0309641
11	2	0.0827103	0.0601559
12	2	0.0754094	0.0440169
13	2	0.0803836	0.0592163
14	2	0.0459072	0.0842545
15	2	0.132822	0.060377
16	2	0.0871089	0.0385389
17	2	0.118484	0.0373779
18	2	0.143103	0.0304527
19	2	0.111023	0.032158
20	2	0.0847769	0.100245
21	2	0.11961	0.0502945
22	2	0.115165	0.0341629
23	2	0.0526176	0.0264352
24	2	0.0695872	0.0357563
25	2	0.0447366	0.0920736
26	2	0.0508735	0.0510775
27	2	0.0392325	0.0788417
28	2	0.0981318	0.049214
29	2	0.035915	0.0916875
30	2	0.0758477	0.0442189
31	2	0.0428648	0.0965254
32	2	0.0168278	0.0856675
33	2	0.0547566	0.0192722
34	2	0.0626097	0.0162107
35	2	0.0708513	0.00438748
36	2	0.0686692	0.0865394
37	2	0.0747336	0.0255723
38	2	0.044385	0.0712197
39	2	0.0594855	0.0320177
40	2	0.0687903	0.0853829
41	2	0.0551805	0.0535602
42	2	0.084257	0.03945
43	2	0.0805533	0.0205946
44	2	0.0902877	0.049865
45	2	0.0766841	0.0618988
46	2	0.0905938	0.0985368
47	2	0.0786638	0.0508892
48	2		0.0343147
49	2		0.0423373
50	2		0.0120395
51	2		0.00840724
52	2		0.0388945
53	2		0.0163065
54	2		0.0361212
55	2		0.0257891
56	2		0.117161
57	2		0.0558098
58	2		0.0538179
59	2		0.0550968
60	2		0.0451999
61	2		0.024008
1	5	0.0781472	0
2	5	0.0636851	0.0328523
3	5	0.104308	0.0134844
4	5	0.0982611	0.0430185
5	5	0.0947091	0.0911733
6	5	0.0392741	0.0321345
7	5	0.0919168	0.0189538
8	5	0.0892887	0.0256643
9	5	0.0302481	0.0448174
10	5	0.120222	0.0663051
11	5	0.0861053	0.0045676
12	5	0.0785062	0.0626164
13	5	0.0672078	0.0666027
14	5	0.0989937	0.00976413
15	5	0.104632	0.053601
16	5	0.0971587	0.0218261
17	5	0.0594786	0.0749167
18	5	0.0860613	0.0113993
19	5	0.0496148	0.0163606
20	5	0.0453617	0.0140219
21	5	0.0811982	0.0507051
22	5	0.0453056	0.0419117
23	5	0.0515407	0.00823908
24	5	0.077351	0.029624
25	5	0.0761991	0.0374137
26	5	0.0545867	0
27	5	0.022104	0.0176645
28	5	0.0936758	0.0461588
29	5	0.0525326	0.0717678
30	5	0.0752565	0.0292152
31	5	0.0607275	0
32	5	0.0474466	0
33	5	0.0245541	0
34	5	0.0858618	0
35	5	0.0678645	0.00398768
36	5	0.0723804	0.0114854
37	5	0.0943133	0.0287097
38	5	0.0784559	0.0258561
39	5	0.0601231	0.000839096
40	5	0.0820372	0.0388507
41	5	0.114529	0.0321867
42	5	0.0646425	0.0106258
43	5	0.0978889	0.00837062
44	5	0.0635335	0.0505507
45	5	0.0604711	0.00218483
46	5	0.0646585	0.0305989
47	5		0.0174748
48	5		0
49	5		0.00339877
50	5		0.00836271
51	5		0.00787925
52	5		0.0144411
53	5		0.0786106
54	5		0.0141609
55	5		0.0198499
56	5		0
57	5		0.00569541
1	7	0.111282	0.01211
2	7	0.0873649	0.0092726
3	7	0.103996	0.0668843
4	7	0.10037	0.028031
5	7	0.143184	0.0244217
6	7	0.0883324	0.00241112
7	7	0.140684	0.0437916
8	7	0.0546058	0.00442637
9	7	0.109346	0.0276569
10	7	0.084978	0.0698081
11	7	0.0859412	0.0112369
12	7	0.12712	0.0817921
13	7	0.132364	0.0111392
14	7	0.102657	0.0372228
15	7	0.0737093	0.00203092
16	7	0.0956805	0
17	7	0.106237	0.0119255
18	7	0.132721	0
19	7	0.0291964	0.0648297
20	7	0.0656207	0.0894379
21	7	0.0836225	0.00764202
22	7	0.0480896	0.00323778
23	7	0.0508932	0.00689364
24	7	0.0234612	0.020646
25	7	0.0408723	0
26	7	0.0588242	0.00238105
27	7	0.0773964	0.00220753
28	7	0.0763636	0
29	7	0.0456471	0.0499541
30	7	0.0547946	0.0260218
31	7	0.0639315	0.00698735
32	7	0.0597652	0.00689223
33	7	0.0956147	0.030162
34	7	0.0630292	0
35	7	0.103262	0.0199626
36	7	0.0688803	0
37	7	0.0694812	0.0198833
38	7	0.0559131	0.026714
39	7	0.0613793	0.0274588
40	7	0.0921087	0.0555725
41	7	0.107634	0.0331674
42	7	0.0359451	0.0384079
43	7	0.114191	0.0188719
44	7	0.144725	0
45	7	0.136046	0.00539222
46	7	0.0788831	0.0361014
47	7		0.0257777
48	7		0
49	7		0
50	7		0
51	7		0
52	7		0
53	7		0.00437589
54	7		0
55	7		0.0404034
56	7		0
57	7		0

## Sheet: Area over SL statistics
Mann Whitney Test	P value
Day 0 Fed vs Fasted	0.5448
Day 2 Fed vs Fasted	<0.0001
Day 5 Fed vs Fasted	<0.0001
Day 7 Fed vs Fasted	<0.0001
Day 0	Fed	Fasted
Mean	0.04548	0.04685
Std. Deviation	0.02427	0.0216
Std. Error of Mean	0.003365	0.002766
Day 2	Fed	Fasted
Mean	0.07759	0.04999
Std. Deviation	0.02827	0.02744
Std. Error of Mean	0.004123	0.003513
Day 5	Fed	Fasted
Mean	0.07288	0.02545
Std. Deviation	0.02314	0.02369
Std. Error of Mean	0.003411	0.003138
Day 7	Fed	Fasted
Mean	0.08448	0.01954
Std. Deviation	0.03182	0.02285
Std. Error of Mean	0.004692	0.003027
