# Supplementary material for: An in vivo reporter for tracking lipid droplet dynamics in transparent zebrafish
Source: eLife. 2021 Jun 11;10:e64744. doi: 10.7554/eLife.64744 (PMC8195600; doi:10.7554/eLife.64744)
Supplement: Figure 4—source data 1. [file elife-64744-fig4-data1.xlsx]

## Sheet: Diet Breakdown
	Crude Protein	Phosphorus	Fiber	Other	Crude Fat
Control Feed	58	1.4	10	18.6	12
HFD	58	1.4	2	15.6	23

## Sheet: Area (mm2)
Fish Number	Day	Control Feed	HFD
1	0	0.315313	0
2	0	0.018212	0.0111372
3	0	0	0.0899633
4	0	0	0.212712
5	0	0.0238877	0.00339452
6	0	0.0554887	0.0595386
7	0	0.283892	0
8	0	0	0
9	0	0.0568835	0.191349
10	0	0.0987226	0
11	0	0.0430827	0
12	0	0.0069907	0.024438
13	0	0	0.075066
14	0	0.0304709	0.061782
15	0	0	0.00472208
16	0	0.0378313	0.0240431
17	0	0	0.0156114
18	0	0.00991049	0
19	0	0.0272318	0.00431589
20	0	0.00953659	0.153199
21	0	0	0.120828
22	0	0.17699	0.0681599
23	0	0	0.00380963
24	0	0	0.147964
25	0	0.0662361	0.129527
26	0	0.128743	0.102645
27	0	0.269843	0.191308
28	0	0	0.0104839
29	0	0.0880561	0.0165464
30	0	0.0775637	0.0721889
31	0	0	0.126768
32	0	0.0932073	0.112462
33	0	0.137256	0.106197
34	0	0.118512	0.0308399
35	0	0.113061	0.0730749
36	0	0.0882754	0.0522928
37	0	0	0
38	0	0.0445427	0.0754359
39	0	0	0.0246842
40	0	0	0.102423
41	0	0.211647	0.126064
42	0	0.386957	0.237387
43	0	0.17616	0.213949
44	0	0.129657	0.269256
45	0	0.217831	0.157084
46	0	0.107701	0.185703
47	0	0.188223	0.115134
48	0	0.0914873	0.137195
49	0	0.250083	0.202968
50	0	0.380402	0.0733218
51	0	0.182929	0.382243
52	0	0.383975	0.320503
53	0	0.235558	0.256636
54	0	0.185677	0.398256
55	0	0.532489	0.16877
56	0	0.100107	0.236291
57	0	0.192783	0.316543
58	0	0.201949	0.0398288
59	0	0.0204554	0.227495
60	0	0.066946	0.052383
61	0	0.19987	0.296661
62	0	0.371802	0.176032
63	0	0.0453929	0.108792
64	0	0.180708	0.219972
65	0	0.263601	0.456165
66	0	0.0541427	0.23943
67	0	0.238761	0.322461
68	0	0.572698	0.267102
69	0	0.121914	0.065818
70	0	0.313495	0.0818435
71	0	0.182923	0.313384
72	0	0.18367	0.241844
73	0	0.456436	0.20304
74	0	0.237981	0.159694
75	0	0.156861	0.138885
76	0	0.2644
77	0	0.170918
78	0	0.202754
1	7	0.0591049	0.350795
2	7	0.349433	0.152077
3	7	0.147328	0.389483
4	7	0	0.312606
5	7	0.15165	0.121051
6	7	0.4094	0
7	7	0.474839	0.0224225
8	7	0.0451213	0.758018
9	7	0.0786399	0.279982
10	7	0.260118	0
11	7	0	0.069346
12	7	0.186174	0.0237512
13	7	0.0324292	0.820012
14	7	0.316817	0.564283
15	7	0.062113	0.109156
16	7	0.0794324	0.748154
17	7	0.357257	0.746765
18	7	0.50608	0.656113
19	7	0.0647658	0.137993
20	7	0.20993	0.0970098
21	7	0.168828	0.396044
22	7	0.162636	0.146401
23	7	0.223961	0.715923
24	7	0.0163535	0.330676
25	7	0.304092	0.272374
26	7	0.0421624	0.146447
27	7	0.0112442	0.115401
28	7	0.302218	0.510188
29	7	0.192934	0.175225
30	7	0.212913	0.89226
31	7	0.0147717	0.130418
32	7	0.136804	0.51445
33	7	0.532833	0.145078
34	7	0.0263207	0.230668
35	7	0.0427201	0.500437
36	7	0.273504	0.0341735
37	7	0.0896615	0.348679
38	7	0.0625043	0.230882
39	7	0.0320076	0.0192915
40	7	0.078761	0.788894
41	7	0.0403986	0.534532
42	7	0.128115	0.435228
43	7	0.102021	0.24422
44	7	0	0.233151
45	7	0.136616	0.223593
46	7	0	0.332475
47	7	0	0.150642
48	7	0.182611	0.419348
49	7	0	0.489037
50	7	0.0806286	0.244214
51	7	0.106508	0.840797
52	7	0.0363263	0
53	7	0	0.437647
54	7	0.0892336	0.547826
55	7	0.0986945	0.449631
56	7	0.157386	0.122331
57	7	0.100945	0.0368516
58	7	0.0577771	0.0753178
59	7	0.0605979	0.195424
60	7	0.0118083	0.170186
61	7		0.460777
62	7		0.143574
63	7		0.413732
64	7		0.373548
65	7		0.204554
66	7		0.199503
67	7		0.310103
68	7		0.0178389
1	14	0.122702	0.952139
2	14	0.371528	0.63349
3	14	0.110732	0.247812
4	14	0.657568	0.288683
5	14	0.589371	0.533767
6	14	0.062036	0.602092
7	14	0.588624	0.920845
8	14	0.967781	0.959419
9	14	0.182065	0.262413
10	14	0.0177968	1.09523
11	14	0.128447	0.74822
12	14	0.387511	0.478473
13	14	0.0107288	0
14	14	0.0305738	1.367
15	14	0.121886	0
16	14	0.460467	0.385605
17	14	0.177805	0.329684
18	14	0.153012	0.176032
19	14	0	0.316975
20	14	0.132133	0.0104591
21	14	0.195862	0.454988
22	14	0.0176798	0.0657184
23	14	0.491005	0.547903
24	14	0	0.307019
25	14	0	0.249537
26	14	0.316218	0.118907
27	14	0.108628	0.163682
28	14	0.108848	0.105825
29	14	0.0607995	0.342195
30	14	0.27883	0.287685
31	14	0.0125434	0.318773
32	14	0.0248557	0.141747
33	14	0.154782	0.118911
34	14	0.290057	0.232133
35	14	0.0521601	0.260775
36	14	0.0131093	0
37	14	0.136406	0.157701
38	14	0.117972	0.00815836
39	14	0.304413	0.0514082
40	14	0.181856	0.954224
41	14	0.231498	0.528912
42	14	0.144399	0.338648
43	14	0.0624974	0.661799
44	14	0.172881	0.0587706
45	14	0.0755374	0
46	14	0	0.200518
47	14	0.0138601	0.0276939
48	14	0.0908643	0.589392
49	14	0.00963275	0.0381465
50	14	0.219994	0
51	14	0.0941907	0.606504
52	14	0.348604	0.120807
53	14	0.0733198	0.124084
54	14	0.304517	0.303486
55	14	0	0.429666
56	14	0.0419845	0.0121498
57	14	0.0766808	0
58	14		0.202929
59	14		0
60	14		0.115949
61	14		0.0891567

## Sheet: Area statistics
Mann Whitney Test	P value
Day 0 Control Feed vs HFD	0.8369
Day 7 Control Feed vs HFD	<0.0001
Day 14 Control Feed vs HFD	0.0143
Day 0	Fed	Fasted
Mean	0.139501	0.132094
Std. Deviation	0.133263	0.111
Std. Error of Mean	0.015089	0.012817
Day 7	Fed	Fasted
Mean	0.135125	0.313368
Std. Deviation	0.133685	0.239113
Std. Error of Mean	0.017259	0.028997
Day 14	Fed	Fasted
Mean	0.17718	0.322037
Std. Deviation	0.193884	0.314536
Std. Error of Mean	0.025681	0.040272

## Sheet: Standard Length (mm)
Fish Number	Day	Control Feed	HFD
1	0	7.00037	4.49268
2	0	6.3088	4.6738
3	0	5.69532	7.13975
4	0	7.36812	7.54396
5	0	5.62011	5.25042
6	0	6.04014	6.33082
7	0	7.24085	7.44916
8	0	6.11827	8.42744
9	0	6.77044	7.47087
10	0	7.20936	6.50412
11	0	7.41146	6.50019
12	0	6.89421	7.09427
13	0	6.66764	6.54822
14	0	7.51298	7.07424
15	0	7.57898	6.73317
16	0	6.30899	8.07944
17	0	6.25432	7.31872
18	0	5.25448	6.45001
19	0	6.93472	5.69297
20	0	5.6982	6.49082
21	0	6.15477	6.71619
22	0	6.45029	6.55279
23	0	6.70052	6.68124
24	0	6.46598	7.12022
25	0	6.46027	5.87476
26	0	6.08681	7.11554
27	0	6.8821	7.31018
28	0	6.67356	6.09446
29	0	7.08792	7.22914
30	0	6.45592	5.89718
31	0	6.08198	6.76414
32	0	6.93856	7.71912
33	0	6.0308	6.39153
34	0	6.50256	5.64357
35	0	7.37154	6.34881
36	0	6.24968	5.08126
37	0	5.47821	4.64255
38	0	6.11451	7.39436
39	0	4.93748	7.35175
40	0	4.80032	6.77767
41	0	8.87118	6.70261
42	0	8.12168	7.3211
43	0	7.86653	7.1779
44	0	7.76243	7.23481
45	0	8.51239	6.35745
46	0	7.72262	7.20908
47	0	7.46464	6.47353
48	0	7.5016	6.70754
49	0	7.74615	6.45453
50	0	7.93789	6.77216
51	0	7.28379	6.98268
52	0	7.62454	7.09837
53	0	8.69568	6.75071
54	0	7.65776	7.5265
55	0	7.72513	7.91611
56	0	6.80411	6.58899
57	0	6.88314	6.97635
58	0	7.50624	6.90096
59	0	7.30048	7.05546
60	0	6.86493	6.6547
61	0	7.13221	7.21871
62	0	7.26153	6.61886
63	0	6.41908	7.62057
64	0	6.98337	7.62746
65	0	6.97606	7.50807
66	0	6.68034	7.68522
67	0	6.82338	7.10566
68	0	6.54133	7.37251
69	0	7.17176	7.01925
70	0	7.38371	7.01986
71	0	6.42209	6.73198
72	0	6.29728	6.70993
73	0	7.36303	7.12445
74	0	6.35984	6.92158
75	0	6.14184	6.70891
76	0	6.56303
77	0	6.31855
78	0	6.39837
1	7	6.70172	8.56732
2	7	7.80936	6.90821
3	7	7.89761	7.80932
4	7	6.44442	7.48586
5	7	7.30444	8.08191
6	7	7.25938	6.2074
7	7	8.47601	7.06709
8	7	7.11755	8.04339
9	7	7.92406	9.12077
10	7	8.67498	6.74405
11	7	6.94428	7.16239
12	7	8.28464	6.6471
13	7	5.74663	7.52195
14	7	6.24836	7.31197
15	7	6.60142	5.98221
16	7	6.6218	8.29781
17	7	7.26505	7.19926
18	7	8.22594	8.79814
19	7	6.75891	6.68366
20	7	7.49276	5.48685
21	7	7.43795	6.89419
22	7	7.20258	7.4858
23	7	6.9945	7.57481
24	7	8.55696	8.72532
25	7	8.68995	6.34892
26	7	7.88476	7.06972
27	7	7.81205	6.87014
28	7	8.9809	6.42166
29	7	9.55074	6.59989
30	7	8.39471	8.7231
31	7	7.365	8.29864
32	7	8.45406	7.13424
33	7	9.07953	7.05916
34	7	7.43585	7.81646
35	7	10.0723	8.25815
36	7	8.98872	7.45853
37	7	8.33633	8.77653
38	7	8.67142	8.44036
39	7	8.20759	7.2286
40	7	8.67381	7.69585
41	7	7.97608	7.56029
42	7	9.05108	7.2713
43	7	9.3573	8.0169
44	7	7.82726	7.30161
45	7	8.66941	7.61543
46	7	6.68952	6.87897
47	7	7.289	6.71953
48	7	7.12659	8.10561
49	7	7.11547	7.23204
50	7	7.74474	7.59496
51	7	6.87244	7.49843
52	7	6.53019	8.31168
53	7	5.80301	7.61556
54	7	7.57111	8.09949
55	7	7.44086	7.86016
56	7	8.68952	6.92269
57	7	8.28163	7.51235
58	7	7.72165	7.92349
59	7	7.42634	8.52628
60	7	8.35588	8.10462
61	7		8.65023
62	7		7.65627
63	7		7.68045
64	7		7.14297
65	7		7.41192
66	7		8.04664
67	7		8.83956
68	7		8.40954
1	14	7.86418	7.84766
2	14	9.7853	7.86225
3	14	8.17335	7.24813
4	14	9.10517	7.53769
5	14	8.73965	9.17034
6	14	8.79267	9.33501
7	14	9.55708	9.10112
8	14	10.0264	9.49041
9	14	7.90263	8.27846
10	14	8.37646	10.9718
11	14	7.30704	8.81131
12	14	7.41302	8.44358
13	14	6.88949	8.39007
14	14	7.28317	9.24807
15	14	6.59724	8.8701
16	14	7.5885	7.61757
17	14	7.47993	7.25572
18	14	7.41452	7.60564
19	14	7.11704	7.44307
20	14	8.32801	6.90922
21	14	7.04925	6.60039
22	14	6.21142	6.46618
23	14	9.85457	7.38604
24	14	7.35466	7.3424
25	14	8.35973	6.67165
26	14	8.72836	6.05086
27	14	8.884	7.52952
28	14	10.5304	7.82839
29	14	8.46857	7.35974
30	14	9.02933	7.95249
31	14	11.2737	7.29313
32	14	8.1857	7.60217
33	14	8.0711	7.46013
34	14	9.12687	7.87143
35	14	8.43243	8.19968
36	14	8.97127	10.0349
37	14	8.60743	7.71999
38	14	9.5396	10.5443
39	14	8.76719	7.07879
40	14	8.02606	9.85945
41	14	10.0634	8.25933
42	14	9.38175	8.23257
43	14	9.20438	7.34354
44	14	9.83085	7.67915
45	14	7.92593	7.53248
46	14	6.32027	7.38737
47	14	7.49194	7.01996
48	14	7.64586	7.75701
49	14	7.61923	7.85924
50	14	7.63237	8.52243
51	14	9.88646	10.2446
52	14	7.90843	8.36735
53	14	8.64689	6.97
54	14	7.29838	9.54983
55	14	8.02123	8.71041
56	14	7.77629	6.87493
57	14	8.42685	9.0943
58	14		7.90988
59	14		10.5003
60	14		7.93709
61	14		8.9715

## Sheet: Standard Length statistics
Mann Whitney Test	P value
Day 0 Control Feed vs HFD	0.7696
Day 7 Control Feed vs HFD	0.2598
Day 14 Control Feed vs HFD	0.1464
Day 0	Fed	Fasted
Mean	6.832	6.798
Std. Deviation	0.7896	0.7436
Std. Error of Mean	0.0894	0.08587
Day 7	Fed	Fasted
Mean	7.769	7.566
Std. Deviation	0.9286	0.7546
Std. Error of Mean	0.1199	0.09151
Day 14	Fed	Fasted
Mean	8.356	8.115
Std. Deviation	1.069	1.079
Std. Error of Mean	0.1416	0.1382

## Sheet: Area over Standard Length
Fish Number	Day	Control Feed	HFD
1	0	0.0450423	0
2	0	0.00288675	0.00238291
3	0	0	0.0126003
4	0	0	0.0281964
5	0	0.00425039	0.000646524
6	0	0.00918665	0.00940456
7	0	0.039207	0
8	0	0	0
9	0	0.00840173	0.0256127
10	0	0.0136937	0
11	0	0.00581299	0
12	0	0.001014	0.00344476
13	0	0	0.0114636
14	0	0.00405577	0.00873337
15	0	0	0.000701317
16	0	0.0059964	0.00297584
17	0	0	0.00213308
18	0	0.0018861	0
19	0	0.00392688	0.000758109
20	0	0.00167362	0.0236025
21	0	0	0.0179906
22	0	0.027439	0.0104017
23	0	0	0.000570198
24	0	0	0.0207808
25	0	0.0102528	0.0220481
26	0	0.0211511	0.0144254
27	0	0.0392094	0.0261701
28	0	0	0.00172023
29	0	0.0124234	0.00228884
30	0	0.0120144	0.0122413
31	0	0	0.0187412
32	0	0.0134332	0.0145693
33	0	0.0227593	0.0166153
34	0	0.0182254	0.0054646
35	0	0.0153375	0.01151
36	0	0.0141248	0.0102913
37	0	0	0
38	0	0.00728476	0.0102018
39	0	0	0.0033576
40	0	0	0.0151119
41	0	0.0238578	0.0188081
42	0	0.0476449	0.0324251
43	0	0.0223937	0.0298067
44	0	0.0167031	0.0372167
45	0	0.0255899	0.0247086
46	0	0.0139462	0.0257595
47	0	0.0252153	0.0177854
48	0	0.0121957	0.0204539
49	0	0.0322848	0.0314458
50	0	0.0479224	0.0108269
51	0	0.0251146	0.0547416
52	0	0.0503604	0.0451517
53	0	0.0270891	0.0380162
54	0	0.0242469	0.0529138
55	0	0.0689295	0.0213198
56	0	0.0147128	0.0358615
57	0	0.028008	0.0453737
58	0	0.0269041	0.00577149
59	0	0.00280192	0.0322439
60	0	0.00975189	0.00787157
61	0	0.0280236	0.0410961
62	0	0.0512016	0.0265956
63	0	0.00707156	0.0142761
64	0	0.0258768	0.0288395
65	0	0.0377865	0.0607566
66	0	0.00810479	0.0311546
67	0	0.0349916	0.0453808
68	0	0.0875507	0.0362295
69	0	0.0169991	0.00937679
70	0	0.0424577	0.0116589
71	0	0.0284833	0.0465516
72	0	0.0291665	0.0360427
73	0	0.0619903	0.028499
74	0	0.0374194	0.0230718
75	0	0.0255398	0.0207016
76	0	0.0402862
77	0	0.0270502
78	0	0.0316884
1	7	0.00881937	0.0409457
2	7	0.0447455	0.022014
3	7	0.0186548	0.0498742
4	7	0	0.0417596
5	7	0.0207613	0.0149781
6	7	0.056396	0
7	7	0.0560215	0.00317281
8	7	0.00633944	0.094241
9	7	0.0099242	0.0306972
10	7	0.0299849	0
11	7	0	0.00968197
12	7	0.0224721	0.00357316
13	7	0.00564317	0.109016
14	7	0.0507039	0.0771725
15	7	0.00940904	0.0182467
16	7	0.0119956	0.0901629
17	7	0.0491748	0.103728
18	7	0.0615224	0.074574
19	7	0.00958228	0.0206463
20	7	0.0280177	0.0176804
21	7	0.0226982	0.057446
22	7	0.0225802	0.0195572
23	7	0.0320196	0.0945137
24	7	0.00191114	0.0378985
25	7	0.0349935	0.0429008
26	7	0.00534732	0.0207148
27	7	0.00143934	0.0167974
28	7	0.0336512	0.079448
29	7	0.0202009	0.0265497
30	7	0.0253627	0.102287
31	7	0.00200567	0.0157156
32	7	0.016182	0.0721099
33	7	0.0586852	0.0205518
34	7	0.0035397	0.0295105
35	7	0.00424135	0.0605991
36	7	0.0304275	0.0045818
37	7	0.0107555	0.0397286
38	7	0.00720808	0.0273544
39	7	0.00389976	0.00266877
40	7	0.00908033	0.102509
41	7	0.00506497	0.0707026
42	7	0.0141546	0.0598557
43	7	0.0109028	0.0304632
44	7	0	0.0319315
45	7	0.0157584	0.0293605
46	7	0	0.048332
47	7	0	0.0224185
48	7	0.0256239	0.0517355
49	7	0	0.0676209
50	7	0.0104108	0.0321547
51	7	0.0154979	0.11213
52	7	0.00556283	0
53	7	0	0.0574675
54	7	0.0117861	0.067637
55	7	0.0132638	0.0572038
56	7	0.0181122	0.017671
57	7	0.012189	0.00490546
58	7	0.00748248	0.00950563
59	7	0.00815986	0.0229202
60	7	0.00141318	0.0209987
61	7		0.0532676
62	7		0.0187524
63	7		0.0538682
64	7		0.0522958
65	7		0.027598
66	7		0.0247933
67	7		0.0350813
68	7		0.00212127
1	14	0.0156027	0.121328
2	14	0.0379679	0.0805736
3	14	0.0135479	0.0341899
4	14	0.0722192	0.0382986
5	14	0.0674365	0.0582058
6	14	0.00705542	0.0644983
7	14	0.0615903	0.101179
8	14	0.0965229	0.101094
9	14	0.0230385	0.0316983
10	14	0.00212462	0.0998228
11	14	0.0175785	0.0849159
12	14	0.0522744	0.0566671
13	14	0.00155727	0
14	14	0.00419787	0.147814
15	14	0.0184753	0
16	14	0.0606796	0.0506204
17	14	0.023771	0.0454377
18	14	0.0206368	0.0231449
19	14	0	0.0425866
20	14	0.0158661	0.00151379
21	14	0.0277849	0.0689336
22	14	0.00284633	0.0101634
23	14	0.0498251	0.0741808
24	14	0	0.0418145
25	14	0	0.0374026
26	14	0.0362287	0.0196513
27	14	0.0122274	0.0217387
28	14	0.0103366	0.0135181
29	14	0.00717943	0.0464955
30	14	0.0308805	0.0361754
31	14	0.00111262	0.0437087
32	14	0.00303648	0.0186456
33	14	0.0191774	0.0159395
34	14	0.0317805	0.0294906
35	14	0.00618565	0.0318031
36	14	0.00146126	0
37	14	0.0158475	0.0204276
38	14	0.0123666	0.000773723
39	14	0.0347219	0.00726229
40	14	0.0226582	0.0967827
41	14	0.023004	0.0640382
42	14	0.0153915	0.0411351
43	14	0.00678996	0.0901198
44	14	0.0175856	0.00765327
45	14	0.00953041	0
46	14	0	0.0271433
47	14	0.00185	0.00394503
48	14	0.0118841	0.0759818
49	14	0.00126427	0.00485371
50	14	0.0288238	0
51	14	0.00952724	0.0592025
52	14	0.0440801	0.0144379
53	14	0.00847932	0.0178026
54	14	0.041724	0.0317792
55	14	0	0.0493279
56	14	0.00539904	0.00176725
57	14	0.00909959	0
58	14		0.0256551
59	14		0
60	14		0.0146086
61	14		0.00993777

## Sheet: Area over SL statistics
Mann Whitney Test	P value
Day 0 Control Feed vs HFD	0.8284
Day 7 Control Feed vs HFD	<0.0001
Day 14 Control Feed vs HFD	0.0043
Day 0	Fed	Fasted
Mean	0.01959	0.01888
Std. Deviation	0.01836	0.0154
Std. Error of Mean	0.002078	0.001779
Day 7	Fed	Fasted
Mean	0.01703	0.04086
Std. Deviation	0.01657	0.03062
Std. Error of Mean	0.00214	0.003713
Day 14	Fed	Fasted
Mean	0.02057	0.03865
Std. Deviation	0.02116	0.03468
Std. Error of Mean	0.002803	0.00444
