# Supplementary material for: An in vivo reporter for tracking lipid droplet dynamics in transparent zebrafish
Source: eLife. 2021 Jun 11;10:e64744. doi: 10.7554/eLife.64744 (PMC8195600; doi:10.7554/eLife.64744)
Supplement: Figure 5—figure supplement 1—source data 1. [file elife-64744-fig5-figsupp1-data1.xlsx]

## Sheet: Atglistatin Viability
Atglistatin	Dead %	Alive %
DMSO	0	100
1 µM	0	100
10 µM	0	100
40 µM	0	100

## Sheet: Auranofin Viability
Auranofin	Dead %	Alive %
DMSO	0	100
1 µM	0	100
2 µM	40	60
5 µM	100	0

## Sheet: JS-K Viability
JS-K	Dead %	Alive %
DMSO	0	100
1 µM	0	100
2 µM	7.69	92.31
5 µM	100	0

## Sheet: Area (mm2)
Fish Number	DMSO	1 µM	10 µM	40 µM
1	0.590952	1.07555	0.778988	0.606123
2	0.302862	0.440779	0.25875	0.839874
3	0.484066	0.344639	0.413155	0.728093
4	0.88793	0.415357	0.564708	1.28554
5	0.616152	0.422793	0.363858	0.595813
6	0.527075	0.456189	0.554175	0.444751
7	0.45525	0.301382	0.243042	1.13366
8	0.192876	0.477858	0.814527	0.854643
9	0.293064	0.448862	0.756804	1.15337
10	0.482455	0.235058	0.526832	0.637569
11	0.202778	0.281446	0.183349	0.119883
12	0.45163	0.174418	0.59186	0.51715
13	0.0684759	0.459818	0.184934	0.15722
14	0.515376	0.351243	0.729047	0.225863
15	0.368362	0.533208	0.681141	0.160259
16	0.351591	0.920072	0.276788	1.67703
17	0.303328	0.542692	0.674642	0.392567
18	0.292167	0.0333575	0.677774	0.0870372
19	0.173356	0.0526147	0.411438	0.242187
20	0.20445	0.150752	0.702275	0.490772
21	0.44769	0.546356	0.299246	0.312899
22	0.110244	0.347189	0.345788	0.441321
23	0.26803	0.604644	0.318753	0.525351
24	0.354639	0.27213	0.345977	0.541384
25	0.520642	0.535824	0.675698	0.267413
26	0.387997	0.733089	0.320133	0.600908
27	0.31734	0.286847	0.416855	0.461613
28	0.386856	0.304867	0.598514	0.429664
29	0.335998	0.666852		0.656831
30		0.375498		0.4743
31		0.539778		0.519787
32		0.36071

## Sheet: Area statistics
Dunn's multiple comparisons test	Adjusted P Value
DMSO vs. 1 µM Atglistatin	>0.9999
DMSO vs. 10 µM Atglistatin	0.1152
DMSO vs. 40 µM Atglistatin	0.0474
	DMSO	1 µM	10 µM	40 µM
Mean	0.3756	0.4279	0.4896	0.5671
Std. Deviation	0.1702	0.2206	0.1974	0.359
Std. Error of Mean	0.03161	0.039	0.03731	0.06447

## Sheet: Standard Length (mm)
Fish Number	DMSO	1 µM	10 µM	40 µM
1	8.62448	9.85957	9.43935	9.19026
2	8.25535	8.28695	8.00175	9.12931
3	8.5628	8.32663	8.89592	8.88393
4	9.87071	7.99898	8.65692	9.79854
5	9.10024	8.44233	8.49318	8.80147
6	9.95099	9.01515	9.00466	8.1208
7	9.23082	9.53237	7.65808	9.58038
8	8.01838	8.73411	9.70384	9.96106
9	7.66083	8.78885	9.30481	9.22135
10	9.40591	7.82345	8.32747	9.01508
11	6.68579	8.13311	6.55913	7.99001
12	8.57052	6.51977	8.24478	8.90453
13	6.23758	8.12245	6.23745	7.03408
14	8.72795	7.58823	9.33592	7.74426
15	7.53405	8.19589	9.17228	6.37878
16	7.02328	9.21651	7.24982	9.89653
17	7.47845	9.22456	8.53058	7.69498
18	7.54195	6.41997	8.72167	6.49305
19	7.53523	5.97907	8.03714	8.13831
20	9.51173	7.79748	9.31806	9.2171
21	8.30341	9.49493	8.44746	9.15323
22	6.35565	7.89706	8.51362	8.34233
23	6.99827	7.59006	7.6814	7.44974
24	7.90942	7.10002	7.46678	7.74082
25	7.15581	7.63253	7.60453	6.75013
26	7.79919	8.24049	6.58104	7.61027
27	7.42209	7.49315	6.37938	7.24253
28	7.73061	6.97785	6.9065	7.53089
29	8.2422	8.15984		8.06056
30		7.83549		7.37627
31		7.46142		7.35519
32		7.46001

## Sheet: Standard length statistics
Dunn's multiple comparisons test	Adjusted P Value
DMSO vs. 1 µM Atglistatin	>0.9999
DMSO vs. 10 µM Atglistatin	>0.9999
DMSO vs. 40 µM Atglistatin	>0.9999
	DMSO	1 µM	10 µM	40 µM
Mean	8.05	8.042	8.16	8.252
Std. Deviation	0.9945	0.9113	1	1.022
Std. Error of Mean	0.1847	0.1611	0.1891	0.1835

## Sheet: Area ov. Std length
Fish Number	DMSO	1 µM	10 µM	40 µM
1	0.0685203	0.109087	0.0825256	0.0659528
2	0.0366868	0.0531896	0.0323366	0.0919975
3	0.0565312	0.04139	0.0464432	0.0819562
4	0.089956	0.0519262	0.0652319	0.131197
5	0.0677072	0.0500802	0.0428412	0.0676947
6	0.0529671	0.0506026	0.0615432	0.0547669
7	0.0493184	0.0316167	0.0317366	0.118331
8	0.0240543	0.0547117	0.0839386	0.0857984
9	0.0382549	0.0510718	0.0813347	0.125076
10	0.0512928	0.0300453	0.0279532	0.0707225
11	0.0303297	0.034605	0.0717861	0.0150041
12	0.0526957	0.0267522	0.0296489	0.0580771
13	0.010978	0.0566108	0.0780905	0.0223511
14	0.059049	0.0462879	0.0742608	0.0291652
15	0.0488929	0.065058	0.0381786	0.0251238
16	0.0500608	0.0998287	0.0790851	0.169456
17	0.0405603	0.0588312	0.0777114	0.051016
18	0.0387389	0.00519589	0.0511921	0.0134047
19	0.0230061	0.00879982	0.0753671	0.0297589
20	0.0214946	0.0193334	0.0354243	0.0532458
21	0.0539164	0.0575419	0.0406159	0.0341846
22	0.0173458	0.0439643	0.0414968	0.0529014
23	0.0382994	0.0796626	0.0463355	0.0705193
24	0.0448376	0.0383281	0.0888547	0.0699388
25	0.0727579	0.0702027	0.0486447	0.039616
26	0.0497483	0.0889618	0.0653442	0.0789602
27	0.0427562	0.0382812	0.0866596	0.0637364
28	0.0500421	0.0436907		0.0570536
29	0.0407656	0.0817236		0.081487
30		0.0479227		0.0643008
31		0.0723425		0.0706694
32		0.0483525

## Sheet: Area over std length statistics
Dunn's multiple comparisons test	Adjusted P Value
DMSO vs. 1 µM Atglistatin	0.9155
DMSO vs. 10 µM Atglistatin	0.1085
DMSO vs. 40 µM Atglistatin	0.0214
	DMSO	1 µM	10 µM	40 µM
Mean	0.04557	0.05175	0.05869	0.06592
Std. Deviation	0.0173	0.02358	0.02043	0.03519
Std. Error of Mean	0.003213	0.004168	0.003933	0.006321
