# Supplementary material for: An in vivo reporter for tracking lipid droplet dynamics in transparent zebrafish
Source: eLife. 2021 Jun 11;10:e64744. doi: 10.7554/eLife.64744 (PMC8195600; doi:10.7554/eLife.64744)
Supplement: Figure 5—source data 1. [file elife-64744-fig5-data1.xlsx]

## Sheet: Ranked by DMEM0 Normalized
Plate identifier	Row	Column	Supplier identifier	Compound name	Class	Enzyme	Action	Selectivity	Description	DMEM0 Transformed Value (uM Glycerol)	DMEM0 Fold Change (Transformed value/Average of DMSO Neg Ctrl)	DMEM0 Toxicity?	A375CM Transformed Value (uM Glycerol)	A375CMFold Change (Transformed value/Average of A375CM DMSO Pos Ctrl)	A375CM Toxicity?	Batch of Adipocytes Used	A375 Fold Change/DMEM0 Fold Change	Correction Factor	DMEM0 Fold Change Normalized to Correction Factor
LOPAC Plate_03	B	12	n/a (no compound empty)	n/a (no compound empty)									294.6	1.11409		2	#DIV/0!	1.07183	0
LOPAC Plate_03	C	4	B5681	Bay 11-7085	Cell Cycle		Inhibitor	IkB-alpha	Inhibits cytokine induced IkB (Inhibitor of NFkB) phosphorylation	18.01	0.157585		234.26	0.885906		2	5.62175	0.820637	0.192028
LOPAC Plate_03	D	6	G6423	Gemcitabine hydrochloride	Apoptosis and Cell Cycle				Gemcitabine is a widely used antitumor agents in both clinics and research labs. It is an antineoplastic agent and antimetabolite	35.757	0.312869		205.865	0.778523		2	2.48834	0.73977	0.422928
LOPAC Plate_14	A	7	A6733	Auranofin	Phosphrylation	Enzyme	Inhibitor		Inhibits the release of inflammatory mediators from human macrophages, basophils, and pulmonary mast cells. Inhibits 5-lipoxygenase in human neutrophils. Is a potent inhibitor of selenoenzyme thioredoxin reductase (TrxR). Auranofin inhibits IKB kin…	103.937	0.495237		223.866	0.662722		3	1.33819	1.15832	0.427546
LOPAC Plate_12	F	8	M4699	MTEP hydrochloride	Excitatory Amino Acids		Antagonist	mGluR5	MTEP is a potent and highly selective antagonist for mGluR5.	147.267	0.379976		342.297	0.844178		3	2.22166	0.871692	0.435906
LOPAC Plate_03	D	1	n/a (no compound empty)	n/a (no compound empty)						53.504	0.468153		131.591	0.497639		2	1.06298	1.06674	0.438862
LOPAC Plate_08	F	6	J4137	JS-K	Nitric Oxide		Donor		Nitric oxide donor; antiproliferative	102.262	0.425887		342.411	0.876248		3	2.05747	0.905265	0.470455
LOPAC Plate_05	B	9	D3768	Dequalinium chloride hydrate	K+ Channel		Blocker		Selective blocker of apamin-sensitive K+ channels	60.4502	0.510128		98.3584	0.647947		2	1.27017	1.07663	0.473819
LOPAC Plate_12	H	11	P6628	Pilocarpine nitrate	Cholinergic		Agonist	Muscarinic	Nonselective muscarinic acetylcholine receptor agonist	214.931	0.55456		358.218	0.883442		3	1.59305	1.16212	0.477197
LOPAC Plate_08	G	10	N1786	NSC 95397	Phosphorylation	Enzyme	Inhibitor	Cdc25	Selective, irreversible Cdc25 dual specificity phosphatase inhibitor.	120.05	0.499966		329.071	0.842108		3	1.68433	0.991884	0.504057
LOPAC Plate_14	G	9	S5890	Sanguinarine chloride	Ion Pump		Inhibitor	Na+/K+ ATPase	Inhibitor of Mg2+ and Na+/K+-ATPase; isolated from the leaves and stems of Macleaya cordata and microcarpa	95.942	0.457142		91.9448	0.27219		3	0.595416	0.89631	0.510026
LOPAC Plate_13	F	9	B5556	Bay 11-7082	Phosphorylation		Inhibitor	IKB-alpha	Inhibitor of cytokine-induced IKB-alpha phosphorylation	112.041	0.508955		316.454	0.88707		3	1.74292	0.985829	0.516271
LOPAC Plate_04	H	3	C4238	CNS-1102	Glutamate		Antagonist	NMDA	Noncompetitive NMDA glutamate receptor antagonist.	124.573	0.600743		426.403	1.22284		2	2.03554	1.1579	0.51882
LOPAC Plate_01	G	11	A7148	4-Aminobenzamidine dihydrochloride	Biochemistry	Enzyme	Inhibitor	Trypsin	Trypsin inhibitor; competitive kallikrein inhibitor	123.11	0.595937		171.608	0.904197		Batch 1	1.51727	1.14025	0.522635
LOPAC Plate_03	D	3	B4555	Benazoline oxalate	Imidazoline		Agonist	I2	I2 Imidazoline receptor agonist	53.504	0.468153		255.557	0.966443		2	2.06437	0.895008	0.523071
LOPAC Plate_07	H	3	E7881	Emodin	Phosphorylation	Enzyme	Inhibitor	p56lck TK	p56lck Tyrosine kinase inhibitor	111.009	0.611249		175.665	0.740215		2	1.21099	1.1579	0.527893
LOPAC Plate_01	F	3	A0382	Atropine methyl nitrate	Cholinergic		Antagonist	Muscarinic	Muscarinic acetylcholine receptor antagonist	111.918	0.541761		197.722	1.04179		Batch 1	1.92298	0.971114	0.557875
LOPAC Plate_12	G	11	P6503	(+)-Pilocarpine hydrochloride	Cholinergic		Agonist	Muscarinic	Cholinergic receptor agonist	214.931	0.55456		346.277	0.853994		3	1.53995	0.988289	0.561131
LOPAC Plate_03	D	4	B5683	Betaxolol hydrochloride	Adrenoceptor		Antagonist	beta1	Selective beta1 adrenoceptor antagonist	53.504	0.468153		237.81	0.899329		2	1.92102	0.832725	0.562194
LOPAC Plate_01	E	6	A3085	5-(N-Ethyl-N-isopropyl)amiloride	Ion Pump		Blocker	Na+/H+ Antiporter	Selective blocker of Na+/H+ antiport	104.457	0.505643		164.146	0.864884		Batch 1	1.71046	0.893295	0.566043
LOPAC Plate_11	A	8	PZ0111	PD-407824	Kinase	Enzyme	Inhibitor	Wee1/Chk1	PD-407824 is a Wee1/Chk1 inhibitor	222.891	0.601342		449.763	0.997794		3	1.65928	1.05534	0.569811
LOPAC Plate_01	C	3	861804	TMB-8 hydrochloride	Intracellular Calcium		Antagonist		Intracellular Ca2+ antagonist; inhibits calmodulin-sensitive Ca2+-ATPase activity; protein kinase C inhibitor	119.379	0.577878		175.338	0.923854		Batch 1	1.5987	1.01332	0.570281
LOPAC Plate_10	E	6	M3184	MG 624	Cholinergic		Antagonist	Nicotinic	Nicotinic acetylcholine receptor antagonist; selectively inhibits alpha-bungarotoxin sensitive receptors that contain the alpha7 subunit	184.179	0.61801		398.717	0.871685		3	1.41047	1.07884	0.57285
LOPAC Plate_01	G	4	A0966	4-Amino-1,8-naphthalimide	Apoptosis	Enzyme	Inhibitor	PARP	Poly(ADP-ribose) polymerase (PARP) inhibitor	104.457	0.505643		171.608	0.904197		Batch 1	1.78821	0.881523	0.573602
LOPAC Plate_16	F	10	S4568	SCH 58261	Purinoceptor		Antagonist	alpha2A	A2A adenosine receptor antagonist.	104.179	0.58243		218.177	0.8147		3	1.3988	1.01319	0.574849
LOPAC Plate_03	C	11	B6311	BTO-1	Phosphorylation	Enzyme	Inhibitor	Plk	Polo-like kinase (Plk) inhibitor.	57.0534	0.49921		198.766	0.751678		2	1.50574	0.863641	0.578029
LOPAC Plate_01	E	3	A0257	Atropine sulfate	Cholinergic		Antagonist	Muscarinic	Muscarinic acetylcholine receptor antagonist	119.379	0.577878		164.146	0.864884		Batch 1	1.49666	0.988412	0.584653
LOPAC Plate_03	H	9	C0768	Cyclophosphamide monohydrate	DNA		Intercalator		Cancer chemotherapeutic; cross-links DNA	81.8992	0.716607		319.446	1.20805		2	1.6858	1.2054	0.594496
LOPAC Plate_05	F	4	C191	Capsazepine	Vanilloid		Agonist		Synthetic analog of capsaicin that acts as a specific vanilloid receptor antagonist	60.4502	0.510128		73.7688	0.48596		2	0.952624	0.846552	0.602596
LOPAC Plate_01	E	4	PZ0192	Bosutinib	kinase	Enzyme	Inhibitor	Src/Abl	Bosutinib (SKI-606) is an orally active; dual Src/Abl tyrosine kinase inhibitor with potent antiproliferative activity.	93.265	0.451467	Possibly	96.9956	0.511068		Batch 1	1.13202	0.742456	0.608073
LOPAC Plate_06	H	5	D9815	Doxazosin mesylate	Adrenoceptor		Blocker	alpha1	alpha1 adrenoceptor blocker	183.948	0.618121		247.47	0.748		2	1.21012	1.00746	0.613545
LOPAC Plate_01	E	7	F3680	10058-F4	Apoptosis	Enzyme	Inhibitor	c-Myc	Inhibits c-Myc-Max interaction and prevents transactivation of c-Myc target gene expression.	96.9956	0.469526		134.302	0.707633		Batch 1	1.50712	0.763061	0.615319
LOPAC Plate_01	H	4	R0875	Reserpine	Serotonin		Inhibitor	Uptake	Inhibits vesicular catecholine and serotonin uptake.	138.032	0.668172		231.297	1.2187		Batch 1	1.82393	1.0854	0.6156
LOPAC Plate_04	F	6	D8696	DMH4	Kinase/Phosphotase	Enzyme	inhibitor	VEGF	DMH4 is a potent VEGF inhibitor and an angiogenesis inhbitor	106.072	0.511524		263.594	0.755937		2	1.47781	0.830771	0.615722
LOPAC Plate_12	A	8	P1918	Pancuronium bromide	Cholinergic		Antagonist		Aminosteroidal neuromuscular blocking agent; skeletal muscle relaxant	254.733	0.657256		318.416	0.785282		3	1.19479	1.05534	0.622793
LOPAC Plate_08	D	2	SML0660	GSK2578215A	Phosphorylation	Enzyme	Inhibitor	LRRK2	GSK2578215A is a potent inhibitor of leucine-rich repeat kinase-2 (LRRK2).	155.625	0.648124		311.283	0.796589		3	1.22907	1.04016	0.623102
LOPAC Plate_01	H	3	A0430	1-Aminocyclopropanecarboxylic acid hydrochloride	Glutamate		Agonist	NMDA-Glycine	NMDA glutamate receptor agonist acting at the glycine site	149.224	0.722348		235.028	1.23836		Batch 1	1.71435	1.1579	0.623841
LOPAC Plate_12	F	11	P6500	Pentylenetetrazole	Neurotransmission		Modulator	CNS	Non-specific CNS stimulant; convulsant	246.772	0.636717		350.258	0.86381		3	1.35666	1.01944	0.624573
LOPAC Plate_04	H	6	C6019	Clotrimazole	K+ Channel		Inhibitor	Ca2+-activated K+ channel	Specific inhibitor of Ca2+-activated K+ channels	135.674	0.654275		400.502	1.14856		2	1.75547	1.04009	0.629053
LOPAC Plate_03	D	2	B2377	N-Bromoacetamide	Na+ Channel		Modulator		Removes fast inactivation of Na+ currents and transient K+ currents; chemical modifier	64.1522	0.561323		252.007	0.95302		2	1.69781	0.890975	0.63001
LOPAC Plate_04	C	10	C8221	Caffeic acid phenethyl ester	Cell Cycle		Inhibitor	NFkB	NFkB inhibitor	113.473	0.547212		193.29	0.554319		2	1.01299	0.864173	0.63322
LOPAC Plate_04	F	2	SML0550	Nestorone	Lipid Signaling		Agonist	Progesterone receptor	Potent progesterone receptor agonist with no androgenic, estrogenic, or glucocorticoid-like activities.	135.674	0.654275		322.797	0.92572		2	1.41488	1.02507	0.638272
LOPAC Plate_12	A	1	n/a (no compound empty)	n/a (no compound empty)						270.654	0.698335		509.466	1.25645		3	1.79921	1.08475	0.643776
LOPAC Plate_01	F	5	A1895	Aurintricarboxylic acid	Apoptosis	Enzyme	Inhibitor	TopoII	DNA topoisomerase II inhibitor	111.918	0.541761		175.338	0.923854		Batch 1	1.70528	0.838028	0.646471
LOPAC Plate_07	H	2	G9797	GW9508	Lipids		Agonist	FFA1/GPR40	GW9508 is a selective FFA1/GPR40 agonist	136.302	0.75052		163.019	0.686925		2	0.915265	1.15899	0.647562
LOPAC Plate_05	C	9	D3775	Doxylamine succinate	Histamine		Antagonist	H1	H1 Histamine receptor antagonist	75.8187	0.63982		129.095	0.850431		2	1.32917	0.987921	0.647643
LOPAC Plate_01	D	5	A1784	Aminopterin	Antibiotic	Enzyme	Inhibitor	Dihydrofolate reductase	Dihydrofolate reductase inhibitor	123.11	0.595937		179.069	0.94351		Batch 1	1.58324	0.919107	0.648387
LOPAC Plate_16	C	11	Y102	YC-1	Cyclic Nucleotides	Enzyme	Activator	Guanylyl cyclase	NO-independent guanylyl cyclase activator	123.835	0.692317		229.97	0.858738		3	1.24038	1.06285	0.651377
LOPAC Plate_07	H	10	SML0527	Epalrestat	Cell Stress	Enzyme	Inhibitor	Aldose reductase	Aldose Reductase (AR) inhibitor.	127.871	0.704097		234.683	0.988899		2	1.40449	1.07252	0.656489
LOPAC Plate_09	H	8	L2037	beta-Lapachone	Apoptosis		Activator		Induces apoptosis in HL-60 cells; anticancer agent	188.227	0.600981		313.721	0.746096		3	1.24146	0.913333	0.658009
LOPAC Plate_05	C	7	D1414	Droperidol	Dopamine		Antagonist	D1/D2	D1, D2 dopamine receptor antagonist	72.745	0.613882		101.432	0.668196		2	1.08848	0.930369	0.659826
LOPAC Plate_01	C	4	A0760	L-azetidine-2-carboxylic acid	Biochemistry		Inhibitor	Collagen	Inhibits collagen synthesis	111.918	0.541761		208.914	1.10076		Batch 1	2.03182	0.820637	0.660171
LOPAC Plate_04	E	8	C7230	N-(2-[4-(4-Chlorophenyl)piperazin-1-yl]ethyl)-3-methoxybenzamide	Dopamine		Agonist	D4	Selective D4 dopamine receptor agonist	106.072	0.511524		245.093	0.702879		2	1.37409	0.77167	0.662879
LOPAC Plate_12	E	4	O2881	Oxybutynin Chloride	Cholinergic		Antagonist	Muscarinic	Muscarinic acetylcholine receptor antagonist	234.832	0.605908		326.376	0.804914		3	1.32844	0.912084	0.664312
LOPAC Plate_07	C	2	E5156	Epinastine hydrochloride	Histamine		Antagonist	H1	Non-sedating H1 histamine receptor antagonist.	111.009	0.611249		133.51	0.562583		2	0.920382	0.906539	0.674267
LOPAC Plate_01	E	9	A8001	Aconitine	Ion Pump		Blocker	Na+/H+ Antiporter	Neurotoxin. Activates tetrodotoxin-sensitive Na+ channels. Aconitine also blocks norepinephrine reuptake	126.84	0.613995		179.069	0.94351		Batch 1	1.53667	0.910595	0.67428
LOPAC Plate_08	G	11	I2279	IMID-4F hydrochloride	K+ Channel		Blocker		Imidazoline-based K(ATP) channel blocker	160.072	0.666644		360.199	0.921767		3	1.3827	0.988289	0.674543
LOPAC Plate_04	A	3	C3662	Cyclosporin A	Phosphorylation	Enzyme	Inhibitor	Calcineurin phosphatase	Calcineurin phosphatase inhibitor; immunosuppressant	135.674	0.654275		293.196	0.840828		2	1.28513	0.969573	0.674808
LOPAC Plate_01	E	8	PZ0004	Varenicline tartrate	Cholinergics		Agonist	a4ß2 receptors	Varenicline tartrate is a partial a4ß2 nicotinic receptor agonist and a7 full agonist. Varenicline competitively binds to a4ß2 receptors and partially stimulates without creating a full nicotine effect, while simultaneoudly blocking the ability of nic...	108.187	0.523702		167.877	0.884541		Batch 1	1.68902	0.77167	0.67866
LOPAC Plate_01	G	9	T3955	TNP	Ion Channels	Enzyme	Inhibitor	IP3K	TNP is a potent and selective IP6K inhibitor; less selective inhibitor of IP3K.	119.379	0.577878		126.84	0.66832		Batch 1	1.15651	0.850024	0.679837
LOPAC Plate_03	D	8	B169	BRL 37344 sodium	Adrenoceptor		Agonist	beta3	Selective beta3 adrenoceptor agonist	60.6028	0.530266		166.822	0.630872		2	1.18973	0.779857	0.679953
LOPAC Plate_07	G	6	F4646	p-Fluoro-L-phenylalanine	Neurotransmission	Enzyme	Substrate	Tyrosine Hydroxylase	Substrate for tyrosine hydroxylase; arrests cells at G2	115.224	0.634461		171.45	0.722451		2	1.13868	0.932068	0.680703
LOPAC Plate_07	E	6	F4303	Fiduxosin hydrochloride	Adrenoceptor		Antagonist	alpha1	alpha1-Adrenoceptor antagonist	111.009	0.611249		184.096	0.775741		2	1.26911	0.893295	0.684263
LOPAC Plate_02	A	1	n/a (no compound empty)	n/a (no compound empty)						147.737	0.859721		154.51	0.611973		Batch 1	0.711828	1.25613	0.684421
LOPAC Plate_10	E	3	M0763	Metoclopramide hydrochloride	Dopamine		Antagonist	D2	5-HT3 Serotonin receptor antagonist; D2 dopamine receptor antagonist; anti-emetic	220.611	0.740254		418.957	0.915933		3	1.23732	1.07789	0.686765
LOPAC Plate_01	B	3	PZ0162	PD 0325901	Kinase phosphotase biology	Enzyme	Inhibitor	MKK1(MEK1) & MKK2 (MEK2)	PD 0325901 is a potent MKK1 (MEK1) and MKK2 (MEK2) inhibitor	149.224	0.722348		182.799	0.963167		Batch 1	1.33338	1.04928	0.688422
LOPAC Plate_01	E	5	A1824	N-Acetyl-5-hydroxytryptamine	Melatonin		Precursor		Immediate precursor of melatonin	115.649	0.559819		167.877	0.884541		Batch 1	1.58005	0.811428	0.689918
LOPAC Plate_07	H	4	E100	(-)-Eseroline fumarate	Cholinergic	Enzyme	Inhibitor	Cholinesterase	Metabolite of physostigmine (eserine); potent analgesic; cholinesterase inhibitor	136.302	0.75052		196.743	0.82903		2	1.10461	1.0854	0.69147
LOPAC Plate_14	C	7	PZ0103	CP-346086 dihydrate	Lipids	Enzyme	Inhibitor	triglyceride transfer protein	CP-346086 is microsomal triglyceride transfer protein inhibitor	135.918	0.647618		291.825	0.863906		3	1.33397	0.936399	0.691605
LOPAC Plate_07	H	11	SML0634	CID2858522	Gene Regulation	Enzyme	Inhibitor	NF-kB	CID2858522 specifically inhibits NF-kB activation downstream of protein kinsase C (PKC).	136.302	0.75052		272.622	1.14877		2	1.53063	1.08268	0.693204
LOPAC Plate_06	F	2	SML0601	BPTES	Oxidative Stress	Enzyme	Inhibitor	GLS1	Selective inhibitor of Glutaminase GLS1.	211.739	0.711506		267.32	0.808		2	1.13562	1.02507	0.694104
LOPAC Plate_01	F	6	A3134	3-Aminopropionitrile fumarate	Multi-Drug Resistance	Enzyme	Substrate	CYP450	Transformed to cyanide by cytochrome P450 in liver	119.379	0.577878		182.799	0.963167		Batch 1	1.66673	0.830771	0.695593
LOPAC Plate_04	G	2	C3412	Cyproterone acetate	Hormone		Antagonist	Androgen	Androgen antagonist; synthetic steroid	135.674	0.654275		333.898	0.957554		2	1.46353	0.939034	0.696754
LOPAC Plate_02	B	11	S5192	SB 222200	Tachykinin		Antagonist	NK3	Non-peptide NK3 tachykinin receptor antagonist.	107.138	0.623462		155.632	0.616415		Batch 1	0.988698	0.893464	0.697803
LOPAC Plate_04	A	5	C4895	Cephalexin hydrate	Antibiotic			Cell wall synthesis	Semi-synthetic cephalosporin antibiotic; interferes with cell wall synthesis	146.775	0.707807		296.896	0.85144		2	1.20293	1.01206	0.699375
LOPAC Plate_01	C	5	SML0511	GNF-5	Phosphorylation	Enzyme	Inibitor	BRC-Abl	GNF-5 is a BRC-Abl inhibitor.	115.649	0.559819		179.069	0.94351		Batch 1	1.68538	0.799787	0.699961
LOPAC Plate_02	G	11	PZ0005	Voriconazole	Immunomodulators	Enzyme	Inhibitor	CYP450-dependent 14-a sterol demethylase	Voriconazole inhibits ergosterol synthesis by inhibiting CYP450-dependent 14-a sterol demethylase resulting in a depletion of ergosterol in fungal cell membranes	137.588	0.800656		219.915	0.871022		Batch 1	1.08788	1.14025	0.702173
LOPAC Plate_01	F	11	A7127	Agmatine sulfate	Imidazoline		Agonist		Endogenous agonist at imidazoline receptors; may act as a neurotransmitter	141.763	0.68623		164.146	0.864884		Batch 1	1.26034	0.97573	0.703299
LOPAC Plate_06	B	3	D7802	Daidzein	Cell Cycle	Enzyme	Inhibitor	Aldehyde dehydrogenase	Isoflavonoid cytostatic agent that arrests the cell cycle at G1; inhibitor of mitochondrial aldehyde dehydrogenase	219.679	0.738188		307.021	0.928		2	1.25713	1.04928	0.703519
LOPAC Plate_06	G	5	D9766	Dipyridamole	Adenosine		Inhibitor		Coronary vasodilator; adenosine transport inhibitor	227.619	0.764869		314.961	0.952		2	1.24466	1.08632	0.704094
LOPAC Plate_06	E	6	SML0594	CGP 55845 hydrochloride	GABA		Antagonist	GABA-B	Potent selective GABA-B receptor antagonist.	187.918	0.631462		275.26	0.832		2	1.31758	0.893295	0.70689
LOPAC Plate_05	F	11	C0494	Cambinol	Gene Regulation	Enzyme	Inhibitor	SIRT1/2	Sirtuin (Human Silent Information Regulator) Type 1/2 Inhibitor.	81.9661	0.691697		98.3584	0.647947		2	0.93675	0.97573	0.708902
LOPAC Plate_12	E	11	P6402	Perphenazine	Dopamine		Antagonist	D2	D2 dopamine receptor antagonist; sigma receptor agonist; phenothiazine antipsychotic	278.614	0.718874		437.822	1.07976		3	1.50202	1.01263	0.70991
LOPAC Plate_03	D	5	B8262	Benztropine mesylate	Cholinergic		Antagonist	Muscarinic	Muscarinic acetylcholine receptor antagonist	74.8004	0.654494		216.513	0.818792		2	1.25103	0.919107	0.712098
LOPAC Plate_06	H	7	D103	(±)-2,3-Dichloro-alpha-methylbenzylamine hydrochloride	Neurotransmission	Enzyme	Inhibitor	PNMT	Inhibitor of phenylethanolamine N-methyltransferase (PNMT); alpha2 adrenoceptor blocker	235.559	0.791551		330.842	1		2	1.26334	1.11053	0.712766
LOPAC Plate_08	F	10	C3118	CPNQ	Neurotransmission		Neuroprotectant		Prevents huntingtin-mediated proteosome dysfunction and reduces alpha-synuclein-mediated toxicity; promotes inclusion formation in cellular models of Huntington's and Parkinson's disease.	173.413	0.722203		377.986	0.967286		3	1.33935	1.01319	0.712804
LOPAC Plate_13	H	11	R0500	Cortexolone	Hormone		Precursor	Cortisol	Precursor of cortisol biosynthesis	182.801	0.830386		351.833	0.986246		3	1.1877	1.16212	0.714544
LOPAC Plate_06	G	11	E2387	5'-N-Ethylcarboxamidoadenosine	Adenosine		Agonist	A1/A2	Potent adenosine receptor agonist with equal affinity at A1 and A2 receptors	243.499	0.818232		307.021	0.928		2	1.13415	1.14025	0.717588
LOPAC Plate_01	B	5	A1755	Aminophylline ethylenediamine	Adenosine		Antagonist	A1/A2	A1/A2 adenosine receptor antagonist; diuretic; cardiac stimulant; smooth muscle relaxant	152.955	0.740406		182.799	0.963167		Batch 1	1.30086	1.03125	0.717972
LOPAC Plate_01	C	7	A3711	AA-861	Leukotriene	Enzyme	Inhibitor	5-lipoxygenase	5-lipoxygenase inhibitor	138.032	0.668172		167.877	0.884541		Batch 1	1.32382	0.930369	0.718179
LOPAC Plate_06	C	7	I9532	Icilin	Neurotransmission		Agonist	CMR1	Potent agonist at the CMR1 cold- and menthol-sensitive receptor.	199.828	0.671484		247.47	0.748		2	1.11395	0.930369	0.72174
LOPAC Plate_01	F	2	246379	Azelaic acid	DNA Metabolism	Enzyme	Inhibitor		Antiproliferative on melonama cells; inhibits mitochondrial oxidoreductases of the respiratory chain and inhibits DNA synthesis	152.955	0.740406		231.297	1.2187		Batch 1	1.64599	1.02507	0.722297
LOPAC Plate_08	B	11	SML0130	Loxiglumide	Cholinergics		Antagonist	CCKA	Loxiglumide is a small-molecule antagonist of the cholecystokinin receptor CCKA	186.753	0.777763		373.54	0.955907		3	1.22905	1.07452	0.723826
LOPAC Plate_12	E	3	SML0518	NSC405020	Extracellular Matrix	Enzyme	Inhibitor	MT1-MMP	NSC405020 is a PEX inhibitor targeting the PEX domain of MT1-MMP	302.495	0.780492		322.396	0.795098		3	1.01871	1.07789	0.724095
LOPAC Plate_11	E	8	G8761	Gossypol	Apoptosis		Inducer		Natural product from cotton seeds with a variety of cell biological activities. Proapoptotic, antimalarial, PKC inhibition.	266.673	0.719463		390.06	0.865343		3	1.20276	0.993333	0.724292
LOPAC Plate_12	A	4	O0886	Olomoucine	Phosphorylation	Enzyme	Inhibitor	PK	Potent and selective inhibitor of cdc2, cdk and cyclin-dependent kinases	298.515	0.770222		330.357	0.81473		3	1.05779	1.06219	0.725125
LOPAC Plate_05	A	8	D2521	Diltiazem hydrochloride	Ca2+ Channel		Antagonist	L-type	Ca2+ channel antagonist selective for slow, or L-type, channels; stimulates 1,4-dihydropyridine binding to Ca2+ channels; coronary vasodilator	94.2609	0.795451		113.727	0.749189		2	0.941842	1.09661	0.72537
LOPAC Plate_04	H	10	D6321	Droxinostat	Gene Regulation	Enzyme	Inhibitor	HDAC3, HDAC6, and HDAC8	Droxinostat is a selective inhibitor of HDAC3, HDAC6, and HDAC8. Droxinostat is a selective inhibitor of HDAC3, HDAC6, and HDAC8	161.575	0.779182		444.904	1.2759		2	1.63748	1.07252	0.726497
LOPAC Plate_05	A	9	D3689	(S)-3,5-Dihydroxyphenylglycine	Glutamate		Agonist	mGluR1	Group I metabotropic glutamate receptor (mGluR1) agonist	97.3346	0.821389		119.874	0.789686		2	0.961403	1.129	0.727535
LOPAC Plate_06	G	8	E2031	Eliprodil	Glutamate		Antagonist	NMDA-polyamine	NR2B selective NMDA receptor antagonist (polyamine site); potential clinical use to treat both acute and chronic pain.	187.918	0.631462		283.2	0.856		2	1.35558	0.864651	0.730309
LOPAC Plate_11	H	5	S5321	S15535	Serotonin		Agonist	5-HT1A	Potent, orally active, partial 5-HT1A receptor agonist.	266.673	0.719463		382.099	0.847683		3	1.17822	0.982953	0.731941
LOPAC Plate_05	H	4	C197	8-(3-Chlorostyryl)caffeine	Adenosine		Antagonist	A2A	Selective A2A adenosine receptor antagonist	94.2609	0.795451		129.095	0.850431		2	1.06912	1.0854	0.732865
LOPAC Plate_01	G	1	n/a (no compound empty)	n/a (no compound empty)						182.799	0.884876		156.685	0.825571	Edge effect	Batch 1	0.93298	1.20739	0.732882
LOPAC Plate_03	G	9	C0750	Caffeine	Adenosine	Enzyme	Inhibitor	Phosphodiesterase	Phosphodiesterase inhibitor; central stimulant	71.251	0.623437		237.81	0.899329		2	1.44253	0.850024	0.733434
LOPAC Plate_05	B	6	D0411	WB-4101 hydrochloride	Adrenoceptor		Antagonist	alpha1A	alpha1A Adrenoceptor antagonist	78.8924	0.665759		129.095	0.850431		2	1.27739	0.907424	0.73368
LOPAC Plate_04	G	5	C5259	Bethanechol chloride	Cholinergic		Agonist	Muscarinic	Muscarinic acetylcholine receptor agonist; resistant to acetylcholinesterase and non-specific cholinesterases	165.276	0.797026		307.997	0.883274		2	1.10821	1.08632	0.733696
LOPAC Plate_06	H	9	B6813	Benidipine hydrochloride	Ion Channel		Blocker	Calcium	Calcium Channel Blocker	263.35	0.884936		338.782	1.024		2	1.15715	1.2054	0.734142
LOPAC Plate_04	H	4	C4662	Carbetapentane citrate	Opioid		Ligand	sigma1	Opioid receptor ligand with high affinity toward sigma1 sites; antitussive	165.276	0.797026		389.401	1.11673		2	1.40112	1.0854	0.734316
LOPAC Plate_10	E	1	n/a (no compound empty)	n/a (no compound empty)						240.85	0.808167		394.67	0.862837		3	1.06765	1.09737	0.736461
LOPAC Plate_07	B	3	E3876	N-Ethylmaleimide	Biochemistry	Enzyme	Inhibitor	Isocitrate dehydrogenase	Sulfhydryl alkylating agent that inactivates NADP-dependent isocitrate dehydrogenase and many endonucleases	140.517	0.773732		141.942	0.598109		2	0.773018	1.04928	0.737394
LOPAC Plate_04	B	5	C4911	Chlorothiazide	Biochemistry	Enzyme	Inhibitor	Carbonic anhydrase	Carbonic anhydrase inhibitor; diuretic; antihypertensive	157.875	0.761338		252.494	0.724102		2	0.951091	1.03125	0.73827
LOPAC Plate_04	A	7	C6022	Cyproheptadine hydrochloride	Serotonin		Antagonist	5-HT2	5-HT2 serotonin receptor antagonist	143.074	0.689963		337.598	0.968166		2	1.40321	0.929653	0.742172
LOPAC Plate_12	A	9	SML0698	CID 11210285 hydrochloride	Gene Regulation	Enzyme	Agonist	Wnt	CID 11210285 is a cell-permeable, potent and selective activator of Wnt signaling without inhibiting GSK-3ß.	330.357	0.852379		314.436	0.775466		3	0.909766	1.14831	0.742288
LOPAC Plate_07	H	6	F4765	Fluphenazine dihydrochloride	Dopamine		Antagonist	D1/D2	Dopamine receptor antagonist; antipsychotic	140.517	0.773732		230.467	0.971136		2	1.25513	1.04009	0.743905
LOPAC Plate_11	F	1	n/a (no compound empty)	n/a (no compound empty)						270.654	0.730202		382.099	0.847683		3	1.16089	0.979213	0.745702
LOPAC Plate_08	B	2	G007	Guvacine hydrochloride	GABA		Inhibitor	Uptake	GABA uptake inhibitor	168.966	0.703683		355.752	0.910387		3	1.29375	0.943127	0.746118
LOPAC Plate_05	B	5	C203	2-Chloro-2-deoxy-D-glucose	Biochemistry		Analog	Glucose	Analog of 2-fluoro-2-deoxyglucose	91.1872	0.769512		129.095	0.850431		2	1.10516	1.03125	0.746196
LOPAC Plate_14	A	9	S7947	Stattic	Gene Regulation	Enzyme	Inhibitor	STAT3	Irreversible STAT3 activation inhibitor.	179.892	0.857143		143.914	0.426036		3	0.497042	1.14831	0.746436
LOPAC Plate_04	A	2	SML0551	Icaritin	PPAR		Modulator		Enhances osteoblastic differentiation of mesenchymal stem cells (MSCs) while it inhibits adipogenic differentiation of MSCs by inhibiting PPAR-gamma pathway.	176.376	0.850558		356.099	1.02122		2	1.20065	1.13942	0.74648
LOPAC Plate_12	F	4	O3011	Oxiracetam	Nootropic				Nootropic agent, improves learning and memory, and prevents impairment of cognitive functions	266.673	0.688065		362.198	0.893258		3	1.29822	0.921165	0.746951
LOPAC Plate_04	F	3	C4024	Carbamazepine	Anticonvulsant				Analgesic; anticonvulsant	150.475	0.725651		296.896	0.85144		2	1.17335	0.971114	0.747235
LOPAC Plate_13	B	2	P6777	Phenelzine sulfate	Neurotransmission	Enzyme	Inhibitor	MAO-A/B	Non-selective MAO-A/B inhibitor	155.284	0.705385		332.178	0.931148		3	1.32006	0.943127	0.747922
LOPAC Plate_01	G	5	A1910	(±)-2-Amino-4-phosphonobutyric acid	Glutamate		Antagonist	NMDA	NMDA glutamate receptor antagonist	167.877	0.812641		179.069	0.94351		Batch 1	1.16104	1.08632	0.74807
LOPAC Plate_10	E	7	M3935	Meloxicam sodium	Prostaglandin	Enzyme	Inhibitor	COX-2	Non-steroidal anti-inflammatory drug (NSAID) that shows 300-fold selectivity for cyclooxygenase-2 (COX-2) vs. cyclooxygenase-1 (COX-1).	204.419	0.685924		402.765	0.880534		3	1.28372	0.916112	0.748733
LOPAC Plate_01	H	9	A5879	2-(2-Aminoethyl)isothiourea dihydrobromide	Nitric Oxide	Enzyme	Inhibitor	NOS	Inhibits constitutive and inducible nitric oxide synthase (NOS)	186.53	0.902935		249.95	1.31698		Batch 1	1.45856	1.2054	0.749073
LOPAC Plate_08	A	4	H1377	MHPG piperazine	Adrenoceptor		Metabolite		Norepinephrine metabolite	191.2	0.796282		413.562	1.05833		3	1.32908	1.06219	0.749659
LOPAC Plate_04	H	7	C6645	Cytosine-1-beta-D-arabinofuranoside hydrochloride	DNA Metabolism		Inhibitor		Selective inhibitor of DNA synthesis	172.676	0.832714		411.602	1.18039		2	1.41753	1.11053	0.749832
LOPAC Plate_05	F	2	PZ0104	CP-91149	Phosphorylation	Enzyme	Inhibitor	glycogen phosphorylase	CP-91149 is a selective glycogen phosphorylase inhibitor.	91.1872	0.769512		119.874	0.789686		2	1.02622	1.02507	0.750691
LOPAC Plate_02	B	10	PZ0003	Sildenafil citrate salt	Phosphodiesterase Inhibitors	Enzyme	Inhibitor	PDE5	Sildenafil is a potent, selective inhibitor of cGMP specific phosphodiesterase type 5 (PDE5).	127.438	0.741591		189.465	0.750419		Batch 1	1.0119	0.986993	0.751365
LOPAC Plate_08	A	7	H8125	L-Histidine hydrochloride	Histamine		Precursor		Histamine precursor	208.988	0.870362		440.243	1.1266		3	1.29441	1.15832	0.751397
LOPAC Plate_04	B	2	SML0552	Tirapazamine	Apoptosis		Inducer		Under hypoxic conditions, tirapazamine is a potent cytotoxic agent that induces apoptosis.	143.074	0.689963		274.695	0.787771		2	1.14176	0.917777	0.751776
LOPAC Plate_02	A	10	PZ0007	Azithromycin dihydrate	Immune Cell Signaling		Modulator	50S subunit	Azithromycin dihydrate is a macrolide antibiotic, azalide subclass. It binds to the 50S subunit of the 70S bacterial ribosomes and inhibits RNA-dependent protein synthesis in bacterial cells.	130.821	0.76128		206.381	0.81742		Batch 1	1.07375	1.00949	0.754126
LOPAC Plate_08	B	4	H1384	Hypotaurine	Cell Stress		Inhibitor	Antioxidant	Antioxidant that binds hydroxyl radicals; GABA transport inhibitor	195.647	0.814802		360.199	0.921767		3	1.13128	1.07996	0.754474
LOPAC Plate_08	A	8	H9002	L-Hyoscyamine	Cholinergic		Antagonist		Competitive antagonist at post-ganglionic synapses and on smooth muscle	191.2	0.796282		409.115	1.04695		3	1.31479	1.05534	0.754529
LOPAC Plate_12	C	10	P4668	Praziquantel	Antibiotic			Ca2+ Ionophore	Ca2+ Ionophore; anthelmintic	326.376	0.84211		334.337	0.824546		3	0.979143	1.11607	0.754533
LOPAC Plate_08	D	8	M7445	MNS	Phosphorylation	Enzyme	Inhibitor	Src/Syk	Src and Syk kinase inhibitor; prevents phosphorylation and cytoskeletal association of GPIIb/IIIa and talin.	177.86	0.740723		377.986	0.967286		3	1.30587	0.980839	0.755193
LOPAC Plate_06	A	5	D9035	Diazoxide	K+ Channel		Activator	ATP-sensitive	Activator of ATP-dependent K+ channels in both vascular smooth muscle and pancreatic beta-cells; antihypertensive	227.619	0.764869		255.41	0.772		2	1.00932	1.01206	0.755758
LOPAC Plate_12	C	7	P1061	SKF-525A hydrochloride	Multi-Drug Resistance	Enzyme	Inhibitor	Microsomal oxidation	Inhibitor of microsomal drug metabolism	274.634	0.708604		334.337	0.824546		3	1.16362	0.936399	0.756734
LOPAC Plate_03	C	1	n/a (no compound empty)	n/a (no compound empty)						92.5474	0.809777		135.14	0.511062		2	0.631114	1.06962	0.757069
LOPAC Plate_07	F	5	F0881	Fusidic acid sodium	Cell Cycle		Inhibitor		Inhibits protein synthesis in prokaryotes	115.224	0.634461		200.959	0.846794		2	1.33467	0.838028	0.757088
LOPAC Plate_07	G	3	SML0610	Nitidine chloride	Apoptosis		Inducer		Natural product apoptosis inducer	136.302	0.75052		171.45	0.722451		2	0.962601	0.990874	0.757433
LOPAC Plate_01	A	8	A4508	O-(Carboxymethyl)hydroxylamine hemihydrochloride	Biochemistry	Enzyme	Inhibitor	Aminotransferase	Non-selective aminotransferase inhibitor	171.608	0.8307	Possibly	167.877	0.884541	Edge effect	Batch 1	1.06481	1.09661	0.757514
LOPAC Plate_01	D	7	A3773	9-Amino-1,2,3,4-tetrahydroacridine hydrochloride	Cholinergic	Enzyme	Inhibitor	Cholinesterase	Cholinesterase inhibitor; reported to be useful in the treatment of Alzheimer's disease	123.11	0.595937		156.685	0.825571		Batch 1	1.38533	0.786271	0.757928
LOPAC Plate_01	D	10	A6011	Acetazolamide	Biochemistry	Enzyme	Inhibitor	Carbonic anhydrase	Carbonic anhydrase inhibitor; diuretic	160.416	0.776524		193.991	1.02214		Batch 1	1.3163	1.02453	0.757933
LOPAC Plate_05	B	3	C106	CGS-12066A maleate	Serotonin		Agonist	5-HT1B	5-HT1B Serotonin receptor agonist	94.2609	0.795451		153.685	1.01242		2	1.27276	1.04928	0.758092
LOPAC Plate_06	A	8	D104	4-DAMP methiodide	Cholinergic		Antagonist	M3	M3 muscarinic acetylcholine receptor antagonist.	247.47	0.831573		231.589	0.7		2	0.841778	1.09661	0.75831
LOPAC Plate_01	D	4	A0779	p-Aminoclonidine hydrochloride	Adrenoceptor		Agonist	alpha2	alpha2 Adrenoceptor agonist	130.571	0.632054	Possibly	182.799	0.963167		Batch 1	1.52387	0.832725	0.759019
LOPAC Plate_09	C	5	I114	p-Iodoclonidine hydrochloride	Adrenoceptor		Agonist	alpha2	High affinity alpha2 adrenoceptor agonist	204.419	0.652679		277.29	0.659455		3	1.01038	0.859368	0.759487
LOPAC Plate_12	F	9	SML0744	LDN-27219	Neurobiology	Enzyme	Inhibitor	TG2	LDN-27219 is a revesible inhibitor of transglutaminase 2 (TG2).	290.555	0.749683		282.594	0.696937		3	0.929643	0.985829	0.760459
LOPAC Plate_07	E	4	P0111	Phenserine	Neurotransmission	Enzyme	Inhibitor	Acetylcholinesterase	Selective, non-competitive acetylcholinesterase (AChE) inhibitor.	102.578	0.564826		146.157	0.615872		2	1.09038	0.742456	0.760753
LOPAC Plate_12	D	4	O2751	Sodium Oxamate	Biochemistry	Enzyme	Inhibitor	Lactate Dehydrogenase	Competitive lactate dehydrogenase inhibitor	290.555	0.749683		330.357	0.81473		3	1.08677	0.984444	0.76153
LOPAC Plate_10	H	6	M7319	ML 10302	Serotonin		Agonist	5-HT4	Potent, selective 5-HT4 serotonin receptor agonist.	228.706	0.767419		427.053	0.933632		3	1.21659	1.00748	0.761722
LOPAC Plate_08	G	1	n/a (no compound empty)	n/a (no compound empty)						182.306	0.759243		284.585	0.728268		3	0.959203	0.994314	0.763585
LOPAC Plate_16	G	10	X6000	Xylometazoline hydrochloride	Adrenoceptor		Agonist	alpha	alpha-Adrenoceptor agonist; imidazoline binding site ligand	135.628	0.758249		257.488	0.961493		3	1.26804	0.991884	0.764453
LOPAC Plate_05	H	10	D5439	2,3-Dimethoxy-1,4-naphthoquinone	Cell Stress		Modulator		Redox cycling agent used to study role of ROS (reactive oxygen species)	97.3346	0.821389		165.98	1.09341		2	1.33117	1.07252	0.76585
LOPAC Plate_01	D	3	A0152	4-Aminopyridine	K+ Channel		Blocker	A-type	Induces depolarization of GABA neurons; weak non-selective K+-channel blocker; anticonvulsant	141.763	0.68623	Possibly	197.722	1.04179		Batch 1	1.51814	0.895008	0.766731
LOPAC Plate_07	C	6	PZ0020	Temsirolimus	Autophagy	Enzyme	Inhibitor	mTOR	Temsirolimus is a specific inhibitor of mammalian target of rapamycin (mTOR) mTOR Complex 1 (mTORC1).	102.578	0.564826		91.3555	0.384951		2	0.68154	0.735625	0.767818
LOPAC Plate_07	H	5	F1553	S-(+)-Fluoxetine hydrochloride	Serotonin		Inhibitor	Reuptake	Selective serotonin reuptake inhibitor	140.517	0.773732		243.114	1.02443		2	1.324	1.00746	0.768004
LOPAC Plate_08	A	6	H5752	17alpha-hydroxyprogesterone	Hormone		Metabolite	Progesterone	Metabolite of progesterone	204.541	0.851842		364.646	0.933147		3	1.09545	1.10308	0.77224
LOPAC Plate_12	A	6	O111	(±)-Octoclothepin maleate	Dopamine		Antagonist	D2	D2 Dopamine receptor antagonist; serotonin receptor antagonist	330.357	0.852379		322.396	0.795098		3	0.932798	1.10308	0.772727
LOPAC Plate_07	F	3	E7138	Ethosuximide	Anticonvulsant				Inhibits voltage-gated sodium channels; used for the treatment of absence-type seizures	136.302	0.75052		171.45	0.722451		2	0.962601	0.971114	0.772844
LOPAC Plate_10	H	3	M1275	(-)-Naproxen sodium	Prostaglandin	Enzyme	Inhibitor	COX	COX-1 and COX-2 inhibitor	212.515	0.713089		410.861	0.898234		3	1.25964	0.921625	0.77373
LOPAC Plate_08	B	6	H6036	1,3,5-tris(4-hydroxyphenyl)-4-propyl-1H-pyrazole	Hormone		Agonist	ER-alpha	Specific estrogen receptor alpha (ERalpha) agonist	191.2	0.796282		413.562	1.05833		3	1.32908	1.02818	0.774457
LOPAC Plate_01	H	10	A6566	2-Hydroxysaclofen	GABA		Antagonist	GABA-B	GABA-B receptor antagonist	171.608	0.8307		253.681	1.33664		Batch 1	1.60905	1.07252	0.774531
LOPAC Plate_06	G	7	N1415	Naratriptan hydrochloride	Serotonin		Agonist	5-HT1B/1D	Naratriptan hydrochloride is a Serotonin 5-HT1B/1D receptor agonist	211.739	0.711506		283.2	0.856		2	1.20308	0.917874	0.775168
LOPAC Plate_07	G	1	n/a (no compound empty)	n/a (no compound empty)						170.026	0.936215		170.026	0.716451		2	0.765263	1.20739	0.775402
LOPAC Plate_06	H	3	D8040	(±) trans-U-50488 methanesulfonate	Opioid		Agonist	kappa	Selective kappa opioid receptor agonist.	267.32	0.898277		314.961	0.952		2	1.05981	1.1579	0.775779
LOPAC Plate_04	A	1	n/a (no compound empty)	n/a (no compound empty)						202.278	0.975465		180.076	0.516424		2	0.529413	1.25613	0.776564
LOPAC Plate_04	B	3	C3909	D-Cycloserine	Glutamate		Agonist	NMDA-Glycine	Excitatory amino acid; partial agonist at the glycine modulatory site of the NMDA glutamate receptor	168.976	0.81487		245.093	0.702879		2	0.862566	1.04928	0.776599
LOPAC Plate_06	E	5	D9305	1-Deoxynojirimycin hydrochloride	Biochemistry	Enzyme	Inhibitor	alpha-glucosidase	alpha-glucosidase I-II inhibitor	187.918	0.631462		247.47	0.748		2	1.18455	0.811428	0.77821
LOPAC Plate_08	H	9	H140	R-(+)-8-Hydroxy-DPAT hydrobromide	Serotonin		Agonist	5-HT1A	Full 5-HT1A serotonin receptor agonist; active enantiomer of (±)-8-hydroxy-DPAT	191.2	0.796282		342.411	0.876248		3	1.10042	1.02216	0.77902
LOPAC Plate_09	C	7	K1003	Ketoconazole	Multi-Drug Resistance	Enzyme	Inhibitor	Cytochrome P450c17	Potent inhibitor of cytochrome P450c17 enzyme; antifungal agent	228.706	0.730225		232.763	0.553561		3	0.758069	0.936399	0.779822
LOPAC Plate_08	C	10	A7845	ATPO	Glutamate		antagonist	AMPA	Competitive antagonist at GluR1-4 (AMPA-preferring) receptors	208.988	0.870362		409.115	1.04695		3	1.20289	1.11607	0.779847
LOPAC Plate_04	B	6	S0693	SB 204741	Serotonin		Antagonist	5-HT2B	5-HT2B serontonin receptor antagonist.	146.775	0.707807		241.393	0.692268		2	0.978047	0.907424	0.780018
LOPAC Plate_13	H	10	Q2128	(+)-Quisqualic acid	Glutamate		Agonist	AMPA	Active enantiomer of quisqualic acid; excitatory amino acid at glutamate receptors; anthelmentic agent	174.939	0.794672		347.902	0.975226		3	1.22721	1.01868	0.780102
LOPAC Plate_12	A	7	P0878	O-Phospho-L-serine	Glutamate		Antagonist	NMDA	Competitive NMDA glutamate receptor antagonist with close structural similarity to L-glutamate	350.258	0.903727		346.277	0.853994		3	0.944968	1.15832	0.780202
LOPAC Plate_08	C	4	H1512	Haloperidol	Dopamine		Antagonist	D2/D1	Dopamine receptor antagonist; antipsychotic	177.86	0.740723		329.071	0.842108		3	1.13687	0.949178	0.780383
LOPAC Plate_15	F	6	T2067	Tyrphostin AG 879	Phosphorylation	Enzyme	Inhibitor	TrkA	Tyrosine kinase nerve growth factor receptor (TrkA) inhibitor; inhibits 140 trk protooncogene and HER-2	127.766	0.706552		277.143	0.954317		3	1.35067	0.905265	0.780492
LOPAC Plate_05	D	7	D1507	L-3,4-Dihydroxyphenylalanine methyl ester hydrochloride	Dopamine		Precursor		Precursor to L-DOPA that crosses the blood-brain barrier	72.745	0.613882		95.2847	0.627699		2	1.02251	0.786271	0.780751
LOPAC Plate_06	D	6	D027	R(-)-Propylnorapomorphine hydrochloride	Dopamine		Agonist	D2	Highly potent and selective D2 dopamine receptor agonist	172.038	0.578099		223.649	0.676		2	1.16935	0.73977	0.781458
LOPAC Plate_13	F	5	P8891	Propantheline bromide	Cholinergic		Antagonist	Muscarinic	Muscarinic acetylcholine receptor antagonist; antispasmodic	151.352	0.687528		277.143	0.776875		3	1.12995	0.879541	0.78169
LOPAC Plate_04	H	8	C7522	Calcimycin	Intracellular Calcium			Ca2+	Ca2+ ionophore used to potentiate responses to NMDA, but not quisqualate glutamate receptors	161.575	0.779182		171.089	0.49065		2	0.629699	0.995717	0.782534
LOPAC Plate_09	F	2	I4883	(±)-Ibuprofen	Prostaglandin	Enzyme	Inhibitor	COX	Anti-inflammatory and analgesic; non-selective COX inhibitor	252.994	0.807771		374.44	0.890497		3	1.10241	1.03158	0.783043
LOPAC Plate_09	F	3	I7378	Indomethacin	Prostaglandin	Enzyme	Inhibitor	COX	Anti-inflammatory; antipyretic and analgesic; blocks prostaglandin biosynthesis by inhibiting prostaglandin cyclooxygenase	240.85	0.768998		394.679	0.938631		3	1.22059	0.981998	0.783095
LOPAC Plate_01	G	3	A0384	Arcaine sulfate	Glutamate		Antagonist	NMDA-Polyamine	Potent competitive antagonist of the polyamine site on the NMDA glutmate receptor	160.416	0.776524		205.183	1.08111		Batch 1	1.39224	0.990874	0.783676
LOPAC Plate_08	C	8	SML0179	SR 27897 hydrate	Cholecystokinin		Antagonist	CCK1	SR 27897 is a potent, selective antagonist of the Cholecystokinin (CCK) receptor CCK1	177.86	0.740723		391.327	1.00143		3	1.35196	0.945073	0.783774
LOPAC Plate_06	A	9	PZ0011	Eletriptan hydrobromide	Serotonin		Agonist	5-HT1B/1D	Eletriptan hydrobromide is a serotonin 5-HT1B/1D receptor agonist; second generation anti-migraine drug.	263.35	0.884936		287.171	0.868		2	0.980862	1.129	0.783821
LOPAC Plate_08	H	2	G119	GYKI 52466 hydrochloride	Glutamate		Antagonist	AMPA/kainate	Selective AMPA/kainate glutamate receptor antagonist; anticonvulsant; skeletal muscle relaxant	195.647	0.814802		382.433	0.978666		3	1.20111	1.03784	0.785094
LOPAC Plate_13	D	11	L3169	LP 12 hydrochloride hydrate	Serotonin		Agonist	5-HT7	5-HT7 receptor agonist displaying selectivity over D2, 5-HT1A and 5-HT2A receptors	206.388	0.93753		461.904	1.29479		3	1.38107	1.19067	0.787399
LOPAC Plate_05	A	6	SML0584	NNGH	Extracellular Matrix	Enzyme	Inhibitor	MMP-3	Potent and cell-permeable inhibitor of matrix metalloproteinase 3 (MMP-3,stromelysin 1, progelatinase).	88.1135	0.743574		132.169	0.870679		2	1.17094	0.943797	0.787854
LOPAC Plate_07	C	10	G0668	GW2974	Phosphorylation	Enzyme	Inhibitor	EGFR / ErbB-2	Dual EGFR and ErbB-2 receptor tyrosine kinase inhibitor	123.655	0.680885		129.295	0.54482		2	0.800164	0.864173	0.787903
LOPAC Plate_09	H	6	PZ0137	CP-471474	Cytoskeleton and Extracellular Matrix	Enzyme	Inhibitor		CP-471474 is a broad spectrum inhibitor of matrix metalloproteinases	248.946	0.794846		297.53	0.707589		3	0.890221	1.00748	0.788945
LOPAC Plate_08	H	8	H9876	Hydroxylamine hydrochloride	Neurotransmission	Enzyme	Inhibitor	MAO	Monoamine oxidase inhibitor	173.413	0.722203		351.305	0.899007		3	1.24481	0.913333	0.790734
LOPAC Plate_10	D	3	L119	L-703,606 oxalate salt hydrate	Tachykinin		Antagonist	NK1	Potent and selective non-peptide NK-1 tachykinin receptor antagonist	252.994	0.848915		451.34	0.98673		3	1.16234	1.07315	0.791054
LOPAC Plate_16	F	9	SML0864	EMPA	Orexin		Antagonist	OXR2	EMPA is a potent, selective OX2R antagonist	139.559	0.780226		273.212	1.02021		3	1.30758	0.985829	0.791442
LOPAC Plate_03	G	11	C2538	Carboplatin	DNA		Intercalator		Antineoplastic	103.196	0.902948		230.711	0.872483		2	0.966261	1.14025	0.791883
LOPAC Plate_04	A	8	M5793	3-Morpholinosydnonimine hydrochloride	Nitric Oxide		Donor		Liberates nitric oxide (NO) spontaneously when in solution, activating guanylyl cyclase and causing an increase in cyclic-GMP. This product is a vasodilator and inhibits platelet aggregation.	180.076	0.868401		359.799	1.03183		2	1.1882	1.09661	0.791894
LOPAC Plate_12	C	11	P5679	3-n-Propylxanthine	Adenosine		Antagonist	A1 > A2	Weak competitive antagonist at both A1 and A2 adenosine receptors	326.376	0.84211		366.178	0.903074		3	1.07239	1.06285	0.792312
LOPAC Plate_04	E	6	C5923	(-)-Cotinine	Cholinergic		Metabolite	Nicotinic	Major metabolite of nicotine in humans	146.775	0.707807		237.693	0.681657		2	0.963055	0.893295	0.792355
LOPAC Plate_06	E	7	D052	GBR-12909 dihydrochloride	Dopamine		Inhibitor	Reuptake	Selective dopamine reuptake inhibitor	179.978	0.60478		267.32	0.808		2	1.33602	0.763061	0.792572
LOPAC Plate_09	H	4	S3572	Stevioside	Ion Channels		Transport inhibitor	PAH	Noncaloric natural sweetener; inhibits transepithelial transport of para-aminohippurate (PAH) by interfering with the organic anion transport system.	216.563	0.691452		370.392	0.880871		3	1.27394	0.872072	0.792884
LOPAC Plate_06	B	5	D9128	3,4-Dihydroxyphenylacetic acid	Dopamine		Metabolite		Product of dopamine degradation by MAO and aldehyde dehydrogenase	243.499	0.818232		227.619	0.688		2	0.840837	1.03125	0.79344
LOPAC Plate_05	D	9	D3900	Desipramine hydrochloride	Adrenoceptor		Inhibitor	Uptake	Antidepressant	81.9661	0.691697		132.169	0.870679		2	1.25876	0.870488	0.794609
LOPAC Plate_11	F	9	N7127	(±)-Normetanephrine hydrochloride	Adrenoceptor		Metabolite	Norepinephrine	Norepinephrine metabolite	290.555	0.783893		417.921	0.927154		3	1.18276	0.985829	0.795161
LOPAC Plate_16	D	8	V4629	(±)-Verapamil hydrochloride	Ca2+ Channel		Modulator	L-type	L-type Ca2+ channel modulator; adrenoceptor antagonist; antiarryhthmic; cardiac depressant; coronary vasodilator	139.559	0.780226		249.626	0.932134		3	1.1947	0.980839	0.795468
LOPAC Plate_12	A	3	PZ0135	PHA-543613	Neurotransmission		Agonist	a7 nAChR	PHA-543613 is a potent selective a7 nAChR agonist.	330.357	0.852379		425.881	1.05031		3	1.23221	1.07132	0.795636
LOPAC Plate_10	E	5	M2547	8-Methoxymethyl-3-isobutyl-1-methylxanthine	Cyclic Nucleotides	Enzyme	Inhibitor	PDE I	Selective inhibitor of Ca2+-calmodulin-dependent phosphodiesterase (PDE I)	220.611	0.740254		410.861	0.898234		3	1.21341	0.930035	0.795943
LOPAC Plate_06	A	6	D9891	Doxycycline hydrochloride	Antibiotic			Protein synthesis	6-deoxytetracycline antibiotic; interferes with protein synthesis	223.649	0.751529		271.29	0.82		2	1.09111	0.943797	0.796282
LOPAC Plate_06	B	9	A8054	D(-)-2-Amino-5-phosphonopentanoic acid	Glutamate		Antagonist	NMDA-glycine	Potent and selective antagonist for NMDA receptors	255.41	0.858255		299.081	0.904		2	1.0533	1.07663	0.797167
LOPAC Plate_03	B	1	n/a (no compound empty)	n/a (no compound empty)						96.0968	0.840834		170.634	0.64529		2	0.76744	1.05442	0.797441
LOPAC Plate_06	H	2	D7505	2,2'-Bipyridyl	Biochemistry	Enzyme	Inhibitor	Metalloprotease	Metalloprotease inhibitor	275.26	0.924958		366.573	1.108		2	1.19789	1.15899	0.79807
LOPAC Plate_03	E	1	n/a (no compound empty)	n/a (no compound empty)						96.0968	0.840834		191.931	0.725827		2	0.863223	1.05352	0.798119
LOPAC Plate_07	E	2	E3263	Efaroxan hydrochloride	Imidazoline		Antagonist	I1	I1 Imidazoline binding site antagonist	136.302	0.75052		137.726	0.580346		2	0.773258	0.940319	0.798155
LOPAC Plate_11	H	9	N7505	NADPH tetrasodium	Nitric Oxide	Enzyme	Cofactor		Cofactor for many enzymes, including nitric oxide synthase	302.495	0.816108		398.02	0.883003		3	1.08197	1.02216	0.798416
LOPAC Plate_01	H	6	D033	(+)-Butaclamol hydrochloride	Dopamine		Antagonist		Dopamine receptor antagonist	171.608	0.8307		171.608	0.904197		Batch 1	1.08848	1.04009	0.798677
LOPAC Plate_06	A	4	D6938	Bisdemethoxycurcumin	Ion Channels		Inhibitor		Bisdemethoxycurcumin (BDMC) is a derivative or curcumin, and represents one of the major active components of curcumin products isolated from Curcumae sp.	231.589	0.77821		227.619	0.688		2	0.88408	0.973718	0.799215
LOPAC Plate_07	G	2	R0158	RepSox	Neuroscience	Enzyme	Inhibitor		RepSox Inhibits TGF-beta receptor signaling. Retroviral transduction of Sox2, Oct4, and Klf4 genes results in direct reprogramming of somatic cells into induced pluripotent stem cells (iPSCs). RepSox Inhibits TGF-beta receptor signaling. Retrovira...	136.302	0.75052		163.019	0.686925		2	0.915265	0.939034	0.799247
LOPAC Plate_09	C	6	M1818	Molindone hydrochloride	Dopamine		Antagonist	D2	D2 dopamine receptor antagonist; monoamine oxidase inhibitor	244.898	0.781922		366.344	0.871244		3	1.11423	0.977727	0.799734
LOPAC Plate_01	A	11	A6671	Actinonin	Biochemistry	Enzyme	Inhibitor	Leucine aminopeptidase	Leucine aminopeptidase inhibitor	175.338	0.848758		175.338	0.923854	Edge effect	Batch 1	1.08848	1.05926	0.801277
LOPAC Plate_08	C	11	I1637	Ipratropium bromide	Cholinergic		Antagonist	Muscarinic	Muscarinic acetylcholine receptor antagonist; bronchodilator	204.541	0.851842		413.562	1.05833		3	1.2424	1.06285	0.801469
LOPAC Plate_02	A	8	A145	1-Allyl-3,7-dimethyl-8-p-sulfophenylxanthine	Adenosine		Antagonist	A2	Weak A2 adenosine receptor antagonist; water soluble	151.121	0.879409		179.315	0.710218	Edge effect	Batch 1	0.807608	1.09661	0.801932
LOPAC Plate_08	A	1	n/a (no compound empty)	n/a (no compound empty)						208.988	0.870362		355.736	0.910345		3	1.04594	1.08475	0.802363
LOPAC Plate_04	G	4	C4542	Cyclobenzaprine hydrochloride	Serotonin		Antagonist	5-HT2	5-HT2 serotonin receptor antagonist	146.775	0.707807		348.699	1		2	1.41282	0.881523	0.802937
LOPAC Plate_06	H	4	S5567	SP600125	Phosphorylation	Enzyme	Inhibitor	c-JNK	Selective c-Jun N-terminal kinase (c-JNK) inhibitor.	259.38	0.871595		370.543	1.12		2	1.285	1.0854	0.803019
LOPAC Plate_02	C	1	n/a (no compound empty)	n/a (no compound empty)						147.737	0.859721		137.594	0.544972		Batch 1	0.633894	1.06962	0.803762
LOPAC Plate_16	H	11	Z101	Zimelidine dihydrochloride	Serotonin		Inhibitor	Reuptake	Serotonin reuptake inhibitor; antidepressant	167.077	0.934068		312.523	1.167		3	1.24938	1.16212	0.803762
LOPAC Plate_05	G	5	C239	CNQX disodium	Glutamate		Antagonist	AMPA/Kainate	Potent, competitive AMPA/kainate glutamate receptor antagonist	103.482	0.873266		135.243	0.890928		2	1.02022	1.08632	0.803878
LOPAC Plate_16	A	2	PZ0141	PD-156707	Neurotransmission and endothelins		Antagonist	Endothelin receptor	PD-156707 is a selective endothelin receptor (ETA) antagonist	163.146	0.912091		296.799	1.10828		3	1.2151	1.13449	0.803966
LOPAC Plate_01	C	9	A5330	L-732,138	Tachykinin		Antagonist	NK1 > NK2, NK3	Competitive antagonist at substance P receptors; approximately 1000-fold more potent at cloned human NK-1 receptors than at cloned human NK-2 and NK-3 receptors	164.146	0.794582	Possibly	186.53	0.982823		Batch 1	1.23691	0.987921	0.804298
LOPAC Plate_06	H	11	E3132	E-64	Biochemistry	Enzyme	Inhibitor	Cysteine protease	Irreversible inhibitor of cysteine proteases	259.38	0.871595		271.29	0.82		2	0.940804	1.08268	0.805033
LOPAC Plate_11	F	10	SML0711	RS504393	Cytokines		Antagonist	CCR2	Highly selective CCR2 chemokine receptor antagonist.	302.495	0.816108		421.901	0.935984		3	1.14689	1.01319	0.805486
LOPAC Plate_12	G	4	O3125	Ouabain	Ion Pump		Inhibitor	Na+/K+ ATPase	Blocks movement of the H5 and H6 transmembrane domains of Na+-K+ ATPases	274.634	0.708604		306.475	0.755834		3	1.06665	0.879611	0.805588
LOPAC Plate_01	F	8	S9318	Sandoz 58-035	Lipid	Enzyme	Inhibitor	ACAT	Acyl-CoA:cholesterol acyltransferase (ACAT) inhibitor	141.763	0.68623		175.338	0.923854		Batch 1	1.34627	0.851165	0.806225
LOPAC Plate_08	A	9	H9882	4-Hydroxybenzhydrazide	Biochemistry	Enzyme	Inhibitor		Phenylalanine ammonia-lyase inhibitor; used to measure reducing sugar levels	222.329	0.925921		418.009	1.0697		3	1.15529	1.14831	0.806331
LOPAC Plate_04	B	9	C7861	Citalopram hydrobromide	Serotonin		Inhibitor	Reuptake	Selective serotonin reuptake inhibitor	180.076	0.868401		233.993	0.671045		2	0.772736	1.07663	0.806592
LOPAC Plate_08	F	8	L2167	L-165,041	Lipid Signaling		Agonist	PPAR-gamma	Peroxisome proliferator-activated receptor (PPAR) gamma agonist.	168.966	0.703683		306.836	0.785209		3	1.11586	0.871692	0.807261
LOPAC Plate_06	C	3	C1493	Cilnidipine	Ca2+ Channels		Blocker	L-type	Slow-acting Ca2+ channel blocker; antihypertensive; vasodilator. Does not inhibit PKC.	243.499	0.818232		287.171	0.868		2	1.06082	1.01332	0.807475
LOPAC Plate_04	G	1	n/a (no compound empty)	n/a (no compound empty)						202.278	0.975465		172.676	0.495201		2	0.507656	1.20739	0.80791
LOPAC Plate_12	B	4	O1008	Oleic Acid	Phosphorylation	Enzyme	Activator	PKC	Activates protein kinase C in hepatocytes; uncouples oxidative phosphorylation	338.317	0.872918		338.317	0.834362		3	0.95583	1.07996	0.808287
LOPAC Plate_09	H	5	S8822	SB-525334	Phosphorylation		Inhibitor	Alk5	A potent activin receptor-like kinase (ALK5)/ type I TGFß-receptor kinase inhibitor .	248.946	0.794846		378.488	0.900124		3	1.13245	0.982953	0.808631
LOPAC Plate_10	G	3	M1022	Dihydrocapsaicin	Vanilloid		Agonist		Capsaicin analog	224.658	0.753837		366.334	0.800888		3	1.06242	0.931656	0.809137
LOPAC Plate_12	H	8	P3510	Papaverine hydrochloride	Cyclic Nucleotides	Enzyme	Inhibitor	PDE	Phosphodiesterase inhibitor	286.574	0.739413		278.614	0.687121		3	0.929279	0.913333	0.809577
LOPAC Plate_12	B	8	P2016	3-alpha,21-Dihydroxy-5-alpha-pregnan-20-one	GABA		Modulator	GABA-A	Positive allosteric modulator of GABA-A receptors	302.495	0.780492		298.515	0.736202		3	0.943253	0.963558	0.81001
LOPAC Plate_06	G	1	n/a (no compound empty)	n/a (no compound empty)						291.141	0.978321		267.32	0.808		2	0.825905	1.20739	0.810276
LOPAC Plate_02	C	9	A201	cis-4-Aminocrotonic acid	GABA		Agonist	GABA-C	GABA-C receptor agonist	137.588	0.800656		165.782	0.656616		Batch 1	0.820098	0.987921	0.810446
LOPAC Plate_04	F	8	C7255	Cystamine dihydrochloride	Glutamate	Enzyme	Inhibitor	Transglutaminase	Transglutaminase inhibitor; substrate analog	143.074	0.689963		322.797	0.92572		2	1.3417	0.851165	0.81061
LOPAC Plate_06	A	1	n/a (no compound empty)	n/a (no compound empty)						303.051	1.01834		295.111	0.892		2	0.875932	1.25613	0.810699
LOPAC Plate_10	H	7	R8404	Rufinamide	Neurotransmission		Anticonvulsant		Broad-spectrum anticonvulsant.	224.658	0.753837		431.101	0.942482		3	1.25025	0.929534	0.810983
LOPAC Plate_16	F	5	SML0229	CIQ	Neurotransmission		Modulator	NR2C/NR2D	CIQ is positive allosteric modulator of NR2C/NR2D subunit containing NMDA receptors.	127.766	0.714294		237.832	0.888096		3	1.24332	0.879541	0.812122
LOPAC Plate_06	H	6	A9605	AC-93253 iodide	Hormone		Agonist	RAR(a)	Potent, cell permeable, subtype selective retinoic acid receptor (RARalpha) agonist.	251.44	0.844914		251.44	0.76		2	0.8995	1.04009	0.812343
LOPAC Plate_14	E	3	R7150	Ro 25-6981 hydrochloride	Glutamate		Antagonist	NMDA-NR2B	NR2B-selective, NMDA glutamate receptor antagonist	183.889	0.87619		263.842	0.781066		3	0.891434	1.07789	0.812879
LOPAC Plate_10	D	7	D9446	L-DOPS	Adrenergics		Agonist		L-DOPS is a norepinephrine precursor in vivo	224.658	0.753837		390.621	0.853985		3	1.13285	0.92715	0.813069
LOPAC Plate_07	D	8	N2538	NS8593 hydrochloride	Ca2+ Channel		Blocker	SK(Ca)	Blocks small conductance Ca2+ activated K+ channels	115.224	0.634461		91.3555	0.384951		2	0.606737	0.779857	0.81356
LOPAC Plate_07	H	1	n/a (no compound empty)	n/a (no compound empty)						195.319	1.07549		153.164	0.645398		2	0.600099	1.32096	0.814169
LOPAC Plate_12	C	8	P2116	Pirfenidone	Immune System		Inhibitor		Inhibitor of collagen production and fibroblast proliferation	298.515	0.770222		298.515	0.736202		3	0.95583	0.945073	0.814987
LOPAC Plate_01	B	6	A2169	3'-Azido-3'-deoxythymidine	Immune System	Enzyme	Inhibitor	Reverse transcriptase	Reverse transcriptase inhibitor; active against HIV-1 virus	152.955	0.740406		190.261	1.00248		Batch 1	1.35396	0.907424	0.815943
LOPAC Plate_06	F	7	D054	R(+)-SCH-23390 hydrochloride	Dopamine		Antagonist	D1	Selective D1 dopamine receptor antagonist	211.739	0.711506		247.47	0.748		2	1.05129	0.871111	0.81678
LOPAC Plate_02	B	9	S3316	SKF-89145 hydrobromide	Dopamine		Agonist	D1	D1 dopamine receptor agonist	151.121	0.879409	Possibly	199.615	0.79062		Batch 1	0.899035	1.07663	0.816816
LOPAC Plate_10	G	7	M4145	Minoxidil	K+ Channel		Activator	ATP sensitive	K+ channel activator; antihypertensive	200.371	0.672341		418.957	0.915933		3	1.3623	0.82256	0.817376
LOPAC Plate_08	F	11	G0419	GR 55562 dihydrobromide	Serotonin		Antagonist	5-HT1B/1D	Selective 5-HT1B/1D serotonin receptor antagonist.	200.094	0.833322		449.137	1.14936		3	1.37926	1.01944	0.817428
LOPAC Plate_16	D	7	SML0210	BMS-299897	Cell Biology	Enzyme	inhibitor	alpha-secretase	BMS-299897 is a potent inhibitor of alpha-secretase	135.628	0.758249		182.797	0.682587		3	0.900215	0.92715	0.817828
LOPAC Plate_06	E	11	C8863	7-Cyclopentyl-5-(4-phenoxy)phenyl-7H-pyrrolo[2,3-d]pyrimidin-4-ylamine	Phosphorylation	Enzyme	Inhibitor	Ick	Potent and selective Ick (src family tyrosine kinase) inhibitor.	207.769	0.698166		243.499	0.736		2	1.05419	0.852984	0.818498
LOPAC Plate_04	A	4	C4382	Carbachol	Cholinergic		Agonist		Acetylcholine receptor agonist	165.276	0.797026		322.797	0.92572		2	1.16147	0.973718	0.818539
LOPAC Plate_01	D	11	SML0189	Indinavir sulfate salt hydrate	immune cell signaling	Enzyme	inhibitor	HIV	Indinavir sulfate is an antiviral HIV protease inhibitor	156.685	0.758465		175.338	0.923854		Batch 1	1.21806	0.926185	0.818913
LOPAC Plate_12	B	6	P0130	Progesterone	Hormone			Progesterone	Suppresses ovulation; induces maturation and secretory activity of the uterine endothelium	326.376	0.84211		282.594	0.696937		3	0.827609	1.02818	0.819028
LOPAC Plate_12	G	8	A0233	AS605240	Biochemistry	Enzyme	Inhibitor	P13K	AS605240 is a potent and selective PI3K inhibitor	294.535	0.759953		306.475	0.755834		3	0.99458	0.927628	0.819243
LOPAC Plate_03	E	3	B4558	BWB70C	Leukotriene	Enzyme	Inhibitor	5-lipoxygenase	Selective inhibitor of 5-lipoxygenase	92.5474	0.809777		294.6	1.11409		2	1.3758	0.988412	0.819271
LOPAC Plate_07	F	6	F4381	Furosemide	Ion Pump		Inhibitor	Na+,K+,Cl- cotransport	Inhibits Na+, K+ and Cl- cotransport	123.655	0.680885		171.45	0.722451		2	1.06105	0.830771	0.819582
LOPAC Plate_06	H	1	n/a (no compound empty)	n/a (no compound empty)						322.901	1.08505		295.111	0.892		2	0.822084	1.32096	0.821407
LOPAC Plate_07	A	2	S3567	SB 415286	Phosphorylation	Enzyme	Inhibitor	GSK-3	Competitive glycogen synthase kinase-3 (GSK-3) inhibitor.	170.026	0.936215		150.373	0.633636		2	0.676806	1.13942	0.821656
LOPAC Plate_06	C	6	D003	R(-)-Apocodeine hydrochloride	Dopamine		Agonist		Dopamine receptor agonist; apomorphine metabolite	179.978	0.60478		255.41	0.772		2	1.2765	0.735625	0.822132
LOPAC Plate_12	C	3	PZ0124	CP-66713	Purinergics		Antagonist	adenosine A2	CP-66713 is an adenosine A2 receptor antagonist	306.475	0.790761		445.782	1.09939		3	1.3903	0.96115	0.822724
LOPAC Plate_06	A	7	PZ0008	Celecoxib	Lipids	Enzyme	Inhibitor	COX-2	Celecoxib is a non-steroidal, anti-inflammatory drug (NSAID) and a cyclooxygenase-2 (COX-2) selective inhibitor.	227.619	0.764869		271.29	0.82		2	1.07208	0.929653	0.822747
LOPAC Plate_06	B	7	M7945	Mephetyl tetrazole	K+ Channel		Blocker	Kv1.5	Potent and selective Kv1.5 potassium channel blocker.	211.739	0.711506		271.29	0.82		2	1.15248	0.864772	0.822768
LOPAC Plate_08	G	2	G117	Glipizide	K+ Channel		Blocker	ATP-sensitive	ATP-dependent K+ channel blocker	186.753	0.777763		342.411	0.876248		3	1.12663	0.94356	0.824285
LOPAC Plate_04	E	3	G5918	GR 113808	Serotonin		Antagonist	5-HT4	5-HT4 serotonin receptor antagonist.	168.976	0.81487		285.795	0.819605		2	1.00581	0.988412	0.824424
LOPAC Plate_01	H	5	PZ0001	Atorvastatin calcium salt trihydrate	Lipids in Cell Signaling	Enzyme	Inhibitor	HMG-CoA reductase	Atorvastatin calcium salt trihydrate is a specific inhibitor of HMG-CoA reductase. HMG-CoA reductase is the enzyme that catalyzes the conversion of HMG-CoA to mevalonate, an early step in chlesterol biosynthesis. Atorvastatin is used in the treatment ...	171.608	0.8307		216.375	1.14007		Batch 1	1.37243	1.00746	0.82455
LOPAC Plate_10	F	1	n/a (no compound empty)	n/a (no compound empty)						240.85	0.808167		435.149	0.951333		3	1.17715	0.979213	0.825323
LOPAC Plate_01	H	2	265128	5-Fluoroindole-2-carboxylic acid	Glutamate		Antagonist	NMDA-Glycine	Competitive inhibitor of potentiation by glycine at the NMDA glutamate receptor	197.722	0.957111		246.22	1.29733		Batch 1	1.35546	1.15899	0.825811
LOPAC Plate_10	D	5	M2537	Mevastatin	Antibiotic	Enzyme	Inhibitor	Ras, Rho	Antibiotic; inhibits post-translational prenylation of proteins such as Ras and geranylgeranylation of Rho	236.802	0.794585		443.244	0.96903		3	1.21954	0.962119	0.825869
LOPAC Plate_01	E	10	A6134	Arecoline hydrobromide	Cholinergic		Agonist		Acetylcholine receptor agonist	152.955	0.740406		190.261	1.00248		Batch 1	1.35396	0.896203	0.826159
LOPAC Plate_12	A	10	P4543	Valproic acid sodium	Anticonvulsant				Anticonvulsant	338.317	0.872918		306.475	0.755834		3	0.86587	1.05643	0.826288
LOPAC Plate_08	F	9	H128	Histamine, R(-)-alpha-methyl-, dihydrochloride	Histamine		Agonist	H3	Potent, selective H3 histamine receptor agonist which crosses the blood-brain barrier; inhibits histamine synthesis and release	195.647	0.814802		395.774	1.01281		3	1.24301	0.985829	0.826514
LOPAC Plate_01	C	1	n/a (no compound empty)	n/a (no compound empty)						182.799	0.884876		186.53	0.982823		Batch 1	1.11069	1.06962	0.827279
LOPAC Plate_03	E	2	B2390	(±)-Brompheniramine maleate	Histamine		Antagonist	H1	H1 Histamine receptor antagonist	88.998	0.778721		301.699	1.14094		2	1.46515	0.940319	0.828145
LOPAC Plate_04	D	5	C5020	Cefazolin sodium	Antibiotic			Cell wall synthesis	Semi-synthetic antibiotic; interferes with cell wall synthesis	157.875	0.761338		241.393	0.692268		2	0.909278	0.919107	0.828346
LOPAC Plate_01	F	7	A3940	1-Aminobenzotriazole	Multi-Drug Resistance	Enzyme	Inhibitor	CYP450, chloroperoxidase	Cytochrome P450 and chloroperoxidase inhibitor	149.224	0.722348		175.338	0.923854		Batch 1	1.27896	0.871111	0.829225
LOPAC Plate_01	H	7	A4393	Apomorphine hydrochloride hemihydrate	Dopamine		Agonist		Non-selective dopamine receptor agonist	190.261	0.920993		231.297	1.2187		Batch 1	1.32325	1.11053	0.829325
LOPAC Plate_01	D	9	A5376	Acetylsalicylic acid	Prostaglandin	Enzyme	Inhibitor	COX-3 > COX-1 > COX-2	COX inhibitor; antithrombotic	149.224	0.722348		193.991	1.02214		Batch 1	1.41502	0.870488	0.829819
LOPAC Plate_02	A	5	A9501	Adenosine 3',5'-cyclic monophosphate	Phosphorylation	Enzyme	Activator	PKA	PKA activator; second messenger	144.354	0.840033	Possibly	216.531	0.857621	Edge effect	Batch 1	1.02094	1.01206	0.830026
LOPAC Plate_05	G	1	n/a (no compound empty)	n/a (no compound empty)						118.85	1.00296		100.408	0.661451		2	0.659501	1.20739	0.830681
LOPAC Plate_03	B	3	B3501	Betaine hydrochloride	Biochemistry	Enzyme	Metabolite		Product in choline-betaine osmoregulatory pathway	99.6462	0.871891		269.754	1.02013		2	1.17003	1.04928	0.830942
LOPAC Plate_03	G	5	A0232	Alfuzosin hydrochloride	Adrenoceptor		Blocker		alpha-adrenergic blocker used to treat benign prostatic hyperplasia (BPH)	103.196	0.902948		177.47	0.671141		2	0.743278	1.08632	0.831201
LOPAC Plate_02	A	9	A178	Acetohexamide	Hormone		Releaser	Insulin	Stimulates insulin release	161.271	0.938474		223.298	0.884422	Edge effect	Batch 1	0.942404	1.129	0.831242
LOPAC Plate_12	B	11	P5654	Piroxicam	Prostaglandin	Enzyme	Inhibitor	COX	Cyclooxygenase (COX) inhibitor	346.277	0.893458		330.357	0.81473		3	0.911884	1.07452	0.831498
LOPAC Plate_05	H	9	D4434	Clodronic acid	Cytoskeleton and ECM	Enzyme	Inhibitor	MMP1 / collagenase	Matrix metalloproteinase 1 (MMP1) and collagenase inhibitor	118.85	1.00296		138.316	0.911176		2	0.908489	1.2054	0.832052
LOPAC Plate_04	B	11	C8903	Clemastine fumarate	Histamine		Antagonist	H1	H1 Histamine receptor antagonist	154.175	0.743494		293.196	0.840828		2	1.13091	0.893464	0.832148
LOPAC Plate_05	B	10	D4526	Doxepin hydrochloride	Adrenoceptor		Inhibitor	Uptake	Antidepressant; antipruritic	97.3346	0.821389		126.022	0.830182		2	1.01071	0.986993	0.832214
LOPAC Plate_08	A	2	G002	Isoguvacine hydrochloride	GABA		Agonist	GABA(A)	GABAA receptor agonist.	226.775	0.944441		449.137	1.14936		3	1.21698	1.13449	0.832481
LOPAC Plate_08	C	1	n/a (no compound empty)	n/a (no compound empty)						191.2	0.796282		289.032	0.739648		3	0.928876	0.9565	0.832496
LOPAC Plate_08	A	5	H2775	DL-threo-beta-hydroxyaspartic acid	Glutamate		Inhibitor	Transport	Glutamate transport inhibitor	208.988	0.870362		418.009	1.0697		3	1.22904	1.04545	0.832524
LOPAC Plate_15	F	1	n/a (no compound empty)	n/a (no compound empty)						147.421	0.815248		171.008	0.58885		3	0.722295	0.979213	0.832554
LOPAC Plate_06	F	5	D9628	L-3,4-Dihydroxyphenylalanine	Dopamine		Precursor		Precursor to dopamine; antiparkinsonian agent	207.769	0.698166		223.649	0.676		2	0.968252	0.838028	0.833105
LOPAC Plate_01	G	6	A3145	Apigenin	Cell Cycle		Inhibitor		Arrests cell cycle at G2/M phase	160.416	0.776524		212.644	1.12042		Batch 1	1.44286	0.932068	0.833119
LOPAC Plate_01	H	1	n/a (no compound empty)	n/a (no compound empty)						227.567	1.10158		182.799	0.963167		Batch 1	0.87435	1.32096	0.833923
LOPAC Plate_06	F	1	n/a (no compound empty)	n/a (no compound empty)						283.2	0.95164		259.38	0.784		2	0.823841	1.14099	0.834045
LOPAC Plate_10	G	6	M3281	alpha-Methyl-DL-tyrosine methyl ester hydrochloride	Neurotransmission	Enzyme	Inhibitor	Tyrosine hydroxylase	Tyrosine hydroxylase inhibitor	244.898	0.82175		435.148	0.951331		3	1.15769	0.985245	0.834057
LOPAC Plate_06	G	6	D031	Dipropyldopamine hydrobromide	Dopamine		Agonist		Dopamine receptor agonist	231.589	0.77821		310.991	0.94		2	1.2079	0.932068	0.834928
LOPAC Plate_06	F	8	D129	R(+)-Butylindazone	Ion Pump		Inhibitor	K+/Cl- transport	Potent [K+, Cl-]-cotransport inhibitor that shows no side effects on the bumetanimide-sensitive [Na+, K+, Cl-]-cotransport system	211.739	0.711506		263.35	0.796		2	1.11875	0.851165	0.835921
LOPAC Plate_05	C	3	C108	2-Cyclooctyl-2-hydroxyethylamine hydrochloride	Neurotransmission	Enzyme	Inhibitor	PNMT	Inhibitor of phenylethanolamine N-methyltransferase (PNMT)	100.408	0.847327		119.874	0.789686		2	0.931972	1.01332	0.836188
LOPAC Plate_01	C	11	A6883	Atropine methyl bromide	Cholinergic		Antagonist	Muscarinic	Competitive muscarinic acetylcholine receptor antagonist	149.224	0.722348		182.799	0.963167		Batch 1	1.33338	0.863641	0.836398
LOPAC Plate_10	F	3	M0814	R(-)-Me5	Na+ Channel		Antagonist		Potent sodium channel antagonist	244.898	0.82175		435.148	0.951331		3	1.15769	0.981998	0.836814
LOPAC Plate_16	G	4	X4753	XCT790	Gene Regulation		Inverse Agonist	ERRalpha	Potent and selective estrogen-related receptor alpha (ERRalpha) inverse agonist.	131.697	0.736272		320.385	1.19636		3	1.62489	0.879611	0.837042
LOPAC Plate_08	G	8	H9772	5-Hydroxy-L-tryptophan	Serotonin		Precursor		Serotonin precursor; antidepressant; anti-epileptic	186.753	0.777763		324.624	0.830728		3	1.0681	0.927628	0.838443
LOPAC Plate_05	B	2	C9901	N6-Cyclohexyladenosine	Adenosine		Agonist	A1	Selective A1 adenosine receptor agonist	91.1872	0.769512		119.874	0.789686		2	1.02622	0.917777	0.838452
LOPAC Plate_03	B	9	PZ0158	PF 3845 hydrate	Cannabinoids	Enzyme	Inhibitor	FAHH	PF 3845 is a potent, irreversible inhibitor of fatty acid amide hydrolase (FAAH),	103.196	0.902948		170.371	0.644295		2	0.713547	1.07663	0.838679
LOPAC Plate_01	B	1	n/a (no compound empty)	n/a (no compound empty)						182.799	0.884876		208.914	1.10076		Batch 1	1.24397	1.05442	0.83921
LOPAC Plate_04	G	8	C7291	Clomipramine hydrochloride	Serotonin		Inhibitor	Reuptake	Serotonin reuptake inhibitor; antidepressant	150.475	0.725651		352.399	1.01061		2	1.3927	0.864651	0.839241
LOPAC Plate_04	C	2	C3025	(±)-Chlorpheniramine maleate	Histamine		Antagonist	H1	H1 Histamine receptor antagonist	157.875	0.761338		300.596	0.862051		2	1.13228	0.906539	0.839829
LOPAC Plate_09	C	3	SML0247	Rizatriptan benzoate salt	Neurotransmission		Agonist	5HT-1B/1D	Rizatriptan is a serotonin 5HT-1B/1D-receptor agonist used to treat migraine	252.994	0.807771		390.632	0.929004		3	1.15008	0.96115	0.840421
LOPAC Plate_16	G	8	V8138	Vancomycin hydrochloride from Streptomyces orientalis	Antibiotic			Cell wall synthesis	Amphoteric glycopeptide antibiotic; interefers with cell wall syntehsis by bind to peptidoglycan	139.559	0.780226		269.281	1.00553		3	1.28877	0.927628	0.841099
LOPAC Plate_12	B	1	n/a (no compound empty)	n/a (no compound empty)						290.555	0.749683		290.555	0.716569		3	0.95583	0.88975	0.842577
LOPAC Plate_12	B	7	P0884	(±)-Propranolol hydrochloride	Adrenoceptor		Antagonist	beta	beta Adrenoceptor antagonist; cardiac depressant (anti-arrhythmic)	318.416	0.82157		298.515	0.736202		3	0.896091	0.974902	0.842721
LOPAC Plate_05	G	9	SML0586	Lomeguatrib	Gene Regulation	Enzyme	Inhibitor	MGMT	Highly potent inactivator of O(6)-methylguanine-DNA methyltransferase (MGMT).	85.0398	0.717635		122.948	0.809934		2	1.12861	0.850024	0.844253
LOPAC Plate_07	E	1	n/a (no compound empty)	n/a (no compound empty)						161.595	0.889791		144.733	0.609872		2	0.68541	1.05352	0.84459
LOPAC Plate_09	G	4	I9531	Imiloxan hydrochloride	Adrenoceptor		Antagonist	alpha2B	Selective alpha2B-adrenoceptor antagonist	232.754	0.743149		289.434	0.688335		3	0.926241	0.879611	0.844861
LOPAC Plate_04	C	1	n/a (no compound empty)	n/a (no compound empty)						187.477	0.904089		180.076	0.516424		2	0.571209	1.06962	0.845242
LOPAC Plate_10	C	5	M2525	Mianserin hydrochloride	Serotonin		Antagonist		Serotonin receptor antagonist	216.563	0.726672		329.903	0.721241		3	0.992527	0.859368	0.845589
LOPAC Plate_04	F	10	A9361	Artemether	Immunomodulators and Antib				Artemether is a methyl ether derivative of artemisinin. It is used against multi-drug resistant strains of falciparum malaria.	150.475	0.725651		282.095	0.808994		2	1.11485	0.85721	0.846526
LOPAC Plate_08	A	3	P0099	Paliperidone	Neurotransmission		Antipsychotic		Atypical antipsychotic; active metabolite of risperidone.	217.882	0.907401		426.902	1.09246		3	1.20395	1.07132	0.846995
LOPAC Plate_14	H	3	R8875	Rotenone	Cell Stress		Modulator	Mitochondria	Inhibitor of mitochondrial electron transport	163.901	0.780952		131.921	0.390533		3	0.500073	0.921625	0.847364
LOPAC Plate_04	D	10	I0160	Imipenem monohydrate	Antibiotic				broad spectrum beta-lactam antibiotic	180.076	0.868401		248.793	0.713491		2	0.821614	1.02453	0.847611
LOPAC Plate_12	E	8	P2607	PRE-084	Opioid		Agonist	sigma1	Potent and highly selective sigma1 receptor agonist	326.376	0.84211		334.337	0.824546		3	0.979143	0.993333	0.847762
LOPAC Plate_13	A	1	n/a (no compound empty)	n/a (no compound empty)						202.457	0.919672		198.526	0.556499		3	0.605106	1.08475	0.847821
LOPAC Plate_08	B	3	G133	GR-89696 fumarate	Opioid		Agonist	kappa	kappa Opioid receptor agonist	195.647	0.814802		409.115	1.04695		3	1.28491	0.960408	0.848391
LOPAC Plate_09	H	3	I7388	Isoxanthopterin	Cell Stress	Enzyme	Metabolite		Product of xanthine oxidase oxidation of pterin, an enzyme involved in reactive oxygen formation.	244.898	0.781922		313.721	0.746096		3	0.954182	0.921625	0.848417
LOPAC Plate_06	H	8	D131	3,5-Dinitrocatechol	Neurotransmission	Enzyme	Inhibitor	COMT	Selective inhibitor of catechol O-methyl transferase (COMT).	251.44	0.844914		326.872	0.988		2	1.16935	0.995717	0.848548
LOPAC Plate_04	G	7	C6643	Clofibrate	Lipid	Enzyme	Modulator	Lipoprotein lipase	Antihyperlipoproteinemic; increases lipoprotein lipase activity, thus enhancing the rate of intravascular catabolism of ULDL to IDL and LDL	161.575	0.779182		359.799	1.03183		2	1.32425	0.917874	0.848899
LOPAC Plate_08	B	9	H108	Hemicholinium-3	Cholinergic		Blocker	Uptake	Potent and selective choline uptake blocker	191.2	0.796282		373.54	0.955907		3	1.20046	0.937956	0.848955
LOPAC Plate_16	E	2	P0115	PAC-1	Apoptosis	Enzyme	Activator	Caspase 3	Caspase 3 activator; apoptosis inducer.	159.215	0.890113		265.35	0.990851		3	1.11317	1.04844	0.848985
LOPAC Plate_01	C	8	A4638	Azathioprine	P2 Receptor	Enzyme	Inhibitor	Purine synthesis	Purine analog; purine synthesis inhibitor; immunosuppressant	149.224	0.722348	Possibly	179.069	0.94351		Batch 1	1.30617	0.85073	0.849091
LOPAC Plate_16	D	9	M0253	L-Mimosine from Koa hoale seeds	Apoptosis		Inhibitor		Potential inhibitor of the cell cycle giving rise to growth arrest in G1-phase. An iron chelator that inhibits DNA replication in mammalian cells. Has been shown to have apoptotic activity in xenotransplanted human pancreatic cancer	155.284	0.868136		261.419	0.976172		3	1.12445	1.02193	0.84951
LOPAC Plate_04	E	10	C8395	Cephradine	Antibiotic			Cell wall synthesis	Semisynthetic cephalosporin antibiotic; interferes with cell wall synthesis	157.875	0.761338		274.695	0.787771		2	1.03472	0.896203	0.849516
LOPAC Plate_03	F	9	C0737	Cilostazol	Cyclic Nucleotides	Enzyme	Inhibitor	PDE III	Specific type III phosphodiesterase (PDE) inhibitor	85.4486	0.747664		269.754	1.02013		2	1.36443	0.879879	0.849734
LOPAC Plate_10	H	5	M2776	Methylergonovine maleate	Dopamine		Antagonist		Dopamine antagonist; ergot alkaloid which interacts with serotonergic, dopaminergic and alpha-adrenergic systems	248.946	0.835333		447.292	0.97788		3	1.17065	0.982953	0.84982
LOPAC Plate_01	B	4	O7639	Org 24598 lithium salt	Neurotransmission		Inhibitor	GlyT1	Selective, potent inhibitor of glial GlyT (GlyT1, glycine transporter type 1).	149.224	0.722348		164.146	0.864884		Batch 1	1.19732	0.849903	0.849918
LOPAC Plate_04	E	5	C5040	Clemizole hydrochloride	Histamine		Antagonist	H1	H1 Histamine receptor antagonist	143.074	0.689963		259.894	0.745325		2	1.08024	0.811428	0.850307
LOPAC Plate_01	H	11	A7162	3-Aminopropylphosphonic acid	GABA		Agonist	GABA-B	GABA-B receptor agonist	190.261	0.920993		223.836	1.17939		Batch 1	1.28056	1.08268	0.850658
LOPAC Plate_09	C	4	I8021	L-N6-(1-Iminoethyl)lysine hydrochloride	Nitric Oxide	Enzyme	Inhibitor	iNOS	Selective inducible nitric oxide synthase (iNOS) inhibitor.	252.994	0.807771		281.338	0.669082		3	0.828307	0.949178	0.851021
LOPAC Plate_07	G	4	D7443	DPO-1	K+ Channel		Blocker	Ikur and Kv1.5	Blocker of the IKur ultrarapid delayed rectifier current and Kv1.5 potassium channel.	136.302	0.75052		154.588	0.651399		2	0.86793	0.881523	0.851391
LOPAC Plate_13	D	10	Q0125	Quercetin dihydrate	Cyclic Nucleotides	Enzyme	Inhibitor	PDE	Mitochondrial ATPase and phosphodiesterase (PDE) inhibitor; inhibits PI3-K activity	198.526	0.901815		343.971	0.964207		3	1.06918	1.05913	0.851468
LOPAC Plate_16	F	11	C1119	Caroverine hydrochloride	Glutamatergics		Antagonist	NMDA/AMPA	Nonselective NMDA and AMPA glutamate receptor antagonist.	155.284	0.868136		273.212	1.02021		3	1.17517	1.01944	0.851578
LOPAC Plate_06	C	8	D122	Domperidone	Dopamine		Antagonist	D2	Peripheral dopamine receptor antagonist that does not cross the blood-brain barrier; anti-emetic	215.709	0.724847		211.739	0.64		2	0.882945	0.85073	0.852029
LOPAC Plate_05	B	1	n/a (no compound empty)	n/a (no compound empty)						106.556	0.899204		109.629	0.722196		2	0.80315	1.05442	0.852799
LOPAC Plate_01	A	4	A0500	Acetamide	Biochemistry	Enzyme	Inhibitor	Carbonic anhydrase	Carbonic anhydrase inhibitor	171.608	0.8307		167.877	0.884541		Batch 1	1.06481	0.973718	0.853122
LOPAC Plate_10	D	6	M3127	S-Methylisothiourea hemisulfate	Nitric Oxide	Enzyme	Inhibitor	iNOS	Selective inducle nitric oxide synthase inhibitor	240.85	0.808167		402.765	0.880534		3	1.08954	0.946967	0.853427
LOPAC Plate_04	F	7	C6628	Chloroquine diphosphate	DNA		Intercalator	DNA	Antimalarial; anti-amoebic; anti-inflammatory; binds strongly to double-stranded DNA	154.175	0.743494		289.496	0.830217		2	1.11664	0.871111	0.853501
LOPAC Plate_07	C	1	n/a (no compound empty)	n/a (no compound empty)						165.811	0.913003		186.888	0.787504		2	0.862542	1.06962	0.853575
LOPAC Plate_01	D	6	A2385	5-azacytidine	DNA Metabolism	Enzyme	Inhibitor	DNA methyltransferase	DNA methyltransferase inhibitor	130.571	0.632054		182.799	0.963167		Batch 1	1.52387	0.73977	0.854393
LOPAC Plate_04	F	1	n/a (no compound empty)	n/a (no compound empty)						202.278	0.975465		198.577	0.569481		2	0.583805	1.14099	0.854926
LOPAC Plate_03	E	9	C0625	Caffeic Acid	Cell Stress		Inhibitor	Antioxidant	Antioxidant; inhibits the synthesis of leukotrienes that are involved in immunoregulation and inflammation	88.998	0.778721		195.217	0.738255		2	0.948036	0.910595	0.855178
LOPAC Plate_05	A	7	D1306	Debrisoquin sulfate	Neurotransmission		Antihypertensive		Antihypertensive; metabolized to tetrahydroisoquinoline (TIQ) which may play a role in the induction of Parkinson's Disease	94.2609	0.795451		129.095	0.850431		2	1.06912	0.929653	0.855642
LOPAC Plate_09	B	4	F8682	Fosmidomycin sodium salt hydrate	Arachidonic Acid Cascade	Enzyme	Inhibitor	DXR	Fosmidomycin is an inhibitor of 1-deoxy-D-xylulose 5-phosphate reductoisomerase (DXR) (MEP synthase)	289.425	0.92409		317.769	0.755723		3	0.817802	1.07996	0.85567
LOPAC Plate_05	F	1	n/a (no compound empty)	n/a (no compound empty)						115.777	0.977019		106.556	0.701948		2	0.718459	1.14099	0.856288
LOPAC Plate_01	G	8	A4910	(±)-2-Amino-3-phosphonopropionic acid	Glutamate		Antagonist	NMDA	NMDA glutamate receptor antagonist	152.955	0.740406		193.991	1.02214		Batch 1	1.38051	0.864651	0.856307
LOPAC Plate_06	F	6	D030	R(-)-2,10,11-Trihydroxy-N-propylnoraporphine hydrobromide	Dopamine		Agonist	D2	Potent and selective D2 dopamine receptor agonist	211.739	0.711506		263.35	0.796		2	1.11875	0.830771	0.856441
LOPAC Plate_16	D	1	n/a (no compound empty)	n/a (no compound empty)						159.215	0.890113		300.734	1.12298		3	1.26162	1.03928	0.856473
LOPAC Plate_04	C	3	C3912	8-(4-Chlorophenylthio)-cAMP sodium	Cyclic Nucleotides	Enzyme	Activator		Membrane-permeable analog of cAMP	180.076	0.868401		389.401	1.11673		2	1.28596	1.01332	0.856985
LOPAC Plate_05	E	3	C3618	Cetirizine dihydrochloride	Histamine		Antagonist	H1	Orally active, non-sedating, and selective H1 histamine receptor antagonist; antihistamine;.	100.408	0.847327		122.948	0.809934		2	0.955869	0.988412	0.857262
LOPAC Plate_16	E	11	Z2001	Zonisamide sodium	Anticonvulsant				Antiepileptic; effective in various animal epilepsy models and in humans with both partial and generalized epileptic seizures	155.284	0.868136		273.212	1.02021		3	1.17517	1.01263	0.857311
LOPAC Plate_05	A	2	C9847	Cyclothiazide	Glutamate		Agonist	AMPA	Blocks the rapid desensitization of AMPA glutamate receptors	115.777	0.977019		122.948	0.809934		2	0.828985	1.13942	0.857467
LOPAC Plate_13	G	11	SML0245	Candesartan cilexetil	Cell Signaling		Antagonist		Candesartan cilexetil is the prodrug form of the potent angiotensin II receptor antagonist, candesartan	186.732	0.848243		359.696	1.00829		3	1.18867	0.988289	0.858295
LOPAC Plate_04	G	3	C4042	Captopril	Neurotransmission	Enzyme	Inhibitor	ACE	Angiotensin-converting enzyme (ACE) inhibitor; antihypertensive	176.376	0.850558		330.198	0.946943		2	1.11332	0.990874	0.858392
LOPAC Plate_06	A	2	P9248	PD 169316	Phosphorylation	Enzyme	Inhibitor	p38 MAP kinase	Potent, cell permeable and selective p38 MAP kinase inhibitor; nM potency	291.141	0.978321		322.901	0.976		2	0.997627	1.13942	0.85861
LOPAC Plate_05	E	10	D5294	Dilazep hydrochloride	Adenosine		Inhibitor	Uptake	Adenosine uptake inhibitor	91.1872	0.769512		110.653	0.728941		2	0.947276	0.896203	0.858636
LOPAC Plate_08	B	5	H3132	Ciproxifan hydrochloride	Histamine		Antagonist	H3	H3 histamine receptor antagonist	200.094	0.833322		351.305	0.899007		3	1.07882	0.970281	0.858846
LOPAC Plate_07	F	4	E006	N-Methyl-beta-carboline-3-carboxamide	GABA		Antagonist	GABA-A	GABA-A receptor antagonist	132.087	0.727309		154.588	0.651399		2	0.895629	0.846552	0.859143
LOPAC Plate_01	C	6	A2251	Acetyl-beta-methylcholine chloride	Cholinergic		Agonist	M1	M1 muscarinic acetylcholine receptor agonist	130.571	0.632054		193.991	1.02214		Batch 1	1.61717	0.735625	0.859207
LOPAC Plate_05	A	1	n/a (no compound empty)	n/a (no compound empty)						128.072	1.08077		109.629	0.722196		2	0.668222	1.25613	0.860399
LOPAC Plate_03	H	4	B7283	Benserazide hydrochloride	Biochemistry	Enzyme	Inhibitor	Decarboxylase	Peripheral decarboxylase inhibitor	106.745	0.934004		273.304	1.03356		2	1.10659	1.0854	0.860517
LOPAC Plate_04	C	9	C7897	Clonidine hydrochloride	Adrenoceptor		Agonist	alpha2	alpha2 Adrenoceptor agonist; antihypertensive	176.376	0.850558		259.894	0.745325		2	0.876278	0.987921	0.860958
LOPAC Plate_01	A	6	A2129	GABA	GABA		Agonist		Endogenous neurotransmitter	167.877	0.812641		190.261	1.00248		Batch 1	1.23361	0.943797	0.861034
LOPAC Plate_09	G	5	I122	ICI 204,448 hydrochloride	Opioid		Agonist	kappa	kappa Opioid receptor agonist that does not cross the blood brain barrier	248.946	0.794846		321.817	0.765349		3	0.96289	0.92311	0.861052
LOPAC Plate_07	F	1	n/a (no compound empty)	n/a (no compound empty)						178.457	0.982639		178.457	0.751977		2	0.765263	1.14099	0.861213
LOPAC Plate_02	D	1	n/a (no compound empty)	n/a (no compound empty)						157.887	0.918786		137.594	0.544972		Batch 1	0.593143	1.06674	0.8613
LOPAC Plate_01	F	9	A5626	Acetylthiocholine chloride	Cholinergic		Agonist	Nicotinic	Nicotinic acetylcholine receptor agonist; acetylcholinesterase substrate	156.685	0.758465		179.069	0.94351		Batch 1	1.24397	0.879879	0.86201
LOPAC Plate_10	F	2	L121	Levallorphan tartrate	Opioid		Antagonist		Opioid receptor antagonist.	265.137	0.889663		439.196	0.960181		3	1.07926	1.03158	0.862429
LOPAC Plate_10	F	4	B1686	BIO	Phosphorylation	Enzyme	Inhibitor	GSK-3alpha/beta	Potent, selective, reversible, and ATP-competitive glycogen synthase kinase 3alpha/beta (GSK-3alpha/beta) inhibitor.	236.802	0.794585		370.382	0.809737		3	1.01907	0.921165	0.862587
LOPAC Plate_07	B	5	T5648	Tamoxifen	Antibiotics/Phosphorylation	Enzyme	Inhibitor	Protein Kinase C	Protein kinase C inhibitor. Induces apoptosis in human malignant glioma cell lines. Tamoxifen and its metabolite 4-hydroxytamoxifen are selective estrogen response modifiers (SERMs) that act as estrogen antagonists in mammary gland. Blocks estradiol-s...	161.595	0.889791		175.665	0.740215		2	0.831897	1.03125	0.862831
LOPAC Plate_16	H	7	U115	U-101958 maleate	Dopamine		Antagonist	D4	Selective D4 dopamine receptor antagonist	143.49	0.802204		296.799	1.10828		3	1.38155	0.929534	0.863017
LOPAC Plate_10	C	7	M3778	Clorgyline hydrochloride	Neurotransmission	Enzyme	Inhibitor	MAO-A	Selective MAO-A inhibitor	240.85	0.808167		354.19	0.774339		3	0.958142	0.936399	0.863059
LOPAC Plate_12	F	7	P1784	Pentoxifylline	Cyclic Nucleotides	Enzyme	Inhibitor	PDE	Inhibits synthesis of tumor necrosis factor alpha (TNF-alpha); phosphodiesterase inhibitor	306.475	0.790761		282.594	0.696937		3	0.88135	0.914334	0.86485
LOPAC Plate_01	G	7	A4147	3-Amino-1-propanesulfonic acid sodium	GABA		Agonist	GABA-A	GABA-A receptor agonist	164.146	0.794582		164.146	0.864884		Batch 1	1.08848	0.917874	0.865677
LOPAC Plate_12	C	9	SML0234	Mitiglinide calcium	Ion channels		Antagonist	KATP	Mitiglinide is a drug for the treatment of type 2 diabetes. It is a highly selective KATP channel antagonist	350.258	0.903727		314.436	0.775466		3	0.858075	1.04357	0.865993
LOPAC Plate_06	G	3	D8008	7,7-Dimethyl-(5Z,8Z)-eicosadienoic acid	Lipid	Enzyme	Inhibitor	PLA2 / Lipoxygenase	Phospholipase A2 and lipoxygenase inhibitor	255.41	0.858255		279.23	0.844		2	0.983391	0.990874	0.866159
LOPAC Plate_08	A	11	I1149	Iodoacetamide	Biochemistry	Enzyme	Inhibitor		Alkylating reagent for cysteine and histidine residues in proteins; irreversible protein inhibitor	244.563	1.01852		431.349	1.10384		3	1.08377	1.17512	0.866735
LOPAC Plate_05	H	5	C271	CX 546	Glutamate		Modulator	AMPA	Positive AMPA glutamate receptor modulator; more potent than 1-BCP	103.482	0.873266		129.095	0.850431		2	0.973851	1.00746	0.866801
LOPAC Plate_11	F	5	M184	3-Morpholinosydnonimine hydrochloride	Nitric Oxide		Donor		Nitric oxide donor	282.594	0.762416		366.178	0.812363		3	1.06551	0.879541	0.866835
LOPAC Plate_01	E	11	A7009	Aminoguanidine hemisulfate	Nitric Oxide	Enzyme	Inhibitor	NOS	Selective nitric oxide synthase inhibitor	152.955	0.740406		182.799	0.963167		Batch 1	1.30086	0.852984	0.868019
LOPAC Plate_07	B	2	E3149	S-Ethylisothiourea hydrobromide	Nitric Oxide	Enzyme	Inhibitor	NOS	Inhibitor of iNOS, eNOS, and nNOS	144.733	0.796944		158.803	0.669162		2	0.83966	0.917777	0.868342
LOPAC Plate_07	D	10	SML0282	Bexarotene	Gene Regulation		Agonist	RXR	Bexarotene is a highly selective retinoid X receptor (RXR) agonist	161.595	0.889791		125.08	0.527057		2	0.592337	1.02453	0.868489
LOPAC Plate_06	C	9	D134	3,7-Dimethyl-1-propargylxanthine	Adenosine		Antagonist	A2	A2 adenosine receptor antagonist.	255.41	0.858255		251.44	0.76		2	0.885518	0.987921	0.868749
LOPAC Plate_13	H	2	P7340	(±)-threo-1-Phenyl-2-decanoylamino-3-morpholino-1-propanol hydrochloride	Sphingolipid	Enzyme	Inhibitor	Glucosylceramide synthase	Glucosylceramide synthase inhibitor; blocks formation of glucosylceramide from ceramide	198.526	0.901815		343.971	0.964207		3	1.06918	1.03784	0.868935
LOPAC Plate_11	B	8	N4148	S-Nitrosoglutathione	Nitric Oxide		Donor		Nitric oxide donor in vivo	310.456	0.837584		390.06	0.865343		3	1.03314	0.963558	0.869262
LOPAC Plate_08	D	9	M7320	N-Methylhistaprodifen dioxalate salt	Histamine		Agonist	H1	H1 histamine receptor agonist.	213.435	0.888881		435.796	1.11522		3	1.25464	1.02193	0.86981
LOPAC Plate_16	F	8	V6383	Vinpocetine	Cyclic Nucleotides	Enzyme	Inhibitor	PDE I	Ca2+ /calmodulin-dependent phosphodiesterase1 (PDE1) inhibitor.	135.628	0.758249		241.763	0.902776		3	1.19061	0.871692	0.869859
LOPAC Plate_01	H	8	A5006	L-Arginine	Nitric Oxide		Precursor		Nitric oxide precursor	179.069	0.866817		246.22	1.29733		Batch 1	1.49666	0.995717	0.870546
LOPAC Plate_02	D	5	I4409	Fulvestrant	Hormone		SERD	Estrogen Receptor	Selective estrogen receptor downregulator (SERD). First pure antiestrogen with no agonistic activity both in vitro and in vivo.	137.588	0.800656		138.715	0.549414		Batch 1	0.686204	0.919107	0.871125
LOPAC Plate_04	G	11	C9754	Colchicine	Cytoskeleton and ECM		Inhibitor	Tubulin	Prevents tubulin polymerization	205.978	0.993309		374.6	1.07428		2	1.08152	1.14025	0.871129
LOPAC Plate_10	E	4	PZ0107	CP-101537	Cytoskeleton and Extracellular Matrix	Enzyme	Inhibitor	MMP	CP-101537 is a MMP inhibitor, candidate drug for myocardial infarction therapy, and antibacterial.	236.802	0.794585		443.244	0.96903		3	1.21954	0.912084	0.871175
LOPAC Plate_16	E	1	n/a (no compound empty)	n/a (no compound empty)						171.008	0.956046		281.079	1.04958		3	1.09784	1.09737	0.871219
LOPAC Plate_01	D	2	194336	5-Aminovaleric acid hydrochloride	GABA		Antagonist	GABA-B	Weak GABA-B receptor antagonist	160.416	0.776524		235.028	1.23836		Batch 1	1.59474	0.890975	0.871543
LOPAC Plate_04	E	11	SML0524	ML277	Ion Channels		Activator	KCNQ1 > KCNQ2, KCNQ4	Potent activator of KCNQ1 (Kv7.1) channels with >100-fold selectivity versus KCNQ2 and KCNQ4 and no activity against the hERG potassium channel.	154.175	0.743494		282.095	0.808994		2	1.0881	0.852984	0.87164
LOPAC Plate_03	D	7	B121	Bromoacetylcholine bromide	Cholinergic		Ligand		Affinity alkylating agent of nicotinic acetylcholine receptors	78.3498	0.68555		202.316	0.765101		2	1.11604	0.786271	0.8719
LOPAC Plate_10	F	5	SML0658	3-MFA	Ion Channels		Blocker	TRPM2	3-MFA is a mefenamic acid analog that blocks the transient receptor potential melastatin 2 (TRPM2) channel.	228.706	0.767419		406.813	0.889384		3	1.15893	0.879541	0.872523
LOPAC Plate_05	G	4	C192	Chlormezanone	Neurotransmission		Modulator	Muscle relaxant	Anxiolytic; muscle relaxant	91.1872	0.769512		122.948	0.809934		2	1.05253	0.881523	0.872935
LOPAC Plate_09	H	11	L106	Loxapine succinate	Dopamine		Antagonist		Dibenzoxazepine antipsychotic agent	317.76	1.01456		447.302	1.06378		3	1.04851	1.16212	0.873025
LOPAC Plate_08	B	7	H8250	(±)-8-Hydroxy-DPAT hydrobromide	Serotonin		Agonist	5-HT1A	Selective 5-HT1A serotonin receptor agonist	204.541	0.851842		333.517	0.853488		3	1.00193	0.974902	0.873771
LOPAC Plate_12	G	7	P1793	Pimozide	Dopamine		Antagonist	D2	Ca2+ channel antagonist; antipsychotic; D2 dopamine receptor antagonist	278.614	0.718874		310.456	0.76565		3	1.06507	0.82256	0.873947
LOPAC Plate_01	A	7	A3539	Gabaculine hydrochloride	GABA	Enzyme	Inhibitor	GABA transaminase	GABA transaminase inhibitor; conformationally constrained GABA analog	167.877	0.812641		175.338	0.923854	Edge effect	Batch 1	1.13685	0.929653	0.874133
LOPAC Plate_04	G	6	C5982	7-Chloro-4-hydroxy-2-phenyl-1,8-naphthyridine	Adenosine		Antagonist	A1	A1 adenosine receptor antagonist	168.976	0.81487		344.999	0.989389		2	1.21417	0.932068	0.87426
LOPAC Plate_04	G	10	C8645	Cinoxacin	Antibiotic	Enzyme	Inhibitor		Quinolone antibacterial; enzyme inhibitor	165.276	0.797026		322.797	0.92572		2	1.16147	0.910343	0.875523
LOPAC Plate_04	C	7	C6048	Cefmetazole sodium	Antibiotic			Cell wall synthesis	Semi-synthetic antibiotic derived from cephamycin C; interferes with cell wall synthesis	168.976	0.81487		259.894	0.745325		2	0.914656	0.930369	0.875857
LOPAC Plate_05	H	1	n/a (no compound empty)	n/a (no compound empty)						137.293	1.15859		109.629	0.722196		2	0.623342	1.32096	0.877079
LOPAC Plate_07	D	1	n/a (no compound empty)	n/a (no compound empty)						170.026	0.936215		153.164	0.645398		2	0.68937	1.06674	0.877639
LOPAC Plate_08	E	11	M1195	Metolazone	Na+ Channel		Inhibitor	Na+/Cl- cotransporter	Inhibitor of thiazide-sensitive Na+/Cl- cotransporter; antihypertensive; moderate loop diuretic.	213.435	0.888881		440.243	1.1266		3	1.26744	1.01263	0.877798
LOPAC Plate_04	F	4	C4522	Cimetidine	Histamine		Antagonist	H2	H2 Histamine receptor antagonist; anti-ulcer agent	154.175	0.743494		311.697	0.893886		2	1.20228	0.846552	0.878262
LOPAC Plate_05	H	7	S4572	SANT-1	Angiogensis		Inhibitor	Smo	Potent sonic hedgehog pathway (Shh) antagonist; inhibits by binding directly to smoothened (Smo) receptor.	115.777	0.977019		119.874	0.789686		2	0.80826	1.11053	0.879775
LOPAC Plate_07	E	11	G6793	GW7647	Transcription		Agonist	PPAR-alpha	Potent agonist of peroxisome proliferator-activated alpha (PPAR-alpha)	136.302	0.75052		171.45	0.722451		2	0.962601	0.852984	0.879877
LOPAC Plate_05	B	8	D2531	Dextromethorphan hydrobromide monohydrate	Glutamate		Antagonist	NMDA	Allosteric antagonist at NMDA-controlled ion channels	88.1135	0.743574		104.506	0.688444		2	0.925858	0.844713	0.880268
LOPAC Plate_06	E	3	D7910	3,4-Dichloroisocoumarin	Biochemistry	Enzyme	Inhibitor	Serine Protease	Serine protease inhibitor	259.38	0.871595		287.171	0.868		2	0.995875	0.988412	0.881814
LOPAC Plate_09	C	8	L0258	L-701,324	Glutamate		Antagonist	NMDA-Glycine	Selective antagonist at the glycine site of the NMDA glutamate receptor	261.09	0.833619		321.817	0.765349		3	0.918104	0.945073	0.882069
LOPAC Plate_13	C	11	Q102	(-)-Quinpirole hydrochloride	Dopamine		Agonist	D2/D3	Selective D2-like dopamine receptor agonist with some selectivity for D3 sites	206.388	0.93753		343.971	0.964207		3	1.02845	1.06285	0.88209
LOPAC Plate_07	A	7	F6020	Fenofibrate	Transcription		Agonist	PPAR-alpha	PPAR-alpha receptor agonist; lipid regulating drug	148.949	0.820156		141.942	0.598109		2	0.729263	0.929653	0.882217
LOPAC Plate_03	F	4	B7005	Betamethasone	Hormone			Glucocorticoid	SAID (steroidal anti-inflammatory drug); glucocorticoid	85.4486	0.747664		234.26	0.885906		2	1.1849	0.846552	0.883188
LOPAC Plate_12	H	4	O3636	ODQ	Cyclic Nucleotides	Enzyme	Inhibitor	NO-sensitive guanylyl cyclase	Potent and selective NO-sensitive guanylyl cyclase inhibitor	298.515	0.770222		358.218	0.883442		3	1.147	0.872072	0.883209
LOPAC Plate_08	C	5	SML0091	L-Dopa ethyl ester	Dopaminergics				L-Dopa ethyl ester is a prodrug of levodopa that has greater gastric solubility	182.306	0.759243		364.646	0.933147		3	1.22905	0.859368	0.88349
LOPAC Plate_10	F	7	M4008	Morin	Cell Stress		Inhibitor	Antioxidant	Flavonoid with anti-oxidant properties; oxyradical scavenger	240.85	0.808167		418.957	0.915933		3	1.13335	0.914334	0.883887
LOPAC Plate_06	E	2	D6899	Diclofenac sodium	Prostaglandin	Enzyme	Inhibitor	COX	Cyclooxygenase inhibitor; anti-inflammatory	247.47	0.831573		299.081	0.904		2	1.0871	0.940319	0.884352
LOPAC Plate_13	E	3	P7791	Prazosin hydrochloride	Adrenoceptor		Antagonist	alpha1	Peripheral alpha1 adrenoceptor antagonist	210.319	0.955387		367.558	1.03032		3	1.07844	1.07789	0.886353
LOPAC Plate_12	B	9	P4015	1-Phenyl-3-(2-thiazolyl)-2-thiourea	Dopamine	Enzyme	Inhibitor	beta-Hydroxylase	Dopamine beta-hydroxylase inhibitor	322.396	0.83184		362.198	0.893258		3	1.07383	0.937956	0.886865
LOPAC Plate_12	A	2	N144	Nitrendipine	Ca2+ Channel		Antagonist	L-type	Ca2+ channel blocker; antihypertensive	390.06	1.00642		433.842	1.06995		3	1.06312	1.13449	0.887116
LOPAC Plate_04	A	11	C8773	Centrophenoxine hydrochloride	Nootropic				Nootropic; cholinergic drug	194.877	0.939777		356.099	1.02122		2	1.08667	1.05926	0.887203
LOPAC Plate_06	H	10	E0516	Etodolac	Prostaglandin	Enzyme	Inhibitor	COX	Non-steroidal anti-inflammatory drug (NSAID)	283.2	0.95164		354.662	1.072		2	1.12648	1.07252	0.887294
LOPAC Plate_06	F	4	D8555	N,N-Dihexyl-2-(4-fluorophenyl)indole-3-acetamide	Benzodiazepine		Ligand	Mitochondria	High affinity ligand for glial mitochondrial benzodiazepine receptors	223.649	0.751529		239.529	0.724		2	0.96337	0.846552	0.887753
LOPAC Plate_04	H	2	C3635	DL-p-Chlorophenylalanine methyl ester hydrochloride	Neurotransmission	Enzyme	Inhibitor	Tryptophan hydroxylase	Tryptophan hydroxylase inhibitor	213.378	1.029		467.105	1.33957		2	1.30182	1.15899	0.887835
LOPAC Plate_08	G	9	H135	5-hydroxydecanoic acid sodium	K+ Channel		Blocker		Blocks post ischemic actions of the K+ channel activator cromakalim	191.2	0.796282		329.071	0.842108		3	1.05755	0.89631	0.888401
LOPAC Plate_05	D	3	C117	5-Carboxamidotryptamine maleate	Serotonin		Agonist	5-HT7	5-HT7 Serotonin receptor agonist	94.2609	0.795451		129.095	0.850431		2	1.06912	0.895008	0.888764
LOPAC Plate_06	D	10	S4443	SCH-28080	Ion Channels	Enzyme	Inhibitor	H+/K+-ATPase	Potent inhibitor of gastric H+ and K+-ATPase.	271.29	0.911618		215.709	0.652		2	0.715212	1.02453	0.889793
LOPAC Plate_05	B	7	D1413	2',3'-didehydro-3'-deoxythymidine	Immune System	Enzyme	Inhibitor	Reverse Transcriptase	Nucleoside analog; inhibits HIV replication in vitro	91.1872	0.769512		113.727	0.749189		2	0.97359	0.864772	0.889844
LOPAC Plate_08	B	10	S0323	Sematilide monohydrochloride monohydrate	K+ Channel Modulator		Blocker	Kir	Sematilide monohydrochloride monohydrate is a class III antiarrhythmic; selective delayed rectifier K+ current (IKr) channel blocker.	226.775	0.944441		404.668	1.03557		3	1.09649	1.06114	0.890027
LOPAC Plate_10	G	5	M2727	Mexiletene hydrochloride	Na+ Channel		Blocker		Sodium channel blocker	244.898	0.82175		463.484	1.01328		3	1.23307	0.92311	0.890197
LOPAC Plate_07	D	3	E4378	EGTA	Biochemistry	Enzyme	Inhibitor	Carboxypeptidase B	Carboxypeptidase B inhibitor; chelating agent useful for the determination of calcium in the presence of magnesium	144.733	0.796944		125.08	0.527057		2	0.661347	0.895008	0.890432
LOPAC Plate_13	E	11	Q109	Quipazine, 6-nitro-, maleate	Serotonin		Inhibitor	Reuptake	Potent and selective serotonin reuptake inhibitor	198.526	0.901815		355.764	0.997266		3	1.10584	1.01263	0.89057
LOPAC Plate_06	E	1	n/a (no compound empty)	n/a (no compound empty)						279.23	0.938299		279.23	0.844		2	0.8995	1.05352	0.890633
LOPAC Plate_05	A	10	D4505	Phenytoin sodium	Anticonvulsant				Anticonvulsant; anti-epileptic	106.556	0.899204		104.506	0.688444		2	0.765615	1.00949	0.890755
LOPAC Plate_05	C	11	D5766	5,5-Dimethyl-1-pyrroline-N-oxide	Cell Stress	Enzyme	Inhibitor	Antioxidant	Neuroprotective agent	91.1872	0.769512		119.874	0.789686		2	1.02622	0.863641	0.89101
LOPAC Plate_05	D	1	n/a (no compound empty)	n/a (no compound empty)						112.703	0.951081		112.703	0.742445		2	0.780632	1.06674	0.891575
LOPAC Plate_01	G	10	PZ0002	Maraviroc	Immune signaling		Antagonist	CCR5	Maraviroc is a CCR5 chemokine receptor antagonist, and antiretroviral entry inhibitor	167.877	0.812641		175.338	0.923854		Batch 1	1.13685	0.910343	0.892675
LOPAC Plate_10	F	6	M3262	N-Methyl-D-aspartic acid	Glutamate		Agonist	NMDA	NMDA glutamate receptor agonist	240.85	0.808167		439.196	0.960181		3	1.1881	0.905265	0.892741
LOPAC Plate_05	D	2	PZ0016	Dofetilide	Ion Channels		Channel Blocker	hERG	Dofetilide is a Class III antiarrhythmic and hERG channel blocker. Dofetilide selectively blocks the rapid component of the delayed rectifier outward potassium current (IKr).	94.2609	0.795451		116.801	0.769437		2	0.967298	0.890975	0.892786
LOPAC Plate_13	E	5	P8887	5alpha-Pregnan-3alpha-ol-20-one	GABA		Modulator	GABA-A	Positive allosteric modulator of GABA-A chloride channels	182.801	0.830386		363.627	1.0193		3	1.22751	0.930035	0.892855
LOPAC Plate_07	G	7	E7906	Esomeprazole magnesium dihydrate	Ion Channel		Inhibitor		Esomeprazole magnesium dihydrate is a leading proton pump inhibitor.	148.949	0.820156		179.881	0.757978		2	0.924187	0.917874	0.893539
LOPAC Plate_02	F	8	P9872	Psora-4	K+ Channel		Inhibitor	Kv1.3	Potent Kv1.3 potassium channel inhibitor.	130.821	0.76128		138.715	0.549414		Batch 1	0.721698	0.851165	0.894398
LOPAC Plate_04	D	2	C3130	Cortisone 21-acetate	Hormone			Cortisol	Anti-inflammatory cortisol	165.276	0.797026		307.997	0.883274		2	1.10821	0.890975	0.894554
LOPAC Plate_10	E	8	M5154	Moxisylyte hydrochloride	Adrenoceptor		Antagonist	alpha1	alpha1-Adrenoceptor antagonist	265.137	0.889663		483.723	1.05753		3	1.18868	0.993333	0.895635
LOPAC Plate_07	E	5	F0778	Felbamate	Glutamate		Antagonist		Anticonvulsant; glutamate receptor antagonist	132.087	0.727309		184.096	0.775741		2	1.06659	0.811428	0.896331
LOPAC Plate_16	G	2	B7688	Tyrphostin AG 538	Apoptosis	Enzyme	Inhibitor	Pin-1	Insulin growth factor 1 (IGF-1) receptor protein tyrosine kinase inhibitor	151.352	0.846159		261.419	0.976172		3	1.15365	0.94356	0.896772
LOPAC Plate_09	C	2	I2892	Ifenprodil tartrate	Glutamate		Blocker	Polyamine site NMDA	Blocks the polyamine binding site associated with the NMDA glutamate receptor; neuroprotective	265.137	0.846544		293.482	0.697962		3	0.824485	0.943888	0.896869
LOPAC Plate_01	D	1	n/a (no compound empty)	n/a (no compound empty)						197.722	0.957111		179.069	0.94351		Batch 1	0.98579	1.06674	0.897227
LOPAC Plate_11	C	8	N4159	NCS-382	GABA		Antagonist	gamma-Hydroxybutyrate	gamma-Hydroxybutyrate receptor antagonist	314.436	0.848322		445.782	0.988964		3	1.16579	0.945073	0.897627
LOPAC Plate_04	D	1	n/a (no compound empty)	n/a (no compound empty)						198.577	0.957621		180.076	0.516424		2	0.539278	1.06674	0.897705
LOPAC Plate_03	F	3	B5002	5-Bromo-2'-deoxyuridine	DNA Metabolism		Inhibitor		Thymidine analog; incorporated into DNA during S-phase of cell cycle	99.6462	0.871891		283.952	1.07383		2	1.23161	0.971114	0.897825
LOPAC Plate_06	D	11	E1896	Etazolate hydrochloride	Adenosine	Enzyme	Inhibitor	Phosphodiesterase	Phosphodiesterase inhibitor	247.47	0.831573		271.29	0.82		2	0.986083	0.926185	0.897847
LOPAC Plate_01	B	8	A4562	5-(N,N-Dimethyl)amiloride hydrochloride	Ion Pump		Blocker	Na+/H+ Antiporter	Selective blocker of Na+/H+ antiport	156.685	0.758465		167.877	0.884541		Batch 1	1.16622	0.844713	0.897896
LOPAC Plate_04	B	10	C8145	Cefsulodin sodium salt hydrate	Antibiotic			Cell wall synthesis	Third generation cephalosporin antibiotic; interferes with cell wall synthesis	183.777	0.886245		267.294	0.766548		2	0.864939	0.986993	0.897925
LOPAC Plate_13	D	4	P8386	Phenylbutazone	Prostaglandin	Enzyme	Substrate	Prostaglandin peroxidase	Anti-inflammatory; substrate for prostaglandin peroxidase	194.594	0.883958		347.902	0.975226		3	1.10325	0.984444	0.897926
LOPAC Plate_06	G	4	D9071	Donitriptan monohydrochloride	Neurotransmission		Agonist	5-HT1B/1D	Donitriptan is a potent, selective 5-HT1B/1D agonist.	235.559	0.791551		318.931	0.964		2	1.21786	0.881523	0.897936
LOPAC Plate_14	D	1	n/a (no compound empty)	n/a (no compound empty)						195.882	0.933333		259.844	0.76923		3	0.824175	1.03928	0.89806
LOPAC Plate_09	G	6	I18008	Isonipecotic acid	GABA		Agonist	GABA-A	GABA-A receptor agonist	277.281	0.885317		342.057	0.813483		3	0.918861	0.985245	0.898575
LOPAC Plate_11	E	9	N5751	NG-Nitro-L-arginine methyl ester hydrochloride	Nitric Oxide	Enzyme	Inhibitor	NOS	Competitive inhibitor of nitric oxide synthase	342.297	0.92349		366.178	0.812363		3	0.879666	1.02718	0.899055
LOPAC Plate_13	G	5	K1015	K114	Neurotransmission		Amyloid probe		A fluorescent, amyloid-specific dye, an analogue of Congo Red and BSB that recognizes amyloid lesions and allows the quantitative monitoring of the formation of amyloid fibrils assembled from the Aß peptide, a-synuclein, and tau.	182.801	0.830386		300.729	0.842992		3	1.01518	0.92311	0.899552
LOPAC Plate_06	G	2	D6940	R-(-)-Desmethyldeprenyl hydrochloride	Neurotransmission	Enzyme	Inhibitor	MAO-B	MAO-B inhibitor; metabolite of L-deprenyl	251.44	0.844914		354.662	1.072		2	1.26877	0.939034	0.899769
LOPAC Plate_05	D	6	D0670	Dihydroouabain	Ion Pump		Inhibitor	Na+/K+ Pump	Sodium-potassium pump inhibitor	78.8924	0.665759		116.801	0.769437		2	1.15573	0.73977	0.899953
LOPAC Plate_11	H	2	SML0227	JW74	Transcription		Inhibitor	b-catenin/GSK-3b/AXIN/APC /CK1	JW74 is an efficient and specific inhibitor of the canonical Wnt signaling in vitro and in vivo	346.277	0.934229		421.901	0.935984		3	1.00188	1.03784	0.900166
LOPAC Plate_04	D	7	C6305	Clozapine	Dopamine		Antagonist	D4 > D2,D3	Atypical neuroleptic agent which display greater affinity for the D4 dopamine receptors over D2 or D3	146.775	0.707807		263.594	0.755937		2	1.068	0.786271	0.900207
LOPAC Plate_05	A	3	C104	(±)-CPP	Glutamate		Antagonist	NMDA	Potent and selective NMDA glutamate receptor antagonist; anticonvulsant	103.482	0.873266		122.948	0.809934		2	0.927477	0.969573	0.900671
LOPAC Plate_06	B	11	E1383	Etoposide	Apoptosis	Enzyme	Inhibitor	Topo II	Topoisomerase II inhibitor; induces apoptosis; cell cycle inhibitor	239.529	0.804892		287.171	0.868		2	1.07841	0.893464	0.900866
LOPAC Plate_02	B	8	A155	trans-(±)-ACPD	Glutamate		Agonist	Metabotropic	Metabotropic glutamate receptor agonist	130.821	0.76128		138.715	0.549414		Batch 1	0.721698	0.844713	0.901228
LOPAC Plate_05	E	9	M1777	N-Methyl-1-deoxynojirimycin	Biochemistry	Enzyme	Inhibitor	Glucosidase	Interferes with metabolism of N-linked glycoproteins by inhibition of glucosidase	97.3346	0.821389		119.874	0.789686		2	0.961403	0.910595	0.902036
LOPAC Plate_13	F	11	Q110	Quinelorane dihydrochloride	Dopamine		Agonist	D2	D2 Dopamine receptor agonist; 2-aminopyridine analog of Quinpirole	202.457	0.919672		347.902	0.975226		3	1.06041	1.01944	0.902131
LOPAC Plate_05	E	1	n/a (no compound empty)	n/a (no compound empty)						112.703	0.951081		106.556	0.701948		2	0.738053	1.05352	0.902766
LOPAC Plate_08	B	8	H9003	Hydroquinone	Leukotriene	Enzyme	Inhibitor	Arachidonate 12-Lipoxygenase	Arachidonate 12-Lipoxygenase inhibitor	208.988	0.870362		360.199	0.921767		3	1.05906	0.963558	0.903279
LOPAC Plate_13	C	10	P63204	Quinolinic acid	Glutamate		Antagonist	NMDA	Neurotoxin which has neuroexcitatory activity; metabolite of trytophan	222.112	1.00896		332.178	0.931148		3	0.922881	1.11607	0.90403
LOPAC Plate_05	F	9	D4007	5,5-Diphenylhydantoin	Anticonvulsant				Anticonvulsant; appears to stabilize excitable membranes perhaps through effects on Na+, K+, and Ca2+ channels	94.2609	0.795451		122.948	0.809934		2	1.01821	0.879879	0.904045
LOPAC Plate_01	F	10	A6351	A-315456	Adrenoceptor		Antagonist	alpha1D	Selective alpha 1D-adrenoceptor antagonist	160.416	0.776524		171.608	0.904197		Batch 1	1.16442	0.85721	0.905873
LOPAC Plate_11	H	10	N8534	Nilutamide	Hormone		Inhibitor	Androgen	Antiandrogen	342.297	0.92349		382.099	0.847683		3	0.917913	1.01868	0.906559
LOPAC Plate_02	C	3	A8003	Allopurinol	Cell Stress	Enzyme	Inhibitor	Xanthine oxidase	Xanthine oxidase inhibitor; inhibits the final step in uric acid biosynthesis	157.887	0.918786		175.932	0.696817		Batch 1	0.758411	1.01332	0.906707
LOPAC Plate_02	A	3	A7824	6-Aminohexanoic acid	Immune System		Inhibitor	Blood Clotting	Promotes rapid dissociation of plasmin, thereby inhibiting the activation of plasminogen and subsequent fibrinolysis; inhibits plasminogen binding to activated platelets	151.121	0.879409		233.448	0.924623		Batch 1	1.05141	0.969573	0.907007
LOPAC Plate_02	G	1	n/a (no compound empty)	n/a (no compound empty)						188.337	1.09598		147.744	0.585173		Batch 1	0.533926	1.20739	0.907725
LOPAC Plate_06	F	10	E0137	Vanillic acid diethylamide	Vanilloid		Agonist		CNS and respiratory stimulant	231.589	0.77821		291.141	0.88		2	1.1308	0.85721	0.90784
LOPAC Plate_03	D	11	C2235	CB 1954	DNA		Intercalator		Prodrug activated by NAD(P)H quinone oxidoreductase-2	96.0968	0.840834		273.304	1.03356		2	1.2292	0.926185	0.907846
LOPAC Plate_10	C	4	M1514	N-omega-Methyl-5-hydroxytryptamine oxalate salt	Serotonin		Ligand		Serotonin receptor ligand	257.042	0.862498		317.759	0.694693		3	0.805442	0.949178	0.908679
LOPAC Plate_02	F	1	n/a (no compound empty)	n/a (no compound empty)						178.187	1.03692		134.211	0.531571		Batch 1	0.512647	1.14099	0.908783
LOPAC Plate_12	B	3	N170	NS-1619	K+ Channel		Activator	Ca2+ activated	Selective large conductance Ca2+-activated K+-channel activator	338.317	0.872918		330.357	0.81473		3	0.93334	0.960408	0.908903
LOPAC Plate_15	D	1	n/a (no compound empty)	n/a (no compound empty)						171.008	0.945683		202.457	0.697141		3	0.737182	1.03928	0.909943
LOPAC Plate_11	E	10	M2199	PMEG hydrate	Apoptosis and Cell Cycle	Enzyme	Inhibitor	DNA polymerase	potent inhibition of the nuclear DNA polymerases resulting in inhibition of DNA synthesis and/or DNA repair	342.297	0.92349		402	0.891834		3	0.965721	1.01469	0.910121
LOPAC Plate_05	H	2	C102	8-Cyclopentyl-1,3-dimethylxanthine	Adenosine		Antagonist	A1	Selective A1 adenosine receptor antagonist	124.998	1.05483		156.759	1.03267		2	0.978984	1.15899	0.910129
LOPAC Plate_15	E	10	B9685	BAY 61-3606 hydrochloride hydrate	Phosphorylation	Enzyme	Inhibitor	Tyrosine kinase	Spleen tyrosine kinase (Syk) inhibitor; anti-inflammatory	167.077	0.923944		324.316	1.11675		3	1.20868	1.01469	0.910568
LOPAC Plate_09	H	7	K3375	Kynurenic acid	Glutamate		Antagonist	NMDA-Glycine	Excitatory amino acid receptor antagonist; blocks kainic acid-induced neurotoxicity; metabolite of tryptophan	265.137	0.846544		350.152	0.832737		3	0.98369	0.929534	0.910718
LOPAC Plate_13	E	2	218359	(-)-Perillic acid	G protein		Inhibitor	p21 Ras	Interferes with activity of p21ras and other small G proteins by inhibiting post-translational cysteine isoprenylation	210.319	0.955387		355.764	0.997266		3	1.04383	1.04844	0.911243
LOPAC Plate_06	F	3	D7938	DBO-83	Cholinergic		Agonist	Nicotinic	Nicotinic acetylcholine receptor agonist	263.35	0.884936		279.23	0.844		2	0.953741	0.971114	0.911258
LOPAC Plate_09	B	5	I106	S(+)-Ibuprofen	Prostaglandin	Enzyme	Inhibitor	COX	Active enantiomer of Ibuprofen; NSAID	277.281	0.885317		333.961	0.79423		3	0.897114	0.970281	0.912433
LOPAC Plate_10	B	7	U106	(-)-cis-(1S,2R)-U-50488 tartrate	Neurotransmission		Ligand	Sigma receptor	Potent sigma receptor ligand.	265.137	0.889663		406.813	0.889384		3	0.999686	0.974902	0.912566
LOPAC Plate_06	A	3	D7644	Disopyramide	Na+ Channel		Blocker		Sodium channel blocker; class IA antiarrhythmic	263.35	0.884936		267.32	0.808		2	0.91306	0.969573	0.912707
LOPAC Plate_13	H	6	P9797	Pyridostigmine bromide	Cholinergic	Enzyme	Inhibitor	Cholinesterase	Cholinesterase inhibitor	202.457	0.919672		340.04	0.953187		3	1.03644	1.00748	0.912845
LOPAC Plate_08	H	4	H2380	6-Hydroxy-DL-DOPA	Adrenoceptor		Neurotoxin		Precursor of the catecholaminergic neurotoxin, 6-hydroxydopamine; converted to 6-hydroxydopamine by L-aromatic amino acid decarboxylase	191.2	0.796282		333.517	0.853488		3	1.07184	0.872072	0.913092
LOPAC Plate_14	A	1	n/a (no compound empty)	n/a (no compound empty)						207.875	0.990476		251.848	0.745561		3	0.75273	1.08475	0.913093
LOPAC Plate_05	F	7	K3519	KRM-III	Immunomodulators and Antibiotics	Enzyme	Inhibitor		KRM-III is an inhibitor of T cell antigen receptor (TCR), an inhibitor of phorbol myristate acetate (PMA) /ionomycin-induced nuclear factor of activated T cells (NFAT) activation and T cell proliferation.	94.2609	0.795451		107.579	0.708692		2	0.890932	0.871111	0.913145
LOPAC Plate_13	B	1	n/a (no compound empty)	n/a (no compound empty)						178.87	0.812529		214.25	0.600577		3	0.739146	0.88975	0.91321
LOPAC Plate_05	C	1	n/a (no compound empty)	n/a (no compound empty)						115.777	0.977019		103.482	0.6817		2	0.697734	1.06962	0.913425
LOPAC Plate_13	G	8	A1980	A3 hydrochloride	Phosphorylation	Enzyme	Inhibitor	Casein kinase	Non-selective casein kinase (CK) inhibitor.	186.732	0.848243		332.178	0.931148		3	1.09774	0.927628	0.914422
LOPAC Plate_06	C	1	n/a (no compound empty)	n/a (no compound empty)						291.141	0.978321		299.081	0.904		2	0.924032	1.06962	0.914642
LOPAC Plate_05	D	11	D5782	2',3'-dideoxycytidine	Immune System	Enzyme	Inhibitor	Reverse Transcriptase	Nucleoside analog; reverse transcriptase inhibitor; antiviral	100.408	0.847327		122.948	0.809934		2	0.955869	0.926185	0.914857
LOPAC Plate_07	B	8	F6889	Famotidine	Histamine		Antagonist	H2	H2 Histamine receptor antagonist	140.517	0.773732		150.373	0.633636		2	0.818934	0.844713	0.91597
LOPAC Plate_03	A	1	n/a (no compound empty)	n/a (no compound empty)						131.591	1.1514		216.776	0.819787		2	0.71199	1.25613	0.916627
LOPAC Plate_04	G	9	C8031	N6-Cyclopentyladenosine	Adenosine		Agonist	A1	Selective A1 adenosine receptor agonist	161.575	0.779182		315.397	0.904497		2	1.16083	0.850024	0.916659
LOPAC Plate_04	B	4	C4397	Chlorzoxazone	Nitric Oxide	Enzyme	Inhibitor	iNOS	Inducible nitric oxide synthetase inhibitor; skeletal muscle relaxant	161.575	0.779182		252.494	0.724102		2	0.929311	0.849903	0.91679
LOPAC Plate_16	H	10	SML0892	Roslin 2					Roslin 2 is a p53 reactivator that disrupts the FAK and p53 interaction.	167.077	0.934068		308.592	1.15232		3	1.23366	1.01868	0.916943
LOPAC Plate_12	H	7	P1801	L-Glutamic acid, N-phthaloyl-	Glutamate		Agonist	NMDA	Selective NMDA glutamate receptor agonist	330.357	0.852379		350.258	0.86381		3	1.01341	0.929534	0.916996
LOPAC Plate_15	H	1	n/a (no compound empty)	n/a (no compound empty)						159.215	0.880466		186.732	0.642995		3	0.73029	0.958922	0.918182
LOPAC Plate_13	D	2	P6909	Phosphonoacetic acid	DNA	Enzyme	Inhibitor	DNA Polymerase	DNA Polymerase inhibitor	210.319	0.955387		367.558	1.03032		3	1.07844	1.04016	0.918503
LOPAC Plate_13	D	5	P8852	6(5H)-Phenanthridinone	Transcription	Enzyme	Inhibitor	PARP	Poly(ADP-ribose) Polymerase (PARP) inhibitor	194.594	0.883958		351.833	0.986246		3	1.11572	0.962119	0.918761
LOPAC Plate_08	D	7	H8627	Hydroxyurea	DNA Metabolism	Enzyme	Inhibitor	Ribonucleoside reductase	Antineoplastic; inactivates ribonucleoside reductase which blocks the synthesis of deoxynucleotides	204.541	0.851842		395.774	1.01281		3	1.18896	0.92715	0.918774
LOPAC Plate_09	F	4	I8898	Ivermectin	Cholinergic		Modulator	alpha7 nACh	Positive allosteric modulator of alpha7 neuronal nicotinic acetylcholine receptor; also modulates glutamate-GABA-activated chloride channels	265.137	0.846544		370.392	0.880871		3	1.04055	0.921165	0.918993
LOPAC Plate_08	D	6	H7250	Histamine dihydrochloride	Histamine		Agonist		Endogenous neurotransmitter	208.988	0.870362		449.137	1.14936		3	1.32056	0.946967	0.919105
LOPAC Plate_02	H	1	n/a (no compound empty)	n/a (no compound empty)						208.637	1.21411		168.043	0.665575		Batch 1	0.5482	1.32096	0.91911
LOPAC Plate_05	B	11	D5689	DM 235	Nootropic				Potent nootropic agent	97.3346	0.821389		119.874	0.789686		2	0.961403	0.893464	0.91933
LOPAC Plate_12	D	7	P1675	Picrotoxin	GABA		Antagonist	GABA-C	GABA-C receptor antagonist; powerful, nonspecific CNS stimulant isolated from Anamirta cocculin	330.357	0.852379		290.555	0.716569		3	0.84067	0.92715	0.919354
LOPAC Plate_05	G	8	D3634	2,3-Butanedione	Cytoskeleton and ECM	Enzyme	Inhibitor	Myosin ATPase	Reversible myosin ATPase inhibitor	94.2609	0.795451		119.874	0.789686		2	0.992753	0.864651	0.919968
LOPAC Plate_07	D	2	E3256	Edrophonium chloride	Cholinergic	Enzyme	Inhibitor	Acetylcholinesterase	Acetylcholinesterase inhibitor	148.949	0.820156		150.373	0.633636		2	0.77258	0.890975	0.920515
LOPAC Plate_09	F	6	I160	3-(1H-Imidazol-4-yl)propyl di(p-fluorophenyl)methyl ether hydrochloride	Histamine		Antagonist	H3	H3 Histamine receptor antagonist	261.09	0.833619		390.632	0.929004		3	1.11442	0.905265	0.920857
LOPAC Plate_12	D	8	P2278	1,3-Dimethyl-8-phenylxanthine	Adenosine		Antagonist	A1	Selective A1 adenosine receptor antagonist	350.258	0.903727		350.258	0.86381		3	0.95583	0.980839	0.921382
LOPAC Plate_12	D	6	P0453	Piceatannol	Phosphorylation	Enzyme	Inhibitor	Syk / Lck	Non-receptor kinase Syk and Lck inhibitor	338.317	0.872918		274.634	0.677305		3	0.775909	0.946967	0.921805
LOPAC Plate_05	D	5	C223	Cirazoline hydrochloride	Adrenoceptor		Agonist	alpha1A	Selective alpha1 adrenoceptor agonist; non-selective imidazoline binding site ligand	100.408	0.847327		122.948	0.809934		2	0.955869	0.919107	0.921903
LOPAC Plate_08	C	2	G017	(±)-AMPA hydrobromide	Glutamate		Agonist	AMPA/kainate	Potent excitatory amino acid that interacts selectively with central AMPA/kainate glutamate receptors	208.988	0.870362		351.305	0.899007		3	1.03291	0.943888	0.922102
LOPAC Plate_05	A	11	D5564	Daphnetin	Phosphorylation	Enzyme	Inhibitor	PK	Protein kinase (PK) inhibitor	115.777	0.977019		119.874	0.789686		2	0.80826	1.05926	0.922362
LOPAC Plate_16	G	11	O7389	Olprinone hydrochloride	Phosphodiesterase	Enzyme	Inhibitor	PDE3	Selective phosphodiesterase 3 (PDE3) inhibitor.	163.146	0.912091		300.73	1.12296		3	1.2312	0.988289	0.922899
LOPAC Plate_06	C	5	D9175	Dantrolene sodium	Intracellular Calcium		Inhibitor	Release	Inhibits intracellular Ca2+ release from the sarcoplasmic reticulum; muscle relaxant.	219.679	0.738188		235.559	0.712		2	0.964524	0.799787	0.922981
LOPAC Plate_11	H	4	E5406	Ethopropazine hydrochloride	Neurotransmission	Enzyme	Inhibitor	Butyrylcholinesterase	Butyrylcholinesterase inhibitor; antiparkinsonian	298.515	0.805369		378.119	0.838853		3	1.04158	0.872072	0.923512
LOPAC Plate_04	E	2	C3270	Cephalosporin C zinc salt	Antibiotic			Cell wall synthesis	Antibiotic; interferes with cell wall synthesis	180.076	0.868401		315.397	0.904497		2	1.04157	0.940319	0.923518
LOPAC Plate_11	F	8	N4779	5-Nitro-2-(3-phenylpropylamino)benzoic acid	Cl- Channel		Blocker		Potent Cl- channel blocker	298.515	0.805369		425.881	0.944814		3	1.17314	0.871692	0.923915
LOPAC Plate_11	H	11	N142	NO-711 hydrochloride	GABA		Inhibitor	Uptake	Potent and selective GABA uptake inhibitor.	398.02	1.07383		461.703	1.02428		3	0.953864	1.16212	0.924023
LOPAC Plate_05	D	4	C145	2-Chloroadenosine triphosphate tetrasodium	P2 Receptor		Agonist	P2Y	P2Y receptor agonist	91.1872	0.769512		113.727	0.749189		2	0.97359	0.832725	0.92409
LOPAC Plate_13	C	1	n/a (no compound empty)	n/a (no compound empty)						194.594	0.883958		186.732	0.523441		3	0.592156	0.9565	0.924159
LOPAC Plate_08	H	3	H1252	4-Hydroxy-3-methoxyphenylacetic acid	Dopamine		Metabolite		Dopamine metabolite	204.541	0.851842		351.305	0.899007		3	1.05537	0.921625	0.924283
LOPAC Plate_07	A	5	E101	S-(-)-Eticlopride hydrochloride	Dopamine		Antagonist	D2	Potent and selective D2 dopamine receptor antagonist	170.026	0.936215		175.665	0.740215		2	0.790646	1.01206	0.925062
LOPAC Plate_03	F	11	C2505	Corticosterone	Hormone			Glucocorticoid	Glucocorticoid secreted by the adrenal cortex; activates both mineralcorticoid and glucocorticoid receptors	103.196	0.902948		287.501	1.08725		2	1.20411	0.97573	0.925407
LOPAC Plate_04	E	1	n/a (no compound empty)	n/a (no compound empty)						202.278	0.975465		191.177	0.548258		2	0.562048	1.05352	0.925911
LOPAC Plate_02	G	8	S0568	SB 200646 hydrochloride	Serotonin		Antagonist	5-HT2C/2B	5-HT 2C/2B serotonin receptor antagonist.	137.588	0.800656		159.015	0.629816		Batch 1	0.786624	0.864651	0.925988
LOPAC Plate_04	F	9	C8011	Chelidamic acid	Glutamate	Enzyme	Inhibitor	L-glutamic decarboxylase	L-glutamic decarboxylase inhibitor	168.976	0.81487		267.294	0.766548		2	0.9407	0.879879	0.926116
LOPAC Plate_05	F	6	D1064	Dihydrokainic acid	Glutamate		Blocker	Kainate	Non-transportable glutamate analog that blocks glutamate receptors	91.1872	0.769512		122.948	0.809934		2	1.05253	0.830771	0.926263
LOPAC Plate_05	H	11	D5891	1,1-Dimethyl-4-phenyl-piperazinium iodide	Cholinergic		Agonist		Nicotinic acetylcholine receptor agonist	118.85	1.00296		126.022	0.830182		2	0.827734	1.08268	0.926363
LOPAC Plate_14	H	6	S1438	Sulindac sulfone	Prostaglandin	Enzyme	Inhibitor		Non-steroidal anti-inflammatory compound (NSAID); metabolite of sulindac	195.882	0.933333		275.834	0.816569		3	0.874895	1.00748	0.926404
LOPAC Plate_07	G	10	G3126	L-Glutamine	Glutamate		Agonist		Excitatory amino acid	153.164	0.843368		217.821	0.917846		2	1.08831	0.910343	0.926428
LOPAC Plate_09	G	8	C5493	CyPPA	K+ Channels		Modulator	SK3 and SK2	CyPPA is a positive modulator of small conductance Ca2+-activated K2+ channels; selective for SK3 and SK2.	269.185	0.859468		342.057	0.813483		3	0.946496	0.927628	0.926523
LOPAC Plate_16	F	2	SML0218	Bropirimine	Immunomodulators				Bropirimine is an immunostimulating agent	171.008	0.956046		292.868	1.09361		3	1.14388	1.03158	0.926779
LOPAC Plate_08	H	10	I0782	Imazodan	Cyclic Nucleotides	Enzyme	Inhibitor	PDE II	Selective phosphodiesterase II (PDEII) inhibitor	226.775	0.944441		369.093	0.944527		3	1.00009	1.01868	0.927125
LOPAC Plate_04	H	1	n/a (no compound empty)	n/a (no compound empty)						254.08	1.22528		217.078	0.622538		2	0.508079	1.32096	0.927565
LOPAC Plate_04	E	7	C6506	(±)-p-Chlorophenylalanine	Neurotransmission	Enzyme	Inhibitor	Tryptophan hydroxylase	Depletes brain serotonin by irreversible inhibition of tryptophan hydroxylase.	146.775	0.707807		270.995	0.77716		2	1.09798	0.763061	0.927589
LOPAC Plate_01	A	5	A1260	Amantadine hydrochloride	Dopamine		Releaser		Dopamine releaser used in the treatment of Parkinsonism and drug- related extrapyramidal reactions; antiviral (Influenza A)	193.991	0.939052		182.799	0.963167		Batch 1	1.02568	1.01206	0.927866
LOPAC Plate_05	H	8	D3648	N,N,N',N'-Tetramethylazodicarboxamide	Cell Stress		Modulator	Thiols	Thiol-oxidizing agent	109.629	0.925143		141.39	0.931424		2	1.00679	0.995717	0.929122
LOPAC Plate_04	E	4	C4520	Cephalothin sodium	Antibiotic			Cell wall synthesis	Semi-synthetic cephalosporin antibiotic; interferes with cell wall synthesis	143.074	0.689963		252.494	0.724102		2	1.04948	0.742456	0.929298
LOPAC Plate_05	E	8	D2926	Diphenyleneiodonium chloride	Nitric Oxide	Enzyme	Inhibitor	eNOS	Endothelial nitric oxide synthase inhibitor	85.0398	0.717635		89.1373	0.587202		2	0.818246	0.77167	0.929977
LOPAC Plate_12	F	3	O0250	(±)-Octopamine hydrochloride	Adrenoceptor		Agonist	alpha	Neurotransmitter	354.238	0.913997		350.258	0.86381		3	0.94509	0.981998	0.930752
LOPAC Plate_05	G	10	D5385	1,7-Dimethylxanthine	Adenosine		Antagonist	A1 > A2	Adenosine receptor ligand; major metabolite of caffeine	100.408	0.847327		126.022	0.830182		2	0.979766	0.910343	0.930778
LOPAC Plate_04	A	10	C8138	Chlorpromazine hydrochloride	Dopamine		Antagonist		Dopamine receptor antagonist; anti-emetic; antipsychotic	194.877	0.939777		382.001	1.0955		2	1.16571	1.00949	0.930946
LOPAC Plate_06	G	9	SML0252	(+/-)-Anisodamine	Cholinergic		Antagonist	muscarinic	(+/-)-Anisodamine is a muscarinic receptor antagonist	235.559	0.791551		275.26	0.832		2	1.0511	0.850024	0.93121
LOPAC Plate_08	D	3	H0126	DL-Homatropine hydrobromide	Cholinergic		Antagonist	Muscarinic	Muscarinic acetylcholine receptor antagonist	240.116	1		404.668	1.03557		3	1.03557	1.07315	0.93184
LOPAC Plate_07	A	9	F9427	Fexofenadine hydrochloride	Histamine		Antagonist	H1	H1 Histamine receptor antagonist	191.103	1.05227		150.373	0.633636		2	0.602158	1.129	0.932038
LOPAC Plate_12	F	10	P6499	PNU-282987	Cholinergic		Agonist	Nicotinic alpha7	Selective alpha7 nicotinic acetylcholine receptor (nAChR) agonist.	366.178	0.944806		358.218	0.883442		3	0.935051	1.01319	0.932509
LOPAC Plate_13	C	9	PZ0110	SC-57461A	Lipids	Enzyme	Inhibitor	leukotriene A4 hydrolase	SC-57461A is an inhibitor of leukotriene A4 hydrolase	214.25	0.973244		308.591	0.865031		3	0.888812	1.04357	0.932608
LOPAC Plate_04	D	6	L4545	L-798106	Lipids		Antagonist	EP3	L-798106 was among the first EP3-selective antagonists	143.074	0.689963		219.192	0.628599		2	0.911063	0.73977	0.932672
LOPAC Plate_04	H	5	C5270	Cinnarizine	Ca2+ Channel		Blocker		Ca2+ channel blocker; central and peripheral vasodilator	194.877	0.939777		382.001	1.0955		2	1.16571	1.00746	0.93282
LOPAC Plate_15	D	10	T6154	Trazodone hydrochloride	Serotonin		Inhibitor	Reuptake	Atypical antidepressant	178.87	0.989162		277.143	0.954317		3	0.964774	1.05913	0.933938
LOPAC Plate_08	G	3	H0879	Hexamethonium bromide	Cholinergic		Antagonist	Nicotinic	Blocks nicotinic acetylcholine receptors at autonomic ganglia	208.988	0.870362		342.411	0.876248		3	1.00676	0.931656	0.934209
LOPAC Plate_10	G	4	M1809	MRS 1523	Adenosine		Antagonist	A3	Selective A3 adenosine receptor antagonist in rat	244.898	0.82175		423.005	0.924782		3	1.12538	0.879611	0.93422
LOPAC Plate_02	D	10	A254	AIDA	Glutamate		Antagonist	mGluR1	Selective mGluR1 metabotropic glutamate receptor antagonist	164.654	0.958162		169.165	0.670017		Batch 1	0.699273	1.02453	0.935223
LOPAC Plate_04	D	4	C4479	9-cyclopentyladenine	Cyclic Nucleotides	Enzyme	Inhibitor	Adenylate cyclase	Cell-permeable, non-competitive adenylyl cyclase inhibitor; targets the P-site domain	161.575	0.779182		289.496	0.830217		2	1.0655	0.832725	0.935702
LOPAC Plate_03	B	5	B7777	Budesonide	Hormone			Cortisol	Anti-inflammatory glucocorticoid	110.294	0.965061		202.316	0.765101		2	0.7928	1.03125	0.93582
LOPAC Plate_09	G	3	I7379	Imipramine hydrochloride	Serotonin		Blocker	Reuptake	Tricyclic antidepressant; blocks reuptake of serotonin and norepinephrine	273.233	0.872392		350.152	0.832737		3	0.954544	0.931656	0.936389
LOPAC Plate_04	C	8	C7005	DL-Cycloserine	Sphingolipid	Enzyme	Inhibitor	Ketosphinganine synthase, Alanine aminotransferase	Alanine aminotransferase inhibitor; blocks sphingosine biosynthesis by inhibition of ketosphinganine synthetase	165.276	0.797026		270.995	0.77716		2	0.975074	0.85073	0.936873
LOPAC Plate_09	B	1	n/a (no compound empty)	n/a (no compound empty)						261.09	0.833619		289.425	0.688314		3	0.825693	0.88975	0.936914
LOPAC Plate_12	D	12	n/a (no compound empty)	n/a (no compound empty)						382.099	0.985884		409.961	1.01105		3	1.02553	1.05198	0.937171
LOPAC Plate_16	C	9	V100	(±)-Vesamicol hydrochloride	Cholinergic		Inhibitor	ACh storage	Potent inhibitor of vesicular acetylcholine storage	174.939	0.978023		241.763	0.902776		3	0.923062	1.04357	0.937187
LOPAC Plate_07	G	9	F131	FPL 64176	Ca2+ Channel		Activator	L-type	Potent L-type Ca2+ channel activator	144.733	0.796944		158.803	0.669162		2	0.83966	0.850024	0.937554
LOPAC Plate_07	B	4	N3911	NBI 27914	Neurotransmission		Antagonist	CRF1	CRF1 corticotropin-releasing factor receptor antagonist.	144.733	0.796944		154.588	0.651399		2	0.817371	0.849903	0.937689
LOPAC Plate_11	H	6	N1530	Nomifensine maleate	Dopamine		Inhibitor	Reuptake	Dopamine reuptake inhibitor; antidepressant	350.258	0.944967		417.921	0.927154		3	0.981149	1.00748	0.937951
LOPAC Plate_12	E	5	SML0557	SC-514	Phosphorylation	Enzyme	Inhibitor	IKK-2	SC-514 is a cell-permeable, potent and selective ATP competitive inhibitor of nuclear factor kappa-B kinase-2 (IKK-2).	338.317	0.872918		354.238	0.873626		3	1.00081	0.930035	0.938587
LOPAC Plate_09	C	1	n/a (no compound empty)	n/a (no compound empty)						281.329	0.898241		240.85	0.572792		3	0.637682	0.9565	0.939092
LOPAC Plate_10	E	2	B175	BW 723C86	Serotonin		Agonist	5-HT2B	5-HT2B serotonin receptor agonist.	293.473	0.984742		459.436	1.00443		3	1.01999	1.04844	0.939241
LOPAC Plate_11	E	1	n/a (no compound empty)	n/a (no compound empty)						382.099	1.03087		246.772	0.547462		3	0.531067	1.09737	0.939407
LOPAC Plate_16	G	1	n/a (no compound empty)	n/a (no compound empty)						167.077	0.934068		320.39	1.19638		3	1.28082	0.994314	0.93941
LOPAC Plate_01	B	7	Y4877	YM 976	Cyclic nucleotides	Enzyme	Inhibitor	PDE 4	Phosphodiesterase type IV (PDE4) inhibitor. Exhibits anti-inflammatory activity without emesis.	167.877	0.812641		279.795	1.47423		Batch 1	1.81413	0.864772	0.939718
LOPAC Plate_10	A	2	T5576	TMPH hydrochloride	Cholinergic		Inhibitor	Nicotinic	Potent inhibitor of neuronal nicotinic receptors. Subtype specific (alpha3/4 and beta 2/4 combinations).	317.76	1.06624		402.765	0.880534		3	0.825833	1.13449	0.93984
LOPAC Plate_16	B	5	T123	Thioperamide maleate	Histamine		Antagonist	H3	Potent and selective H3 histamine receptor antagonist that crosses the blood brain barrier	163.146	0.912091		273.212	1.02021		3	1.11854	0.970281	0.940027
LOPAC Plate_07	H	8	F9397	Flutamide	Hormone		Inhibitor	Androgen	Non-steroidal anti-androgen	170.026	0.936215		179.881	0.757978		2	0.809619	0.995717	0.940242
LOPAC Plate_16	D	2	T7665	Tyrphostin 51	Phosphorylation	Enzyme	Inhibitor	EGFR	EGFR tyrosine kinase inhibitor	174.939	0.978023		288.936	1.07893		3	1.10317	1.04016	0.940265
LOPAC Plate_05	C	6	D0540	DNQX	Glutamate		Antagonist	Kainate/quisqualate	Potent, competitive kainate/quisqualate glutamate receptor antagonist	81.9661	0.691697		116.801	0.769437		2	1.11239	0.735625	0.940285
LOPAC Plate_01	C	10	A5922	Amifostine	Cell Stress		Inhibitor	Cytoprotectant	Radioprotective agent; selectively protects normal tissues from the damaging effects of anti-neoplastic radiation therapy	167.877	0.812641		205.183	1.08111		Batch 1	1.33036	0.864173	0.940368
LOPAC Plate_13	C	6	P9375	1,10-Phenanthroline monohydrate	Biochemistry	Enzyme	Inhibitor	Metalloprotease	Metalloprotease inhibitor; chelates iron, zinc and other divalent metals	202.457	0.919672		292.867	0.820953		3	0.892658	0.977727	0.940623
LOPAC Plate_02	C	8	PZ0015	Trovafloxacin mesylate	Immunomodulators and Antibiotics	Enzyme	Inhibitor	DNA gyrase and topoisomerase IV	Trovafloxacin mesylate is a broad spectrum antibiotic. Trovafloxacin mesylate blocks the activity of DNA gyrase and topoisomerase IV, enzymes essential in the repliction, transcription, and repair of bacterial DNA.	137.588	0.800656		125.182	0.495812		Batch 1	0.619257	0.85073	0.94114
LOPAC Plate_03	F	2	B2417	Benzamil hydrochloride	Ion Pump		Blocker	Na+/H+, Na+/Ca2+ Pump	Selective and potent blocker of Na+/H+ and Na+/Ca2+ channels	110.294	0.965061		283.952	1.07383		2	1.1127	1.02507	0.941457
LOPAC Plate_07	F	7	F6627	5-Fluorouracil	Cell Cycle	Enzyme	Inhibitor	Thymidylate synthetase	Thymidylate synthetase inhibitor; leads to accumulation of cells in S phase	148.949	0.820156		213.605	0.900083		2	1.09745	0.871111	0.941505
LOPAC Plate_06	D	1	n/a (no compound empty)	n/a (no compound empty)						299.081	1.005		271.29	0.82		2	0.815918	1.06674	0.942123
LOPAC Plate_09	E	4	C1618	Cibenzoline succinate	K+ Channels		Blocker	ATP-sensitive	Blocks ATP-sensitive K channels in heart and pancreatic cells; class IA antiarrhythmic drug.	269.185	0.859468		321.817	0.765349		3	0.890492	0.912084	0.942313
LOPAC Plate_12	E	6	P0547	Pentamidine isethionate	Glutamate		Antagonist	NMDA	NMDA glutamate receptor antagonist; neuroprotective agent; antimicrobial agent prescribed for the treatment of AIDS-associated Pneumocystis carinii pneumonia	394.04	1.01669		310.456	0.76565		3	0.753078	1.07884	0.942399
LOPAC Plate_03	G	3	B5016	Bepridil hydrochloride	Ca2+ Channel		Blocker		Non-selective Ca2+ channel blocker which stimulates the binding of 1,4-dihydropyridine-based drugs to Ca2+ channels; anti-anginal	106.745	0.934004		266.205	1.00671		2	1.07784	0.990874	0.942607
LOPAC Plate_01	E	1	n/a (no compound empty)	n/a (no compound empty)						205.183	0.993228		171.608	0.904197		Batch 1	0.910362	1.05352	0.942772
LOPAC Plate_13	F	10	S8197	SMER28	Cell Biology		Enhancer	Autophagy	Small molecule modulator of mammalian autophagy.	210.319	0.955387		351.833	0.986246		3	1.0323	1.01319	0.942953
LOPAC Plate_10	B	2	L109	Lorglumide sodium	Cholecystokinin		Antagonist	CCK-A	Potent and selective non-peptide cholecystokinin (CCK) receptor antagonist; orally active	265.137	0.889663		467.532	1.02213		3	1.14889	0.943127	0.943313
LOPAC Plate_02	A	4	A8723	Altretamine	DNA Metabolism		Inhibitor		Antineoplastic	157.887	0.918786		236.831	0.938023	Edge effect	Batch 1	1.02094	0.973718	0.943585
LOPAC Plate_16	B	2	T7508	Tetracaine hydrochloride	Na+ Channel		Modulator		Local anesthetic	159.215	0.890113		273.212	1.02021		3	1.14616	0.943127	0.94379
LOPAC Plate_12	A	11	P5514	Pyrilamine maleate	Histamine		Antagonist	H1	H1 Histamine receptor antagonist	429.862	1.10912		346.277	0.853994		3	0.769974	1.17512	0.943834
LOPAC Plate_07	B	11	B7273	Bezafibrate	Transcription		Agonist	PPAR	Bezafibrate is a peroxisome proliferator-activated receptor agonist for PPAR-alpha PPAR-delta and PPAR-gamma Lipoprotein lipase (LPL) activator.	153.164	0.843368		158.803	0.669162		2	0.79344	0.893464	0.94393
LOPAC Plate_06	D	3	D7909	Dicyclomine hydrochloride	Cholinergic		Antagonist	Muscarinic	Competitive muscarinic acetylcholine receptor antagonist	251.44	0.844914		283.2	0.856		2	1.01312	0.895008	0.944029
LOPAC Plate_08	C	3	G154	Gabapentin	Anticonvulsant				Anticonvulsant that may modulate certain types of Ca2+ channel currents; analgesic	217.882	0.907401		351.305	0.899007		3	0.99075	0.96115	0.944079
LOPAC Plate_06	F	9	D14204	1,10-Diaminodecane	Glutamate		Agonist (inverse)	NMDA-polyamine	Inverse agonist at the polyamine recognition site of the NMDA glutamate receptors	247.47	0.831573		271.29	0.82		2	0.986083	0.879879	0.945099
LOPAC Plate_13	G	10	Q1250	Quinine sulfate	K+ Channel		Antagonist		K+ channel blocker; antimalarial, anticholinergic, antihypertensive and hypoglycemic agent; alkaloid isolated from the bark of the Cinchona family of South American trees	206.388	0.93753		375.42	1.05236		3	1.12248	0.991884	0.945201
LOPAC Plate_02	F	4	A9256	L-Aspartic acid	Glutamate		Agonist		Endogenous excitatory amino acid neurotransmitter	137.588	0.800656		169.165	0.670017		Batch 1	0.836834	0.846552	0.945786
LOPAC Plate_08	A	10	H168	R-(+)-7-Hydroxy-DPAT hydrobromide	Dopamine		Agonist	D3	Selective D3 dopamine receptor agonist; active enantiomer of (±)-7-hydroxy-DPAT	240.116	1		386.88	0.990046		3	0.990046	1.05643	0.946581
LOPAC Plate_02	E	1	n/a (no compound empty)	n/a (no compound empty)						171.421	0.997539		144.36	0.571772		Batch 1	0.573183	1.05352	0.946864
LOPAC Plate_08	G	4	B5437	Bendamustine hydrochloride	Apoptosis				DNA-alkylator with a distinct pattern of activity. Bendamustine activates DNA-damage stress response and apoptosis; inhibits mitotic checkpoints; and induces mitotic catastrophe. DNA-alkylator with a distinct pattern of activity. Bendamustine activ...	200.094	0.833322		342.411	0.876248		3	1.05151	0.879611	0.947375
LOPAC Plate_13	B	5	P8813	Protriptyline hydrochloride	Adrenoceptor		Blocker	Reuptake	Norepinephrine reuptake blocker	202.457	0.919672		328.247	0.920129		3	1.0005	0.970281	0.947841
LOPAC Plate_09	E	1	n/a (no compound empty)	n/a (no compound empty)						325.856	1.04041		301.569	0.717194		3	0.689339	1.09737	0.948096
LOPAC Plate_01	A	10	A5909	N-Acetylprocainamide hydrochloride	Na+ Channel		Blocker		Blocks Na+ channels and appears to have Class III anti-arrhythmic activity; metabolite of Procainamide	197.722	0.957111		171.608	0.904197	Edge effect	Batch 1	0.944716	1.00949	0.948117
LOPAC Plate_02	C	2	SML0476	Rabeprazole sodium	Ion Channels		Inhibitor	Proton pump	Rabeprazole sodium is gastric proton pump inhibitor.	147.737	0.859721	Possibly	115.032	0.455611		Batch 1	0.529953	0.906539	0.948355
LOPAC Plate_01	A	1	n/a (no compound empty)	n/a (no compound empty)						246.22	1.19187		290.987	1.5332		Batch 1	1.28638	1.25613	0.948846
LOPAC Plate_01	D	8	A4669	Acyclovir	Immune System	Enzyme	Inhibitor	Viral DNA synthesis	Antiviral agent	152.955	0.740406		171.608	0.904197		Batch 1	1.22122	0.779857	0.949412
LOPAC Plate_16	F	7	C0993	Wiskostatin	Actin	Enzyme	Inhibitor	N-WASP	Wiskostatin is a selective inhibitor of N-WASP, a ubiquitously expressed member of the Wiskott-Aldrich Syndrome protein (WASp) family that regulates actin polymerization	155.284	0.868136		261.419	0.976172		3	1.12445	0.914334	0.949474
LOPAC Plate_14	H	5	T6950	Tizanidine hydrochloride	Adrenoceptor		Agonist	alpha2	alpha2-adrenoceptor agonist.	195.882	0.933333		295.822	0.87574		3	0.938293	0.982953	0.94952
LOPAC Plate_10	B	4	M1404	Nocodazole	Cytoskeleton and ECM		Inhibitor	beta-tubulin	Disrupts microtubules by binding to beta-tubulin	305.616	1.02549		451.34	0.98673		3	0.962203	1.07996	0.949562
LOPAC Plate_02	C	11	SML0113	Brequinar sodium salt hydrate	DNA-RNA transcription regulators	Enzyme	Inhibitor	DHODH	Brequinar inhibits dihydroorotate dehydrogenase (DHODH), the fourth enzyme in the de novo pyrimidine biosynthesis pathway, preventing the synthesis of DNA and RNA	140.971	0.820345		189.465	0.750419		Batch 1	0.91476	0.863641	0.949868
LOPAC Plate_09	H	1	n/a (no compound empty)	n/a (no compound empty)						285.377	0.911165		293.473	0.69794		3	0.765987	0.958922	0.950197
LOPAC Plate_12	D	10	P4670	Propafenone hydrochloride	K+ Channel		Blocker	hKv1.5	Blocks hKv1.5 and ATP-sensitive K+ channels; beta-adrenoceptor antagonist	390.06	1.00642		350.258	0.86381		3	0.858296	1.05913	0.950236
LOPAC Plate_04	F	5	C5134	2-Chloroadenosine	Adenosine		Agonist	A1 > A2	Adenosine receptor agonist with selectivity for A1 over A2	165.276	0.797026		293.196	0.840828		2	1.05496	0.838028	0.951073
LOPAC Plate_09	D	4	I8250	3-Iodo-L-tyrosine	Neurotransmission	Enzyme	Inhibitor	Tyrosine hydroxylase	Tyrosine hydroxylase inhibitor	293.473	0.937014		293.482	0.697962		3	0.744879	0.984444	0.951821
LOPAC Plate_08	F	7	H8653	(±)-7-Hydroxy-DPAT hydrobromide	Dopamine		Agonist	D3	Selective D3 dopamine receptor agonist	208.988	0.870362		391.327	1.00143		3	1.15059	0.914334	0.951908
LOPAC Plate_09	G	2	SML0195	Mifamurtide	Immune cell signaling		immunostimulant		Mifamurtide (Muramyl tripeptide phosphatidylethanolamine; MTP-cephalin; MTP-PE) is a synthetic, lipophilic analog of muramyl dipeptide	281.329	0.898241		293.482	0.697962		3	0.777032	0.94356	0.95197
LOPAC Plate_13	A	2	P6656	Promazine hydrochloride	Dopamine		Antagonist	D2	D2 dopamine receptor antagonist; phenothiazine antipsychotic	237.837	1.08039		320.385	0.89809		3	0.831266	1.13449	0.952312
LOPAC Plate_13	D	6	P9391	Procainamide hydrochloride	Na+ Channel		Antagonist		Na+ channel blocker and Class I anti-arrhythmic	198.526	0.901815		312.522	0.876051		3	0.971431	0.946967	0.95232
LOPAC Plate_15	H	2	S006	Ketanserin tartrate	Serotonin		Antagonist	5-HT2	Selective 5-HT2 serotonin receptor blocker	178.87	0.989162		281.074	0.967853		3	0.978458	1.03784	0.953097
LOPAC Plate_14	H	1	n/a (no compound empty)	n/a (no compound empty)						191.884	0.914286		207.875	0.615384		3	0.673076	0.958922	0.953451
LOPAC Plate_03	G	4	B7148	Buspirone hydrochloride	Serotonin		Agonist	5-HT1A	5-HT1A Serotonin receptor agonist; non-benzodiazepine anxiolytic	96.0968	0.840834		209.415	0.791946		2	0.941858	0.881523	0.953843
LOPAC Plate_09	F	7	K1888	K 185	Melatonin		Antagonist		Melatonin receptor antagonist	273.233	0.872392		370.392	0.880871		3	1.00972	0.914334	0.954129
LOPAC Plate_12	F	1	n/a (no compound empty)	n/a (no compound empty)						362.198	0.934536		278.614	0.687121		3	0.735254	0.979213	0.954375
LOPAC Plate_11	E	6	N0630	Niflumic acid	Prostaglandin	Enzyme	Inhibitor	COX-2	Selective prostaglandin H synthase 2 (PGHS-2) inhibitor	382.099	1.03087		290.555	0.644593		3	0.625288	1.07884	0.955542
LOPAC Plate_13	B	11	Q3504	Quazinone	Cyclic Nucleotides	Enzyme	Inhibitor	PDE III	Phosphodiesterase III (PDE III) inhibitor	226.043	1.02682		438.318	1.22868		3	1.19659	1.07452	0.955608
LOPAC Plate_01	C	2	190047	S(-)-p-Bromotetramisole oxalate	Phosphorylation	Enzyme	Inhibitor	Alkaline phosphatase	Potent alkaline phosphatase inhibitor	179.069	0.866817		246.22	1.29733		Batch 1	1.49666	0.906539	0.956183
LOPAC Plate_07	C	7	F6300	Flumazenil	Benzodiazepine		Antagonist		Benzodiazepine receptor antagonist	161.595	0.889791		150.373	0.633636		2	0.712117	0.930369	0.956385
LOPAC Plate_04	D	9	C7912	Cefotaxime sodium	Antibiotic			Cell wall synthesis	Broad spectrum third generation cephalosporin antibiotic; interferes with cell wall synthesis	172.676	0.832714		233.993	0.671045		2	0.805853	0.870488	0.956606
LOPAC Plate_13	D	3	P7780	Propionylpromazine hydrochloride	Dopamine		Antagonist	D2	D2 dopamine receptor antagonist; phenothiazine antipsychotic	226.043	1.02682		414.731	1.16256		3	1.1322	1.07315	0.956829
LOPAC Plate_09	F	1	n/a (no compound empty)	n/a (no compound empty)						293.473	0.937014		378.479	0.900102		3	0.960607	0.979213	0.956905
LOPAC Plate_16	E	5	H9415	5HPP-33	Cytoskeleton and extracellular matrix		Inhibitor	microtubules	5HPP-33 is a thalidomide derivative which was reported to be active as anticancer agent through stabilization of the microtubules	159.215	0.890113		249.626	0.932134		3	1.04721	0.930035	0.957076
LOPAC Plate_04	A	6	R7772	Roscovitine	Phosphorylation	Enzyme	Inhibitor	CDK	Potent, selective inhibitor of cyclin-dependent kinases (CDKs)	187.477	0.904089		459.705	1.31834		2	1.4582	0.943797	0.957928
LOPAC Plate_05	F	10	G7795	Ganaxolone	GABA		Modulator	GABA-A	Positive allosteric modulator of GABA-A receptors	97.3346	0.821389		119.874	0.789686		2	0.961403	0.85721	0.958212
LOPAC Plate_04	B	1	n/a (no compound empty)	n/a (no compound empty)						209.678	1.01115		172.676	0.495201		2	0.489739	1.05442	0.95897
LOPAC Plate_12	G	3	O0383	N-Oleoylethanolamine	Sphingolipid	Enzyme	Inhibitor	Ceramidase	Ceramidase inhibitor; inhibits sphingolipid signaling pathway	346.277	0.893458		282.594	0.696937		3	0.780045	0.931656	0.959
LOPAC Plate_13	F	4	P8511	Tranylcypromine hydrochloride	Neurotransmission	Enzyme	Inhibitor	MAO	MAO inhibitor; antidepressant	194.594	0.883958		308.591	0.865031		3	0.978589	0.921165	0.959609
LOPAC Plate_14	H	4	PZ0101	CP-226269	Dopamine		Agonist	D4	CP-226269 is a D4 dopamine receptor agonist with EC50 of 32 nM	175.894	0.838095		239.856	0.71006		3	0.847231	0.872072	0.961039
LOPAC Plate_08	E	6	H7258	Harmane	Imidazoline		Agonist	I1	I1 imidazoline binding site agonist	249.01	1.03704		404.668	1.03557		3	0.998579	1.07884	0.961258
LOPAC Plate_07	A	4	E8375	(-)-Physostigmine	Cholinergic	Enzyme	Inhibitor	Cholinesterase	Cholinesterase inhibitor	170.026	0.936215		171.45	0.722451		2	0.771673	0.973718	0.961485
LOPAC Plate_03	G	2	B2515	L-Buthionine-sulfoximine	Multi-Drug Resistance	Enzyme	Inhibitor		Glutathione synthesis inhibitor	103.196	0.902948		255.557	0.966443		2	1.07032	0.939034	0.961571
LOPAC Plate_08	D	10	I0157	Ibudilast	Cyclic Nucleotides	Enzyme	Inhibitor	PDE IV	Phosphodiesterase IV (PDE IV) inhibitor	244.563	1.01852		538.075	1.37696		3	1.35192	1.05913	0.961657
LOPAC Plate_13	E	8	P126	Pirenperone	Serotonin		Antagonist	5-HT2	5-HT2 Serotonin receptor antagonist	210.319	0.955387		312.522	0.876051		3	0.916959	0.993333	0.961799
LOPAC Plate_02	F	11	T6951	TBBz	Phosphorylation	Enzyme	Inhibitor	CK2	Cell-permeable casein kinase 2 (CK2) inhibitor.	161.271	0.938474		213.148	0.844221		Batch 1	0.899568	0.97573	0.961817
LOPAC Plate_15	H	5	T1512	Tetramisole hydrochloride	Phosphorylation	Enzyme	Inhibitor	Phosphatase	Inhibits various mammalian alkaline phosphatases (i.e., liver, kidney, placenta, bone and tumor)	171.008	0.945683		296.799	1.022		3	1.0807	0.982953	0.962084
LOPAC Plate_14	H	7	A9861	Auraptene	Cell Signaling		Modulator/Inhibitor	ACAT	Auraptene is an estrogen receptor modulator that also acts as an ACAT inhibitor	187.887	0.895238		267.839	0.7929		3	0.885686	0.929534	0.963104
LOPAC Plate_06	D	2	D6518	Diethylenetriaminepentaacetic acid	Biochemistry	Enzyme	Inhibitor	Zn2+-dependent protease	Zinc-dependent proteases carboxypeptidase A and aminopeptidase N inhibitor; chelating agent	255.41	0.858255		295.111	0.892		2	1.03932	0.890975	0.963275
LOPAC Plate_03	A	3	B3023	Bumetanide	Ion Pump		Inhibitor	Na+-K+-2Cl- cotransporter	Potent inhibitor of the Na+-K+-2Cl- cotransporter; inhibits anthracene-9-carboxylic acid, a blocker of chloride channels	106.745	0.934004		330.094	1.24832		2	1.33653	0.969573	0.963315
LOPAC Plate_12	G	12	n/a (no compound empty)	n/a (no compound empty)						374.139	0.965345		334.337	0.824546		3	0.854146	1.00204	0.963378
LOPAC Plate_11	G	10	N8403	6-Nitroso-1,2-benzopyrone	Transcription	Enzyme	Inhibitor	PARP	Poly(ADP-ribose) polymerase (PARP) ligand which preferentially destabilizes one of the two zinc-fingers inactivating the enzyme	354.238	0.955705		437.822	0.971304		3	1.01632	0.991884	0.963525
LOPAC Plate_10	H	11	D8941	2,6-Difluoro-4-[2-(phenylsulfonylamino)ethylthio]phenoxyacetamide	Glutamate		Agonist	AMPA	Selective, high affinity AMPA ionotropic glutamate receptor agonist; reduces ischemia-induced performance deficits in rats.	333.952	1.12057		475.627	1.03983		3	0.927946	1.16212	0.964244
LOPAC Plate_08	D	11	I1656	Idarubicin	DNA Metabolism		Inhibitor		Antineoplastic	275.691	1.14816		764.867	1.95733		3	1.70476	1.19067	0.964299
LOPAC Plate_11	G	4	M137	Methysergide maleate	Serotonin		Antagonist		Serotonin receptor antagonist; antimigraine	314.436	0.848322		382.099	0.847683		3	0.999247	0.879611	0.964429
LOPAC Plate_04	B	8	C6895	Cefaclor	Antibiotic			Cell wall synthesis	Semi-synthetic cephalosporin antibiotic; interferes with cell wall synthesis	168.976	0.81487		270.995	0.77716		2	0.953722	0.844713	0.96467
LOPAC Plate_02	B	1	n/a (no compound empty)	n/a (no compound empty)						174.804	1.01723		134.211	0.531571		Batch 1	0.522569	1.05442	0.964731
LOPAC Plate_05	F	8	D3630	Diphenhydramine hydrochloride	Histamine		Antagonist	H1	H1 Histamine receptor antagonist	97.3346	0.821389		126.022	0.830182		2	1.01071	0.851165	0.965018
LOPAC Plate_03	E	4	B6506	Benzamidine hydrochloride	Biochemistry	Enzyme	Inhibitor	Peptidase	Peptidase inhibitor	81.8992	0.716607		248.458	0.939597		2	1.31118	0.742456	0.965184
LOPAC Plate_01	F	1	n/a (no compound empty)	n/a (no compound empty)						227.567	1.10158		141.763	0.746946		Batch 1	0.678067	1.14099	0.965457
LOPAC Plate_11	G	5	PZ0117	PF-573228	Kinase/Phosphatase	Enzyme	Inhibitor		PF-573228 is a focal adhesion kinase (FAK) inhibitor; Non-receptor tyrosine kinase inhibitor	330.357	0.891275		421.901	0.935984		3	1.05016	0.92311	0.965514
LOPAC Plate_08	H	1	n/a (no compound empty)	n/a (no compound empty)						222.329	0.925921		311.267	0.796547		3	0.860275	0.958922	0.965585
LOPAC Plate_07	A	3	SML0613	Rofecoxib	Lipid Signaling	Enzyme	Inhibitor	COX-2	Selective cyclooxygenase-2 (COX-2) inhibitor.	170.026	0.936215		163.019	0.686925		2	0.733726	0.969573	0.965595
LOPAC Plate_09	G	7	K2628	Ketotifen fumarate	Histamine		Antagonist	H1	H1 Histamine receptor antagonist	248.946	0.794846		305.626	0.726842		3	0.914444	0.82256	0.966308
LOPAC Plate_11	F	4	M129	L-alpha-Methyl DOPA	Biochemistry	Enzyme	Inhibitor	Aromatic amino acid decarboxylase	L-aromatic amino acid decarboxylase inhibitor; antihypertensive	330.357	0.891275		382.099	0.847683		3	0.95109	0.921165	0.967553
LOPAC Plate_14	C	11	S8139	Sulindac	Prostaglandin	Enzyme	Inhibitor	COX	COX inhibitor; Anti-inflammatory	215.87	1.02857		351.789	1.04142		3	1.01249	1.06285	0.967748
LOPAC Plate_03	G	6	B016	Benoxathian hydrochloride	Adrenoceptor		Antagonist	alpha1	Selective alpha1 adrenoceptor antagonist	103.196	0.902948		220.063	0.832215		2	0.921665	0.932068	0.968757
LOPAC Plate_12	F	5	S3442	SB 216763	Phosphorylation	Enzyme	Inhibitor	GSK-3	Potent, selective, cell permeable inhibitor of glycogen synthetase kinase-3 (GSK-3).	330.357	0.852379		330.357	0.81473		3	0.95583	0.879541	0.969118
LOPAC Plate_16	B	8	U120	U0126	Phosphorylation	Enzyme	Inhibitor	MEK1/MEK2	Specific inhibitor of MEK1 and MEK2 (MAP kinase kinase; MAPKK); also inhibits a constitutively active, mutant form of MEK	167.077	0.934068		198.521	0.741304		3	0.793629	0.963558	0.969395
LOPAC Plate_08	E	8	H9523	Serotonin hydrochloride	Serotonin		Agonist		Endogenous neurotransmitter	231.222	0.96296		377.986	0.967286		3	1.00449	0.993333	0.969424
LOPAC Plate_13	G	6	Z2777	Ziprasidone hydrochloride monohydrate	Neurotransmission		Antipsychotic		Atypical antipsychotic; FDA approved for the treatment of schizophrenia.	210.319	0.955387		340.04	0.953187		3	0.997698	0.985245	0.969695
LOPAC Plate_13	D	9	P203	Phenamil methanesulfonate	Na+ Channel		Inhibitor	Amiloride sensitive	Irreversible inhibitor of amiloride-sensitive Na+ channels; derivative of amiloride	218.181	0.991102		359.696	1.00829		3	1.01734	1.02193	0.969837
LOPAC Plate_11	A	1	n/a (no compound empty)	n/a (no compound empty)						390.06	1.05235		298.515	0.662253		3	0.629309	1.08475	0.970132
LOPAC Plate_06	D	9	D138	5,7-Dichlorokynurenic acid	Glutamate		Antagonist	NMDA-glycine	Potent excitatory amino acid receptor antagonist; active at the strychnine-insensitive glycine binding site of the NMDA glutamate receptor	251.44	0.844914		231.589	0.7		2	0.828487	0.870488	0.970621
LOPAC Plate_13	D	1	n/a (no compound empty)	n/a (no compound empty)						222.112	1.00896		214.25	0.600577		3	0.595245	1.03928	0.970827
LOPAC Plate_11	D	1	n/a (no compound empty)	n/a (no compound empty)						374.139	1.0094		242.792	0.538632		3	0.533618	1.03928	0.971248
LOPAC Plate_16	C	3	SML0255	4-DAMP	Cholinergics		Antagonist	M3	4-DAMP is a M3 preferring cholinergic receptor antagonist	167.077	0.934068		292.868	1.09361		3	1.1708	0.96115	0.971824
LOPAC Plate_10	E	9	M5560	(S)-MAP4 hydrochloride	Glutamate		Antagonist	mGluR4,6,7	Selective mGluR4,6,7 metabotropic glutamate receptor antagonist	297.521	0.998324		455.388	0.995579		3	0.99725	1.02718	0.971909
LOPAC Plate_13	H	5	P9178	Prochlorperazine dimaleate	Dopamine		Antagonist		Antipsychotic agent; used in the treatment of spastic gastrointestinal disorders	210.319	0.955387		343.971	0.964207		3	1.00923	0.982953	0.971956
LOPAC Plate_02	C	10	C6617	CBIQ	K+ Channel		Activator	CFTR / KCNN4	Activates cystic fibrosis transmembrane conductance regulator (CFTR) and the intermediate-conductance calcium-sensitive K+ channel.	144.354	0.840033		145.482	0.576214		Batch 1	0.685943	0.864173	0.972065
LOPAC Plate_06	G	10	E0381	Epibestatin hydrochloride	Biochemistry	Enzyme	Inhibitor	Metalloprotease	Metallo-protease inhibitor; aminopeptidase inhibitor	263.35	0.884936		314.961	0.952		2	1.07578	0.910343	0.972091
LOPAC Plate_16	B	3	SML0216	Brinzolamide	anydrases	Enzyme	Inhibitor	anydrase II	Brinzolamide is a carbonic anhydrase II inhibitor used to lower intraocular pressure.	167.077	0.934068		296.799	1.10828		3	1.18651	0.960408	0.972574
LOPAC Plate_13	H	4	P8765	Ammonium pyrrolidinedithiocarbamate	Nitric Oxide	Enzyme	Modulator	NOS	Prevents induction of nitric oxide synthase (NOS) by inhibiting translation of NOS mRNA	186.732	0.848243		359.696	1.00829		3	1.18867	0.872072	0.972676
LOPAC Plate_06	D	7	D047	(±)-SKF-38393 hydrochloride	Dopamine		Antagonist	D1	D1 Dopamine receptor agonist	227.619	0.764869		279.23	0.844		2	1.10346	0.786271	0.97278
LOPAC Plate_01	B	9	A5282	(±)-2-Amino-5-phosphonopentanoic acid	Glutamate		Antagonist	NMDA	NMDA glutamate receptor antagonist	216.375	1.0474		264.873	1.39561		Batch 1	1.33245	1.07663	0.972854
LOPAC Plate_13	F	3	P7912	Phloretin	Ca2+ Channel		Blocker	L-Type	Blocks L-type Ca2+ channels	210.319	0.955387		320.385	0.89809		3	0.940027	0.981998	0.972901
LOPAC Plate_13	C	8	P120	1-Phenylbiguanide	Serotonin		Agonist	5-HT3	5-HT3 Serotonin receptor agonist	202.457	0.919672		277.143	0.776875		3	0.84473	0.945073	0.973123
LOPAC Plate_10	H	4	F7932	Famciclovir	Immune Cell Signaling		Antiviral		Famciclovir is an antiviral	252.994	0.848915		418.957	0.915933		3	1.07894	0.872072	0.973446
LOPAC Plate_06	E	8	N2288	Nefiracetam	Neurotransmission		Nootropic		Pyrrolidonetype nootropic agent with various pharmacologic as well as cognition-enhancing effects.	223.649	0.751529		267.32	0.808		2	1.07514	0.77167	0.973899
LOPAC Plate_04	C	5	C4915	(+)-Chlorpheniramine maleate	Histamine		Antagonist	H1	H1 Histamine receptor antagonist; active isomer	161.575	0.779182		259.894	0.745325		2	0.956548	0.799787	0.974237
LOPAC Plate_11	D	8	N4382	Nalidixic acid sodium	Antibiotic	Enzyme	Inhibitor	DNA Gyrase	Inhibits bacterial DNA polymerase (DNA gyrase)	354.238	0.955705		402	0.891834		3	0.933168	0.980839	0.974375
LOPAC Plate_07	B	7	F6145	Fenspiride hydrochloride	Adrenoceptor		Antagonist	alpha	alpha-Adrenoceptor antagonist; NSAID	153.164	0.843368		141.942	0.598109		2	0.709192	0.864772	0.975249
LOPAC Plate_07	G	8	F8927	Flupirtine maleate	Glutamate		Antagonist	NMDA	NMDA glutamate receptor antagonist; centrally acting analgesic	153.164	0.843368		150.373	0.633636		2	0.751316	0.864651	0.975385
LOPAC Plate_14	C	1	n/a (no compound empty)	n/a (no compound empty)						195.882	0.933333		215.87	0.639052		3	0.684699	0.9565	0.97578
LOPAC Plate_07	B	1	n/a (no compound empty)	n/a (no compound empty)						186.888	1.02906		165.811	0.698688		2	0.678956	1.05442	0.975955
LOPAC Plate_08	H	7	H8876	5-Hydroxyindolacetic acid	Serotonin		Metabolite		Serotonin metabolite	217.882	0.907401		355.752	0.910387		3	1.00329	0.929534	0.976189
LOPAC Plate_06	E	4	D8399	Danazol	Hormone		Inhibitor		Anterior pituitary suppressant; weak androgen	215.709	0.724847		287.171	0.868		2	1.19749	0.742456	0.976283
LOPAC Plate_07	C	11	G6416	GW5074	Phosphorylation	Enzyme	Inhibitor	Raf1 kinase	cRaf1 kinase inhibitor	153.164	0.843368		150.373	0.633636		2	0.751316	0.863641	0.976526
LOPAC Plate_10	H	9	M6191	GW9662	Transcription		Inhibitor	PPAR-gamma	Irreversible peroxisome proliferator-activated receptor-gamma (PPAR-gamma) inhibitor	297.521	0.998324		451.34	0.98673		3	0.988386	1.02216	0.976683
LOPAC Plate_05	A	4	C141	CGS-21680 hydrochloride	Adenosine		Agonist	A2a	A2a adenosine receptor agonist.	112.703	0.951081		138.316	0.911176		2	0.958042	0.973718	0.976752
LOPAC Plate_15	D	11	T7165	Tyrphostin 23	Phosphorylation	Enzyme	Inhibitor	EGFR	Protein tryrosine kinase EGFR inhibitor.	210.319	1.16308		336.11	1.15736		3	0.995088	1.19067	0.976827
LOPAC Plate_14	E	7	T2952	Tetrabenazine	Neurotransmission	Enzyme	Inhibitor	VMAT	Reversible type 2 vesicular monoamine transporter (VMAT) inhibitor. It depletes dopamine stores.	187.887	0.895238		251.849	0.745563		3	0.832809	0.916112	0.977214
LOPAC Plate_08	G	6	H7779	Retinoic acid p-hydroxyanilide	Cell Cycle		Inhibitor		Vitamin A acid analog with antiproliferative activity in cultured human breast cancer cells	231.222	0.96296		360.199	0.921767		3	0.957222	0.985245	0.977382
LOPAC Plate_13	F	2	P7136	Pyrazinecarboxamide	Antibiotic				Antibiotic; tuberculostatic	222.112	1.00896		320.385	0.89809		3	0.890116	1.03158	0.978073
LOPAC Plate_13	A	7	P9879	Procaine hydrochloride	Na+ Channel		Blocker		Na+ channel blocker	249.63	1.13396		308.591	0.865031		3	0.762841	1.15832	0.978965
LOPAC Plate_10	C	6	PZ0211	PF-4778574					PF-4778574 is a potent AMPA receptor positive allosteric modulator (PAM).	285.377	0.957577		329.903	0.721241		3	0.753194	0.977727	0.97939
LOPAC Plate_06	D	8	D126608	Propofol	Cholinergic		Inhibitor	Muscarinic	Short acting general anesthetic	227.619	0.764869		223.649	0.676		2	0.883811	0.779857	0.980781
LOPAC Plate_09	G	1	n/a (no compound empty)	n/a (no compound empty)						305.616	0.975787		257.042	0.611299		3	0.626468	0.994314	0.981367
LOPAC Plate_11	C	10	N7758	Naloxone hydrochloride	Opioid		Antagonist		Opioid receptor antagonist	405.98	1.0953		425.881	0.944814		3	0.862605	1.11607	0.981394
LOPAC Plate_04	F	11	A0487	Argatroban monohydrate	Cell signaling	Enzyme	Inhibitor	Thrombin	Argatroban is a potent, seletive, univalent direct inhibitor of thrombin	198.577	0.957621		330.198	0.946943		2	0.988849	0.97573	0.98144
LOPAC Plate_08	D	5	H4001	Hydrocortisone	Hormone			Cortisol	Primary glucocorticoid secreted by the adrenal cortex	226.775	0.944441		360.199	0.921767		3	0.975993	0.962119	0.981625
LOPAC Plate_02	H	8	A8981	AS-252424	Phosphorylation	Enzyme	Inhibitor	PI3Kgamma	A potent and selective phosphoinositide 3-kinase PI3Kgamma inhibitor.	168.037	0.977851		199.615	0.79062		Batch 1	0.808528	0.995717	0.982057
LOPAC Plate_06	A	10	A5181	Anisotropine methyl bromide	Muscarinic		Antagonist		is a muscarinic antagonist and antispasmodic	295.111	0.991662		231.589	0.7		2	0.705886	1.00949	0.982344
LOPAC Plate_06	D	4	C0256	Cytidine 5'-diphosphocholine sodium salt hydrate	Lipid Signaling	Enzyme	Inhibitor	PLA2	Neuroprotective in situations of hypoxia and ischemic; cerebral vasodilator; inhibits PLA2 activation.	243.499	0.818232		231.589	0.7		2	0.855503	0.832725	0.982596
LOPAC Plate_03	C	3	B3650	Betaine aldehyde chloride	Cholinergic	Enzyme	Metabolite	Choline dehydrogenase	Intermediate in choline-betaine osmoregulatory pathway; product of choline dehydrogenation	113.844	0.996118		283.952	1.07383		2	1.07801	1.01332	0.983022
LOPAC Plate_14	E	5	R121	S(+)-Raclopride L-tartrate	Dopamine		Antagonist	D2	Selective D2 dopamine receptor antagonist	191.884	0.914286		275.834	0.816569		3	0.893122	0.930035	0.983066
LOPAC Plate_07	D	6	F3764	Furegrelate sodium	Phosphorylation	Enzyme	Inhibitor	Thromboxane synthase	Thromboxane synthetase inhibitor	132.087	0.727309		91.3555	0.384951		2	0.529282	0.73977	0.983155
LOPAC Plate_12	D	11	P6126	Phenylephrine hydrochloride	Adrenoceptor		Agonist	alpha1	alpha1 Adrenoceptor agonist; mydriatic; decongestant	453.743	1.17074		557.228	1.37424		3	1.17383	1.19067	0.983263
LOPAC Plate_07	E	7	F6513	Fusaric acid	Dopamine	Enzyme	Inhibitor	Dopamine beta-hydroxylase	Dopamine beta-hydroxylase inhibitor; antibiotic isolated from the fungus Fusarium heterosporium	136.302	0.75052		167.235	0.704688		2	0.938933	0.763061	0.983565
LOPAC Plate_01	B	2	144509	N-Phenylanthranilic acid	Cl- Channel		Blocker		Cl- channel blocker	186.53	0.902935		182.799	0.963167		Batch 1	1.06671	0.917777	0.983828
LOPAC Plate_07	D	7	G4796	Genipin	Cell Biology		Modulator	UCP2	Stimulates insulin secretion in UCP2-dependent manner (Uncoupling protein 2). Genipin is a protein, collagen, gelatin, and chitosan cross-linker.	140.517	0.773732		95.571	0.402715		2	0.520483	0.786271	0.984052
LOPAC Plate_02	E	11	B1381	8-Bromo-cGMP sodium	Cyclic Nucleotides	Enzyme	Activator		Membrane-permeable analog of cGMP	144.354	0.840033		175.932	0.696817		Batch 1	0.829512	0.852984	0.984817
LOPAC Plate_07	F	9	F124	Furafylline	Biochemistry	Enzyme	Inhibitor	P450IA2	Cytochrome P4501A2 inhibitor	157.38	0.866579		167.235	0.704688		2	0.813184	0.879879	0.984884
LOPAC Plate_13	E	6	P9547	Prilocaine hydrochloride	Na+ Channel		Blocker		Na+ channel blocker	233.905	1.06253		320.385	0.89809		3	0.845237	1.07884	0.984887
LOPAC Plate_16	E	10	X1251	Xylazine hydrochloride	Adrenoceptor		Agonist	alpha2	alpha2 Adrenoceptor agonist; anesthetic	178.87	1		269.281	1.00553		3	1.00553	1.01469	0.985524
LOPAC Plate_07	A	1	n/a (no compound empty)	n/a (no compound empty)						224.827	1.23797		165.811	0.698688		2	0.564382	1.25613	0.985542
LOPAC Plate_12	D	3	N183	NBQX disodium	Glutamate		Antagonist	AMPA/kainate	Neuroprotective AMPA/kainate glutamate receptor antagonist; water soluble salt of NBQX	409.961	1.05777		326.376	0.804914		3	0.760952	1.07315	0.985674
LOPAC Plate_10	C	2	SMl0040	Lometrexol hydrate	Apoptosis	Enzyme	Inhibitor	GARFTase	Lometrexate is a potent inhibitor of GARFTase, but does not interfere with enzymes involved in the synthesis of folate	277.281	0.930411		346.095	0.75664		3	0.813232	0.943888	0.985722
LOPAC Plate_09	F	8	SML0644	SANT-2	Gene Regulation	Enzyme	Inhibitor	SMO	SANT-2 is a potent sonic hedgehog pathway (shh) antagonist that directly inhibits by binding to the smoothened receptor.	269.185	0.859468		378.488	0.900124		3	1.0473	0.871692	0.985976
LOPAC Plate_11	E	11	T8703	T0070907	Gene Regulation		Antagonist	PPAR gamma	T0070907 is very similar in structure and activity to the PPARgamma antagonist GW9662. T0070907 is more potent and has higher selectivity for PPAR-gamma over all other subtypes (about 800-fold)	370.159	0.998658		386.079	0.856513		3	0.857664	1.01263	0.986205
LOPAC Plate_12	B	10	P4651	Promethazine hydrochloride	Histamine		Antagonist	H1	H1 Histamine receptor antagonist; anticholinergic	405.98	1.0475		326.376	0.804914		3	0.768412	1.06114	0.987151
LOPAC Plate_06	E	10	V7264	Venlafaxine hydrochloride	Serotonin		Reuptake	5-HT and NE	Dual serotonin and norepinephrine reuptake inhibitor. Antidepressant.	263.35	0.884936		303.051	0.916		2	1.0351	0.896203	0.987428
LOPAC Plate_12	C	1	n/a (no compound empty)	n/a (no compound empty)						366.178	0.944806		370.159	0.91289		3	0.96622	0.9565	0.987774
LOPAC Plate_11	C	9	N5504	Naphazoline hydrochloride	Adrenoceptor		Agonist	alpha	alpha-Adrenoceptor agonist; imidazoline receptor agonist; vasoconstrictor	382.099	1.03087		417.921	0.927154		3	0.899387	1.04357	0.98783
LOPAC Plate_02	A	7	PZ0022	BLI-489 hydrate	Immune Signaling	Enzyme	Inhibitor		BLI-489 is a penem ß-lactamase inhibitor, which has shown activity against class A, C, and D ß-lactamases	157.887	0.918786		189.465	0.750419	Edge effect	Batch 1	0.81675	0.929653	0.98831
LOPAC Plate_11	E	4	D0943	DFB	Glutamate		Modulator	mGluR5	Positive allosteric modulator of the mGluR5 metabotropic glutamate receptor.	334.337	0.902014		318.416	0.706403		3	0.78314	0.912084	0.988959
LOPAC Plate_09	B	3	I6138	Idazoxan hydrochloride	Imidazoline		Ligand	I1 / I2	I2-imidazoline agonist; I1-imidazoline antagonist; alpha2-Adrenergic antagonist	297.521	0.949938		398.727	0.948258		3	0.998231	0.960408	0.989098
LOPAC Plate_14	E	1	n/a (no compound empty)	n/a (no compound empty)						227.863	1.08571		299.82	0.887573		3	0.817502	1.09737	0.989382
LOPAC Plate_15	B	1	n/a (no compound empty)	n/a (no compound empty)						159.215	0.880466		198.526	0.683605		3	0.776413	0.88975	0.989565
LOPAC Plate_12	C	2	N151	Nisoxetine hydrochloride	Adrenoceptor		Blocker	Reuptake	Potent and selective norepinephrine reuptake blocker	362.198	0.934536		346.277	0.853994		3	0.913816	0.943888	0.990092
LOPAC Plate_10	G	1	n/a (no compound empty)	n/a (no compound empty)						293.473	0.984742		406.814	0.889386		3	0.903166	0.994314	0.990373
LOPAC Plate_08	E	7	H8645	(+)-Hydrastine	GABA		Antagonist	GABA-A	Potent competitive GABA-A receptor antagonist which is more potent than bicuculline; isolated from Corydalis stricta	217.882	0.907401		377.986	0.967286		3	1.066	0.916112	0.990491
LOPAC Plate_06	C	2	D6140	Demeclocycline hydrochloride	Antibiotic			Protein synthesis	Tetracycline antibiotic; interferes with protein synthesis	267.32	0.898277		271.29	0.82		2	0.912859	0.906539	0.990886
LOPAC Plate_06	B	1	n/a (no compound empty)	n/a (no compound empty)						310.991	1.04503		287.171	0.868		2	0.830602	1.05442	0.991094
LOPAC Plate_06	B	10	D1920-6	2,4-Diamino-6-pyrimidinone	Phosphorylation	Enzyme	Inhibitor	GTP cyclohydrolase I	Inhibitor of GTP cyclohydrolase I, the rate-limiting enzyme in tetrahydrobiopterin (BH4) biosynthesis; blocks the induction of nitric oxide synthesis	291.141	0.978321		283.2	0.856		2	0.874968	0.986993	0.991214
LOPAC Plate_01	A	9	PZ0142	PD-180970	Cell signaling/ tyrosine kinase	Enzyme	Inhibitor	p210 Bcr-Abl	PD-180970 is a potent inhibitor of the p210 Bcr-Abl tyrosine kinase.	231.297	1.11964		138.032	0.727289	Edge effect	Batch 1	0.649575	1.129	0.991706
LOPAC Plate_02	D	11	B1266	p-Benzoquinone	DNA Repair		Inhibitor	G:C site	Benzene metabolite; induces mutations in DNA at G:C base pairs; induces writhing in mice; topoisomerase II inhibitor	157.887	0.918786		192.848	0.763819		Batch 1	0.831335	0.926185	0.992011
LOPAC Plate_04	E	9	C7971	Cilostamide	Cyclic Nucleotides	Enzyme	Inhibitor	PDE III	cGMP-inhibited phosphodieserase inhibitor (PDE III)	187.477	0.904089		278.395	0.798382		2	0.883079	0.910595	0.992856
LOPAC Plate_13	C	2	P6902	Pheniramine maleate	Histamine		Antagonist	H1	H1 histamine receptor antagonist.	206.388	0.93753		332.178	0.931148		3	0.993193	0.943888	0.993264
LOPAC Plate_13	G	2	P7295	Primidone	Anticonvulsant				Anticonvulsant	206.388	0.93753		355.764	0.997266		3	1.06372	0.94356	0.993609
LOPAC Plate_16	D	5	A8852	A-68930 hydrochloride	Dopamine		Agonist	D1	Selective D1 dopamine receptor agonist	171.008	0.956046		304.661	1.13764		3	1.18995	0.962119	0.993687
LOPAC Plate_13	E	10	Q0875	Quinidine sulfate	Na+ Channel		Antagonist		Na+ channel blocker and Class I antiarrythmic; alkaloid isolated from the bark of the Cinchona family of South American trees	222.112	1.00896		359.696	1.00829		3	0.999332	1.01469	0.994352
LOPAC Plate_11	G	9	N7261	Nortriptyline hydrochloride	Adrenoceptor		Inhibitor	Uptake	Tricyclic antidepressant	330.357	0.891275		425.881	0.944814		3	1.06007	0.89631	0.994383
LOPAC Plate_05	C	5	T0202	Tocainide hydrochloride	Na+ Channel		Blocker		Sodium channel blocker. Class IB antiarrhythmic.	94.2609	0.795451		119.874	0.789686		2	0.992753	0.799787	0.994578
LOPAC Plate_09	E	7	K1751	Ketoprofen	Prostaglandin	Enzyme	Inhibitor	COX-1	COX-1 selective non-steroidal anti-inflammatory (NSAID) drug	285.377	0.911165		297.53	0.707589		3	0.776576	0.916112	0.9946
LOPAC Plate_16	E	9	W1628	Wortmannin from Penicillium funiculosum	Phosphorylation	Enzyme	Inhibitor	PI3K	Potent and specific phosphatidylinositol 3-kinase (P13-K) inhibitor	182.801	1.02198		253.557	0.946813		3	0.926452	1.02718	0.994937
LOPAC Plate_14	G	4	I5784	Ibandronate sodium	Lipid Signaling	Enzyme	Inhibitor	Farnesyl diphosphate synthase	Farnesyl diphosphate synthase inhibitor; inhibits bone resorption.	183.889	0.87619		275.834	0.816569		3	0.931953	0.879611	0.996111
LOPAC Plate_05	B	4	Y0503	Y-27632 dihydrochloride	Phosphorylation	Enzyme	Inhibitor	ROCK	Highly potent, cell-permeable, and selective Rho-associated coiled-coil forming protein serine/threonine kinase (ROCK) inhibitor. Also inhibits ROCK-II with equal potency. The inhibition is competitiv e with respect to ATP.	100.408	0.847327		122.948	0.809934		2	0.955869	0.849903	0.99697
LOPAC Plate_06	C	4	D8296	3-deazaadenosine	Immune System		Inhibitor		Antiviral	243.499	0.818232		271.29	0.82		2	1.00216	0.820637	0.99707
LOPAC Plate_16	F	1	n/a (no compound empty)	n/a (no compound empty)						174.939	0.978023		320.39	1.19638		3	1.22326	0.979213	0.998785
LOPAC Plate_04	D	8	C7041	McN-A-343	Cholinergic		Agonist	M1	M1 muscarinic acetylcholine receptor agonist.	161.575	0.779182		274.695	0.787771		2	1.01102	0.779857	0.999134
LOPAC Plate_12	F	12	n/a (no compound empty)	n/a (no compound empty)						390.06	1.00642		374.139	0.922706		3	0.916817	1.00728	0.99915
LOPAC Plate_16	C	1	n/a (no compound empty)	n/a (no compound empty)						171.008	0.956046		214.25	0.800037		3	0.836819	0.9565	0.999525
LOPAC Plate_16	H	9	PZ0121	CP-135807	Serotonergics		Agonist	5-HT1D	CP-135807 is a selective 5-HT1D agonist	182.801	1.02198		308.592	1.15232		3	1.12754	1.02216	0.999823
LOPAC Plate_15	F	5	T1443	TCPOBOP	Transcription		Agonist	CAR	Constitutive androstane receptor (CAR) agonist; most potent known member of the phenobarbital-like class of CYP-inducing agents	159.215	0.880466		257.488	0.886635		3	1.00701	0.879541	1.00105
LOPAC Plate_02	C	5	A9561	5-(N,N-hexamethylene)amiloride	Ion Pump		Inhibitor	Na+/H+ Antiporter	Na+/ H+ antiport inhibitor	137.588	0.800656		152.249	0.603015		Batch 1	0.753151	0.799787	1.00109
LOPAC Plate_15	B	11	T6943	Tyrphostin AG 112	Phosphorylation	Enzyme	Inhibitor	Tyrosine kinase	Protein tyrosine kinase inhibitor	194.595	1.07612		281.074	0.967853		3	0.899393	1.07452	1.00149
LOPAC Plate_03	D	9	C0424	PK 11195	GABA		Antagonist	Benzodiazepine	Peripheral benzodiazepine receptor antagonist	99.6462	0.871891		170.371	0.644295		2	0.738963	0.870488	1.00161
LOPAC Plate_11	B	10	N7634	Nifedipine	Ca2+ Channel		Antagonist	L-type	L-type Ca2+ channel blocker; vasodilator	394.04	1.06309		425.881	0.944814		3	0.888745	1.06114	1.00184
LOPAC Plate_14	E	4	R103	Ritanserin	Serotonin		Antagonist	5-HT2/5-HT1C	Potent 5-HT2 serotonin receptor antagonist which passes the blood-brain barrier	191.884	0.914286		263.842	0.781066		3	0.854291	0.912084	1.00241
LOPAC Plate_04	B	7	G5794	GR 79236X	Adenosine		Agonist	A1	A1 adenosine receptor agonist.	180.076	0.868401		256.194	0.734714		2	0.846053	0.864772	1.0042
LOPAC Plate_12	C	4	O2378	Oxymetazoline hydrochloride	Adrenoceptor		Agonist	alpha2A	Partial alpha2A adrenoceptor agonist; agonist at serotonin 5-HT1A, 5-HT1B and 5-HT1D receptors and a mixed agonist-antagonist at 5-HT2C receptors	370.159	0.955075		405.98	1.00123		3	1.04833	0.949178	1.00621
LOPAC Plate_13	H	8	P154	Pinacidil	K+ Channel		Activator		K+ channel activator; antihypertensive	202.457	0.919672		320.385	0.89809		3	0.976532	0.913333	1.00694
LOPAC Plate_11	G	8	A6605	AMN082	Glutamate		Agonist	mGluR7	Selective allosteric mGluR7 receptor agonist.	346.277	0.934229		429.862	0.953644		3	1.02078	0.927628	1.00712
LOPAC Plate_09	B	2	SML0264	AEG 3482	Heat Shock Proteins			HSP90	AEG3284 is a compound that binds to HSP90, leading to heat shock factor 1 (HSF1) dependent expression of HSP70, an endogenous inhibitor of JNK activity	297.521	0.949938		309.674	0.736469		3	0.775281	0.943127	1.00722
LOPAC Plate_06	B	2	D6035	Disopyramide phosphate	K+ Channel		Modulator		K+ channel modulator; anti-arrhythmic; cardiac depressant	275.26	0.924958		326.872	0.988		2	1.06816	0.917777	1.00782
LOPAC Plate_06	H	12	n/a (no compound empty)	n/a (no compound empty)						358.632	1.20511		318.931	0.964		2	0.799924	1.1957	1.00787
LOPAC Plate_11	E	7	N3136	Naltrexone hydrochloride	Opioid		Antagonist		Opioid receptor antagonist with greater potency and longer duration of action than its N-allyl congener, naloxone	342.297	0.92349		354.238	0.785873		3	0.850981	0.916112	1.00805
LOPAC Plate_13	E	4	P8477	Picotamide	Thromboxane		Antagonist	TXA2	Eicosenoid receptor antagonist; a thromboxane A2 antagonist; antiplatelet agent	202.457	0.919672		332.178	0.931148		3	1.01248	0.912084	1.00832
LOPAC Plate_16	A	10	W104	WIN 62,577	Tachykinin		Antagonist	NK1	NK1 tachykinin receptor antagonist	190.663	1.06593		218.177	0.8147		3	0.764307	1.05643	1.00899
LOPAC Plate_03	F	1	n/a (no compound empty)	n/a (no compound empty)						131.591	1.1514		159.986	0.605022		2	0.525465	1.14099	1.00912
LOPAC Plate_06	C	11	E1779	ET-18-OCH3	Lipid	Enzyme	Inhibitor	PIPLC	Phosphoinositide-specific Phospholipase C (PI-PLC) inhibitor	259.38	0.871595		227.619	0.688		2	0.789357	0.863641	1.00921
LOPAC Plate_12	E	9	P4405	Podophyllotoxin	Cytoskeleton and ECM		Inhibitor		Antineoplastic glucoside; inhibitor of microtubule assembly	402	1.03723		350.258	0.86381		3	0.832802	1.02718	1.00979
LOPAC Plate_06	B	4	I6659	Imperatorin	Phosphorylation	Enzyme	Modulator	p38 / ERK	A modulator of p38, ERK pathway. Imperatorin increases BMP-2 expression (mRNA) and increases bone density/volume and mineralization in vivo.	255.41	0.858255		295.111	0.892		2	1.03932	0.849903	1.00983
LOPAC Plate_03	A	2	SML0492	Zanamivir	Antiviral	Enzyme	Inhibitor	Viral neuraminidase	Zanamivir is an influenza viral neuraminidase inhibitor.	131.591	1.1514		358.489	1.3557		2	1.17744	1.13942	1.01051
LOPAC Plate_03	B	11	C1754	Choline bromide	Cholinergic	Enzyme	Substrate	Choline acetyltransferase	Choline acetyltransferase substrate	103.196	0.902948		237.81	0.899329		2	0.995992	0.893464	1.01061
LOPAC Plate_14	C	3	R6152	Ranolazine dihydrochloride	Lipid	Enzyme	Inhibitor	pFOX	pFOX (partial fatty acid oxidation) inhibitor	203.877	0.971429		303.818	0.899409		3	0.925862	0.96115	1.01069
LOPAC Plate_03	E	6	PZ0185	PF-431396 hydrate	Kinase inhibitors	Enzyme	Inhibitor	PYK2 and FAK	PF-431396 is a potent inhibitor of PYK2 and FAK kinases	103.196	0.902948		202.316	0.765101		2	0.847337	0.893295	1.01081
LOPAC Plate_14	G	5	R134	Rilmenidine hemifumarate	Imidazoline		Agonist	I1	Selective I1 imidazoline receptor agonist.	195.882	0.933333		295.822	0.87574		3	0.938293	0.92311	1.01107
LOPAC Plate_13	D	7	P103	S(-)-3PPP hydrochloride	Dopamine		Agonist	D2	Dopamine autoreceptor agonist; postsynaptic dopamine receptor antagonist	206.388	0.93753		332.178	0.931148		3	0.993193	0.92715	1.0112
LOPAC Plate_05	E	5	C231	CGP 20712A methanesulfonate	Adrenoceptor		Antagonist	beta1	Selective beta1-adrenoceptor antagonist	97.3346	0.821389		122.948	0.809934		2	0.986054	0.811428	1.01228
LOPAC Plate_12	G	5	O9637	Oxaprozin	Prostaglandin	Enzyme	Inhibitor		Non-steroidal anti-inflammatory drug (NSAID)	362.198	0.934536		298.515	0.736202		3	0.787772	0.92311	1.01238
LOPAC Plate_13	C	3	P7561	Phentolamine mesylate	Adrenoceptor		Antagonist	alpha	ATP-sensitive K+ channel blocker; alpha adrenoceptor antagonist	214.25	0.973244		312.522	0.876051		3	0.900135	0.96115	1.01258
LOPAC Plate_16	C	2	T7540	Tyrphostin 47	Phosphorylation	Enzyme	Inhibitor	EGFR	EGFR tyrosine kinase inhibitor	171.008	0.956046		277.143	1.03489		3	1.08247	0.943888	1.01288
LOPAC Plate_08	G	7	SML0015	SR 142948A	Cell signaling		Antagonist	Neurotensin	SR 142948A is a non-peptide Neurotensin receptor antagonist	200.094	0.833322		324.624	0.830728		3	0.996888	0.82256	1.01308
LOPAC Plate_14	F	4	R104	Rauwolscine hydrochloride	Adrenoceptor		Antagonist	alpha2	alpha2 Adrenoceptor antagonist	195.882	0.933333		287.827	0.852072		3	0.912934	0.921165	1.01321
LOPAC Plate_09	D	1	n/a (no compound empty)	n/a (no compound empty)						329.904	1.05333		289.425	0.688314		3	0.653463	1.03928	1.01352
LOPAC Plate_16	D	3	T8516	Trifluoperazine dihydrochloride	Dopamine		Antagonist	D1/D2	Calmodulin antagonist; dopamine receptor antagonist; antipsychotic; sedative	194.594	1.08791		300.73	1.12296		3	1.03222	1.07315	1.01376
LOPAC Plate_11	B	1	n/a (no compound empty)	n/a (no compound empty)						334.337	0.902014		278.614	0.618102		3	0.685247	0.88975	1.01378
LOPAC Plate_16	C	10	W108	WAY-100635 maleate	Serotonin		Antagonist	5-HT1A	Highly selective 5-HT1A serotonin receptor antagonist	202.457	1.13187		308.592	1.15232		3	1.01807	1.11607	1.01415
LOPAC Plate_05	H	6	D1262	P1,P4-Di(adenosine-5')tetraphosphate triammonium	Biochemistry		Inhibitor		Dinucleoside polyphosphate that competitively inhibits ADP-induced platelet aggregation	124.998	1.05483		150.611	0.992169		2	0.940592	1.04009	1.01417
LOPAC Plate_04	D	11	C9510	Pyrocatechol	Cell Cycle		Inhibitor		Carcinogen; causes DNA strand breakage	194.877	0.939777		289.496	0.830217		2	0.883419	0.926185	1.01467
LOPAC Plate_04	C	4	C4418	L-Cysteinesulfinic Acid	Glutamate		Ligand		Putative excitatory amino acid neurotransmitter	172.676	0.832714		263.594	0.755937		2	0.907799	0.820637	1.01472
LOPAC Plate_02	A	11	B0753	2,3-Butanedione monoxime	K+ Channel		Blocker	ATP-sensitive	Blocks ATP-sensitive K+ channels	184.954	1.07629	Edge effect	233.448	0.924623		Batch 1	0.859082	1.05926	1.01608
LOPAC Plate_14	E	8	PZ0108	CP-335963	Kinases	Enzyme	Inhibitor	aurora 2, PDGF	CP-335963 is an aurora 2 kinase inhibitor, PDGF inhibitor, and anti-proliferative	211.872	1.00952		259.844	0.769231		3	0.761974	0.993333	1.0163
LOPAC Plate_04	H	11	C9758	L-Canavanine sulfate	Nitric Oxide	Enzyme	Inhibitor	iNOS	Selective inhibitor of inducible nitric oxide synthase (iNOS)	228.179	1.10037		463.405	1.32895		2	1.20773	1.08268	1.01634
LOPAC Plate_09	E	2	I3766	Isoliquiritigenin	Cyclic Nucleotides	Enzyme	Activator	Guanylyl cyclase	Soluble guanylyl cyclase activator and aldose reductase inhibitor	333.952	1.06626		342.057	0.813483		3	0.762933	1.04844	1.01699
LOPAC Plate_12	H	1	n/a (no compound empty)	n/a (no compound empty)						378.119	0.975615		246.772	0.608593		3	0.623805	0.958922	1.01741
LOPAC Plate_01	E	2	211672	(±)-Nipecotic acid	GABA		Inhibitor	Uptake	GABA uptake inhibitor	197.722	0.957111		190.261	1.00248		Batch 1	1.0474	0.940319	1.01786
LOPAC Plate_07	C	8	SML0639	Ro 11-1464	Lipid Signaling	Enzyme	Activator	apoA-1	Ro 11-1464 induces the hepatic expression of apoA-1 and leads to increased levels of apoA-1 in the plasma.	157.38	0.866579		163.019	0.686925		2	0.792686	0.85073	1.01863
LOPAC Plate_07	E	10	G2128	L-Glutamic acid hydrochloride	Glutamate		Agonist		Endogenous excitatory amino acid neurotransmitter	165.811	0.913003		209.389	0.88232		2	0.966393	0.896203	1.01875
LOPAC Plate_01	G	2	246557	Tryptamine hydrochloride	Serotonin		Ligand		Serotonin receptor ligand	197.722	0.957111		212.644	1.12042		Batch 1	1.17063	0.939034	1.01925
LOPAC Plate_15	H	11	T7313	1-[2-(Trifluoromethyl)phenyl]imidazole	Nitric Oxide	Enzyme	Inhibitor	NOS	Potent nitric oxide synthase (NOS) inhibitor	214.25	1.18481		355.765	1.22504		3	1.03395	1.16212	1.01953
LOPAC Plate_03	H	5	SML0530	Clonixin	Inflammation	Enzyme	Inhibitor		non-steroidal anti inflammatory drug (NSAID)	117.393	1.02717		241.359	0.912752		2	0.888604	1.00746	1.01957
LOPAC Plate_09	A	2	I2764	ML-7	Phosphorylation	Enzyme	Inhibitor	MLCK	Selective myosin light chain kinase (MLCK) inhibitor	362.287	1.15673		257.051	0.611321		3	0.528492	1.13449	1.0196
LOPAC Plate_12	E	7	L9793	LP44	Serotonin		Agonist	5-HT7	A high affinity 5-HT7 receptor agonist.	362.198	0.934536		306.475	0.755834		3	0.808779	0.916112	1.02011
LOPAC Plate_14	F	7	S2201	Semicarbazide hydrochloride	Neurotransmission	Enzyme	Inhibitor	MAO	Monoamine oxidase (MAO) inhibitor	195.882	0.933333		287.827	0.852072		3	0.912934	0.914334	1.02078
LOPAC Plate_09	F	5	I120	Iofetamine hydrochloride	Neurotransmission		Analog		Reference standard; radio-iodinated iofetamine is used to image brain blood flow	281.329	0.898241		439.206	1.04453		3	1.16286	0.879541	1.02126
LOPAC Plate_11	F	7	N3398	S-Nitroso-N-acetylpenicillamine	Nitric Oxide		Donor		Nitric oxide donor; activates soluble guanylyl cyclase	346.277	0.934229		390.06	0.865343		3	0.926265	0.914334	1.02176
LOPAC Plate_16	H	8	V8261	(±)-gamma-Vinyl GABA	GABA	Enzyme	Inhibitor	Transaminase	Selective GABA transaminase (GABA-T) inhibitor; anticonvulsant	167.077	0.934068		312.523	1.167		3	1.24938	0.913333	1.0227
LOPAC Plate_05	H	3	C130	(±)-Chloro-APB hydrobromide	Dopamine		Agonist	D1	D1 dopamine receptor agonist.	140.366	1.18453		175.201	1.15416		2	0.974361	1.1579	1.02299
LOPAC Plate_15	H	6	T2408	Tolazamide	Hormone		Releaser	Insulin	Oral hypoglycemic agent; stimulates pancreatic islet cells to secrete insulin	186.732	1.03264		312.523	1.07614		3	1.04213	1.00748	1.02497
LOPAC Plate_10	D	2	P0618	cis(+/-)-8-OH-PBZI hydrobromide	Dopamine		Agonist	D3	D3 dopamine receptor agonist	317.76	1.06624		427.053	0.933632		3	0.875632	1.04016	1.02507
LOPAC Plate_15	H	3	S153	SQ 22536	Cyclic Nucleotides	Enzyme	Inhibitor	Adenylyl cyclase	Adenylyl cyclase inhibitor	171.008	0.945683		281.074	0.967853		3	1.02344	0.921625	1.0261
LOPAC Plate_10	F	9	M5644	(±)-Methoxyverapamil hydrochloride	Ca2+ Channel		Antagonist	L-type	L-type Ca2+ channel antagonist	301.569	1.01191		439.196	0.960181		3	0.948882	0.985829	1.02645
LOPAC Plate_02	G	5	L6668	Lercanidipine hydrochloride hemihydrate	Calcium Channel		Antagonist	Cav1.2b	L-type (Cav1.2b) vascular calcium channel antagonist	191.72	1.11567		196.231	0.777219		Batch 1	0.69664	1.08632	1.02702
LOPAC Plate_11	E	5	Z4626	ZM 39923 hydrochloride	Phosphorylation	Enzyme	Inhibitor	JNK-3	Janus kinase 3 (JNK-3) inhibitor.	354.238	0.955705		338.317	0.750553		3	0.78534	0.930035	1.0276
LOPAC Plate_07	C	4	E8875	beta-Estradiol	Hormone			Estrogen	Major estrogen sectreted by premenopausal ovary	153.164	0.843368		158.803	0.669162		2	0.79344	0.820637	1.0277
LOPAC Plate_13	H	7	E9658	Enalaprilat dihydrate	Neurotransmitters	Enzyme	Inhibitor		Enalaprilat is an inhibitor of angiotensin converting enzyme (ACE), antihypertensive, and a Bradykinin B1 receptor activator. Enalaprilat has nM potency versus ACE and also activates B1 receptors to release NO.	210.319	0.955387		336.109	0.942168		3	0.986164	0.929534	1.02781
LOPAC Plate_03	B	6	G6548	G15	Bioactive Small Molecules		Antagonist	GPR30	Selective GPR30 antagonist with little to no binding/activity towards classical estrogen receptors ER?/ER?	106.745	0.934004		202.316	0.765101		2	0.819162	0.907424	1.02929
LOPAC Plate_15	F	3	B6436	L-Beta-threo-benzyl-aspartate	Neurotransmission		Antagonist	EAAT3	Preferential EAAT3 excitatory amino acid transporter inhibitor.	182.801	1.0109		257.488	0.886635		3	0.877074	0.981998	1.02943
LOPAC Plate_03	C	2	B2292	O6-benzylguanine	DNA Repair	Enzyme	Inhibitor	O6-alkylguanine-DNA alkyltransferase	Irreversible inhibitor of the mammalian DNA repair protein, O6-alkylguanine-DNA alkyltransferase	106.745	0.934004		259.106	0.979866		2	1.0491	0.906539	1.0303
LOPAC Plate_03	G	1	n/a (no compound empty)	n/a (no compound empty)						142.239	1.24457		174.184	0.658713		2	0.529269	1.20739	1.03079
LOPAC Plate_12	E	12	n/a (no compound empty)	n/a (no compound empty)						409.961	1.05777		405.98	1.00123		3	0.94655	1.02608	1.03089
LOPAC Plate_14	A	3	PZ0102	CP-93129 dihydrochloride hydrate	Serotonergics		Agonist	5-HT1B	CP-93129 is a potent and selective 5-HT1B agonist.	231.86	1.10476		335.798	0.994083		3	0.899817	1.07132	1.03122
LOPAC Plate_07	B	6	F2802	Fluvoxamine maleate	Serotonin		Inhibitor	Reuptake	Selective serotonin reuptake inhibitor	170.026	0.936215		146.157	0.615872		2	0.657832	0.907424	1.03173
LOPAC Plate_14	C	6	S0441	SB-366791	Vanilloid		Antagonist	VR1	Vanilloid receptor-1 (VR1) antagonist	211.872	1.00952		255.846	0.757397		3	0.750252	0.977727	1.03252
LOPAC Plate_15	C	11	T7040	Tyrphostin 1	Phosphorylation	Enzyme	Inhibitor	EGFR	EGFR tyrosine kinase inhibitor	198.526	1.09786		579.838	1.99662		3	1.81865	1.06285	1.03294
LOPAC Plate_13	E	1	n/a (no compound empty)	n/a (no compound empty)						249.63	1.13396		198.526	0.556499		3	0.490758	1.09737	1.03335
LOPAC Plate_13	A	9	P162	Pregnenolone sulfate sodium	GABA		Antagonist	GABA-A	Neurosteroid that antagonizes the GABA-A receptor chloride channels	261.423	1.18753		324.316	0.909109		3	0.765545	1.14831	1.03415
LOPAC Plate_13	E	9	PZ0210	PF-04885614	Ion Channels		Inhibitor	Nav1.8	PF-04885614 is a potent and selective Nav1.8 inhibitor.	233.905	1.06253		328.247	0.920129		3	0.865979	1.02718	1.03442
LOPAC Plate_04	C	6	C5793	Ceftriaxone sodium	Antibiotic			Cell wall synthesis	Third generation cephalosporin antibiotic; interferes with cell wall synthesis	157.875	0.761338		256.194	0.734714		2	0.965029	0.735625	1.03495
LOPAC Plate_11	G	6	N1392	Nialamide	Neurotransmission	Enzyme	Inhibitor	MAO	Monoamine oxidase inhibitor	378.119	1.02013		358.218	0.794703		3	0.779018	0.985245	1.03541
LOPAC Plate_16	C	5	T144	(±)-Thalidomide	Cytoskeleton and ECM		Inhibitor	TNFalpha	Selective inhibitor of the biosynthesis of tumor necrosis factor a (TNF-alpha); angiogenesis inhibitor	159.215	0.890113		261.419	0.976172		3	1.09668	0.859368	1.03578
LOPAC Plate_07	D	11	G6649	Genistein	Phosphorylation	Enzyme	Inhibitor	Tyrosine kinase	Cytotoxic inhibitor of tyrosine kinase and topoisomerase II kinase	174.241	0.959427		259.976	1.09548		2	1.1418	0.926185	1.03589
LOPAC Plate_12	B	5	T5575	TG003	Cell Cycle	Enzyme	Inhibitor	Clk	Potent, specific, and reversible Cdc2-like kinase (Clk) inhibitor. Competes with ATP.	390.06	1.00642		342.297	0.844178		3	0.83879	0.970281	1.03725
LOPAC Plate_15	E	1	n/a (no compound empty)	n/a (no compound empty)						206.388	1.14134		194.594	0.670068		3	0.587091	1.09737	1.04007
LOPAC Plate_08	E	10	I0375	Imidazole-4-acetic acid hydrochloride	GABA		Antagonist	GABA-C	Competitive antagonist at GABA-C receptors	253.457	1.05556		382.433	0.978666		3	0.927154	1.01469	1.04028
LOPAC Plate_03	F	5	B8385	Bestatin hydrochloride	Biochemistry	Enzyme	Inhibitor	Aminopeptidase	Aminopeptidase inhibitor	99.6462	0.871891		237.81	0.899329		2	1.03147	0.838028	1.04041
LOPAC Plate_05	G	2	C101	8-Cyclopentyl-1,3-dipropylxanthine	Adenosine		Antagonist	A1	Selective A1 adenosine receptor antagonist	115.777	0.977019		138.316	0.911176		2	0.932608	0.939034	1.04045
LOPAC Plate_08	B	1	n/a (no compound empty)	n/a (no compound empty)						222.329	0.925921		324.607	0.830686		3	0.897146	0.88975	1.04065
LOPAC Plate_07	D	4	E9750	Estrone	Hormone			Estrogen	Luteolytic estrogen produced by the corpus luteum	157.38	0.866579		167.235	0.704688		2	0.813184	0.832725	1.04066
LOPAC Plate_15	F	10	T6376	Triamcinolone	Hormone		Agonist	Glucocorticoid	Synthetic glucocorticoid agonist; inducer of gene expression and apoptosis	190.663	1.05438		269.281	0.927244		3	0.879422	1.01319	1.04066
LOPAC Plate_13	A	8	P118	Phaclofen	GABA		Antagonist	GABA-B	GABA-B receptor antagonist	241.768	1.09825		304.66	0.854012		3	0.777615	1.05534	1.04066
LOPAC Plate_09	D	5	I117	R(+)-IAA-94	Cl- Channel		Inhibitor		Potent Cl- channel inhibitor	313.712	1.00164		317.769	0.755723		3	0.754489	0.962119	1.04107
LOPAC Plate_12	A	5	O3752	Orphenadrine hydrochloride	Cholinergic		Antagonist	Muscarinic	Muscarinic acetylcholine receptor antagonist; H1 histamine receptor antagonist	421.901	1.08858		398.02	0.981602		3	0.901727	1.04545	1.04126
LOPAC Plate_10	D	4	M1559	Moxonidine hydrochloride	Adrenoceptor		Agonist	alpha2A	Selective alpha2A adrenoreceptor agonist; imidazoline binding site agonist; antihypertensive	305.616	1.02549		463.484	1.01328		3	0.988092	0.984444	1.04169
LOPAC Plate_14	G	3	B5435	BIA 2-093	Na+ Channels		Blocker		Blocker of voltage-gated sodium channels; significantly blocks excitatory amino acid (glutamate and aspartate) release.	203.877	0.971429		315.81	0.934912		3	0.962409	0.931656	1.04269
LOPAC Plate_14	D	2	R2751	Ruthenium red	Ion Pump		Inhibitor	Mitochondrial uniporter	Inhibits mitchondrial Ca2+ uniporter; capsaicin antagonist	227.863	1.08571		331.801	0.982249		3	0.904703	1.04016	1.0438
LOPAC Plate_13	G	3	P8013	Pargyline hydrochloride	Neurotransmission	Enzyme	Inhibitor	MAO-B	MAO inhibitor, relatively selective for MAO-B	214.25	0.973244		363.627	1.0193		3	1.04733	0.931656	1.04464
LOPAC Plate_11	E	2	M9020	Mecamylamine hydrochloride	Cholinergic		Antagonist	Nicotinic	Nicotinic acetylcholine receptor antagonist	405.98	1.0953		370.159	0.821193		3	0.749741	1.04844	1.04469
LOPAC Plate_12	G	2	N158	Naftopidil dihydrochloride	Adrenoceptor		Antagonist	alpha1	alpha1 Adrenoceptor antagonist; antihypertensive	382.099	0.985884		262.693	0.647857		3	0.657133	0.94356	1.04486
LOPAC Plate_12	B	2	N149	Nimodipine	Ca2+ Channel		Antagonist	L-type	Potent L-type Ca2+ channel antagonist	382.099	0.985884		398.02	0.981602		3	0.995656	0.943127	1.04534
LOPAC Plate_07	F	8	F8791	5-fluoro-5'-deoxyuridine	DNA Metabolism		Inhibitor		DNA synthesis inhibitor; antiproliferative	161.595	0.889791		188.312	0.793504		2	0.891787	0.851165	1.04538
LOPAC Plate_10	A	5	SML0667	PF-429242 dihydrochloride	Gene Regulation	Enzyme	Inhibitor	S1P	PF-429242 is a potent inhibitor of S1P (cellular proprotein convertase sterol regulatory element-binding protein (SREBP) site 1 protease).	325.856	1.0934		447.292	0.97788		3	0.894346	1.04545	1.04587
LOPAC Plate_03	H	2	B2640	DL-Buthionine-[S,R]-sulfoximine	Multi-Drug Resistance	Enzyme	Inhibitor		Glutathione synthesis inhibitor	138.69	1.21352		330.094	1.24832		2	1.02868	1.15899	1.04704
LOPAC Plate_12	H	3	O0877	Oxolinic acid	Antibiotic	Enzyme	Inhibitor	DNA Gyrase	Quinolone antibacterial; DNA gyrase inhibitor	374.139	0.965345		330.357	0.81473		3	0.843978	0.921625	1.04744
LOPAC Plate_08	H	6	PZ0013	Nelfinavir mesylate hydrate	Immune Signaling	Enyzme	Inhibitor	HIV protease	Nelfinavir is a HIV protease inhibitor; antiretroviral; and anti-tumor agent	253.457	1.05556		413.562	1.05833		3	1.00262	1.00748	1.04772
LOPAC Plate_03	H	3	B5275	(+)-Brompheniramine maleate	Histamine		Antagonist	H1	H1 Histamine receptor antagonist	138.69	1.21352		315.897	1.19463		2	0.984438	1.1579	1.04803
LOPAC Plate_14	F	8	S3065	SC 19220	Prostaglandin		Antagonist	EP1	EP1 Prostanoid receptor antagonist	191.884	0.914286		287.827	0.852072		3	0.931953	0.871692	1.04886
LOPAC Plate_14	B	1	n/a (no compound empty)	n/a (no compound empty)						195.882	0.933333		219.868	0.650887		3	0.697379	0.88975	1.04898
LOPAC Plate_10	A	7	M3668	Metergoline	Serotonin		Antagonist	5-HT2/5-HT1D	5-HT1/5-HT2 Serotonin receptor antagonist; analgesic; antipyretic	362.287	1.21565		524.202	1.14602		3	0.942727	1.15832	1.04949
LOPAC Plate_16	B	1	n/a (no compound empty)	n/a (no compound empty)						167.077	0.934068		249.63	0.93215		3	0.997947	0.88975	1.04981
LOPAC Plate_03	A	8	SML0520	Arvanil	Neurotransmission		Activator		Arvanil is an activator of cannabinoid and vanilloid receptors.	131.591	1.1514		259.106	0.979866		2	0.85102	1.09661	1.04996
LOPAC Plate_13	G	1	n/a (no compound empty)	n/a (no compound empty)						229.974	1.04467		198.526	0.556499		3	0.532702	0.994314	1.05065
LOPAC Plate_11	D	9	N5636	3-Nitropropionic acid	Cell Stress		Toxin		Mitochondrial inhibitor; excitotoxin shown to cause brain lesions similar to those of Huntington's disease	398.02	1.07383		394.04	0.874173		3	0.814074	1.02193	1.05079
LOPAC Plate_14	B	3	R5648	Rottlerin	Phosphorylation	Enzyme	Inhibitor	PKC / CaM Kinase III	PKC and CaM kinase III inhibitor	211.872	1.00952		223.866	0.662722		3	0.65647	0.960408	1.05114
LOPAC Plate_08	D	1	n/a (no compound empty)	n/a (no compound empty)						262.351	1.0926		337.948	0.864826		3	0.791531	1.03928	1.05131
LOPAC Plate_13	H	1	n/a (no compound empty)	n/a (no compound empty)						222.112	1.00896		214.25	0.600577		3	0.595245	0.958922	1.05218
LOPAC Plate_02	E	9	O5889	Opipramol dihydrochloride	Sigma receptor		Agonist	1, 2	sigma1, sigma2 receptor agonist; an antagonist at D2, 5HT2, and H1 receptors; atypical antidepressant, antipsychotic, and axiolytic.	164.654	0.958162		172.548	0.683417		Batch 1	0.713258	0.910595	1.05224
LOPAC Plate_10	A	6	M2901	Molsidomine	Nitric Oxide		Donor		Vasodilator; converted by the liver to the active metabolite, SIN-1	346.095	1.16132		435.148	0.951331		3	0.819184	1.10308	1.05279
LOPAC Plate_11	F	11	N115	Naltrindole hydrochloride	Opioid		Antagonist	delta	Highly selective, non-peptide delta opioid receptor antagonist that is active when administered peripherally	398.02	1.07383		413.941	0.918324		3	0.855189	1.01944	1.05334
LOPAC Plate_11	G	11	S6319	Sertraline hydrochloride	Serotonin		Inhibitor	Reuptake	Selective serotonin reuptake inhibitor; antidepressant	386.079	1.04161		485.584	1.07726		3	1.03423	0.988289	1.05395
LOPAC Plate_12	D	9	P4394	Cisplatin	DNA		Intercalator		Induces intrastrand DNA crosslinks; effects are regulated by kinases, phosphatases and Ca2+/calmodulin	417.921	1.07831		342.297	0.844178		3	0.78287	1.02193	1.05518
LOPAC Plate_11	D	11	N9007	Noscapine hydrchloride	Opioid		Ligand		Antitussive; naturally occurring opium alkaloid	465.683	1.25638		378.119	0.838853		3	0.667677	1.19067	1.05519
LOPAC Plate_10	D	11	M7065	MK-912	Adrenoceptor		Agonist	alpha2A	Selective alpha2A adrenoreceptor agonist	374.431	1.25639		467.532	1.02213		3	0.813541	1.19067	1.0552
LOPAC Plate_16	G	7	U111	(-)-trans-(1S,2S)-U-50488 hydrochloride	Opioid		Agonist	kappa	Potent kappa opioid receptor agonist; more potent enantiomer of (±)-trans-U-50488	155.284	0.868136		237.832	0.888096		3	1.02299	0.82256	1.05541
LOPAC Plate_02	D	9	A202	N6-2-(4-Aminophenyl)ethyladenosine	Adenosine		Agonist	A3	Potent, non-selective A3 adenosine receptor agonist	157.887	0.918786		172.548	0.683417		Batch 1	0.743826	0.870488	1.05548
LOPAC Plate_14	D	11	S8251	Succinylcholine chloride	Cholinergic		Antagonist	Nicotinic	Nicotinic acetylcholine receptor antagonist.	263.841	1.25714		331.801	0.982249		3	0.781334	1.19067	1.05583
LOPAC Plate_14	B	9	O2139	N-Oleoyldopamine	Neurotransmission		Ligand	CB1	Endogenous vanilloid; weak CB1 cannabinoid receptor ligand.	207.875	0.990476		135.918	0.402367		3	0.406236	0.937956	1.05599
LOPAC Plate_10	A	1	n/a (no compound empty)	n/a (no compound empty)						342.048	1.14773		321.808	0.703544		3	0.612985	1.08475	1.05806
LOPAC Plate_14	C	10	S7395	Spiperone hydrochloride	Dopamine		Antagonist	D2	Selective D2 dopamine receptor antagonist.	247.851	1.18095		331.801	0.982249		3	0.831743	1.11607	1.05814
LOPAC Plate_11	H	8	N5023	Nordihydroguaiaretic acid from Larrea divaricata (creosote bush)	Leukotriene	Enzyme	Inhibitor	Lipoxygenase	Lipoxygenase inhibitor	358.218	0.966443		425.881	0.944814		3	0.977619	0.913333	1.05815
LOPAC Plate_14	B	4	R9525	RX 821002 hydrochloride	Adrenoceptor		Antagonist	alpha2	Selective alpha2-adrenoceptor antagonist	239.856	1.14286		311.813	0.923077		3	0.807693	1.07996	1.05824
LOPAC Plate_11	G	1	n/a (no compound empty)	n/a (no compound empty)						390.06	1.05235		362.198	0.803533		3	0.763561	0.994314	1.05837
LOPAC Plate_15	G	1	n/a (no compound empty)	n/a (no compound empty)						190.663	1.05438		167.077	0.575314		3	0.545642	0.994314	1.06041
LOPAC Plate_03	F	8	B5311	Biperiden hydrochloride	Cholinergic		Antagonist	muscarinic	Non-selective muscarinic acetylcholine receptor antagonist; antiparkinsonian	103.196	0.902948		244.909	0.926174		2	1.02572	0.851165	1.06084
LOPAC Plate_01	A	2	120693	DL-alpha-Methyl-p-tyrosine	Neurotransmission	Enzyme	Inhibitor	Tyrosine hydroxylase	Inhibitor of catecholamine synthesis and tyrosine hydroxylase	249.95	1.20993		272.334	1.43492		Batch 1	1.18595	1.13942	1.06188
LOPAC Plate_07	E	8	F8257	Flunarizine dihydrochloride	Ion Pump		Blocker	Na+/Ca2+ channel	Ca2+/Na+ channel blocker; vasodilator	148.949	0.820156		154.588	0.651399		2	0.794238	0.77167	1.06283
LOPAC Plate_10	B	6	SML0223	Zoledronic acid monohydrate	Kinase	Enzyme	Inhibitor	FPP synthase	Zoledronic acid (zoledronate) is a bisphosphonate bone resorption inhibitor, an inhibitor of farnesyl diphosphate (FPP) synthase	325.856	1.0934		431.101	0.942482		3	0.861971	1.02818	1.06343
LOPAC Plate_14	H	8	A8231	AGK2	Gene Regulation	Enzyme	Inhibitor	SIRT2	SIRT2 inhibitor. AGK2 rescues dopamine neurons from a-synuclein toxicity in Parkinson's disease models.	203.877	0.971429		291.825	0.863906		3	0.889315	0.913333	1.06361
LOPAC Plate_05	G	7	D1916	D-ribofuranosylbenzimidazole	Transcription		Inhibitor		Inhibitor of RNA synthesis; chain terminator	115.777	0.977019		129.095	0.850431		2	0.870434	0.917874	1.06444
LOPAC Plate_12	H	12	n/a (no compound empty)	n/a (no compound empty)						405.98	1.0475		370.159	0.91289		3	0.871492	0.983515	1.06506
LOPAC Plate_07	F	10	G2536	Ganciclovir	Cell Cycle		Inhibitor	G2-M checkpoint	Pro-drug nucleoside analog; upon thymidine kinase expression,converted to a phosphorylated active analog and incorporated into DNA, causing death of the malignant dividing cell	165.811	0.913003		213.605	0.900083		2	0.985849	0.85721	1.06509
LOPAC Plate_10	D	1	n/a (no compound empty)	n/a (no compound empty)						329.904	1.10699		329.904	0.721243		3	0.651538	1.03928	1.06515
LOPAC Plate_02	B	2	A7275	L-2-aminoadipic acid	Glutamate	Enzyme	Inhibitor	Glutamine synthetase	Glutamine synthetase inhibitor	168.037	0.977851	Possibly	192.848	0.763819		Batch 1	0.78112	0.917777	1.06546
LOPAC Plate_07	B	10	G0639	Glybenclamide	K+ Channel		Blocker	ATP-dependent	Antidiabetic agent which blocks pancreatic ATP-dependent K+ channels resulting in an increase in intracellular Ca2+ and consequent insulin secretion	191.103	1.05227		158.803	0.669162		2	0.63592	0.986993	1.06614
LOPAC Plate_10	E	11	M7277	(±)-3-(3,4-dihydroxyphenyl)-2-methyl-DL-alanine	Neurotransmission	Enzyme	Inhibitor	L-aromatic amino acid decarboxylase	L-aromatic amino acid decarboxylase inhibitor; antihypertensive	321.808	1.07982		479.675	1.04868		3	0.971159	1.01263	1.06636
LOPAC Plate_13	A	5	P8782	(±)-cis-Piperidine-2,3-dicarboxylic acid	Glutamate		Agonist	NMDA	Excitatory amino acid; NMDA glutamate receptor agonist	245.699	1.1161		324.316	0.909109		3	0.814539	1.04545	1.06758
LOPAC Plate_14	D	7	S1875	(-)-Scopolamine hydrobromide	Cholinergic		Antagonist	Muscarinic	Cholinergic receptor antagonist; isolated from members of the Solanaceae family	207.875	0.990476		311.813	0.923077		3	0.931953	0.92715	1.0683
LOPAC Plate_02	E	3	A8423	Amiodarone hydrochloride	Adrenoceptor		Agonist	alpha/beta	alpha and beta adrenoceptor agonist; inhibits binding of 1,4-dihydropyridine to L-type Ca2+ channels; coronary vasodilator	181.57	1.0566		186.082	0.737018		Batch 1	0.697535	0.988412	1.06899
LOPAC Plate_13	B	3	P7505	Putrescine dihydrochloride	Glutamate		Agonist	NMDA-Polyamine	Binds to the polyamine modulatory site of the NMDA glutamate receptor and potentiates NMDA-induced currents; precursor of spermidine	226.043	1.02682		304.66	0.854012		3	0.831709	0.960408	1.06915
LOPAC Plate_02	F	2	C1240	Chlormethiazole hydrochloride	GABA		Agonist	GABA(A)	GABA(A) agonist; glycine receptor modulator	188.337	1.09598		179.315	0.710218		Batch 1	0.648021	1.02507	1.06917
LOPAC Plate_11	B	11	N8659	Nimustine hydrochloride	DNA		Intercalator		Antineoplastic; bifunctional nitrosourea alkylating anticancer agent	425.881	1.14899		390.06	0.865343		3	0.753132	1.07452	1.06931
LOPAC Plate_13	C	5	P8828	Pergolide methanesulfonate	Dopamine		Agonist	D2/D1	Dopamine receptor agonist; antiparkinsonian	202.457	0.919672		288.936	0.809934		3	0.880676	0.859368	1.07017
LOPAC Plate_11	G	7	N3510	Niclosamide	Antibiotic			Protonophore	Protonophoric anthelmintic; uncouples oxidative phosphorylation	326.376	0.880537		250.753	0.556292		3	0.631765	0.82256	1.07048
LOPAC Plate_09	F	12	n/a (no compound empty)	n/a (no compound empty)						338	1.07918		443.254	1.05415		3	0.976807	1.00728	1.07138
LOPAC Plate_13	B	7	P101	2-Phenylaminoadenosine	Adenosine		Agonist	A2 > A1	Selective A2 adenosine receptor agonist; potent vasodilator; weak inhibitor of adenosine uptake by rat cerebral cortical synaptosomes	229.974	1.04467		312.522	0.876051		3	0.838588	0.974902	1.07157
LOPAC Plate_02	C	4	A8835	Aminoguanidine hydrochloride	Nitric Oxide	Enzyme	Inhibitor	NOS	Inhibits inducible and constitutive NOS	151.121	0.879409		165.782	0.656616		Batch 1	0.746656	0.820637	1.07162
LOPAC Plate_11	H	3	M107	(+)-MK-801 hydrogen maleate	Glutamate		Antagonist	NMDA	Highly potent and selective non-competitive NMDA glutamate receptor antagonist	366.178	0.98792		405.98	0.900664		3	0.911677	0.921625	1.07193
LOPAC Plate_02	F	5	A9699	(±)-HA-966	Glutamate		Antagonist	NMDA-glycine	NMDA glutamate receptor antagonist which appears to act by competing with glycine at the glycine modulation site of the NMDA glutamate receptor	154.504	0.899098		172.548	0.683417		Batch 1	0.760114	0.838028	1.07287
LOPAC Plate_05	F	5	C237	(2S,1'S,2'S)-2-(carboxycyclopropyl)glycine	Glutamate		Agonist	mGluR2	Potent group II metabotropic glutamate receptor agonist	106.556	0.899204		119.874	0.789686		2	0.878205	0.838028	1.073
LOPAC Plate_16	E	8	SML0776	Galloflavin potassium	Cell Stress	Enzyme	Inhibitor	LDN-A/B	Galloflavin is an inhibitor of lactate dehydrogenase (LDH).	190.663	1.06593		292.868	1.09361		3	1.02596	0.993333	1.07309
LOPAC Plate_15	D	5	T0891	Tolbutamide	Hormone		Releaser	Insulin	Oral hypoglycemic agent; stimulates pancreatic islet cells to secrete insulin	186.732	1.03264		292.868	1.00846		3	0.976587	0.962119	1.0733
LOPAC Plate_06	A	11	E1279	Enoximone	Cyclic Nucleotides	Enzyme	Inhibitor	PDE III	Selective phosphodiesterase III (PDE III) inhibitor	338.782	1.13841		310.991	0.94		2	0.825713	1.05926	1.07472
LOPAC Plate_09	G	10	L8533	Lansoprazole	Ion Pump		Inhibitor	H+ pump	Gastric proton pump inhibitor	333.952	1.06626		321.817	0.765349		3	0.717791	0.991884	1.07498
LOPAC Plate_15	C	5	F4429	FAUC 213	Dopamine		Antagonist	D4	Highly selective D4 dopamine receptor full antagonist	167.077	0.923944		241.763	0.83249		3	0.901017	0.859368	1.07514
LOPAC Plate_13	F	8	I0658	IC 261	Phosphorylation	Enzyme	Inhibitor	CK-1delta/epsilon	Casein kinase-1 (CK-1delta/epsilon) inhibitor.	206.388	0.93753		304.66	0.854012		3	0.910917	0.871692	1.07553
LOPAC Plate_15	B	10	T6031	DL-Thiorphan	Neurotransmission	Enzyme	Inhibitor	Enkephalinase	Enkephalinase inhibitor	206.388	1.14134		226.039	0.778344		3	0.681959	1.06114	1.07558
LOPAC Plate_12	H	5	O100	Oxotremorine methiodide	Cholinergic		Agonist	Muscarinic	Nonselective muscarinic acetylcholine receptor agonist	409.961	1.05777		350.258	0.86381		3	0.816632	0.982953	1.07612
LOPAC Plate_09	E	10	A6664	4-Amidinophenylmethanesulfonyl fluoride hydrochloride	Biochemistry	Enzyme	Inhibitor	Serine protease	Irreversible inhibitor of serine proteases with lysine or arginine substrate specificities	342.048	1.09211		390.632	0.929004		3	0.850654	1.01469	1.0763
LOPAC Plate_05	E	7	D1542	1,4-Dideoxy-1,4-imino-D-arabinitol	Phosphorylation	Enzyme	Inhibitor	Glycogen phosphorylase	Allosteric glycogen phosphorylase inhibitor	97.3346	0.821389		107.579	0.708692		2	0.862797	0.763061	1.07644
LOPAC Plate_15	B	4	A2729	Amisulpride	Dopamine		Antagonist	D2/D3	selective D2/D3 dopamine receptor antagonist and atypical antipsychotic	210.319	1.16308		245.694	0.846026		3	0.727404	1.07996	1.07696
LOPAC Plate_11	C	1	n/a (no compound empty)	n/a (no compound empty)						382.099	1.03087		318.416	0.706403		3	0.685247	0.9565	1.07776
LOPAC Plate_02	A	6	A9834	(±)-AMT hydrochloride	Nitric Oxide	Enzyme	Inhibitor	iNOS	Potent, selective and reversible inducible nitric oxide synthase inhibitor	174.804	1.01723		236.831	0.938023	Edge effect	Batch 1	0.922138	0.943797	1.0778
LOPAC Plate_06	B	6	D002	6,7-ADTN hydrobromide	Dopamine		Agonist		Dopamine receptor agonist	291.141	0.978321		461.855	1.396		2	1.42693	0.907424	1.07813
LOPAC Plate_02	E	4	A9251	Adenosine	Adenosine		Agonist		Endogenous neurotransmitter and neuromodulator	137.588	0.800656		206.381	0.81742		Batch 1	1.02094	0.742456	1.07839
LOPAC Plate_16	D	6	SML0134	L2-b	Cell Biology		Chelator		L2-b is a bifunctional Aß-interacting, metal-chelating molecule that modulates ROS production in, and improves survival of neuroblastoma cells incubated in the presence of Aß along with Copper or Zinc	182.801	1.02198		257.488	0.961493		3	0.940815	0.946967	1.07921
LOPAC Plate_15	C	1	n/a (no compound empty)	n/a (no compound empty)						186.732	1.03264		202.457	0.697141		3	0.675105	0.9565	1.0796
LOPAC Plate_01	A	3	291552	6-Methoxy-1,2,3,4-tetrahydro-9H-pyrido[3,4b] indole	Neurotransmission	Enzyme	Inhibitor	MAO	MAO inhibitor	216.375	1.0474		227.567	1.19904	Possibly	Batch 1	1.14478	0.969573	1.08027
LOPAC Plate_14	B	11	PZ0116	PD-166285 hydrate	Kinase/Phosphatase	Enzyme	Inhibitor	Src, FGFR	PD-166285 hydrate is a broad spectrum protein tyrosine kinase inhibitor; Src and FGFR kinase inhibitor	243.853	1.16191		287.827	0.852072		3	0.73334	1.07452	1.08133
LOPAC Plate_08	E	9	H127	Hexahydro-sila-difenidol hydrochloride, p-fluoro analog	Cholinergic		Antagonist	M3>M1>M2	High affinity muscarinic acetylcholine receptor antagonist, but displays altered selectivity (M3 > M1 > M2)	266.798	1.11112		391.327	1.00143		3	0.901277	1.02718	1.08172
LOPAC Plate_02	E	2	A7655	(±)-Atenolol	Adrenoceptor		Antagonist	beta1	Selective beta1 adrenoceptor antagonist; antihypertensive; antianginal; antiarrhythmic	174.804	1.01723		175.932	0.696817		Batch 1	0.685016	0.940319	1.08179
LOPAC Plate_10	B	3	L134	Linopirdine	Cholinergic		Releaser		Stimulates release of acetylcholine and other neurotransmitters; cognitive enhancer	309.664	1.03907		447.292	0.97788		3	0.941109	0.960408	1.08191
LOPAC Plate_16	A	5	T122	Telenzepine dihydrochloride	Cholinergic		Antagonist	M1	Selective M1 muscarinic acetylcholine receptor antagonist and anti-ulcer agent	202.457	1.13187		265.35	0.990851		3	0.875414	1.04545	1.08266
LOPAC Plate_02	A	2	A7250	N-Acetyl-L-Cysteine	Glutamate		Antagonist		Amino acid analog that partially improves neuronal survival following transient forebrain ischemia	212.02	1.2338		230.064	0.911223	Edge effect	Batch 1	0.738551	1.13942	1.08283
LOPAC Plate_12	E	10	P5052	5alpha-Pregnan-3alpha-ol-11,20-dione	GABA		Modulator	GABA-A	Neurosteroid that acts as a positive allosteric modulator of the GABA-A receptor; anesthetic	425.881	1.09885		346.277	0.853994		3	0.77717	1.01469	1.08294
LOPAC Plate_10	H	1	n/a (no compound empty)	n/a (no compound empty)						309.664	1.03907		406.814	0.889386		3	0.855942	0.958922	1.08358
LOPAC Plate_13	B	8	B4311	BF-170 hydrochloride	Neurodegeneration		Binder	Tau	Exhibits 3-fold greater binding affinity to tau than amyloid beta fibrils. Does not inhibit amyloid beta.	229.974	1.04467		316.454	0.88707		3	0.849137	0.963558	1.08418
LOPAC Plate_13	A	4	PZ0112	PD-184161	Kinase	Enzyme	Inhibitor	MEK	PD-184161 is a MEK inhibitor.	253.561	1.15182		277.143	0.776875		3	0.674478	1.06219	1.08438
LOPAC Plate_03	G	7	B138	BTCP hydrochloride	Dopamine		Blocker	Reuptake	Selective blocker of dopamine reuptake	113.844	0.996118		220.063	0.832215		2	0.835458	0.917874	1.08524
LOPAC Plate_03	B	2	B2134	(+)-Bromocriptine methanesulfonate	Dopamine		Agonist	D2	D2 dopamine receptor agonist; inhibits prolaction secretion	113.844	0.996118		315.897	1.19463		2	1.19929	0.917777	1.08536
LOPAC Plate_02	G	3	A8598	Ancitabine hydrochloride	DNA Metabolism		Inhibitor		Antineoplastic	184.954	1.07629	Possibly	189.465	0.750419		Batch 1	0.697226	0.990874	1.08621
LOPAC Plate_03	F	6	SML0564	PD153035 hydrochloride	Phosphorylation		Inhibitor	EGFR	A potent and selective ATP competitive inhibitor of the epidermal growth factor receptor tyrosine kinase EGFR.	103.196	0.902948		195.217	0.738255		2	0.817606	0.830771	1.08688
LOPAC Plate_02	F	3	A8456	4-(2-Aminoethyl)benzenesulfonyl fluoride hydrochloride	Biochemistry	Enzyme	Inhibitor	Serine Protease	Irreversible serine protease inhibitor	181.57	1.0566		179.315	0.710218	Possibly	Batch 1	0.67217	0.971114	1.08803
LOPAC Plate_02	E	8	A164	Alaproclate hydrochloride	Serotonin		Inhibitor	Reuptake	Potent and selective serotonin reuptake inhibitor	144.354	0.840033		145.482	0.576214		Batch 1	0.685943	0.77167	1.08859
LOPAC Plate_02	F	9	A230	gamma-Acetylinic GABA	GABA	Enzyme	Inhibitor	GABA transaminase	GABA transaminase (GABA-T) inhibitor	164.654	0.958162		179.315	0.710218		Batch 1	0.741229	0.879879	1.08897
LOPAC Plate_14	F	1	n/a (no compound empty)	n/a (no compound empty)						223.865	1.06667		323.805	0.958579		3	0.898668	0.979213	1.08931
LOPAC Plate_14	C	2	R2625	Retinoic acid	Apoptosis	Enzyme	Activator		Induces caspase-dependent apoptosis	215.87	1.02857		303.818	0.899409		3	0.874425	0.943888	1.08972
LOPAC Plate_16	E	6	S5317	SKF 95282 dimaleate	Histamine		Antagonist	H2	H2 Histamine receptor antagonist.	210.319	1.17582		245.694	0.917455		3	0.780268	1.07884	1.0899
LOPAC Plate_09	D	11	L9664	Loratadine	Histamine		Antagonist	H1	H1 Histamine receptor antagonist	406.814	1.2989		354.2	0.842364		3	0.648523	1.19067	1.0909
LOPAC Plate_08	D	4	H1753	Hydralazine hydrochloride	Neurotransmission	Enzyme	Inhibitor	MAO-A/B	Non-selective MAO-A/B inhibitor; antihypertensive	257.904	1.07408		391.327	1.00143		3	0.932358	0.984444	1.09105
LOPAC Plate_16	G	9	A7111	Acepromazine maleate	neurotransmission		Antagonist		Acepromazine is a phenothiazine antipsychotic comonly used as a veterinary drug (horses, dogs and cats).	174.939	0.978023		261.419	0.976172		3	0.998107	0.89631	1.09117
LOPAC Plate_10	B	1	n/a (no compound empty)	n/a (no compound empty)						289.425	0.971159		418.958	0.915935		3	0.943135	0.88975	1.0915
LOPAC Plate_13	H	9	A1237	Pramipexole dihydrochloride	Dopaminergics		Agonist	D3/D2	Pramipexole is a dopamine agonist active at D3 and D2 receptor subtypes	245.699	1.1161		395.076	1.10746		3	0.992257	1.02216	1.09191
LOPAC Plate_08	H	5	H5257	Hispidin	Phosphorylation	Enzyme	Inhibitor	PKC-beta	Potent protein kinase C-beta inhibitor	257.904	1.07408		337.964	0.864868		3	0.805218	0.982953	1.09271
LOPAC Plate_13	A	6	P9233	Piribedil maleate	Dopamine		Agonist	D3	Non-selective dopamine receptor agonist	265.354	1.20539		312.522	0.876051		3	0.726779	1.10308	1.09275
LOPAC Plate_16	B	7	U104	UK 14,304	Adrenoceptor		Agonist	alpha2	alpha2 Adrenoceptor agonist	190.663	1.06593		261.419	0.976172		3	0.915791	0.974902	1.09337
LOPAC Plate_02	E	6	H3288	HEMADO	Adenosine		Agonist	A3	A3 adenosine receptor agonist	168.037	0.977851		155.632	0.616415		Batch 1	0.630378	0.893295	1.09466
LOPAC Plate_01	G	12	n/a (no compound empty)	n/a (no compound empty)						242.489	1.17381	Edge effect	205.183	1.08111		Batch 1	0.921019	1.07229	1.09468
LOPAC Plate_13	G	7	B9061	Bicalutamide (CDX)	Gene Regulation		Antagonist	AR	A non-steroidal Androgen Receptor (AR) antagonist and a pure antiandrogen.	198.526	0.901815		288.936	0.809934		3	0.898115	0.82256	1.09635
LOPAC Plate_16	G	3	T9033	Thapsigargin	Intracellular Calcium	Enzyme	Releaser		Potent, cell-permeable, IP3-independent intracellular calcium releaser	182.801	1.02198		273.212	1.02021		3	0.99827	0.931656	1.09695
LOPAC Plate_11	H	7	N3529	NAN-190 hydrobromide	Serotonin		Antagonist	5-HT1A	Potent 5-HT1A serotonin receptor antagonist that lacks TFMPP-like stimulus properties	378.119	1.02013		453.743	1.00662		3	0.986756	0.929534	1.09747
LOPAC Plate_16	A	3	T7947	Tomoxetine	Adrenoceptor		Inhibitor	Reuptake	Norepinephrine reuptake blocker	210.319	1.17582		288.936	1.07893		3	0.917595	1.07132	1.09755
LOPAC Plate_03	C	8	B168	(±)-Butaclamol hydrochloride	Dopamine		Antagonist	D2>D1	Dopamine receptor antagonist; selective for D2 over D1	106.745	0.934004		220.063	0.832215		2	0.891018	0.85073	1.09789
LOPAC Plate_15	H	10	PZ0140	EBPC	Lipids	Enzyme	Inhibitor	aldose reductase	EBPC is an aldose reductase inhibitor; anti-cancer.	202.457	1.1196		320.385	1.10322		3	0.98537	1.01868	1.09907
LOPAC Plate_12	C	5	O8757	Ofloxacin	Antibiotic			DNA Synthesis	Fluorinated quinolone antibacterial; interferes with DNA synthesis	366.178	0.944806		394.04	0.971786		3	1.02856	0.859368	1.09942
LOPAC Plate_13	B	4	P8293	Protoporphyrin IX disodium	Cyclic Nucleotides	Enzyme	Activator	Guanylyl cyclase	Activates soluble guanylyl cyclase	261.423	1.18753		308.591	0.865031		3	0.728428	1.07996	1.09961
LOPAC Plate_08	C	9	B8312	BNTX maleate salt hydrate	Opiods		Antagonist	d1	BNTX is a selective d1 non peptide opioid receptor antagonist. BNTX is used as a tool for the study of various function of opioid receptors including alcohol and drug dependence	275.691	1.14816		391.327	1.00143		3	0.872202	1.04357	1.10022
LOPAC Plate_14	D	3	R6520	Rolipram	Cyclic Nucleotides	Enzyme	Inhibitor	PDE IV	Selective cAMP-dependent phosphodiesterase (Type IV) cAMP-dependent inhibitor	247.851	1.18095		427.743	1.26627		3	1.07225	1.07315	1.10046
LOPAC Plate_09	H	2	I5627	(±)-Isoproterenol hydrochloride	Adrenoceptor		Agonist	beta	Sympathomimetic amine acting almost exclusively on beta adrenoceptors; bronchodilator	358.239	1.1438		487.781	1.16005		3	1.0142	1.03784	1.1021
LOPAC Plate_02	D	4	A9013	BW 284c51	Cholinergic	Enzyme	Inhibitor	Acetylcholinesterase	Selective acetylcholinesterase inhibitor	157.887	0.918786		182.698	0.723618		Batch 1	0.787581	0.832725	1.10335
LOPAC Plate_15	D	3	S106	SR-95531	GABA		Antagonist	GABA-A	Specific GABA-A receptor antagonist; does not affect GABA-transaminase or glutamate-decarboxylase activities.	214.25	1.18481		320.385	1.10322		3	0.931131	1.07315	1.10406
LOPAC Plate_09	E	5	I119	Indatraline hydrochloride	Dopamine		Inhibitor	Reuptake	Potent inhibitor of dopamine, norepinephrine and serotonin reuptake	321.808	1.02748		362.296	0.861617		3	0.83857	0.930035	1.10478
LOPAC Plate_11	D	5	X3629	X80	Apoptosis	Enzyme	Inhibitor	XPA protein	X80 is an inhibitor of xeroderma pigmentosum group A protein (XPA protein) required for the removal of all types of DNA lesions repaired by nucleotide excision repair Including both transcription coupled and global genomic nucleotide excision repair	394.04	1.06309		358.218	0.794703		3	0.747542	0.962119	1.10494
LOPAC Plate_02	H	9	A242	Alloxazine	Adenosine		Antagonist	A2b	Selective A2b adenosine receptor antagonist	228.937	1.33224		236.831	0.938023		Batch 1	0.704095	1.2054	1.10522
LOPAC Plate_05	E	4	C147	(+)-Cyclazocine	Opioid		Antagonist		Sigma opioid receptor antagonist	97.3346	0.821389		110.653	0.728941		2	0.887449	0.742456	1.10631
LOPAC Plate_09	A	5	I9890	m-Iodobenzylguanidine hemisulfate	Apoptosis		Activator		Antitumor agent which inhibits ADP ribosylation; induces changes in the mitochondrial membrane potential, activation of caspase-3 and DNA fragmentation	362.287	1.15673		204.428	0.486173		3	0.420301	1.04545	1.10644
LOPAC Plate_14	B	8	S2812	SNC80	Opioid		Agonist	delta	delta Opioid receptor agonist	223.865	1.06667		291.825	0.863906		3	0.809912	0.963558	1.10701
LOPAC Plate_14	F	2	R3277	Rutaecarpine	K+ Channel		Blocker		Delayed rectifier K+ channel blocker; inhibits platelet aggregation; vasoldilator	239.856	1.14286		287.827	0.852072		3	0.745562	1.03158	1.10787
LOPAC Plate_02	G	4	SML0517	Amlexanox					Anti-allergy and anti-asthma drug that blocks histamine and leukotriene release from leukocytes and mast cells.	168.037	0.977851	Possibly	206.381	0.81742		Batch 1	0.835936	0.881523	1.10927
LOPAC Plate_15	E	2	S9186	SIB 1757	Glutamate		Antagonist	mGluR5	Highly selective mGlu5 metabotropic glutamate receptor antagonist	210.319	1.16308		277.143	0.954317		3	0.820512	1.04844	1.10933
LOPAC Plate_15	H	4	T0318	Tranilast	Leukotriene	Enzyme	Inhibitor	LTC4	Inhibits LTC4 and PGE2 formation but does not inhibit cyclooxygenase or lipoxygenase activity; anti-asthma drug	174.939	0.967422		328.248	1.13029		3	1.16835	0.872072	1.10934
LOPAC Plate_16	D	10	A9480	AC-55649	Gene Regulation		Agonist	RARbeta2	Subtype selective retinoic acid receptor beta2 (RARbeta2) agonist.	210.319	1.17582		245.694	0.917455		3	0.780268	1.05913	1.11017
LOPAC Plate_15	E	5	T1132	Tetraethylthiuram disulfide	Biochemistry	Enzyme	Inhibitor	Alcohol Dehydrogenase	Alcohol dehydrogenase inhibitor	186.732	1.03264		277.143	0.954317		3	0.924153	0.930035	1.11032
LOPAC Plate_06	B	8	D108	1,3-Dipropyl-7-methylxanthine	Adenosine		Antagonist	A2	Caffeine analog with some selectivity for A2 adenosine receptors	279.23	0.938299		295.111	0.892		2	0.950656	0.844713	1.11079
LOPAC Plate_15	C	4	S168	(±)-SKF 38393, N-allyl-, hydrobromide	Dopamine		Agonist	D1	D1 dopamine receptor agonist.	190.663	1.05438		320.385	1.10322		3	1.04632	0.949178	1.11083
LOPAC Plate_16	H	1	n/a (no compound empty)	n/a (no compound empty)						190.663	1.06593		237.837	0.888113		3	0.833179	0.958922	1.11159
LOPAC Plate_12	F	6	T0826	TBB	Phosphorylation	Enzyme	Inhibitor	Casein kinase 2	Highly selective, ATP/GTP-competitive inhibitor of casein kinase 2 (CK2).	390.06	1.00642		334.337	0.824546		3	0.819283	0.905265	1.11174
LOPAC Plate_11	D	4	M116	Metolazone	Ion Pump		Inhibitor	Na+/Cl- transporter	Diuretic; antihypertensive	405.98	1.0953		346.277	0.768213		3	0.701371	0.984444	1.11261
LOPAC Plate_12	C	6	T2705	Topotecan hydrochloride hydrate	Apoptosis and Cell Cycle	Enzyme	Inhibitor	topoisomerase I	Topetecan is a topoisomerase I inhibitor and an apoptosis inducer. It is a potent antineoplastic agent	421.901	1.08858		421.901	1.0405		3	0.95583	0.977727	1.11338
LOPAC Plate_10	C	10	M6500	Cysteamine hydrochloride	Somatostatin		Depleter		Induces duodenal ulcers in rats, potent depletion of prolactin concentrations in pituitary tissue in vivo and in vitro and depletion of somatostatin concentrations.	370.383	1.24281		366.334	0.800888		3	0.644416	1.11607	1.11356
LOPAC Plate_07	H	7	F6800	Fenoldopam bromide	Dopamine		Agonist	D1	Peripheral D1 dopamine receptor agonist	224.827	1.23797		390.656	1.64614		2	1.32971	1.11053	1.11475
LOPAC Plate_05	E	11	D5794	Diacylglycerol Kinase Inhibitor II	Phosphorylation	Enzyme	Inhibitor	Diacylglycerol kinase	Diacylglycerol kinase inhibitor	112.703	0.951081		107.579	0.708692		2	0.745144	0.852984	1.11501
LOPAC Plate_11	D	10	N7778	7-Nitroindazole	Nitric Oxide	Enzyme	Inhibitor	nNOS	Selective inhibitor of brain nitric oxide synthase	437.822	1.18121		437.822	0.971304		3	0.822297	1.05913	1.11526
LOPAC Plate_11	F	3	M104	(±)-Muscarine chloride	Cholinergic		Agonist	Muscarinic	Muscarinic acetylcholine receptor agonist	405.98	1.0953		378.119	0.838853		3	0.765865	0.981998	1.11538
LOPAC Plate_12	G	1	n/a (no compound empty)	n/a (no compound empty)						429.862	1.10912		246.772	0.608593		3	0.548717	0.994314	1.11546
LOPAC Plate_16	E	7	N3288	(+)-Norfenfluramine hydrochloride	Serotonin		Agonist		the major hepatic metabolite of (+)-fenfluramine and is primarily responsible for the anorexic effect, as well as side effects; (+)-norfenfluramine causes vasoconstriction and a blood pressure increase	182.801	1.02198		241.763	0.902776		3	0.883361	0.916112	1.11556
LOPAC Plate_06	C	10	D193	DL-alpha-Difluoromethylornithine hydrochloride	Angiogenesis	Enzyme	Inhibitor	ODC	Selective irreversible ornithine decarboxylase (ODC) inhibitor.	287.171	0.964981		243.499	0.736		2	0.76271	0.864173	1.11665
LOPAC Plate_09	E	11	L9756	(-)-Tetramisole hydrochloride	Phosphorylation	Enzyme	Inhibitor		Inhibits multiple mammalian alkaline phosphatases	354.191	1.13088		386.584	0.919378		3	0.812976	1.01263	1.11678
LOPAC Plate_02	G	10	A265	ARL 67156 trisodium salt	P2 Receptor	Enzyme	Inhibitor	ecto-ATPase	ecto-ATPase inhibitor; prevents metabolism of P2 receptor agonists	174.804	1.01723		206.381	0.81742		Batch 1	0.803577	0.910343	1.11741
LOPAC Plate_08	C	6	Z4902	ZD 7114 hydrochloride	Adrenergics		Agonist	Beta-three	ZD 7114 is a selective ß3 adrenergic receptor agonist.	262.351	1.0926		395.774	1.01281		3	0.926969	0.977727	1.11749
LOPAC Plate_02	F	10	A263	ATPA	Glutamate		Agonist	Kainate	Selective kainate glutamate receptor agonist	164.654	0.958162		189.465	0.750419		Batch 1	0.783185	0.85721	1.11777
LOPAC Plate_09	G	11	L9908	LY-294,002 hydrochloride	Phosphorylation	Enzyme	Inhibitor	PI3K	Specific phosphatidylinositol 3-kinase (PI3K) inhibitor.	346.095	1.10503		317.769	0.755723		3	0.683893	0.988289	1.11812
LOPAC Plate_12	G	10	P5295	Piracetam	Glutamate		Modulator	AMPA	Prototypical nootropic; modulates Na+-flux at AMPA glutamate receptors	429.862	1.10912		342.297	0.844178		3	0.761124	0.991884	1.1182
LOPAC Plate_14	A	11	S8010	(±)-Sulpiride	Dopamine		Antagonist	D2	D2 Dopamine receptor antagonist; antipsychotic	275.834	1.31429		383.77	1.1361		3	0.86442	1.17512	1.11843
LOPAC Plate_15	G	5	T1505	Tetraisopropyl pyrophosphoramide	Biochemistry	Enzyme	Inhibitor	Butyrylcholinesterase	Selective inhibitor of butyrylcholinesterase	186.732	1.03264		288.936	0.994926		3	0.963478	0.92311	1.11865
LOPAC Plate_02	D	2	A7410	Amiloride hydrochloride	Na+ Channel		Blocker	Epithelial	Epithelial Na+ channel blocker	171.421	0.997539		175.932	0.696817		Batch 1	0.698537	0.890975	1.1196
LOPAC Plate_12	C	12	n/a (no compound empty)	n/a (no compound empty)						409.961	1.05777		378.119	0.932522		3	0.881591	0.944317	1.12014
LOPAC Plate_03	H	7	D3943	DAPH	Phosphorylation	Enzyme	Inhibitor	EGFR	Protein tyrosine kinase inhibitor, specific for EGFR; Also inhibits amyloid beta fibril formation.	142.239	1.24457		273.304	1.03356		2	0.830452	1.11053	1.1207
LOPAC Plate_02	H	11	B2009	Benzamide	Apoptosis	Enzyme	Inhibitor	PARS	Inhibitor of Poly(ADP-ribose) synthetase which is activated by nitric oxide; neuroprotective agent	208.637	1.21411		301.114	1.19263		Batch 1	0.982308	1.08268	1.12139
LOPAC Plate_09	H	10	L8539	L-687,384 hydrochloride	Opioid		Agonist	sigma1	Putative sigma-1 receptor agonist	358.239	1.1438		366.344	0.871244		3	0.761708	1.01868	1.12283
LOPAC Plate_13	A	3	P7412	Pirenzepine dihydrochloride	Cholinergic		Antagonist	M1	Selective M1 muscarinic acetylcholine receptor antagonist	265.354	1.20539		296.798	0.831973		3	0.690211	1.07132	1.12515
LOPAC Plate_03	H	8	S3322	Supercinnamaldehyde	Ion Channels		Activator	TRPA1	Transient receptor potential ankyrin 1 (TRPA1) receptor activator; covalently modifies cysteines to acitvate channel.	128.041	1.12034		315.897	1.19463		2	1.06631	0.995717	1.12516
LOPAC Plate_07	F	11	N2540	NS5806	Ion Channels		Modulator	Kv4.3	NS5806 increases peak current amplitude of the potassium channel Kv4.3	199.534	1.0987		188.312	0.793504		2	0.722222	0.97573	1.12603
LOPAC Plate_02	H	5	A9809	Amsacrine hydrochloride	DNA Repair	Enzyme	Inhibitor	TopoII	DNA topoisomerase II inhibitor	195.104	1.13536		219.915	0.871022		Batch 1	0.767179	1.00746	1.12695
LOPAC Plate_15	F	2	S9311	SIB 1893	Glutamate		Antagonist	mGluR5	Selective and noncompetitive antagonist of mGlu5 metabotropic glutamate receptor	210.319	1.16308		245.694	0.846026		3	0.727404	1.03158	1.12747
LOPAC Plate_09	A	3	I5879	3-Isobutyl-1-methylxanthine	Adenosine	Enzyme	Inhibitor	Phosphodiesterase	Potent phosphodiesterase inhibitor; more active than theophylline at adenosine receptors	378.479	1.20842		378.488	0.900124		3	0.744874	1.07132	1.12798
LOPAC Plate_11	B	5	N4163	Nemadipine-A	Ca2+ Channels		Antagonist	L-type (alpha1)	An L-type calcium channel alpha1-subunit antagonist.	405.98	1.0953		374.139	0.830023		3	0.757803	0.970281	1.12885
LOPAC Plate_14	G	8	SML0246	Tirofiban hydrochloride monohydrate	Cell Signaling	Enzyme	inhibitor	glycoprotein IIb/IIIa inhibitor	Tirofiban hydrochloride is a potent non-peptide, glycoprotein IIb/IIIa inhibitor	219.868	1.04762		295.822	0.87574		3	0.835934	0.927628	1.12935
LOPAC Plate_10	F	8	M5171	S-Methyl-L-thiocitrulline acetate	Nitric Oxide	Enzyme	Inhibitor	NOS	Potent inhibitor of NOS; more potent than L-thiocitrulline	293.473	0.984742		463.484	1.01328		3	1.02898	0.871692	1.12969
LOPAC Plate_03	H	1	n/a (no compound empty)	n/a (no compound empty)						170.634	1.49303		191.931	0.725827		2	0.486145	1.32096	1.13026
LOPAC Plate_02	B	7	PZ0014	Linezolid	Immune Signaling	Enzyme	Inhibitor	monoamine oxidase monoamine oxidase	Linezolid is an oxazolidinine antimicrobial. Linezolin is a weak, reversible, nonselective inhibitor of monoamine oxidase. Linezolid binds to a site on the bacterial 23S ribosomal RNA of the 50S subunit and prevents the formation of a functional 70S ...	168.037	0.977851		145.482	0.576214	Pipette damage	Batch 1	0.589266	0.864772	1.13076
LOPAC Plate_16	G	5	T200	TPMPA	GABA		Antagonist	GABA-C	Selective GABA-C receptor antagonist	186.732	1.04396		300.73	1.12296		3	1.07568	0.92311	1.13091
LOPAC Plate_14	G	7	S2250	(-)-Scopolamine methyl nitrate	Cholinergic		Antagonist	Muscarinic	Competitive muscarinic acetylcholine receptor antagonist	195.882	0.933333		287.827	0.852072		3	0.912934	0.82256	1.13467
LOPAC Plate_10	A	3	PZ0106	SC-236	Lipids	Enzyme	Inhibitor	COX-2	SC-236 is a COX-2 inhibitor.	362.287	1.21565		390.621	0.853985		3	0.702495	1.07132	1.13472
LOPAC Plate_03	B	4	S7067	SB 202190	Phosphorylation	Enzyme	Inhibitor	p38 MAPK	Highly selective, potent and cell permeable p38 MAP kinase inhibitor.	110.294	0.965061		205.865	0.778523		2	0.806709	0.849903	1.1355
LOPAC Plate_11	E	3	F0430	Fenobam	Glutamate		Antagonist	mGluR5	Potent, selective, noncompetitive glutamate mGluR5 receptor antagonist	453.743	1.22416		338.317	0.750553		3	0.613116	1.07789	1.13571
LOPAC Plate_16	B	9	A2731	AMG 9810	Ion Channels		Antagonist	TRPV1	Potent, non-vanilloid, antagonist of the TRPV1 receptor.	190.663	1.06593		222.108	0.829379		3	0.778078	0.937956	1.13644
LOPAC Plate_03	H	6	PZ0172	Gisadenafil besylate salt	Phosphodiesterase inhibitors	Enzyme	inhibitor	PDE5	Gisadenafil (UK 369003) is a PDE5 inhibitor. It is 80 fold selective over PDE6, and greater than 3000 fold selective over PDEs 1-4 and 7	135.14	1.18246		287.501	1.08725		2	0.919481	1.04009	1.13688
LOPAC Plate_15	D	4	S174	SDZ-205,557 hydrochloride	Serotonin		Antagonist	5-HT4	Potent and selective 5-HT4 serotonin receptor antagonist	202.457	1.1196		312.523	1.07614		3	0.961189	0.984444	1.13729
LOPAC Plate_07	A	6	U6758	UCL 2077	Ion Channels		Blocker	sAHP	Slow afterhyperpolarization (sAHP) channel blocker.	195.319	1.07549		158.803	0.669162		2	0.622195	0.943797	1.13953
LOPAC Plate_14	G	6	SML0720	Methazolamide	Enzyme Inhibitors	Enzyme	Inhibitor	Carbonic anhydrase	Methazolamide is a cell-permeable and potent carbonic anhydrase (CA) inhibitor.	235.858	1.12381		303.818	0.899409		3	0.800321	0.985245	1.14064
LOPAC Plate_11	C	11	N8784	Norcantharidin	Phosphorylation	Enzyme	Inhibitor	PP2A	Demethylated form of cantharidin with antitumor properties; potent inhibitor of the serine/threonine protein phosphatase 2A (PP2A)	449.763	1.21342		421.901	0.935984		3	0.771358	1.06285	1.14167
LOPAC Plate_10	G	2	SML0269	Nitisinone	Cell Stress	Enzyme	Inhibitor	4-Hydroxyphenylpyruvate oxidase	Nitrisinone is a competitive inhibitor that reversibly inhibits 4-Hydroxyphenylpyruvate oxidase (dioxygenase).	321.808	1.07982		414.909	0.907083		3	0.840032	0.94356	1.14441
LOPAC Plate_11	B	9	N5501	NG-Nitro-L-arginine	Nitric Oxide	Enzyme	Inhibitor	NOS	Potent nitric oxide synthase inhibitor	398.02	1.07383		382.099	0.847683		3	0.789405	0.937956	1.14486
LOPAC Plate_09	E	3	I7016	1-(5-Isoquinolinylsulfonyl)-2-methylpiperazine dihydrochloride	Phosphorylation	Enzyme	Inhibitor	PKA / PKC	Inhibitor of cyclic nucleotide dependent protein kinase (PKA) and protein kinase C (PKC)	386.574	1.23427		532.308	1.26594		3	1.02566	1.07789	1.14509
LOPAC Plate_13	G	9	P215	PD 98,059	Phosphorylation	Enzyme	Inhibitor	MEK2	Specific inhibitor of the activation of mitogen-activated protein kinase kinase (MAPKK)	226.043	1.02682		312.522	0.876051		3	0.853172	0.89631	1.1456
LOPAC Plate_14	D	8	S2876	Spermine tetrahydrochloride	Glutamate		Antagonist	NMDA-Polyamine	Binds to the polyamine modulatory site of the NMDA glutamate receptor, attenuating both NMDA and quisqualate mediated responses in vivo.	235.858	1.12381		315.81	0.934912		3	0.831913	0.980839	1.14576
LOPAC Plate_07	A	11	C1625	L-Canavanine	Cell Stress	Enzyme	Inhibitor	iNOS	Naturally occurring L-amino acid. Selective inhibitor of inducible nitric oxide synthase (iNOS).	220.612	1.21476		184.096	0.775741		2	0.638598	1.05926	1.1468
LOPAC Plate_06	E	9	D5676	N-Desmethylclozapine	Cholinergic		Antagonist	5-HT2 Serotonin/M1 Muscarinic	Major metabolite of clozapine; potent 5-HT2 serotonin receptor antagonist and a ligand for the cloned 5-HT6 and 5-HT7 serotonin receptors. Also an allosteric potentiator of M1 muscarinic receptors	310.991	1.04503		310.991	0.94		2	0.8995	0.910595	1.14763
LOPAC Plate_14	G	1	n/a (no compound empty)	n/a (no compound empty)						239.856	1.14286		259.844	0.76923		3	0.673076	0.994314	1.14939
LOPAC Plate_03	H	11	C2755	Cortisone	Hormone			Corticosteroid	Anti-inflammatory; corticosterone analog	142.239	1.24457		216.513	0.818792		2	0.65789	1.08268	1.14953
LOPAC Plate_10	D	9	SML0233	Ro 61-8048	Neuroscience	Enzyme	Inhibitor	KMO	Ro 61-8048 is an inhibitor of kynurenine 3-monooxygenase (KMO) that increases kynurenic acid levels and reduces extracellular glutamate in the brain	350.143	1.1749		414.909	0.907083		3	0.772052	1.02193	1.14969
LOPAC Plate_04	C	11	L5420	Lumefantrine	Immunomodulators and Antibiotics				Lumefantrine is is an antimalarial for the treatment of multi-drug resistant strains of falciparum malaria.	205.978	0.993309		322.797	0.92572		2	0.931956	0.863641	1.15014
LOPAC Plate_02	B	4	M152	2-(Methylthio)adenosine 5'-diphosphate trisodium salt hydrate	Purinoceptor		Agonist	P2	P2 purinoceptor agonist.	168.037	0.977851		192.848	0.763819		Batch 1	0.78112	0.849903	1.15054
LOPAC Plate_12	A	12	n/a (no compound empty)	n/a (no compound empty)						453.743	1.17074		509.466	1.25645		3	1.07321	1.01682	1.15137
LOPAC Plate_13	B	9	P178	PPADS	P2 Receptor		Antagonist	P2	Selective P2 receptor antagonist which blocks responses at both pre- and post-junctional sites	237.837	1.08039		312.522	0.876051		3	0.810867	0.937956	1.15185
LOPAC Plate_16	E	3	T8543	D-609 potassium	Lipid	Enzyme	Inhibitor	PIPLC	Xanthogenate derivative with in vitro anti-tumor and anti-HIV-1 activity; inhibits phospholipase D and phosphatidylcholine phospholipase C (PIPLC)	222.112	1.24175		273.212	1.02021		3	0.821589	1.07789	1.15203
LOPAC Plate_03	G	8	R1283	Rhodblock 6	Kinase/Phosphatase	Enzyme	Inhibitor	Rho	Rhodblock 6 is an inhibitor of the Rho Kinase pathway.	113.844	0.996118		255.557	0.966443		2	0.970209	0.864651	1.15205
LOPAC Plate_15	A	1	n/a (no compound empty)	n/a (no compound empty)						226.043	1.25003		261.423	0.900187		3	0.720131	1.08475	1.15237
LOPAC Plate_10	H	8	M5379	L-Methionine sulfoximine	Glutamate	Enzyme	Inhibitor	Glutamine synthase	Ornithine decarboxylase activator; glutamine synthetase inhibitor	313.712	1.05266		483.723	1.05753		3	1.00463	0.913333	1.15254
LOPAC Plate_02	D	8	A162	1-Amino-1-cyclohexanecarboxylic acid hydrochloride	Neurotransmission		Substrate		Synthetic amino acid that crosses the blood-brain barrier by the Large Neutral Amino Acid carrier system	154.504	0.899098		128.565	0.509213		Batch 1	0.56636	0.779857	1.1529
LOPAC Plate_05	D	8	D2763	Dihydroergotamine methanesulfonate	Serotonin		Antagonist		Ergot alkaloid; vasoconstrictor; competitive serotonin receptor antagonist; partial agonist at alpha adrenoceptors and D2 dopamine receptors	106.556	0.899204		144.464	0.951673		2	1.05835	0.779857	1.15304
LOPAC Plate_09	G	12	n/a (no compound empty)	n/a (no compound empty)						362.287	1.15673		435.158	1.0349		3	0.894678	1.00204	1.15437
LOPAC Plate_09	A	7	A1362	Agomelatine	Melatonins		Agonist	MT1/MT2	Agomelatine is an extremely potent agonist at both melatonin receptors (MT1 and MT2), with additional antagonism at 5HT2C	418.958	1.33767		257.051	0.611321		3	0.457005	1.15832	1.15483
LOPAC Plate_10	B	5	M2398	Metaproterenol hemisulfate	Adrenoceptor		Agonist	beta2	beta2-Adrenoceptor agonist	333.952	1.12057		576.825	1.26107		3	1.12538	0.970281	1.15489
LOPAC Plate_14	A	8	S2501	Spermidine trihydrochloride	Glutamate		Ligand	NMDA-Polyamine	Binds to the polyamine modulatory site of the NMDA glutamate receptor	255.846	1.21905		315.81	0.934912		3	0.76692	1.05534	1.15513
LOPAC Plate_11	F	2	M9125	Methapyrilene hydrochloride	Histamine		Antagonist	H1	H1 Histamine receptor antagonist	441.802	1.19195		441.802	0.980134		3	0.822297	1.03158	1.15546
LOPAC Plate_07	D	9	F100	Fluspirilene	Dopamine		Antagonist	D2/D1	Dopamine receptor antagonist; antipsychotic	182.672	1.00585		163.019	0.686925		2	0.68293	0.870488	1.1555
LOPAC Plate_15	E	4	S180	SB 206553 hydrochloride	Serotonin		Antagonist	5-HT2C/5-HT2B	Potent 5-HT2C/5-HT2B serotonin receptor antagonist	190.663	1.05438		281.074	0.967853		3	0.917937	0.912084	1.15601
LOPAC Plate_15	F	9	PZ0114	PD-166866	Tyrosine Kinase	Enzyme	Inhibitor	FGF-1	PD-166866 is a selective inhibitor of the FGF-1 receptor tyrosine kinase (FGFR1) with IC50 = 55 nM, and no effect on c-Src, PDGFR-b, EGFR or insulin receptor tyrosine kinases or MEK, PKC, and CDK4.	206.388	1.14134		257.488	0.886635		3	0.77684	0.985829	1.15774
LOPAC Plate_15	H	9	SML0817	Pivmecillinam	Antibiotics		Inhibitor	PBP2	Pivmecillinam is a gram negative antibiotic, and inhibitor of penicillin-binding protein 2 (PBP2).	214.25	1.18481		281.074	0.967853		3	0.816882	1.02216	1.15913
LOPAC Plate_14	H	10	S7936	SB 205384	GABA		Modulator	GABA-A	GABA-A receptor modulator selective for the alpha3beta2gamma2 subunit combination	247.851	1.18095		239.856	0.71006		3	0.60126	1.01868	1.1593
LOPAC Plate_05	G	6	D1260	Decamethonium dibromide	Cholinergic		Agonist	Nicotinic	Nicotinic acetylcholine receptor partial agonist; depolarizing neuromuscular blocker	128.072	1.08077		132.169	0.870679		2	0.805608	0.932068	1.15954
LOPAC Plate_11	D	3	M001	Proglumide	Cholecystokinin		Antagonist		Selective cholecystokinin receptor antagonist	461.703	1.24564		346.277	0.768213		3	0.616723	1.07315	1.16074
LOPAC Plate_14	D	4	R101	Ranitidine hydrochloride	Histamine		Antagonist	H2	H2 Histamine receptor antagonist; anti-ulcer agent	239.856	1.14286		323.806	0.95858		3	0.838758	0.984444	1.16092
LOPAC Plate_10	G	11	G5793	GR 127935 hydrochloride hydrate	Serotonin		Antagonist	5-HT1B/1D	Selective 5-HT1B/1D serotonin receptor antagonist.	342.048	1.14773		512.058	1.11947		3	0.975378	0.988289	1.16133
LOPAC Plate_06	B	12	n/a (no compound empty)	n/a (no compound empty)						370.543	1.24514		322.901	0.976		2	0.78385	1.07183	1.16169
LOPAC Plate_16	C	7	U105	U-62066	Opioid		Agonist	kappa	Highly selective kappa opioid receptor agonist; antitussive	194.594	1.08791		237.832	0.888096		3	0.816332	0.936399	1.1618
LOPAC Plate_13	A	11	Q3251	Quinacrine dihydrochloride	Neurotransmission	Enzyme	Inhibitor	MAO	Monoamine oxidase (MAO) inhibitor; antimalarial	300.734	1.3661		399.007	1.11848		3	0.818737	1.17512	1.16252
LOPAC Plate_14	E	2	R3255	13-cis-retinoic acid	Transcription		Regulator	RAR-alpha, beta	Anti-inflammatory and antitumor actions mediated through RAR-beta and RAR-alpha receptors	255.846	1.21905		263.842	0.781066		3	0.640718	1.04844	1.16272
LOPAC Plate_10	B	8	M4659	Milrinone	Cyclic Nucleotides	Enzyme	Inhibitor	PDE III	Phosphodiesterase III inhibitor	333.952	1.12057		451.34	0.98673		3	0.880562	0.963558	1.16295
LOPAC Plate_12	D	5	O9126	Oxotremorine sesquifumarate salt	Cholinergic		Agonist	M2	Muscarinic acetylcholine receptor agonist with preference for the M2 receptor	433.842	1.11939		350.258	0.86381		3	0.771679	0.962119	1.16346
LOPAC Plate_15	G	2	SML0679	Danshensu sodium salt	Cell Stress		Cardioprotectant		Suppresses the formation of reactive oxygen species, inhibits platelet adhesion and aggregation, and protects myocardium against ischemia.	198.526	1.09786		288.936	0.994926		3	0.906243	0.94356	1.16353
LOPAC Plate_14	C	4	R9644	Ribavirin	Cell Cycle	Enzyme	Inhibitor	IMP dehydrogenase	Antiviral agent; its metabolite, ribavirin 5'-phosphate, is an inhibitor of inosine monophosphate (IMP) dehydrogenase	231.86	1.10476		283.83	0.840237		3	0.760559	0.949178	1.16391
LOPAC Plate_10	G	8	M5250	Melatonin	Melatonin		Agonist		Endogenous neurohormone which controls photo-periodic biological rhythms	321.808	1.07982		467.532	1.02213		3	0.946572	0.927628	1.16407
LOPAC Plate_11	A	2	M8046	Mifepristone	Hormone		Antagonist	Progesterone	Progesterone receptor antagonist	489.565	1.32081		314.436	0.697573		3	0.528142	1.13449	1.16423
LOPAC Plate_10	A	9	M5391	(±)-Metoprolol (+)-tartrate	Adrenoceptor		Antagonist	beta1	Beta1-Adrenoceptor antagonist	398.718	1.33789		382.526	0.836286		3	0.625078	1.14831	1.16509
LOPAC Plate_07	G	11	G8134	Gallamine triethiodide	Cholinergic		Antagonist	M2	M2 muscarinic acetylcholine receptor antagonist; muscle relaxant	241.689	1.33082		297.915	1.25535		2	0.943291	1.14025	1.16712
LOPAC Plate_12	H	2	B2185	Bisoprolol hemifumarate salt	Adrenoceptor		Antagonist	Beta1	Cardioselective Beta1-adrenoceptor antagonist. Actual molecular weight is 383.48	469.664	1.21182		310.456	0.76565		3	0.63182	1.03784	1.16763
LOPAC Plate_14	C	9	S3378	Spironolactone	Hormone		Antagonist	Mineralocorticoid	Competitive antagonist of the cytoplasmic aldosterone receptor; diuretic	255.846	1.21905		287.827	0.852072		3	0.698965	1.04357	1.16815
LOPAC Plate_16	E	4	T103	Trifluperidol hydrochloride	Dopamine		Antagonist	D1/D2	Dopamine receptor antagonist; antipsychotic	190.663	1.06593		237.832	0.888096		3	0.833164	0.912084	1.16868
LOPAC Plate_13	B	10	SML0678	Pyridostatin trifluoroacetate salt	Gene Regulation		Stabilizer	G-quadruplex	Pyridostatin stabilizes G-quadruplexes, targeting the proto-oncogene SRC and telomeric G-quadruplexes, inducing DNA damage and cell-cycle arrest. MW given as free base.	273.216	1.2411		399.007	1.11848		3	0.901198	1.06114	1.1696
LOPAC Plate_03	C	7	B112	(±)-Bay K 8644	Ca2+ Channel		Agonist	L-type	L-type Ca2+ channel agonist	124.492	1.08929		209.415	0.791946		2	0.727031	0.930369	1.17081
LOPAC Plate_09	A	11	PZ0100	CP-154526 hydrochloride	Neurotransmission		Antagonist	CRF1	CP-154526 is a selective, non-peptide antagonist of corticotropin releasing factor receptors (CRF1).	431.101	1.37644		285.386	0.678709		3	0.493089	1.17512	1.17132
LOPAC Plate_16	H	4	PZ0196	Tenidap	Lipid Signaling	Enzyme	Inhibitor	COX-1 > COX-2	Anti-inflammatory COX-1 / COX-2 inhibitor.	182.801	1.02198		237.832	0.888096		3	0.868998	0.872072	1.1719
LOPAC Plate_02	G	9	A236	AB-MECA	Adenosine		Agonist	A3	High affinity A3 adenosine receptor agonist	171.421	0.997539		182.698	0.723618		Batch 1	0.725403	0.850024	1.17354
LOPAC Plate_13	F	6	T6580	Triflusal	Anticoagulants	Enzyme	Inhibitor	COX-1	Triflusal is an anti-inflammatory antithrombotic platelet aggregation inhibitor with a 3-fold mechanism of action	233.905	1.06253		304.66	0.854012		3	0.803753	0.905265	1.17372
LOPAC Plate_09	A	4	I7627	Iproniazid phosphate	Neurotransmission	Enzyme	Inhibitor	MAO	Monoamine oxidase inhibitor	390.622	1.2472		248.955	0.592068		3	0.474718	1.06219	1.17417
LOPAC Plate_06	C	12	n/a (no compound empty)	n/a (no compound empty)						358.632	1.20511		318.931	0.964		2	0.799924	1.02624	1.1743
LOPAC Plate_15	A	11	T6764	Triprolidine hydrochloride	Histamine		Antagonist	H1	Potent H1 histamine receptor antagonist	249.63	1.38047		296.799	1.022		3	0.740328	1.17512	1.17474
LOPAC Plate_16	B	11	Y101	YS-035 hydrochloride	Ca2+ Channel		Blocker	L-type	L-type Ca2+ channel blocker; verapamil derivative	226.043	1.26373		277.143	1.03489		3	0.818916	1.07452	1.17609
LOPAC Plate_05	E	2	E9531	Ebastine	Histaminergics		Antagonist	H1	Nonsedating histamine H1 receptor antagonist without cardiac side effects at 5X effective dose.	131.145	1.10671		178.275	1.1744		2	1.06117	0.940319	1.17695
LOPAC Plate_02	F	6	A013	8-(p-Sulfophenyl)theophylline	Adenosine		Antagonist	A1 > A2	Adenosine receptor antagonist with selectivity for A1 over A2	168.037	0.977851		169.165	0.670017		Batch 1	0.685193	0.830771	1.17704
LOPAC Plate_11	A	11	N8652	NF 023	P2 Receptor		Antagonist	P2X1	Potent, selective P2X1 receptor antagonist	513.446	1.38524		489.565	1.08609		3	0.78405	1.17512	1.1788
LOPAC Plate_10	F	11	M7684	MRS 2159	P2 Receptor		Antagonist	P2X1	P2X1 receptor antagonist	358.239	1.20206		491.819	1.07523		3	0.894483	1.01944	1.17914
LOPAC Plate_15	G	6	T2265	Tetraethylammonium chloride	Cholinergic		Antagonist	Nicotinic	Nicotinic acetylcholine receptor antagonist; K+ channel blocker	210.319	1.16308		281.074	0.967853		3	0.83215	0.985245	1.18049
LOPAC Plate_09	D	6	I146	IB-MECA	Adenosine		Agonist	A3	Selective A3 adenosine receptor agonist	350.143	1.11795		301.578	0.717216		3	0.641543	0.946967	1.18056
LOPAC Plate_02	E	5	A9657	(±)-p-Aminoglutethimide	Biochemistry	Enzyme	Inhibitor	P450-dependendent hydroxylation	Inhibits Cytochrome P450-dependent hydroxylation reactions that are necessary for aromatization	164.654	0.958162		175.932	0.696817		Batch 1	0.727244	0.811428	1.18083
LOPAC Plate_15	D	2	Z1252	Zofenopril calcium	Angiotensin	Enzyme	Inhibitor	ACE	Zofenopril is a long-lasting, lipophilic ACE inhibitor	222.112	1.22829		292.868	1.00846		3	0.821028	1.04016	1.18087
LOPAC Plate_16	F	4	T104	3-Tropanyl-indole-3-carboxylate hydrochloride	Serotonin		Antagonist	5-HT3	Selective 5-HT3 serotonin receptor antagonist	194.594	1.08791		245.694	0.917455		3	0.843319	0.921165	1.18102
LOPAC Plate_07	H	9	F132	Fluoxetine hydrochloride	Serotonin		Inhibitor	Reuptake	Selective serotonin reuptake inhibitor	258.552	1.42366		335.855	1.41521		2	0.994066	1.2054	1.18107
LOPAC Plate_15	D	6	T1698	Tetradecylthioacetic acid	Transcription		Agonist	PPAR-alpha	Peroxisome proliferator-activated receptor (PPAR)-alpha agonist	202.457	1.1196		288.936	0.994926		3	0.888647	0.946967	1.1823
LOPAC Plate_14	F	3	R7385	Phosphoramidon disodium	Biochemistry	Enzyme	Inhibitor	Endopeptidase	Inhibitor of mammalian enkephalinase and some metallo-endopeptidases; potent inhibitor of thermolysin and other bacterial metallo-endopeptidases	243.853	1.16191		303.818	0.899409		3	0.774081	0.981998	1.18321
LOPAC Plate_10	D	8	M4910	1-Methylhistamine dihydrochloride	Histamine		Metabolite		Histamine metabolite that crosses the blood-brain barrier	346.095	1.16132		402.765	0.880534		3	0.758221	0.980839	1.184
LOPAC Plate_11	C	3	M9656	H-8 dihydrochloride	Phosphorylation	Enzyme	Inhibitor	PKA, PKG	Potent inhibitor of cAMP- and cGMP-dependent protein kinase	421.901	1.13826		330.357	0.732893		3	0.643874	0.96115	1.18426
LOPAC Plate_16	A	1	n/a (no compound empty)	n/a (no compound empty)						229.974	1.28571		261.423	0.976188		3	0.759262	1.08475	1.18526
LOPAC Plate_10	C	1	n/a (no compound empty)	n/a (no compound empty)						338	1.13415		366.335	0.80089		3	0.706158	0.9565	1.18573
LOPAC Plate_16	A	7	U103	U-69593	Opioid		Agonist	kappa	Selective kappa opioid receptor agonist	245.699	1.37362		222.108	0.829379		3	0.603792	1.15832	1.18586
LOPAC Plate_06	D	12	n/a (no compound empty)	n/a (no compound empty)						354.662	1.19177		275.26	0.832		2	0.698119	1.0042	1.18679
LOPAC Plate_11	A	9	E2535	Eprosartan mesylate	Angiotensins		Antagonist	AT 1	Angiotensin II type 1 (AT1) receptor antagonist; anti-hypertensive	505.485	1.36376		469.664	1.04194		3	0.764024	1.14831	1.18762
LOPAC Plate_13	G	4	P8688	(S)-Propranolol hydrochloride	Adrenoceptor		Blocker	beta	Active beta-adrenoceptor receptor blocking enantiomer; 5-HT1 serotonin receptor antagonist	229.974	1.04467		367.558	1.03032		3	0.986264	0.879611	1.18765
LOPAC Plate_12	B	12	n/a (no compound empty)	n/a (no compound empty)						445.782	1.1502		461.703	1.13866		3	0.989967	0.968028	1.18819
LOPAC Plate_09	A	6	I135	Imetit dihydrobromide	Histamine		Agonist	H3	Potent and selective H3 histamine receptor agonist	410.862	1.31182		289.434	0.688335		3	0.524718	1.10308	1.18923
LOPAC Plate_10	A	10	PZ0139	SC-58125	Lipids	Enzyme	Inhibitor	COX-2	SC-58125 is a selective cyclooxygenase 2 (COX-2) inhibitor	374.431	1.25639		390.621	0.853985		3	0.679711	1.05643	1.18928
LOPAC Plate_05	C	4	C144	1-(m-Chlorophenyl)-biguanide hydrochloride	Serotonin		Agonist	5-HT3	5-HT3 serotonergic receptor agonist	115.777	0.977019		141.39	0.931424		2	0.953332	0.820637	1.19056
LOPAC Plate_11	D	6	L8668	Levetiracetam	Neurotransmission		Anticonvulsant		Anticonvulsant; antiepileptic; exact mechanism of action is unclear but may be related to a synaptic vesicle protein.	417.921	1.12752		334.337	0.741723		3	0.657837	0.946967	1.19066
LOPAC Plate_16	B	10	A4233	Ara-G hydrate	Apoptosis		inducer		Ara-G is an inducer of apoptosis; inhibitor of DNA synthesis; antineoplastic; and antimetabolite.	226.043	1.26373		226.039	0.844059		3	0.667911	1.06114	1.19092
LOPAC Plate_12	G	9	P4509	Palmitoyl-DL-Carnitine chloride	Phosphorylation	Enzyme	Modulator	PKC	Long-chain acylcarnitine; modulator of PKC activation; intermediate in mitochondrial fatty acid oxidation	413.941	1.06804		354.238	0.873626		3	0.81797	0.89631	1.1916
LOPAC Plate_15	F	4	G3796	Granisetron hydrochloride	Serotonin		Antagonist	5-HT3	serotonin 5-HT3 receptor antagonist and antiemetic	198.526	1.09786		265.35	0.913708		3	0.832264	0.921165	1.19181
LOPAC Plate_13	C	7	P102	R(+)-3PPP hydrochloride	Dopamine		Agonist	D2	Binds with high selectivity to sigma receptors, yet has no affinity for phencyclidine receptors; dopamine receptor agonist	245.699	1.1161		320.385	0.89809		3	0.804666	0.936399	1.19191
LOPAC Plate_16	G	6	U100	Urapidil hydrochloride	Adrenoceptor		Antagonist	alpha1	alpha1 Adrenoceptor antagonist and 5-HT1A serotonin receptor partial agonist; antihypertensive	210.319	1.17582		304.661	1.13764		3	0.967532	0.985245	1.19343
LOPAC Plate_09	H	9	L4900	Lonidamine	Cell Stress	Enzyme	Inhibitor	Mitochondrial hexokinase	Inhibits the energy metabolism of neoplastic cells by interfering with mitochondrial hexokinase, cellular respiration, and glycolysis; damages cell and mitochondrial membranes	382.527	1.22135		394.679	0.938631		3	0.76852	1.02216	1.19487
LOPAC Plate_02	C	6	A9899	Antozoline hydrochloride	Imidazoline		Agonist		Imidazoline agonist; more potent than efaroxan in inducing insulin release from beta cells; H1 histamine receptor antagonist	151.121	0.879409		128.565	0.509213		Batch 1	0.579039	0.735625	1.19546
LOPAC Plate_05	A	5	C199	CGS-15943	Adenosine		Antagonist	A1	Highly potent, non-selective A1 adenosine receptor antagonist	143.44	1.21046		224.38	1.47813		2	1.22113	1.01206	1.19605
LOPAC Plate_14	C	5	R116	Riluzole	Glutamate		Antagonist	Release	Glutamate release inhibitor; anticonvulsant	215.87	1.02857		287.827	0.852072		3	0.828403	0.859368	1.19689
LOPAC Plate_03	C	9	C0400	Carmustine	DNA		Intercalator		DNA alkylating agent; causes interstrand crosslinks	135.14	1.18246		237.81	0.899329		2	0.760559	0.987921	1.19692
LOPAC Plate_16	C	8	V1377	Vinblastine sulfate salt	Cytoskeleton and ECM		Inhibitor	Tubulin	Inhibitor of microtubule assembly	202.457	1.13187		292.868	1.09361		3	0.966198	0.945073	1.19765
LOPAC Plate_11	F	6	N1016	Nimesulide	Prostaglandin	Enzyme	Inhibitor	COX-2	Highly selective COX-2 inhibitor	402	1.08456		334.337	0.741723		3	0.68389	0.905265	1.19806
LOPAC Plate_08	E	1	n/a (no compound empty)	n/a (no compound empty)						315.713	1.31484		364.629	0.933105		3	0.709674	1.09737	1.19818
LOPAC Plate_11	A	10	N7510	Nicardipine hydrochloride	Ca2+ Channel		Antagonist	L-type	L-type Ca2+ channel antagonist; antihypertensive	469.664	1.26711		493.545	1.09492		3	0.864108	1.05643	1.19943
LOPAC Plate_07	C	5	E114	erythro-9-(2-Hydroxy-3-nonyl)adenine hydrochloride	Adenosine	Enzyme	Inhibitor	Adenosine deaminase	Potent adenosine deaminase inhibitor	174.241	0.959427		167.235	0.704688		2	0.734489	0.799787	1.1996
LOPAC Plate_11	B	6	S7198	Sivelestat sodium salt hydrate	Biochemistry	Enzyme Enzyme	Inhibitor	HNE	Sivelestat is a competitive human neutrophil elastase (HNE) inhibitor (IC50 = 44 nM, Ki = 0.2 µM). It also inhibits leukocyte elastase obtained from rabbit, rat, hamster and mouse (IC50 = 19 to 49 nM).	457.723	1.2349		358.218	0.794703		3	0.643537	1.02818	1.20105
LOPAC Plate_16	C	6	C9369	CCT007093	Apoptosis	Enzyme	Activator	PPM1D	An effective PPM1D inhibitor that selectively reduces viability of human tumour cell lines.	210.319	1.17582		261.419	0.976172		3	0.830205	0.977727	1.20261
LOPAC Plate_09	E	12	n/a (no compound empty)	n/a (no compound empty)						386.574	1.23427		447.302	1.06378		3	0.861867	1.02608	1.20291
LOPAC Plate_14	D	10	C1494	Carmofur	Apoptosis				Carmofur is a derivative of fluorouracil, an antimetabolite used as an antineoplastic agent.	267.839	1.27619		311.813	0.923077		3	0.723307	1.05913	1.20494
LOPAC Plate_12	D	1	n/a (no compound empty)	n/a (no compound empty)						485.584	1.25289		234.832	0.579145		3	0.462246	1.03928	1.20554
LOPAC Plate_13	B	6	P9297	Paromomycin sulfate	Antibiotic			Protein synthesis	Oligosacchiride-type antibiotic; interferes with protein synthesis	273.216	1.2411		304.66	0.854012		3	0.688107	1.02818	1.20709
LOPAC Plate_14	D	5	H8664	Steviol	Ion Channels		Inhibitor	hOAT1/hOAT3	Inhibits human organic ion transporters OAT1 and OAT3, targets important for studying renal clearance of drugs.	243.853	1.16191		311.813	0.923077		3	0.794452	0.962119	1.20765
LOPAC Plate_07	F	2	E3380	Ellipticine	Cell Cycle	Enzyme	Inhibitor	CYP1A1 / TopoII	Cytochrome P450 (CYP1A1)and DNA topoisomerase II inhibitor	224.827	1.23797		470.75	1.98364		2	1.60233	1.02507	1.20769
LOPAC Plate_06	A	12	n/a (no compound empty)	n/a (no compound empty)						422.154	1.41857		334.812	1.012		2	0.713397	1.17356	1.20877
LOPAC Plate_05	C	8	C3993	Carvedilol	Adrenoceptor		Blocker	alpha1/beta	Antihypertensive; cardioprotective	121.924	1.0289		199.791	1.31614		2	1.27918	0.85073	1.20943
LOPAC Plate_10	H	2	L131	L-745,870 hydrochloride	Dopamine		Antagonist	D4	Selective D4 dopamine receptor antagonist	374.431	1.25639		459.436	1.00443		3	0.799453	1.03784	1.21059
LOPAC Plate_14	H	9	T7080	Tazarotene	Cell Biology		Inducer	TIG3	Tazarotene induces the expression of tazarotene-induced gene 3 (TIG3), a tumor suppressor gene	259.844	1.2381		267.839	0.7929		3	0.640419	1.02216	1.21126
LOPAC Plate_15	C	6	T1694	(E)-4-amino-2-butenoic acid	GABA		Agonist	GABA-C	Potent GABA-C receptor agonist.	214.25	1.18481		300.73	1.03554		3	0.874006	0.977727	1.2118
LOPAC Plate_13	F	1	n/a (no compound empty)	n/a (no compound empty)						261.423	1.18753		206.388	0.578538		3	0.487177	0.979213	1.21274
LOPAC Plate_11	B	4	SML0612	Perifosine	Phosphorylation	Enzyme	Inhibitor	PKB/Akt	Perifosine (KRX-0401) is a selective bioavailable alkylphospholipid inhibitor of protein kinase B/Akt (PKB/Akt) with anti-proliferative activity.	485.584	1.31007		354.238	0.785873		3	0.599872	1.07996	1.21307
LOPAC Plate_09	H	12	n/a (no compound empty)	n/a (no compound empty)						374.431	1.1955		439.206	1.04453		3	0.873714	0.983515	1.21554
LOPAC Plate_12	E	1	n/a (no compound empty)	n/a (no compound empty)						517.426	1.33505		234.832	0.579145		3	0.4338	1.09737	1.2166
LOPAC Plate_14	E	10	S7771	(-)-Sulpiride	Dopamine		Antagonist	D2	D2 dopamine receptor antagonist; antipsychotic	259.844	1.2381		275.834	0.816569		3	0.659536	1.01469	1.22017
LOPAC Plate_15	B	5	T0625	Taurine	Glycine		Agonist		Non-selective endogenous agonist at glycine receptors	214.25	1.18481		257.488	0.886635		3	0.748332	0.970281	1.2211
LOPAC Plate_09	D	3	I6504	(-)-Isoproterenol hydrochloride	Adrenoceptor		Agonist	beta	beta-Adrenoceptor agonist; increases cytosolic cAMP	410.862	1.31182		471.589	1.12154		3	0.85495	1.07315	1.22241
LOPAC Plate_15	G	4	T0254	L-Tryptophan	Serotonin		Precursor		Antidepressant; precursor of serotonin	194.595	1.07612		292.868	1.00846		3	0.93713	0.879611	1.2234
LOPAC Plate_03	B	10	C0987	CGP-13501	GABA		Modulator	GABA-B	Positive allosteric modulator of GABA-B receptors	138.69	1.21352		252.007	0.95302		2	0.785338	0.986993	1.22951
LOPAC Plate_09	F	10	L8401	LE 300	Dopamine		Antagonist	D1	Potent, selective D1 dopamine receptor antagonist	390.622	1.2472		394.679	0.938631		3	0.752592	1.01319	1.23097
LOPAC Plate_14	G	2	R2530	Ropinirole hydrochloride	Dopamine		Agonist	D3	Agonist at the D2 and D3 dopamine receptor subtypes, binding with higher affinity to D3 than to D2 or D4	243.853	1.16191		299.82	0.887574		3	0.763896	0.94356	1.23141
LOPAC Plate_14	B	2	R1402	Raloxifene hydrochloride	Hormone		Modulator	ER	Estrogen receptor modulator; anti-estrogenic drug	243.853	1.16191		319.808	0.946746		3	0.814822	0.943127	1.23197
LOPAC Plate_11	C	4	M110	alpha-Methyl-5-hydroxytryptamine maleate	Serotonin		Agonist	5-HT2	5-HT2 Serotonin receptor agonist	433.842	1.17047		346.277	0.768213		3	0.656329	0.949178	1.23314
LOPAC Plate_06	E	12	n/a (no compound empty)	n/a (no compound empty)						378.483	1.27182		346.722	1.048		2	0.824017	1.03135	1.23316
LOPAC Plate_14	F	11	SML0209	ANA-12	Cytokines			TrkB	ANA-12 is a TrkB ligand that prevents activation of the receptor by BDNF with a high potency	263.841	1.25714		343.794	1.01775		3	0.809575	1.01944	1.23317
LOPAC Plate_03	A	11	C1671	Chlorprothixene hydrochloride	Dopamine		Antagonist	D2	D2 dopamine receptor antagonist; blocks a subset of GABA-A receptors in rat cortex that is also blocked by clozapine	149.338	1.30669		266.205	1.00671		2	0.770431	1.05926	1.23359
LOPAC Plate_11	B	7	N2001	Neostigmine bromide	Cholinergic	Enzyme	Inhibitor	Acetylcholinesterase	Reversible acetylcholinesterase inhibitor.	445.782	1.20268		358.218	0.794703		3	0.660774	0.974902	1.23365
LOPAC Plate_14	B	5	R115	Reactive Blue 2	P2 Receptor		Antagonist	P2Y	P2Y receptor antagonist; most potent antagonist for ATP-activated channels	251.848	1.2		287.827	0.852072		3	0.710059	0.970281	1.23676
LOPAC Plate_11	C	5	M3071	Moclobemide	Neurotransmission	Enzyme	Inhibitor	MAO	Reversible monoamine oxidase A inhibitor (MAOI); antidepressant.	394.04	1.06309		362.198	0.803533		3	0.755848	0.859368	1.23706
LOPAC Plate_14	A	4	R8900	Ro 8-4304	Glutamate		Antagonist	NMDA-NR2B	NR2B-selective, noncompetitive NMDA receptor antagonist	275.834	1.31429		315.81	0.934912		3	0.711346	1.06219	1.23733
LOPAC Plate_10	B	9	M5435	6-Methyl-2-(phenylethynyl)pyridine hydrochloride	Glutamate		Antagonist	mGluR5	Highly selective, non-competitive mGluR5 metabotropic glutamate receptor antagonist	346.095	1.16132		418.957	0.915933		3	0.788702	0.937956	1.23814
LOPAC Plate_10	E	10	M6524	Methoxamine hydrochloride	Adrenoceptor		Agonist	alpha1	alpha1 Adrenoceptor agonist	374.431	1.25639		487.771	1.06638		3	0.848759	1.01469	1.23821
LOPAC Plate_15	A	4	S154	Sepiapterin	Nitric Oxide	Enzyme	Cofactor	NOS	Cofactor of nitric oxide synthase; intracellularly converted to tetrahydrobiopterin .	237.837	1.31525		277.143	0.954317		3	0.725579	1.06219	1.23824
LOPAC Plate_03	E	11	P5749	S-(+)-PD 123177 trifluoroacetate salt hydrate	Neurotransmission		Antagonist	AT2	Selective AT2 angiotensin receptor antagonist	120.943	1.05823		216.513	0.818792		2	0.773736	0.852984	1.24062
LOPAC Plate_08	F	5	H4759	Hydrochlorothiazide	Biochemistry	Enzyme	Inhibitor	Carbonic anhydrase	Carbonic anhydrase inhibitor; diuretic	262.351	1.0926		355.752	0.910387		3	0.833231	0.879541	1.24224
LOPAC Plate_11	H	1	n/a (no compound empty)	n/a (no compound empty)						441.802	1.19195		469.664	1.04194		3	0.874153	0.958922	1.24301
LOPAC Plate_02	H	6	A023	2-Methylthioadenosine triphosphate tetrasodium	P2 Receptor		Agonist	P2Y	P2Y receptor agonist	222.17	1.29286		257.131	1.01843		Batch 1	0.787729	1.04009	1.24302
LOPAC Plate_12	F	2	N156	Naltriben methanesulfonate	Opioid		Antagonist	delta2	Highly selective delta2 opioid receptor antagonist	497.525	1.2837		366.178	0.903074		3	0.703491	1.03158	1.24441
LOPAC Plate_15	D	9	SML0841	Nedocromil	Immune Signaling		Stabilizer	Mast cell	Nedocromil is a mast cell stabilizer and anti-inflammatory and anti-allergic drug.	229.974	1.27177		269.281	0.927244		3	0.729097	1.02193	1.24448
LOPAC Plate_15	A	10	T5625	(±)-alpha-Lipoic Acid	Cell Stress	Enzyme	Coenzyme	Pyruvate dehydrogenase	Coenzyme needed for the activity of enzyme complexes such as those of pyruvate dehydrogenase and glycine decarboxylase	237.837	1.31525		261.419	0.900171		3	0.684411	1.05643	1.24499
LOPAC Plate_09	A	1	n/a (no compound empty)	n/a (no compound empty)						423.006	1.35059		277.281	0.659433		3	0.488255	1.08475	1.24507
LOPAC Plate_03	D	10	C1159	L-Cycloserine	Sphingolipid	Enzyme	Inhibitor	Ketosphinganine synthetase	Blocks sphingosine biosynthesis by inhibition of ketosphinganine synthetase	145.788	1.27563		220.063	0.832215		2	0.652396	1.02453	1.24509
LOPAC Plate_16	D	11	Z0878	Zaprinast	Cyclic Nucleotides	Enzyme	Inhibitor	PDE V	Selective cGMP-phosphodiesterase type V inhibitor	265.354	1.4835		265.35	0.990851		3	0.667913	1.19067	1.24594
LOPAC Plate_02	D	3	A8404	Amitriptyline hydrochloride	Adrenoceptor		Inhibitor	Uptake	Tricyclic antidepressant	191.72	1.11567		175.932	0.696817		Batch 1	0.624574	0.895008	1.24655
LOPAC Plate_05	G	3	C1335	S-(-)-Carbidopa	Biochemistry	Enzyme	Inhibitor	L-aromatic amino acid decarboxylase	Peripherally active L-aromatic amino acid decarboxylase inhibitor; used in combination with levodopa for the treatment of Parkinson's Disease.	146.514	1.2364		178.275	1.1744		2	0.949855	0.990874	1.24779
LOPAC Plate_14	G	10	S7882	(-)-Scopolamine,n-Butyl-, bromide	Cholinergic		Antagonist	Muscarinic	Cholinergic receptor antagonist	259.844	1.2381		291.825	0.863906		3	0.69777	0.991884	1.24823
LOPAC Plate_14	D	9	S4063	SCH-202676 hydrobromide	G protein		Modulator	GPCR	Allosteric agonist and antagonist of G protein coupled receptors (GPCRs)	267.839	1.27619		267.839	0.7929		3	0.621302	1.02193	1.24881
LOPAC Plate_11	D	2	SML0683	JNJ-40418677	Neurobiology	Enzyme	Modulator	gamma-Secretase	JNJ-40418677 is a gamma-secretase modulator.	481.604	1.29933		294.535	0.653423		3	0.502892	1.04016	1.24917
LOPAC Plate_10	G	9	M5685	Metrazoline oxalate	Imidazoline		Ligand		Potent and selective imidazoline binding site ligand	333.952	1.12057		427.053	0.933632		3	0.833177	0.89631	1.2502
LOPAC Plate_10	D	10	M6517	alpha,beta-Methylene adenosine 5'-triphosphate dilithium	P2 Receptor		Agonist	P2X > P2Y	P2 receptor agonist that is more potent than ATP at the P2X subtype	394.67	1.32431		447.292	0.97788		3	0.738408	1.05913	1.25037
LOPAC Plate_03	F	7	B135	R(+)-6-Bromo-APB hydrobromide	Dopamine		Agonist	D1/D5	D1 Dopamine receptor agonist	124.492	1.08929		170.371	0.644295		2	0.591483	0.871111	1.25046
LOPAC Plate_16	B	6	U5882	U-74389G maleate	Cell Stress		Inhibitor		Free radical lipid peroxidation inhibitor	229.974	1.28571		257.488	0.961493		3	0.747832	1.02818	1.25047
LOPAC Plate_03	E	8	B173	BRL 54443 maleate	Serotonin		Agonist	5-HT1E/1F	Potent 5-HT1E/1F serotonin receptor agonist	110.294	0.965061		241.359	0.912752		2	0.945797	0.77167	1.25061
LOPAC Plate_09	B	6	I138	1,5-Isoquinolinediol	Apoptosis	Enzyme	Inhibitor	PARS	Potent inhibitor of Poly(ADP-ribose) synthetase which is activated by nitric oxide; neuroprotective agent	402.766	1.28597		309.674	0.736469		3	0.572695	1.02818	1.25072
LOPAC Plate_11	B	3	M9651	Maprotiline hydrochloride	Adrenoceptor		Inhibitor	Reuptake	Selective norepinephrine reuptake inhibitor	445.782	1.20268		362.198	0.803533		3	0.668116	0.960408	1.25226
LOPAC Plate_03	B	8	B161	B-HT 933 dihydrochloride	Adrenoceptor		Agonist	alpha2	Selective alpha2 adrenoceptor agonist	120.943	1.05823		244.909	0.926174		2	0.87521	0.844713	1.25277
LOPAC Plate_16	H	6	U101	Urapidil, 5-Methyl-	Adrenoceptor		Antagonist	alpha1A	Selective alpha1A adrenoceptor antagonist; antihypertensive	226.043	1.26373		371.49	1.38719		3	1.0977	1.00748	1.25435
LOPAC Plate_15	B	6	T1633	Theophylline	Adenosine		Antagonist	A1 > A2	Selective A1 adenosine receptor antagonist.	233.905	1.29351		249.626	0.859562		3	0.664519	1.02818	1.25806
LOPAC Plate_15	E	9	SML0226	Pseudocantharidin C	Gene Regulation			PP2A	Pseudocantharidin C stimulates PP2A activity up to two-fold without influencing PP1	233.905	1.29351		285.005	0.98139		3	0.758703	1.02718	1.25928
LOPAC Plate_13	A	10	SML0704	1-Methylnicotinamide chloride	Inflammation		Metabolite		1-Methylnicotinamide (MNA) has been shown to have antithrombotic and anti-inflammatory effects.	292.872	1.33039		347.902	0.975226		3	0.733038	1.05643	1.25932
LOPAC Plate_16	A	8	U116	U-99194A maleate	Dopamine		Antagonist	D3	D3 dopamine receptor antagonist	237.837	1.32966		249.626	0.932134		3	0.701031	1.05534	1.25994
LOPAC Plate_02	G	6	A022	1,3-Dipropyl-8-p-sulfophenylxanthine	Adenosine		Antagonist	A1 > A2	Adenosine receptor antagonist with slight selectivity for A1 over A2	201.87	1.17473		209.765	0.830821		Batch 1	0.707242	0.932068	1.26035
LOPAC Plate_14	F	6	S0758	Sulfaphenazole	Multi-Drug Resistance	Enzyme	Inhibitor	Cytochrome P4502C	Antibacterial; inhibitor of cytochrome P4502C enzymes	239.856	1.14286		267.839	0.7929		3	0.693787	0.905265	1.26246
LOPAC Plate_16	F	3	T9025	Thioridazine hydrochloride	Dopamine		Antagonist	D1/D2	Dopamine receptor antagonist; Ca2+ channel antagonist; antipsychotic	222.112	1.24175		261.419	0.976172		3	0.786125	0.981998	1.26452
LOPAC Plate_14	H	2	R5010	Resveratrol	Prostaglandin	Enzyme	Inhibitor	COX	Prevents apoptosis in K562 cells by inhibiting lipoxygenase and cyclooxygenase activity	275.834	1.31429		271.837	0.804734		3	0.612297	1.03784	1.26637
LOPAC Plate_07	H	12	n/a (no compound empty)	n/a (no compound empty)						275.413	1.51651		302.13	1.27311		2	0.839499	1.1957	1.2683
LOPAC Plate_15	F	11	T7254	Na-p-Tosyl-L-lysine chloromethyl ketone hydrochloride	Cyclic Nucleotides	Enzyme	Inhibitor	Adenylyl cyclase	Adenylyl cyclase inhibitor; blocks the LPS- or cytokine-induced activation of nuclear factor kB (NFkB)	233.905	1.29351		273.212	0.940781		3	0.727308	1.01944	1.26884
LOPAC Plate_14	C	8	S2816	SKF 83959 hydrobromide	Dopamine		Agonist	D1	Atypical D1 dopamine receptor agonist; displays antagonist activity in vitro and agonist activity in vivo	251.848	1.2		359.784	1.06509		3	0.887574	0.945073	1.26974
LOPAC Plate_14	B	7	SML0752	(+)-CP-99994 dihydrochloride	Tachykinins		Antagonist	NK-1	(+)-CP-99994 is a selective neurokinin (NK)-1 tachykinin antagonist.	259.844	1.2381		347.791	1.02959		3	0.831589	0.974902	1.26997
LOPAC Plate_11	A	7	O0766	ONO-RS-082	Lipids	Enzyme	Inhibitor	phospholipase A2	ONO-RS-082 is a reversible phospholipase A2 inhibitor.	545.287	1.47114		445.782	0.988964		3	0.672243	1.15832	1.27006
LOPAC Plate_12	H	10	P5396	Phosphomycin disodium	Antibiotic			Cell wall synthesis	Antibiotic; interferes with cell wall synthesis	501.505	1.29397		350.258	0.86381		3	0.667564	1.01868	1.27025
LOPAC Plate_08	E	3	H0131	(±)-Vanillylmandelic acid	Adrenoceptor		Metabolite		Metabolite of epinephrine	329.054	1.3704		409.115	1.04695		3	0.763973	1.07789	1.27137
LOPAC Plate_15	G	3	S2671	Suramin sodium salt	P2 Receptor		Antagonist	P2X, P2Y	P2X and P2Y receptor antagonist; antiparasitic; anti-tumor agent	214.25	1.18481		269.281	0.927244		3	0.782607	0.931656	1.27173
LOPAC Plate_10	C	8	M4796	(±)-alpha-Methyl-4-carboxyphenylglycine	Glutamate		Antagonist	Metabotropic	Competitive metabotropic glutamate receptor antagonist	358.239	1.20206		333.951	0.730091		3	0.607364	0.945073	1.27193
LOPAC Plate_02	G	2	A7762	L-allylglycine	Biochemistry	Enzyme	Inhibitor	Glutamic acid decarboxylase	Glutamic acid decarboxylase inhibitor	205.254	1.19442		175.932	0.696817		Batch 1	0.583393	0.939034	1.27197
LOPAC Plate_10	B	10	M6383	2-methoxyestradiol	Hormone		Metabolite	Estrogen	Inhibitor of angiogenesis and endothelial cell proliferation	402.766	1.35147		443.244	0.96903		3	0.717018	1.06114	1.27361
LOPAC Plate_11	A	4	M108	(-)-MK-801 hydrogen maleate	Glutamate		Antagonist	NMDA	Less active enantiomer of (+)-MK-801 hydrogen maleate; anticonvulsant; NMDA glutamate receptor antagonist.	501.505	1.35302		409.961	0.909494		3	0.672195	1.06219	1.2738
LOPAC Plate_09	F	11	L9787	L-655,708	Benzodiazepine		Ligand	GABA-A	Selective ligand for the benzodiazepine site of GABA-A receptors which contain the alpha5 subunit	406.814	1.2989		423.015	1.00602		3	0.774519	1.01944	1.27412
LOPAC Plate_14	A	5	R108	Ro 41-0960	Neurotransmission	Enzyme	Inhibitor	COMT	Specific, reversible, orally-active COMT-inhibitor	279.832	1.33333		267.839	0.7929		3	0.594675	1.04545	1.27537
LOPAC Plate_09	D	7	K1136	Ketorolac tris salt	Prostaglandin	Enzyme	Inhibitor	COX	Non-steroidal anti-inflammatory (NSAID) drug	370.383	1.18258		265.147	0.630575		3	0.533221	0.92715	1.2755
LOPAC Plate_16	H	3	I2285	IPA-3	Phosphorylation	Enzyme	Inhibitor	Pak1	allosteric inhibitor of Pak1, binds to autoinhibitory domain of Pak1 (p21 activated kinase)	210.319	1.17582		253.557	0.946813		3	0.805237	0.921625	1.27581
LOPAC Plate_13	E	7	P105	(±)-PPHT hydrochloride	Dopamine		Agonist	D2	Potent D2 dopamine receptor agonist	257.492	1.16967		383.282	1.0744		3	0.918548	0.916112	1.27678
LOPAC Plate_14	F	5	SML0597	Daurisoline	Ion Channels		Modulator		Daurisoline is antiarrythmic, anti-inflammatory, neuron-protective; and blocks hERG channels.	235.858	1.12381		347.791	1.02959		3	0.916157	0.879541	1.27772
LOPAC Plate_14	F	10	T7205	Tegafur	Apoptosis				Tegafur is a pro-drug of 5-fluorouracil, an antimetabolite used as an antineoplastic agent	271.836	1.29524		291.825	0.863906		3	0.666986	1.01319	1.27838
LOPAC Plate_10	C	3	L135	L-741,626	Dopamine		Antagonist	D2	Selective D2 dopamine receptor antagonist	366.335	1.22923		337.999	0.738941		3	0.601141	0.96115	1.27892
LOPAC Plate_10	A	4	M1387	4-Methylpyrazole hydrochloride	Biochemistry	Enzyme	Inhibitor	Alcohol dehydrogenase	Alcohol dehydrogenase inhibitor	406.814	1.36506		423.005	0.924782		3	0.677469	1.06219	1.28513
LOPAC Plate_09	D	2	I3639	Isotharine mesylate	Adrenoceptor		Agonist	beta	beta-Adrenoceptor agonist; bronchodilator	418.958	1.33767		499.925	1.18893		3	0.888806	1.04016	1.28602
LOPAC Plate_15	B	9	PZ0136	CP-100263 dihydrochloride hydrate	Neurotransmission		Antagonist	NK-1	CP-100263 is an NK-1 neurokinin receptor antagonist	218.181	1.20655		269.281	0.927244		3	0.768506	0.937956	1.28637
LOPAC Plate_04	D	3	C3930	Calmidazolium chloride	Intracellular Calcium	Enzyme	Inhibitor	Ca2+ATPase	Potent inhibitor of calmodulin activation of phosphodiesterase; strongly inhibits calmodulin-dependent Ca2+-ATPase	239.28	1.1539		241.393	0.692268		2	0.599936	0.895008	1.28927
LOPAC Plate_09	F	9	L4376	alpha-Lobeline hydrochloride	Cholinergic		Agonist	Nicotinic	Neuronal nicotinic acetylcholine receptor agonist	398.718	1.27305		451.35	1.07341		3	0.843179	0.985829	1.29135
LOPAC Plate_14	B	10	S7389	SB 269970 hydrochloride	Serotonin		Antagonist	5-HT7	Selective 5-HT7 serotonin receptor antagonist	287.827	1.37143		299.82	0.887574		3	0.647189	1.06114	1.29241
LOPAC Plate_02	B	6	P9623	Paroxetine hydrochloride hemihydrate (MW = 374.83)	Serotonin		Inhibitor	Reuptake	Selective serotonin reuptake inhibitor; antidepressant Sold with permission of GlaxoSmithKline. Actual molecular weight = 374.83 to account for 1/2 mole of water.	201.87	1.17473	Possibly	257.131	1.01843		Batch 1	0.866942	0.907424	1.29458
LOPAC Plate_03	C	10	PZ0129	CP-380736	Tyrosine Kinase	Enzyme	Inhibitor	EGFR	CP-380736 is an inhibitor of the epidermal growth factor receptor (EGFR)	128.041	1.12034		195.217	0.738255		2	0.658953	0.864173	1.29644
LOPAC Plate_14	A	10	I5409	IRAK-1/4 Inhibitor I	Phosphorylation	Enzyme	Inhibitor	IRAK-1/4	A novel benzimidazole that is a potent inhibitor of interleukin-1 receptor-associated kinases 1/4 (IRAK 1/4).	287.827	1.37143		315.81	0.934912		3	0.681706	1.05643	1.29817
LOPAC Plate_01	F	4	A0937	(±)-Norepinephrine (+)bitartrate	Adrenoceptor		Agonist		Adrenergic neurotransmitter	227.567	1.10158		272.334	1.43492		Batch 1	1.3026	0.846552	1.30126
LOPAC Plate_13	D	8	G9048	GANT61	Angiogenic Factors		Inhibitor	SF-1	GANT61 blocks hedgehog pathway signaling by inhibiting the transcripional activity of G	281.079	1.27682		343.971	0.964207		3	0.755164	0.980839	1.30176
LOPAC Plate_12	E	2	SML0630	JW55	Gene Regulation	Enzyme	Inhibitor	TNKS1/2	JW55 is a potent and selective inhibitor of Wnt/ß-catenin signaling.	529.367	1.36586		314.436	0.775466		3	0.567749	1.04844	1.30275
LOPAC Plate_12	G	6	P0667	Parthenolide	Serotonin		Inhibitor		Inhibits serotonin release from platelets; inhibits production of leukotriene B4 and thromboxane B2	497.525	1.2837		366.178	0.903074		3	0.703491	0.985245	1.30293
LOPAC Plate_08	G	5	SML0191	Valganciclovir hydrochloride hydrate	Antiviral	Enzyme	Inhibitor	DNA Polymerase	Valganciclovir hydrochloride hydrate is an antiviral used to treat cytomegalovirus infection	289.032	1.20372		329.071	0.842108		3	0.699589	0.92311	1.30398
LOPAC Plate_11	C	7	N2034	CR 2249	Glutamate		Agonist	NMDA-Glycine	Facilitates glycine action at NMDA glutamate receptors	453.743	1.22416		394.04	0.874173		3	0.7141	0.936399	1.30731
LOPAC Plate_13	C	4	PZ0113	PD173952	Kinase	Enzyme	Inhibitor	Src	PD173952 is a Src family kinase inhibitor.	273.216	1.2411		316.454	0.88707		3	0.714743	0.949178	1.30756
LOPAC Plate_14	E	9	S4250	D-Serine	Glutamate		Agonist	NMDA-Glycine	Glycine mimic active at the strychnine-insensitive glycine binding site associated with the NMDA glutamate receptor as well as the inhibitory post-synaptic glycine receptor	283.829	1.35238		287.827	0.852072		3	0.630053	1.02718	1.3166
LOPAC Plate_16	A	11	Y3125	Yohimbine hydrochloride	Adrenoceptor		Antagonist	alpha2	alpha2 Adrenoceptor antagonist isolated from Cortnanthe johimbe	277.148	1.54944		324.316	1.21104		3	0.7816	1.17512	1.31853
LOPAC Plate_15	D	8	T4376	N-p-Tosyl-L-phenylalanine chloromethyl ketone	Biochemistry	Enzyme	Inhibitor	Chymotrypsin alpha	Blocks LPS- or cytokine-induced activation of nuclear factor kB (NFkB), which, blocks the induction of iNOS and COX-2 transcription; blocks activation of pp70s6k by all mitogens	233.905	1.29351		265.35	0.913708		3	0.706378	0.980839	1.31878
LOPAC Plate_15	F	7	T3757	TTNPB	Transcription		Ligand	RAR-alpha, beta, gamma	Selective and highly potent retinoic acid analog with affinity for retinoic acid receptors (RAR) alpha, beta, and gamma	218.181	1.20655		222.108	0.764808		3	0.633878	0.914334	1.3196
LOPAC Plate_15	E	11	P0122	Pifithrin-mu	Apoptosis		Inhibitor	p53 binding	Anti-apoptotic; inhibits p53 binding to mitochodria as well as Bcl-xL and Bcl-2 proteins. Does not affect transcriptional functions of p53.	241.768	1.33699		285.005	0.98139		3	0.73403	1.01263	1.32032
LOPAC Plate_11	B	2	M8131	L-alpha-Methyl-p-tyrosine	Neurotransmission	Enzyme	Inhibitor	Tyrosine hydroxylase	Tyrosine hydroxylase inhibitor	461.703	1.24564		322.396	0.715233		3	0.57419	0.943127	1.32075
LOPAC Plate_02	D	6	A9950	Aniracetam	Glutamate		Agonist	AMPA	Increases ion conductance through AMPA glutamate receptors; reported to display anti-amnesic acitivty	168.037	0.977851		148.865	0.589615		Batch 1	0.60297	0.73977	1.32183
LOPAC Plate_15	C	9	O1141	Olanzapine	Dopaminergics		Antagonists	5-HT2, D1/D2	Olanzapine is a 5-HT2 serotonin and D1/D2 dopamine receptor antagonist	249.63	1.38047		292.868	1.00846		3	0.730523	1.04357	1.32283
LOPAC Plate_03	C	5	B7880	8-Bromo-cAMP sodium	Cyclic Nucleotides	Enzyme	Activator		Membrane-permeable analog of cAMP	120.943	1.05823		195.217	0.738255		2	0.697631	0.799787	1.32314
LOPAC Plate_15	C	3	D9571	Dolasetron mesylate hydrate	Serotonergics		Antagonist	5-HT3	Dolasetron mesylate hydrate is a highly specific and selective serotonin 5-HT3 receptor antagonist,	229.974	1.27177		292.868	1.00846		3	0.792959	0.96115	1.32318
LOPAC Plate_02	F	7	A140	Arecaidine propargyl ester hydrobromide	Cholinergic		Agonist	M2	Potent muscarinic acetylcholine receptor agonist exhibiting a slight selectivity for M2 receptors	198.487	1.15505		189.465	0.750419		Batch 1	0.649688	0.871111	1.32594
LOPAC Plate_14	G	11	S8442	SU 5416	Phosphorylation		Inhibitor	VEGFR PTK	Potent and selective VEGFR PTK inhibitor; inhibits VEGF-induced angiogenesis	275.834	1.31429		335.798	0.994083		3	0.756367	0.988289	1.32986
LOPAC Plate_01	E	12	n/a (no compound empty)	n/a (no compound empty)						283.526	1.37246	Edge effect	197.722	1.04179		Batch 1	0.759069	1.03135	1.33074
LOPAC Plate_11	C	2	PZ0213	PF-04418948	Lipid Signaling		Antagonist	PGE2	PF-04418948 is a PGE2 Receptor (EP2) specific antagonist.	465.683	1.25638		358.218	0.794703		3	0.632536	0.943888	1.33106
LOPAC Plate_09	B	7	K0250	Kainic acid	Glutamate		Agonist	Kainate	Excitatory amino acid receptor agonist selective for the kainate glutamate receptor subtype; conformationally restricted analog of L-glutamic acid	406.814	1.2989		265.147	0.630575		3	0.48547	0.974902	1.33233
LOPAC Plate_09	G	9	L4762	Loperamide hydrochloride	Opioid		Ligand		Meperidine congener which binds to opioid receptors; Ca2+ channel antagonist	374.431	1.1955		309.674	0.736469		3	0.616034	0.89631	1.3338
LOPAC Plate_11	G	3	M105	Methoctramine tetrahydrochloride	Cholinergic		Antagonist	M2	Selective M2 muscarinic acetylcholine receptor antagonist	461.703	1.24564		394.04	0.874173		3	0.701788	0.931656	1.33702
LOPAC Plate_13	F	7	B5063	BMS-193885	Neurotransmission		Antagonist	Y1	BMS-193885 is a potent, selective Y1 antagonist that is active in both acute and chronic animal models of food intake	269.285	1.22325		355.764	0.997266		3	0.815262	0.914334	1.33786
LOPAC Plate_09	E	9	L3791	Lamotrigine	Anticonvulsant				Anticonvulsant	431.101	1.37644		394.679	0.938631		3	0.681926	1.02718	1.34002
LOPAC Plate_03	A	4	B5399	(±)-Baclofen	GABA		Agonist	GABA-B	GABA-B receptor agonist; antispastic agent; muscle relaxant	149.338	1.30669		269.754	1.02013		2	0.780704	0.973718	1.34196
LOPAC Plate_08	F	1	n/a (no compound empty)	n/a (no compound empty)						315.713	1.31484		320.16	0.819306		3	0.623124	0.979213	1.34275
LOPAC Plate_16	H	2	T7883	Trimethoprim	Antibiotic	Enzyme	Inhibitor	Dihydrofolate reductase	Potent inhibitor of bacterial and protozoal dihydrofolate reductase	249.63	1.39559		304.661	1.13764		3	0.815168	1.03784	1.34471
LOPAC Plate_15	H	7	T4143	Triamterene	Na+ Channel		Blocker		Na+ channel blocker; diuretic	226.043	1.25003		304.661	1.04907		3	0.839236	0.929534	1.34479
LOPAC Plate_11	A	5	M149	Methiothepin mesylate	Serotonin		Antagonist	5-HT1E, 5-HT1F, 5-HT6	5-HT1 Serotonin receptor antagonist; blocks serotonin autoreceptors	521.406	1.40671		378.119	0.838853		3	0.596322	1.04545	1.34556
LOPAC Plate_09	D	8	L0664	loxoprofen	Prostaglandin	Enzyme	Inhibitor	COX	Non-steroidal anti-inflammatory (NSAID) drug; analgesic	414.91	1.32474		313.721	0.746096		3	0.5632	0.980839	1.35062
LOPAC Plate_15	G	11	A7606	Aprindine hydrochloride	K+ Channel		Blocker	hERG	Class Ib antiarrhythmic and hERG channel blocker.	241.768	1.33699		292.868	1.00846		3	0.754279	0.988289	1.35283
LOPAC Plate_03	E	10	C1172	ML-9	Phosphorylation	Enzyme	Inhibitor	MLCK	Myosin light chain kinase (MLCK) inhibitor	138.69	1.21352		195.217	0.738255		2	0.608361	0.896203	1.35406
LOPAC Plate_03	C	6	S7701	Sorbinil	Antioxidants and Cytoprotectants	Enzyme	Inhibitor	AR	Sorbinil is an inhibitor of Aldose Reductase (AR)	113.844	0.996118		188.118	0.711409		2	0.714182	0.735625	1.35411
LOPAC Plate_11	G	2	M9292	Memantine hydrochloride	Glutamate		Antagonist	NMDA	Antagonist of NMDA glutamate receptors; stimulates dopamine release	473.644	1.27785		421.901	0.935984		3	0.732466	0.94356	1.35429
LOPAC Plate_02	H	4	A9345	N-(4-Amino-2-chlorophenyl)phthalimide	Anticonvulsant				Potent anticonvulsant	252.62	1.47006		338.33	1.34003		Batch 1	0.911552	1.0854	1.35439
LOPAC Plate_09	B	9	L2536	LY-310,762 hydrochloride	Serotonin		Antagonist	5-HT1D	Potent, selective 5-HT 1D serotonin receptor antagonist.	398.718	1.27305		317.769	0.755723		3	0.593633	0.937956	1.35726
LOPAC Plate_06	F	11	E2375	Emetine dihydrochloride hydrate	Apoptosis		Activator		Apoptosis inducer; RNA-Protein translation inhibitor	394.363	1.32518		545.227	1.648		2	1.2436	0.97573	1.35814
LOPAC Plate_04	F	12	n/a (no compound empty)	n/a (no compound empty)						298.483	1.43941		367.2	1.05306		2	0.731592	1.05892	1.35931
LOPAC Plate_09	E	6	A0606	Aurothioglucose	Phosphorylation	Enzyme	Inhibitor	rac1	Potent PKC iota - Par6 interaction inhibitor; Disrupts a rac1 signaling pathway required for growth of a cancer cell line.	459.437	1.46691		398.727	0.948258		3	0.646432	1.07884	1.35972
LOPAC Plate_15	G	7	SML0824	Lubeluzole dihydrochloride	Glutamate		Antagonist	NMDA	Lubeluzole is an NMDA glutamate receptor antagonist.	202.457	1.1196		214.246	0.737735		3	0.658929	0.82256	1.36111
LOPAC Plate_11	C	6	M226	p-MPPF dihydrochloride	Serotonin		Antagonist	5-HT1A	Selective 5-HT1A serotonin receptor antagonist	493.545	1.33154		370.159	0.821193		3	0.616723	0.977727	1.36188
LOPAC Plate_08	C	7	H8502	Dopamine hydrochloride	Dopamine		Agonist		Endogenous neurotransmitter	306.82	1.2778		440.243	1.1266		3	0.881677	0.936399	1.36459
LOPAC Plate_14	D	6	D5446	7,8-Dihydroxyflavone hydrate	Cytokines, Growth Factors and Hormones		Agonist	TrkB	Selective TrkB receptor agonist	271.836	1.29524		307.815	0.911243		3	0.703533	0.946967	1.36778
LOPAC Plate_15	C	8	K4144	KB-R7493	Calcium Channel		Inhibitor	NCX	KB-R7943 inhibits the reversed Na(+)/Ca(2+) exchanger, NCX. In cardiomyocytes	233.905	1.29351		265.35	0.913708		3	0.706378	0.945073	1.36869
LOPAC Plate_15	B	2	S8688	SR 59230A oxalate	Adrenoceptor		Antagonist	beta3	beta3-Adrenoceptor antagonist	233.905	1.29351		257.488	0.886635		3	0.685449	0.943127	1.37151
LOPAC Plate_10	C	9	M5441	Mibefradil dihydrochloride	Ca2+ Channel		Blocker	T-type	T-type Ca2+ channel blocker	427.053	1.43297		410.861	0.898234		3	0.626834	1.04357	1.37314
LOPAC Plate_16	C	4	T9778	Tropicamide	Cholinergic		Antagonist	M4	M4 muscarinic acetylcholine receptor antagonist	233.905	1.30768		277.143	1.03489		3	0.79139	0.949178	1.3777
LOPAC Plate_09	D	10	L5783	Lidocaine N-ethyl bromide quaternary salt	Na+ Channel		Antagonist		Quaternary lidocaine derivative which blocks both fast, Na+-dependent action potentials and voltage-dependent, non-inactivating Na+ conductance	459.437	1.46691		325.865	0.774976		3	0.528305	1.05913	1.38502
LOPAC Plate_12	H	9	P4532	R(-)-N6-(2-Phenylisopropyl)adenosine	Adenosine		Agonist	A1	A1 Adenosine receptor agonist	549.268	1.41721		358.218	0.883442		3	0.623367	1.02216	1.38649
LOPAC Plate_10	C	11	M7033	NG-Monomethyl-L-arginine acetate	Nitric Oxide	Enzyme	Inhibitor	NOS	Nitric oxide synthase inhibitor; blocks formation of endothelium-derived relaxing factor (EDRF)	439.197	1.47372		366.334	0.800888		3	0.543447	1.06285	1.38657
LOPAC Plate_03	E	7	B134	BMY 7378 dihydrochloride	Serotonin		Agonist	5-HT1A	Partial 5-HT1A serotonin receptor agonist; alpha1D adrenoceptor antagonist	120.943	1.05823		212.964	0.805369		2	0.761052	0.763061	1.38682
LOPAC Plate_16	A	9	V8879	Vincristine sulfate	Cytoskeleton and ECM		Inhibitor	Tubulin	Inhibitor of microtubule assembly	285.01	1.59339		253.557	0.946813		3	0.594213	1.14831	1.38759
LOPAC Plate_09	B	8	U6881	U-73343	G-protein			PLC	Inactive analog of U73122 (Rack 16, Well D06)	418.958	1.33767		350.152	0.832737		3	0.622529	0.963558	1.38826
LOPAC Plate_15	A	6	T1516	Trihexyphenidyl hydrochloride	Cholinergic		Antagonist	Muscarinic	Muscarinic acetylcholine receptor antagonist; centrally acting anticholinergic	277.148	1.53264		257.488	0.886635		3	0.578501	1.10308	1.38942
LOPAC Plate_14	E	11	I7160	IMS2186	Cell Cycle		Inhibition	G2	IMS2186 is an anti-proliferative and anti-angiogenic. The proposed mechanism action, under investigation, is blocking the cell cycle at G2 and inhibition of the production of PGE2/TNF-a.	295.822	1.40952		291.825	0.863906		3	0.612906	1.01263	1.39195
LOPAC Plate_11	A	3	M9511	Minocycline hydrochloride	Cell Cycle	Enzyme	Inhibitor		Basement membrane protease inhibitor; inhibits endothelial cell proliferation and angiogenesis.	553.248	1.49262		290.555	0.644593		3	0.431854	1.07132	1.39325
LOPAC Plate_01	B	11	SML0505	Tienilic acid	Multidrug Resistance	Enzyme	Inhibitor	P450	P450 inhibitor, a specific suicide substrate for CYP2C9 and CYP2C10; hepatotoxic	257.411	1.24605		179.069	0.94351		Batch 1	0.757201	0.893464	1.39463
LOPAC Plate_02	H	7	A143	S(-)-Atenolol	Adrenoceptor		Antagonist	beta1	beta1 adrenoceptor antagonist	266.153	1.54881		236.831	0.938023		Batch 1	0.605641	1.11053	1.39465
LOPAC Plate_02	E	10	A255	A-77636 hydrochloride	Dopamine		Agonist	D1	Potent, orally active D1 dopamine receptor agonist	215.403	1.25349		301.114	1.19263		Batch 1	0.95145	0.896203	1.39866
LOPAC Plate_10	A	11	M6690	MDL 28170	Cell Cycle	Enzyme	Inhibitor	Calpain I / II	Cell permeable calpain I and II inhibitor	491.82	1.65029		362.286	0.792038		3	0.479938	1.17512	1.40436
LOPAC Plate_01	H	12	n/a (no compound empty)	n/a (no compound empty)						346.946	1.67946		223.836	1.17939		Batch 1	0.702243	1.1957	1.40458
LOPAC Plate_02	G	7	SML0536	Efavirenz	Gene Regulation	Enzyme	Inhibitor	Reverse transcriptase	Non-nucleoside reverse transcriptase inhibitor (NNRTI).	222.17	1.29286	Possibly	202.998	0.80402		Batch 1	0.621891	0.917874	1.40854
LOPAC Plate_15	E	7	SML0777	Oltipraz metabolite M2	Lipid Signaling	Enzyme	Inhibitor	LXRa	Oltipraz metabolite M2 acts as a potent inhibitor of LXRa transcriptional activity, and also AMPK activator inducing the phosphorylation of AMPK.	233.905	1.29351		269.281	0.927244		3	0.716843	0.916112	1.41196
LOPAC Plate_09	C	11	R0529	Ro 90-7501	Neurodegeneration		Inhibitor	amyloid beta42 fibril formation	Inhibits amyloid beta42 (Abeta42) fibril formation.	471.58	1.50568		390.632	0.929004		3	0.616998	1.06285	1.41665
LOPAC Plate_16	D	4	T101	THIP hydrochloride	GABA		Agonist	GABA-A	GABA-A receptor agonist, with some GABA-C receptor agonist activity	249.63	1.39559		265.35	0.990851		3	0.709985	0.984444	1.41765
LOPAC Plate_15	G	9	T5515	Thio-NADP sodium	Intracellular Calcium		Blocker	NAADP-induced	Blocks nicotinate adenine dinucleotide phosphate (NAADP)-induced Ca2+ release	229.974	1.27177		253.557	0.873099		3	0.686522	0.89631	1.4189
LOPAC Plate_03	E	5	B8279	Ro 20-1724	Cyclic Nucleotides	Enzyme	Inhibitor	cAMP phosphodiesterase	Potent and selective cAMP phosphodiesterase inhibitor	131.591	1.1514		230.711	0.872483		2	0.757757	0.811428	1.41898
LOPAC Plate_16	F	6	U7500	4-Imidazoleacrylic acid	Histamine	Enzyme	Inhibitor	Histidine ammonia-lyase/ decarboxylase	Histidine ammonia-lyase and decarboxylase inhibitor	229.974	1.28571		269.281	1.00553		3	0.782084	0.905265	1.42025
LOPAC Plate_09	B	11	N0287	NNC 55-0396	Ca2+ Channel		Inhibitor	T-type	Selective T-type calcium channel inhibitor.	479.676	1.53153		487.781	1.16005		3	0.757442	1.07452	1.42532
LOPAC Plate_04	G	12	n/a (no compound empty)	n/a (no compound empty)						316.984	1.52862		274.695	0.787771		2	0.515346	1.07229	1.42557
LOPAC Plate_04	H	12	n/a (no compound empty)	n/a (no compound empty)						353.986	1.70706		400.502	1.14856		2	0.672828	1.1957	1.42767
LOPAC Plate_09	B	10	SML0653	Capecitabine	Gene Regulation				Capecitabine is an anti-cancer drug, a prodrug of doxifluridine, metabolized to 5-fluorouracil at the tumor site.	475.628	1.51861		325.865	0.774976		3	0.51032	1.06114	1.43111
LOPAC Plate_10	B	11	M6760	Myricetin	Phosphorylation	Enzyme	Inhibitor	Casein Kinase II	Casein Kinase II inhibitor	459.437	1.54163		475.627	1.03983		3	0.674498	1.07452	1.43472
LOPAC Plate_03	G	10	C1290	Chlorpropamide	Hormone		Releaser	Insulin	Stimulates insulin release	149.338	1.30669		230.711	0.872483		2	0.667707	0.910343	1.43538
LOPAC Plate_07	B	12	n/a (no compound empty)	n/a (no compound empty)						279.629	1.53972		196.743	0.82903		2	0.538428	1.07183	1.43654
LOPAC Plate_09	A	10	L5025	Leflunomide	Immune System	Enzyme	Inhibitor		Immunosuppressive; its metabolite, a malononitrile derivative, inhibits dihydroorotate dehydrogenase (in the de novo pyrimidine synthesis pathway) and several protein tyrosine kinases	475.628	1.51861		293.482	0.697962		3	0.459606	1.05643	1.43749
LOPAC Plate_09	E	8	L1011	Labetalol hydrochloride	Adrenoceptor		Antagonist	beta	Competitive beta-adrenoceptor antagonist	447.293	1.42814		439.206	1.04453		3	0.73139	0.993333	1.43772
LOPAC Plate_15	H	8	T4512	(±)-Taxifolin	Cell Stress		Inhibitor	Antioxidant	Flavonoid, antioxidant	237.837	1.31525		277.143	0.954317		3	0.725579	0.913333	1.44005
LOPAC Plate_12	D	2	N153	Nylidrin hydrochloride	Adrenoceptor		Agonist	beta	beta Adrenoceptor agonist; peripheral vasodilator	581.109	1.49937		386.079	0.952154		3	0.635038	1.04016	1.44148
LOPAC Plate_01	B	10	T9034	Sodium Taurocholate hydrate	Multi-Drug Resistance		Modulator	Conjugate Pathway	Multi-drug resistance conjugate pathway modulator.	294.717	1.42664		235.028	1.23836		Batch 1	0.868026	0.986993	1.44544
LOPAC Plate_08	H	11	I2760	R(-)-Isoproterenol (+)-bitartrate	Adrenoceptor		Agonist	beta	Sympathomimetic amine acting almost exclusively on beta adrenoceptors; bronchodilator; active enantiomer of Isoproterenol	404.651	1.68523		604.778	1.54766		3	0.918365	1.16212	1.45014
LOPAC Plate_07	A	12	n/a (no compound empty)	n/a (no compound empty)						309.138	1.70221		222.036	0.935609		2	0.549645	1.17356	1.45047
LOPAC Plate_11	A	6	SML0221	Piperlongumine	Apoptosis		inhibitor	GSTP1	Piperlongumine selectively kills cancer cells regardless of p53 status without harming normal cells. It binds to and inihbits proteins known to regulate oxidative stress	593.05	1.6		374.139	0.830023		3	0.518764	1.10308	1.45049
LOPAC Plate_15	G	10	T6394	S(-)-Timolol maleate	Adrenoceptor		Antagonist	beta	beta Adrenoceptor antagonist; antihypertensive; antiarrhythmic; antiglaucoma agent	261.423	1.44568		308.592	1.06261		3	0.735021	0.991884	1.45751
LOPAC Plate_15	B	3	S009	PAPP	Serotonin		Agonist	5-HT1A	Selective 5-HT1A serotonin receptor agonist	253.561	1.40221		237.832	0.818953		3	0.584046	0.960408	1.46001
LOPAC Plate_10	A	8	M4531	Meclofenamic acid sodium	Prostaglandin	Enzyme	Inhibitor	COX / 5-Lipoxygenase	Cyclooxygenase and 5-Lipoxygenase inhibitor	459.437	1.54163		443.244	0.96903		3	0.628575	1.05534	1.46079
LOPAC Plate_15	C	2	SML0275	rac BHFF	Neurotransmission		modulator	GABA-B	rac BHFF is an orally active, potent and selective positive allosteric modulator of GABA-B	249.63	1.38047		285.005	0.98139		3	0.710911	0.943888	1.46253
LOPAC Plate_14	A	6	R140	Ro 04-6790 dihydrochloride	Serotonin		Antagonist	5-HT6	Selective 5-HT6 serotonin receptor antagonist.	339.796	1.61905		347.791	1.02959		3	0.635921	1.10308	1.46775
LOPAC Plate_03	B	7	PZ0171	CP-100356 monohydrochloride	Cell Signaling		Inhibitor	MDR1 (P-Gp)	CP-100356 is a specific inhibitor of MDR1 (P-Gp), the protypical ABC transporter. CP-100356 also inhibits prazosin transport in human breast cancer resistance protein (BCRP)-transfected MDCKII cells	145.788	1.27563		141.976	0.536913		2	0.4209	0.864772	1.4751
LOPAC Plate_03	H	10	C1610	1-(4-Chlorobenzyl)-5-methoxy-2-methylindole-3-acetic acid	Multi-Drug Resistance		Inhibitor	MRP1	NSAID; putative inhibitor of multidrug resistance-associated protein 1 (MRP1)	181.282	1.5862		234.26	0.885906		2	0.55851	1.07252	1.47894
LOPAC Plate_11	D	7	N2255	S-(4-Nitrobenzyl)-6-thioinosine	Adenosine		Inhibitor	Uptake	Potent adenosine uptake inhibitor	509.466	1.3745		366.178	0.812363		3	0.591026	0.92715	1.4825
LOPAC Plate_03	A	6	B9308	BP 897	Dopamine		Agonist	D3	Partially selective D3 dopamine receptor agonist	159.986	1.39986		241.359	0.912752		2	0.652033	0.943797	1.48322
LOPAC Plate_11	E	12	n/a (no compound empty)	n/a (no compound empty)						565.188	1.52483		449.763	0.997794		3	0.654363	1.02608	1.48608
LOPAC Plate_08	F	3	H0627	6-Hydroxymelatonin	Melatonin		Metabolite		Melatonin metabolite with agonist activity	351.289	1.46299		386.88	0.990046		3	0.676726	0.981998	1.48981
LOPAC Plate_06	F	12	n/a (no compound empty)	n/a (no compound empty)						469.795	1.57865		338.782	1.024		2	0.648654	1.05892	1.49081
LOPAC Plate_15	C	7	T2896	Triflupromazine hydrochloride	Dopamine		Antagonist	D2	D2 dopamine receptor antagonist; phenothiazine antipsychotic	253.561	1.40221		304.661	1.04907		3	0.748158	0.936399	1.49745
LOPAC Plate_11	B	12	n/a (no compound empty)	n/a (no compound empty)						537.327	1.44966		402	0.891834		3	0.6152	0.968028	1.49754
LOPAC Plate_07	D	5	PZ0012	Sunitinib malate	Tyrosine Kinase	Enzyme	Inhibitor		Sunitinib malate is a receptor tyrosine kinase inhibitor, which targets VEGF-R1, VEGF-R2, VEGF-R3, PDGF-Ra, PDGF-Rß, KIT, FLT3, CSF-1R, and RET. Sunitinib malate is an anticancer drug.	250.12	1.37724		340.07	1.43298		2	1.04047	0.919107	1.49845
LOPAC Plate_07	A	10	SML0666	GSK1210151A	Gene Regulation	Enzyme	Inhibitor	BET	Inhibitor of the BET (bromodomain and extra terminal domain protein) family of acetyl-lysine recognizing, chromatin 'adaptor' proteins.	275.413	1.51651		188.312	0.793504		2	0.523243	1.00949	1.50226
LOPAC Plate_03	A	5	B7651	Brefeldin A from Penicillium brefeldianum	Cytoskeleton and ECM		Inhibitor	Golgi apparatus	Fungal metabolite that disrupts the structure and function of the Golgi apparatus	174.184	1.52408		244.909	0.926174		2	0.607693	1.01206	1.50593
LOPAC Plate_05	C	2	C9911	(S)-(+)-Camptothecin	Apoptosis	Enzyme	Inhibitor	TopoI	DNA topoisomerase I inhibitor	161.882	1.3661		159.832	1.05291		2	0.770747	0.906539	1.50693
LOPAC Plate_04	B	12	n/a (no compound empty)	n/a (no compound empty)						335.485	1.61784		344.999	0.989389		2	0.611548	1.07183	1.50942
LOPAC Plate_15	D	7	T3146	Trimipramine maleate	Serotonin		Inhibitor	Reuptake	Serotonin reuptake inhibitor that also blocks norepinephrine reuptake; antidepressant	253.561	1.40221		296.799	1.022		3	0.72885	0.92715	1.51238
LOPAC Plate_09	A	9	L2411	LY-367,265	Serotonin		Antagonist	Reuptake	Inhibits serotonin reuptake; 5-HT2A serotonin receptor antagonist	544.443	1.73832		317.769	0.755723		3	0.434743	1.14831	1.51381
LOPAC Plate_06	D	5	D9190	DCEBIO	K+ Channel		Activator	hlK1	Increases epithelial chloride secretion through the synergistic activation of a basolateral membrane-located K+ channel (hlK1) and an apical membrane Cl- conductance	414.214	1.39188		326.872	0.988		2	0.709829	0.919107	1.51439
LOPAC Plate_04	A	12	n/a (no compound empty)	n/a (no compound empty)						368.787	1.77844		389.401	1.11673		2	0.627925	1.17356	1.51543
LOPAC Plate_14	E	6	S0752	(±)-Synephrine	Adrenoceptor		Agonist	alpha	alpha-Adrenoceptor agonist; vasoconstrictor	343.793	1.6381		403.758	1.19527		3	0.729668	1.07884	1.51839
LOPAC Plate_07	F	12	n/a (no compound empty)	n/a (no compound empty)						292.276	1.60936		247.329	1.04219		2	0.64758	1.05892	1.5198
LOPAC Plate_15	E	6	T2057	Trequinsin hydrochloride	Cyclic Nucleotides	Enzyme	Inhibitor	PDE III	Phosphodiesterase III (PDE III) inhibitor	296.803	1.64134		422.594	1.45516		3	0.886571	1.07884	1.5214
LOPAC Plate_02	H	2	A6476	ABT-418 hydrochloride	Cholinergic		Agonist	nicotinic	Neuronal nicotinic acetylcholine receptor agonist with cognition enhancing and anxiolytic activities	303.369	1.76538		230.064	0.911223		Batch 1	0.516162	1.15899	1.5232
LOPAC Plate_08	F	2	J4829	JFD00244	Gene Regulation	Enzyme	Inhibitor	SIRT	A SIRT (sirtuin, human silent information regulator) inhibitor.	377.97	1.57411		440.243	1.1266		3	0.715707	1.03158	1.52593
LOPAC Plate_10	H	10	E4660	Eupatorin	Cell Cycle			CYP1A- family	Eupatorin acts as an antiproliferative in cells expressing the CYP1A- family. It induces G2/M block follow by apoptosis in cells expressing the CYP1A- family	463.485	1.55521		447.292	0.97788		3	0.628776	1.01868	1.5267
LOPAC Plate_15	B	7	T2879	4-Hydroxyphenethylamine hydrochloride	Dopamine		Agonist		Dopamine receptor agonist	269.285	1.48916		249.626	0.859562		3	0.577212	0.974902	1.5275
LOPAC Plate_08	E	5	L4408	Lithium Chloride	Neurotransmission	Enzyme	Inhibitor	Inositol monophosphatase	Anti-manic drug used in the treatment of bipolar depression; inhibitor of inositol monophosphatase	342.395	1.42596		369.093	0.944527		3	0.662382	0.930035	1.53323
LOPAC Plate_07	D	12	n/a (no compound empty)	n/a (no compound empty)						279.629	1.53972		243.114	1.02443		2	0.665331	1.0042	1.53328
LOPAC Plate_15	F	8	C0996	cDPCP	Cell Cycle			DNA-N7 of guanosine	cDPCP is a tumor cell permeable, potent platinum-based antineoplastic agent.	241.768	1.33699		265.35	0.913708		3	0.683407	0.871692	1.53379
LOPAC Plate_02	E	7	A138	Aminobenztropine	Cholinergic		Ligand	Muscarinic	High affinity muscarinic acetylcholine receptor ligand	201.87	1.17473		159.015	0.629816	Pipette damage	Batch 1	0.536135	0.763061	1.5395
LOPAC Plate_03	A	10	C0862	CGP-7930	GABA		Modulator	GABA-B	Positive allosteric modulator of GABA-B receptors	177.733	1.55514		269.754	1.02013		2	0.655976	1.00949	1.54053
LOPAC Plate_11	F	12	n/a (no compound empty)	n/a (no compound empty)						577.129	1.55705		485.584	1.07726		3	0.691863	1.00728	1.54579
LOPAC Plate_15	C	10	T6050	Tulobuterol hydrochloride	Adrenoceptor		Agonist	beta	beta-Adrenoceptor agonist related to structurally to terbutaline; bronchodilator	312.527	1.72829		513.009	1.7665		3	1.02211	1.11607	1.54856
LOPAC Plate_15	A	5	T0410	Tiapride hydrochloride	Dopamine		Antagonist	D2/D3	D2 and D3 dopamine receptor antagonist; antipsychotic	292.872	1.6196		277.143	0.954317		3	0.589231	1.04545	1.54919
LOPAC Plate_11	D	12	n/a (no compound empty)	n/a (no compound empty)						604.99	1.63222		457.723	1.01545		3	0.622132	1.05198	1.55157
LOPAC Plate_02	H	10	B0385	Beclomethasone	Hormone			Glucocorticoid	Anti-inflammatory glucocorticoid	286.453	1.66694		233.448	0.924623		Batch 1	0.554683	1.07252	1.55423
LOPAC Plate_12	H	6	P0778	Pindolol	Adrenoceptor		Antagonist	beta	Nonselective beta adrenoceptor antagonist; vasodilator	608.971	1.57125		402	0.991418		3	0.630973	1.00748	1.55959
LOPAC Plate_03	F	10	C1251	(+)-Catechin Hydrate	Cell Stress		Inhibitor	Antioxidant	Antioxidant; free radical scavenger	152.887	1.33774		252.007	0.95302		2	0.712409	0.85721	1.56058
LOPAC Plate_15	A	2	S8567	SU 4312	Phosphorylation	Enzyme	Inhibitor	KDR	Vascular endothelial growth factor (VEGF) receptor protein tyrosine kinase 1/2 (KDR) and platelet derived growth factor (PDGF) receptor inhibitor	320.39	1.77177		269.281	0.927244		3	0.523343	1.13449	1.56174
LOPAC Plate_16	A	6	U4125	Uridine 5'-diphosphate sodium	P2 Receptor		Agonist	P2Y	P2Y receptor agonist	308.596	1.72526		269.281	1.00553		3	0.58283	1.10308	1.56404
LOPAC Plate_15	E	8	T4425	(6R)-5,6,7,8-Tetrahydro-L-biopterin hydrochloride	Neurotransmission	Enzyme	Cofactor	Tyrosine & tryptophan hydroxylase, NOS	Cofactor for tyrosine hydroxylase, tryptophan hydroxylase and nitric oxide synthase	281.079	1.55438		277.143	0.954317		3	0.613953	0.993333	1.56481
LOPAC Plate_10	G	10	M6628	O-Methylserotonin hydrochloride	Serotonin		Agonist		Nonselective serotonin receptor agonist that lacks affinity for the 5-HT3 receptor	463.485	1.55521		423.005	0.924782		3	0.594634	0.991884	1.56794
LOPAC Plate_08	F	4	H2138	Hexamethonium dichloride	Cholinergic		Antagonist	Nicotinic	Nicotinic acetylcholine receptor antagonist	346.842	1.44447		364.646	0.933147		3	0.646011	0.921165	1.5681
LOPAC Plate_04	E	12	n/a (no compound empty)	n/a (no compound empty)						335.485	1.61784		356.099	1.02122		2	0.631225	1.03135	1.56867
LOPAC Plate_09	A	8	K3888	Kenpaullone	Phosphorylation	Enzyme	Inhibitor	CDK1, CDK2, CDK5	Potent inhibitor of CDK1/cyclin B, CDK2/cyclin A, CDK2/cyclin E, and CDK5/p25	520.155	1.66078		362.296	0.861617		3	0.518804	1.05534	1.57369
LOPAC Plate_09	D	9	L2906	Lomefloxacin hydrochloride	Antibiotic	Enzyme	Inhibitor	DNA Gyrase	DNA gyrase inhibitor	503.964	1.60908		301.578	0.717216		3	0.445731	1.02193	1.57456
LOPAC Plate_14	B	6	S0278	(±)-Sotalol hydrochloride	Adrenoceptor		Antagonist	beta	Potent beta-adrenoceptor antagonist, a class III antiarrythmic; prolongs the action potential and increases the refractory period	339.796	1.61905		307.815	0.911243		3	0.562826	1.02818	1.57467
LOPAC Plate_04	D	12	n/a (no compound empty)	n/a (no compound empty)						328.084	1.58216		330.198	0.946943		2	0.598514	1.0042	1.57554
LOPAC Plate_09	C	10	L5647	Lidocaine hydrochloride	Na+ Channel		Modulator		Anti-arrhythmic; local anesthetic	552.538	1.76417		325.865	0.774976		3	0.439286	1.11607	1.5807
LOPAC Plate_05	C	10	P152	S(-)-Pindolol	Adrenergic		Antagonist	beta	Beta adrenergic receptor antagonist; vasodilator. Non-selective 5-HT1 serotonin receptor ligand.	161.882	1.3661		190.569	1.2554		2	0.918968	0.864173	1.58081
LOPAC Plate_15	G	8	T4500	Theobromine	Adenosine		Antagonist	A1 > A2	Weak adenosine receptor antagonist; weak phosphodiesterase inhibitor; diuretic; smooth muscle relaxant	265.354	1.46742		277.143	0.954317		3	0.650335	0.927628	1.58191
LOPAC Plate_01	A	12	n/a (no compound empty)	n/a (no compound empty)						384.252	1.86005		205.183	1.08111		Batch 1	0.581225	1.17356	1.58496
LOPAC Plate_01	F	12	n/a (no compound empty)	n/a (no compound empty)						346.946	1.67946	Edge effect	182.799	0.963167		Batch 1	0.573498	1.05892	1.586
LOPAC Plate_05	F	3	C125	(±)-CGP-12177A hydrochloride	Adrenoceptor		Agonist	beta	Mixed beta adrenoceptor agonist/antagonist	183.398	1.54766		209.012	1.37689		2	0.889656	0.971114	1.5937
LOPAC Plate_10	E	12	n/a (no compound empty)	n/a (no compound empty)						487.772	1.63671		443.244	0.96903		3	0.59206	1.02608	1.59512
LOPAC Plate_15	E	3	S143	(±)-6-Chloro-PB hydrobromide	Dopamine		Agonist	D1	D1 dopamine receptor agonist	312.527	1.72829		477.629	1.64467		3	0.951616	1.07789	1.60341
LOPAC Plate_09	C	9	O0257	Olvanil	Neurotransmission		Agonist	Vanilloid receptor	Vanilloid receptor agonist	524.203	1.6737		342.057	0.813483		3	0.486039	1.04357	1.60382
LOPAC Plate_07	C	12	n/a (no compound empty)	n/a (no compound empty)						300.707	1.65578		226.252	0.953372		2	0.575784	1.02624	1.61344
LOPAC Plate_02	D	7	A129	Amoxapine	Adrenoceptor		Inhibitor	Uptake	Tricyclic antidepressant; inhibits neuronal uptake of norepinephrine	218.787	1.27317		159.015	0.629816	Pipette damage	Batch 1	0.494681	0.786271	1.61926
LOPAC Plate_03	G	12	n/a (no compound empty)	n/a (no compound empty)						199.029	1.74148		273.304	1.03356		2	0.593493	1.07229	1.62408
LOPAC Plate_04	C	12	n/a (no compound empty)	n/a (no compound empty)						346.585	1.67138		326.498	0.936331		2	0.560216	1.02624	1.62863
LOPAC Plate_02	F	12	n/a (no compound empty)	n/a (no compound empty)						296.603	1.726	Edge effect	263.897	1.04523	Edge effect	Batch 1	0.605575	1.05892	1.62996
LOPAC Plate_07	G	12	n/a (no compound empty)	n/a (no compound empty)						317.568	1.74863		226.252	0.953372		2	0.545211	1.07229	1.63074
LOPAC Plate_15	B	8	T4264	Tetrahydrozoline hydrochloride	Adrenoceptor		Agonist	alpha	alpha-Adrenoceptor agonist; imidazoline binding site ligand; vasoconstrictor	285.01	1.57612		273.212	0.940781		3	0.596897	0.963558	1.63573
LOPAC Plate_14	F	9	S5013	Albuterol hemisulfate	Adrenoceptor		Agonist	beta2	beta Adrenoceptor agonist	339.796	1.61905		539.676	1.59763		3	0.986773	0.985829	1.64232
LOPAC Plate_16	A	4	T9262	Tamoxifen citrate	Phosphorylation	Enzyme	Inhibitor	PKC	Anti-estrogen; relatively selective protein kinase C inhibitor	312.527	1.74723		292.868	1.09361		3	0.625907	1.06219	1.64493
LOPAC Plate_11	H	12	n/a (no compound empty)	n/a (no compound empty)						601.01	1.62148		461.703	1.02428		3	0.631698	0.983515	1.64866
LOPAC Plate_01	D	12	n/a (no compound empty)	n/a (no compound empty)						343.215	1.6614	Edge effect	197.722	1.04179		Batch 1	0.627057	1.0042	1.65445
LOPAC Plate_08	B	12	n/a (no compound empty)	n/a (no compound empty)						384.664	1.60199		337.964	0.864868		3	0.539871	0.968028	1.6549
LOPAC Plate_10	D	12	n/a (no compound empty)	n/a (no compound empty)						520.155	1.74537		479.675	1.04868		3	0.600834	1.05198	1.65913
LOPAC Plate_08	D	12	n/a (no compound empty)	n/a (no compound empty)						424.686	1.76867		426.902	1.09246		3	0.617676	1.05198	1.68128
LOPAC Plate_15	A	3	S008	1-(2-Methoxyphenyl)piperazine hydrochloride	Serotonin		Agonist	5-HT1 > 5-HT2	Selective 5-HT1 serotonin receptor agonist	328.252	1.81525		249.626	0.859562		3	0.473522	1.07132	1.69441
LOPAC Plate_08	F	12	n/a (no compound empty)	n/a (no compound empty)						411.345	1.71311		426.902	1.09246		3	0.637709	1.00728	1.70073
LOPAC Plate_09	D	12	n/a (no compound empty)	n/a (no compound empty)						560.634	1.79002		406.823	0.967511		3	0.540503	1.05198	1.70157
LOPAC Plate_11	G	12	n/a (no compound empty)	n/a (no compound empty)						632.852	1.70738		473.644	1.05077		3	0.61543	1.00204	1.7039
LOPAC Plate_10	F	12	n/a (no compound empty)	n/a (no compound empty)						512.059	1.7182		487.771	1.06638		3	0.620634	1.00728	1.70579
LOPAC Plate_01	C	12	n/a (no compound empty)	n/a (no compound empty)						361.868	1.75169	Edge effect	220.105	1.15973		Batch 1	0.662063	1.02624	1.7069
LOPAC Plate_06	G	12	n/a (no compound empty)	n/a (no compound empty)						545.227	1.83213		390.393	1.18		2	0.644059	1.07229	1.70861
LOPAC Plate_05	B	12	n/a (no compound empty)	n/a (no compound empty)						217.209	1.83299		150.611	0.992169		2	0.541286	1.07183	1.71015
LOPAC Plate_08	C	12	n/a (no compound empty)	n/a (no compound empty)						389.111	1.62051		364.646	0.933147		3	0.575835	0.944317	1.71607
LOPAC Plate_03	H	12	n/a (no compound empty)	n/a (no compound empty)						234.523	2.05205		273.304	1.03356		2	0.503671	1.1957	1.71619
LOPAC Plate_11	C	12	n/a (no compound empty)	n/a (no compound empty)						601.01	1.62148		409.961	0.909494		3	0.560904	0.944317	1.71709
LOPAC Plate_03	C	12	n/a (no compound empty)	n/a (no compound empty)						202.579	1.77254		266.205	1.00671		2	0.567949	1.02624	1.72721
LOPAC Plate_04	A	9	C7632	Cantharidin	Phosphorylation	Enzyme	Inhibitor	PP2A	Protein phosphatase 2A inhibitor	405.789	1.95688		818.624	2.34765		2	1.19969	1.129	1.73328
LOPAC Plate_05	C	12	n/a (no compound empty)	n/a (no compound empty)						211.061	1.78111		150.611	0.992169		2	0.557051	1.02624	1.73556
LOPAC Plate_05	A	12	n/a (no compound empty)	n/a (no compound empty)						241.798	2.04049		159.832	1.05291		2	0.51601	1.17356	1.73873
LOPAC Plate_07	E	12	n/a (no compound empty)	n/a (no compound empty)						326	1.79505		234.683	0.988899		2	0.550902	1.03135	1.74049
LOPAC Plate_15	A	8	T4182	Tyrphostin AG 1478	Phosphorylation	Enzyme	Inhibitor	EGFR	Selective inhibitor of epidermal growth factor receptor (EGFR) protein	332.183	1.83699		253.557	0.873099		3	0.475288	1.05534	1.74067
LOPAC Plate_08	E	2	G110	Guanabenz acetate	Adrenoceptor		Agonist	alpha2	Centrally acting alpha2 adrenoceptor agonist; antihypertensive	440.227	1.83339		453.584	1.16074		3	0.633113	1.04844	1.74868
LOPAC Plate_13	H	3	P8139	Phorbol 12-myristate 13-acetate	Phosphorylation	Enzyme	Activator	PKC	Activates protein kinase C in vivo and in vitro; strong NO promoter; promotes expression of iNOS in cultured hepatocytes;T lymphocyte activator	355.77	1.61611		430.455	1.20664		3	0.746632	0.921625	1.75354
LOPAC Plate_02	G	12	n/a (no compound empty)	n/a (no compound empty)						323.669	1.88351	Edge effect	287.581	1.13903	Edge effect	Batch 1	0.604737	1.07229	1.75653
LOPAC Plate_02	H	3	A8676	Alprenolol hydrochloride	Adrenoceptor		Antagonist	beta	beta Adrenoceptor antagonist	350.735	2.04102	Edge effect	375.546	1.48744		Batch 1	0.728772	1.1579	1.76268
LOPAC Plate_08	G	12	n/a (no compound empty)	n/a (no compound empty)						424.686	1.76867		369.093	0.944527		3	0.534033	1.00204	1.76506
LOPAC Plate_03	D	12	n/a (no compound empty)	n/a (no compound empty)						202.579	1.77254		220.063	0.832215		2	0.469505	1.0042	1.76512
LOPAC Plate_08	E	4	H1877	4-Imidazolemethanol hydrochloride	Histamine	Enzyme	Inhibitor	Histinol Dehydrogenase	Histonol dehydrogenase Inhibitor	386.864	1.61115		342.411	0.876248		3	0.543864	0.912084	1.76645
LOPAC Plate_02	A	12	n/a (no compound empty)	n/a (no compound empty)						357.502	2.08039	Edge effect	280.814	1.11223		Batch 1	0.534624	1.17356	1.77272
LOPAC Plate_08	H	12	n/a (no compound empty)	n/a (no compound empty)						420.239	1.75015		333.517	0.853488		3	0.487666	0.983515	1.77948
LOPAC Plate_08	A	12	n/a (no compound empty)	n/a (no compound empty)						438.027	1.82423		431.349	1.10384		3	0.605102	1.01682	1.79405
LOPAC Plate_10	B	12	n/a (no compound empty)	n/a (no compound empty)						520.155	1.74537		439.196	0.960181		3	0.55013	0.968028	1.80302
LOPAC Plate_10	G	12	n/a (no compound empty)	n/a (no compound empty)						540.395	1.81328		508.011	1.11062		3	0.612494	1.00204	1.80959
LOPAC Plate_03	F	12	n/a (no compound empty)	n/a (no compound empty)						220.326	1.92782		259.106	0.979866		2	0.508276	1.05892	1.82055
LOPAC Plate_16	H	5	PZ0115	CP-31398 dihydrochloride hydrate	Apoptosis and Cell Cycle			p53	CP-31398 dihyrochloride hydrate is a p53 stabilizer; apoptosis inducer	320.39	1.79119		340.041	1.26976		3	0.708891	0.982953	1.82225
LOPAC Plate_05	D	12	n/a (no compound empty)	n/a (no compound empty)						220.283	1.85892		147.538	0.971921		2	0.52284	1.0042	1.85115
LOPAC Plate_13	F	12	n/a (no compound empty)	n/a (no compound empty)						410.805	1.86611		351.833	0.986246		3	0.528504	1.00728	1.85262
LOPAC Plate_13	E	12	n/a (no compound empty)	n/a (no compound empty)						422.598	1.91968		375.42	1.05236		3	0.548197	1.02608	1.8709
LOPAC Plate_10	H	12	n/a (no compound empty)	n/a (no compound empty)						548.49	1.84045		524.202	1.14602		3	0.622687	0.983515	1.8713
LOPAC Plate_03	A	9	C0330	Ciprofibrate	Transcription		Ligand	PPAR-alpha	Peroxizome proliferator;specific ligand for the nuclear peroxisome proliferator-activated receptor alpha (PPARalpha)	241.622	2.11416		220.063	0.832215		2	0.393638	1.129	1.87259
LOPAC Plate_10	F	10	M6545	Mitoxantrone	DNA Metabolism		Inhibitor		DNA synthesis inhibitor	568.73	1.90836		637.543	1.39381		3	0.730371	1.01319	1.88352
LOPAC Plate_10	C	12	n/a (no compound empty)	n/a (no compound empty)						532.299	1.78612		394.669	0.862835		3	0.483078	0.944317	1.89144
LOPAC Plate_02	E	12	n/a (no compound empty)	n/a (no compound empty)						337.202	1.96226	Edge effect	267.281	1.05863		Batch 1	0.539492	1.03135	1.90262
LOPAC Plate_05	E	12	n/a (no compound empty)	n/a (no compound empty)						232.577	1.96268		147.538	0.971921		2	0.495201	1.03135	1.90302
LOPAC Plate_05	H	12	n/a (no compound empty)	n/a (no compound empty)						272.536	2.29988		165.98	1.09341		2	0.475421	1.1957	1.92346
LOPAC Plate_13	D	12	n/a (no compound empty)	n/a (no compound empty)						446.185	2.02682		387.213	1.08542		3	0.535528	1.05198	1.92668
LOPAC Plate_13	G	12	n/a (no compound empty)	n/a (no compound empty)						426.529	1.93754		359.696	1.00829		3	0.520395	1.00204	1.93359
LOPAC Plate_03	E	12	n/a (no compound empty)	n/a (no compound empty)						230.974	2.02099		230.711	0.872483		2	0.431711	1.03135	1.95956
LOPAC Plate_14	H	11	S8502	(-)-Scopolamine methyl bromide	Cholinergic		Antagonist	Muscarinic	Competitive muscarinic acetylcholine receptor antagonist	483.709	2.30476		431.741	1.27811		3	0.55455	1.16212	1.98324
LOPAC Plate_03	A	12	n/a (no compound empty)	n/a (no compound empty)						266.468	2.33156		298.15	1.12752		2	0.483589	1.17356	1.98674
LOPAC Plate_11	A	12	n/a (no compound empty)	n/a (no compound empty)						756.238	2.04027		465.683	1.03311		3	0.506362	1.01682	2.00651
LOPAC Plate_05	F	12	n/a (no compound empty)	n/a (no compound empty)						254.093	2.14425		150.611	0.992169		2	0.462712	1.05892	2.02493
LOPAC Plate_14	A	2	R0758	Ritodrine hydrochloride	Adrenoceptor		Agonist	beta2	beta2-Adrenoceptor agonist; relaxes uterine muscle contractions	483.709	2.30476		511.693	1.51479		3	0.657245	1.13449	2.03154
LOPAC Plate_03	A	7	B102	Bupropion hydrochloride	Dopamine		Blocker	Reuptake	Selective dopamine reuptake inhibitor; antidepressant	216.776	1.89676		252.007	0.95302		2	0.502445	0.929653	2.04029
LOPAC Plate_02	C	7	PZ0178	PHA 767491 hydrochloride	kinase phosphotase	Enzyme	Inhibitor	cdc7/cdk9	PHA-767491 is a potent and selective ATP-competitive dual inhibitor cdc7/cdk9	327.052	1.9032		216.531	0.857621	Pipette damage	Batch 1	0.450621	0.930369	2.04564
LOPAC Plate_09	C	12	n/a (no compound empty)	n/a (no compound empty)						605.161	1.93219		414.919	0.986765		3	0.510698	0.944317	2.04612
LOPAC Plate_08	E	12	n/a (no compound empty)	n/a (no compound empty)						504.73	2.10202		435.796	1.11522		3	0.530548	1.02608	2.04861
LOPAC Plate_02	B	12	n/a (no compound empty)	n/a (no compound empty)						377.802	2.19852		250.364	0.991625		Batch 1	0.451041	1.07183	2.05119
LOPAC Plate_02	C	12	n/a (no compound empty)	n/a (no compound empty)						364.269	2.11977	Edge effect	219.915	0.871022		Batch 1	0.410904	1.02624	2.06556
LOPAC Plate_05	G	12	n/a (no compound empty)	n/a (no compound empty)						263.314	2.22206		141.39	0.931424		2	0.419171	1.07229	2.07226
LOPAC Plate_15	A	9	B9311	BIX 01294 trihydrochloride hydrate	Gene Regulation	Enzyme	Inhibitor	HMT	Selective histone methyl transferase inhibitor.	430.461	2.38047		485.491	1.67175		3	0.702275	1.14831	2.07302
LOPAC Plate_02	H	12	n/a (no compound empty)	n/a (no compound empty)						431.935	2.51354	Edge effect	219.915	0.871022	Edge effect	Batch 1	0.346532	1.1957	2.10215
LOPAC Plate_13	B	12	n/a (no compound empty)	n/a (no compound empty)						450.116	2.04468		395.076	1.10746		3	0.54163	0.968028	2.11221
LOPAC Plate_13	H	12	n/a (no compound empty)	n/a (no compound empty)						461.909	2.09825		340.04	0.953187		3	0.454277	0.983515	2.13342
LOPAC Plate_04	H	9	C8088	Cantharidic Acid	Phosphorylation	Enzyme	Inhibitor	PP1 / PP2A	Protein phosphatase 1 (PP1) and 2A (PP2A) inhibitor	535.296	2.58141		474.506	1.36079		2	0.527149	1.2054	2.14154
LOPAC Plate_02	D	12	n/a (no compound empty)	n/a (no compound empty)						371.035	2.15915		230.064	0.911223		Batch 1	0.422029	1.0042	2.15011
LOPAC Plate_10	A	12	n/a (no compound empty)	n/a (no compound empty)						661.832	2.22076		382.526	0.836286		3	0.376576	1.01682	2.18402
LOPAC Plate_02	B	3	SML0075	OBAA	Phospholipases	Enzyme	Inhibitor		OBAA is a potent inhibitor of phospholipases.	394.718	2.29696		426.296	1.68844		Batch 1	0.735075	1.04928	2.18909
LOPAC Plate_01	B	12	n/a (no compound empty)	n/a (no compound empty)						484.978	2.34763	Edge effect	205.183	1.08111		Batch 1	0.460509	1.07183	2.1903
LOPAC Plate_09	A	12	n/a (no compound empty)	n/a (no compound empty)						706.359	2.2553		386.584	0.919378		3	0.407653	1.01682	2.21798
LOPAC Plate_07	E	9	F114	cis-(Z)-Flupenthixol dihydrochloride	Dopamine		Antagonist		Dopamine receptor antagonist; antipsychotic	368.155	2.02717		276.837	1.16653		2	0.575448	0.910595	2.22621
LOPAC Plate_15	B	12	n/a (no compound empty)	n/a (no compound empty)						399.012	2.20656		261.419	0.900171		3	0.407953	0.968028	2.27944
LOPAC Plate_16	B	4	T9652	Terfenadine	Histamine		Antagonist	H1	Non-sedating H1 histamine receptor antagonist	442.254	2.47249		430.456	1.60738		3	0.650106	1.07996	2.28942
LOPAC Plate_15	D	12	n/a (no compound empty)	n/a (no compound empty)						438.323	2.42395		320.385	1.10322		3	0.455132	1.05198	2.30418
LOPAC Plate_13	C	12	n/a (no compound empty)	n/a (no compound empty)						485.496	2.2054		320.385	0.89809		3	0.407224	0.944317	2.33544
LOPAC Plate_09	B	12	n/a (no compound empty)	n/a (no compound empty)						714.454	2.28114		390.632	0.929004		3	0.407254	0.968028	2.35649
LOPAC Plate_07	G	5	F1016	Fenoterol hydrobromide	Adrenoceptor		Agonist	beta2	Beta2-adrenoceptor agonist; bronchodilator	469.327	2.58425		445.457	1.87706		2	0.726344	1.08632	2.37892
LOPAC Plate_14	A	12	n/a (no compound empty)	n/a (no compound empty)						507.695	2.41905		371.777	1.10059		3	0.454969	1.01682	2.37903
LOPAC Plate_13	A	12	n/a (no compound empty)	n/a (no compound empty)						540.531	2.4554		324.316	0.909109		3	0.370249	1.01682	2.41477
LOPAC Plate_15	C	12	n/a (no compound empty)	n/a (no compound empty)						418.667	2.31525		281.074	0.967853		3	0.418034	0.944317	2.45177
LOPAC Plate_02	B	5	A9512	L(-)-Norepinephrine bitartrate	Adrenoceptor		Agonist	alpha, beta1	Adrenergic neurotransmitter; vasoconstrictor	438.701	2.55291		412.763	1.63484		Batch 1	0.640383	1.03125	2.47556
LOPAC Plate_15	A	12	n/a (no compound empty)	n/a (no compound empty)						457.978	2.53265		265.35	0.913708		3	0.360772	1.01682	2.49074
LOPAC Plate_14	C	12	n/a (no compound empty)	n/a (no compound empty)						495.702	2.36191		323.806	0.95858		3	0.40585	0.944317	2.50118
LOPAC Plate_16	D	12	n/a (no compound empty)	n/a (no compound empty)						473.703	2.64831		288.936	1.07893		3	0.407402	1.05198	2.51745
LOPAC Plate_07	E	3	E4642	(±)-Epinephrine hydrochloride	Adrenoceptor		Agonist		Adrenoceptor agonist	452.465	2.49141		356.932	1.50403		2	0.603687	0.988412	2.52062
LOPAC Plate_15	E	12	n/a (no compound empty)	n/a (no compound empty)						469.772	2.59786		308.592	1.06261		3	0.409032	1.02608	2.53184
LOPAC Plate_14	B	12	n/a (no compound empty)	n/a (no compound empty)						515.69	2.45715		323.806	0.95858		3	0.39012	0.968028	2.5383
LOPAC Plate_14	E	12	n/a (no compound empty)	n/a (no compound empty)						547.671	2.60953		311.813	0.923077		3	0.353734	1.02608	2.54321
LOPAC Plate_07	C	3	E4375	(-)-Epinephrine bitartrate	Adrenoceptor		Agonist		Endogenous hormone and neurotransmitter	481.973	2.65389		356.932	1.50403		2	0.566727	1.01332	2.619
LOPAC Plate_15	F	12	n/a (no compound empty)	n/a (no compound empty)						477.634	2.64134		277.143	0.954317		3	0.3613	1.00728	2.62225
LOPAC Plate_14	F	12	n/a (no compound empty)	n/a (no compound empty)						555.666	2.64762		355.786	1.05326		3	0.397812	1.00728	2.62849
LOPAC Plate_14	D	12	n/a (no compound empty)	n/a (no compound empty)						583.649	2.78096		359.784	1.06509		3	0.382994	1.05198	2.64355
LOPAC Plate_15	A	7	T2528	Terbutaline hemisulfate	Adrenoceptor		Agonist	beta	beta-Adrenoceptor agonist; bronchodilator	556.256	3.07613		548.389	1.88833		3	0.613866	1.15832	2.65567
LOPAC Plate_07	C	9	F9677	Felodipine	Ca2+ Channel		Blocker	L-type	L-type calcium channel blocker	481.973	2.65389		340.07	1.43298		2	0.539954	0.987921	2.68634
LOPAC Plate_15	H	12	n/a (no compound empty)	n/a (no compound empty)						481.565	2.66308		320.385	1.10322		3	0.414264	0.983515	2.70772
LOPAC Plate_16	G	12	n/a (no compound empty)	n/a (no compound empty)						485.496	2.71424		273.212	1.02021		3	0.375873	1.00204	2.70871
LOPAC Plate_16	F	12	n/a (no compound empty)	n/a (no compound empty)						493.358	2.75819		229.97	0.858738		3	0.311341	1.00728	2.73826
LOPAC Plate_05	G	11	D5886	N-Methyldopamine hydrochloride	Dopamine		Agonist		Dopamine receptor agonist	373.968	3.15584		390.36	2.57154		2	0.81485	1.14025	2.76767
LOPAC Plate_14	G	12	n/a (no compound empty)	n/a (no compound empty)						587.647	2.8		347.791	1.02959		3	0.367709	1.00204	2.7943
LOPAC Plate_16	E	12	n/a (no compound empty)	n/a (no compound empty)						516.945	2.89006		281.074	1.04957		3	0.363165	1.02608	2.81661
LOPAC Plate_16	A	12	n/a (no compound empty)	n/a (no compound empty)						516.945	2.89006		288.936	1.07893		3	0.373323	1.01682	2.84224
LOPAC Plate_07	A	8	F6886	Forskolin	Cyclic Nucleotides	Enzyme	Activator	Adenylate cyclase	Activates adenylate cyclase; antihypertensive and vasodilator; isolated from Coleus forskohlii	566.283	3.11813		614.078	2.58758		2	0.829852	1.09661	2.84341
LOPAC Plate_14	H	12	n/a (no compound empty)	n/a (no compound empty)						587.647	2.8		307.815	0.911243		3	0.325444	0.983515	2.84694
LOPAC Plate_05	E	6	D0676	Dobutamine hydrochloride	Adrenoceptor		Agonist	beta1	beta1 Adrenoceptor agonist	303.272	2.55926		362.697	2.38931		2	0.933592	0.893295	2.86497
LOPAC Plate_16	C	12	n/a (no compound empty)	n/a (no compound empty)						489.427	2.73622		281.074	1.04957		3	0.383584	0.944317	2.89756
LOPAC Plate_05	D	10	D5290	(-)-alpha-Methylnorepinephrine	Adrenoceptor		Agonist		Active enantiomer; adrenoceptor agonist; vasoconstrictor; antihypertensive	352.452	2.97428		381.139	2.5108		2	0.84417	1.02453	2.90307
LOPAC Plate_16	H	12	n/a (no compound empty)	n/a (no compound empty)						524.807	2.93401		241.763	0.902776		3	0.307693	0.983515	2.98319
LOPAC Plate_07	B	9	F9552	Formoterol	Adrenoceptor		Agonist	beta2	beta2-Adrenoceptor agonist	591.576	3.2574		420.164	1.77048		2	0.543525	1.07663	3.02555
LOPAC Plate_16	B	12	n/a (no compound empty)	n/a (no compound empty)						564.118	3.15379		257.488	0.961493		3	0.304869	0.968028	3.25795
LOPAC Plate_15	G	12	n/a (no compound empty)	n/a (no compound empty)						591.636	3.27178		288.936	0.994926		3	0.304093	1.00204	3.26511
