# Supplementary material for: An in vivo reporter for tracking lipid droplet dynamics in transparent zebrafish
Source: eLife. 2021 Jun 11;10:e64744. doi: 10.7554/eLife.64744 (PMC8195600; doi:10.7554/eLife.64744)
Supplement: Figure 5—source data 2. [file elife-64744-fig5-data2.xlsx]

## Sheet: Glycerol Release
DMSO	ATGLi
145.765	62.2055
137.938	63.1735
154.706	57.86
247.074	74.1735
190.723	55.1887

## Sheet: Fold Change
DMSO	Atglistatin
0.831992	0.355054
0.787316	0.36058
0.883025	0.330251
1.41024	0.423364
1.0886	0.315004

## Sheet: Log2 Fold Change
DMSO	Atglistatin
-0.265358	-1.49389
-0.344986	-1.47161
-0.179474	-1.59836
0.495942	-1.24003
0.122473	-1.66656

## Sheet: Log2(FC) stats
Unpaired t test	P value
ATGLi vs. DMSO	<0.0001
Mean	175.2	62.52
Std. Deviation	44.95	7.277
Std. Error of Mean	20.1	3.254
