# Supplementary material for: An in vivo reporter for tracking lipid droplet dynamics in transparent zebrafish
Source: eLife. 2021 Jun 11;10:e64744. doi: 10.7554/eLife.64744 (PMC8195600; doi:10.7554/eLife.64744)
Supplement: Figure 5—source data 3. [file elife-64744-fig5-data3.xlsx]

## Sheet: Area (mm2)
Fish Number	DMSO	Atglistatin	Auranofin	JS-K
1	0.061486	0.080721	0.057625	0.054569
2	0.067759	0.05508	0.095637	0.085019
3	0.031088	0.081229	0.048033	0.033872
4	0.0283	0.150753	0.034338	0.134735
5	0.043484	0.132538	0.067591	0.04197
6	0.044187	0.361538	0.410048	0.033898
7	0.073237	0.489488	0.22014	0.390145
8	0.020149	0.785131	0.409608	0.288192
9	0.036041	1.21667	0.369763	0.335338
10	0.020581	0.368674	0.225094	0.465187
11	0.037848	0.451746	0.36138	0.368666
12	0.026808	0.702757	0.296234	0.474759
13	0.213573	0.698273	0.337612	0.799536
14	0.287572	0.789574	0.362008	0.712071
15	0.286567	0.770701	0.127338	0.100552
16	0.251373	0.691179	0.100453	0.549443
17	0.572605	0.767705	0.114488	0.398735
18	0.276114	0.268246	0.214965	0.102556
19	0.472178	0.636896	0.0894141	0.0128714
20	0.379077	0.252017	0.138734	0.152346
21	0.132949	0.350508	0.333044	0.227093
22	0.19761	0.530192	0.407135	0.277053
23	0.831039	0.248464	0.262332	0.119346
24	0.230975	0.464713	0.088932	0.262806
25	0.248314	0.497085	0.395527	0.0926933
26	0.150355	0.431277	0.121586	0.462278
27	0.0627071	0.702903	0.261518	0.360458
28	0.0520758	0.630653	0.178471	0.311686
29	0.107264	0.483819	0.171185	0.368138
30	0.0638749	0.535259	0.228805	0.389862
31	0.127505	0.737411	0.457547	0.309704
32	0.0348447	0.634984	0.354133	0.62331
33	0.124051	0.472955	0.435493	0.461727
34	0.200245	0.965043	0.411537	0.547698
35	0.039379	0.477226	0.319573	0.891497
36	0.11748	1.14447	0.492885	0.614662
37	0.30025	0.626552	0.544566	0.64519
38	0.406694	0.729953	0.6197	0.442302
39	0.372776	0.592621	0.345384	0.622739
40	0.373744	0.55476	0.502225	0.429872
41	0.908061	0.64566	0.806418	0.759673
42	0.423295	0.899283	0.424285	0.338808
43	0.400337	1.2966		0.402573
44	0.500416	0.933213		0.615448
45	0.268065
46	0.771436
47	0.453561

## Sheet: Area statistics
Dunn's multiple comparisons test	Adjusted P Value
DMSO vs. Atglistatin	<0.0001
DMSO vs. Auranofin	0.4132
DMSO vs. JS-K	0.0152
	DMSO	Atglistatin	Auranofin	JS-K
Mean	0.2368	0.5758	0.2915	0.3662
Std. Deviation	0.2211	0.2897	0.173	0.2285
Std. Error of Mean	0.03226	0.04368	0.0267	0.03445

## Sheet: Standard Length (mm)
Fish Number	DMSO	Atglistatin	Auranofin	JS-K
1	7.17271	8.07966	9.29148	7.9961
2	8.53125	7.85225	8.36745	8.41701
3	7.68141	8.43745	8.03667	7.77253
4	7.22491	8.14488	7.32674	8.37148
5	8.69506	7.95676	7.77958	8.2728
6	8.67483	8.19069	10.8975	7.65542
7	7.89275	9.08321	9.33461	9.35544
8	8.42918	10.2761	9.73457	9.75396
9	8.26328	10.2334	10.6335	8.56942
10	8.4901	9.14142	9.17421	9.82508
11	8.59281	10.0812	9.54988	9.43692
12	8.48938	10.7776	10.4787	8.46765
13	8.52842	9.6192	10.4497	10.8153
14	10.1328	10.5089	9.44761	9.65128
15	8.60122	10.2553	8.23827	7.80312
16	9.31406	9.43228	8.77823	10.0862
17	10.1822	10.8282	8.00008	9.25408
18	8.90731	8.30078	8.84788	7.33999
19	9.37564	9.11042	8.57659	7.80972
20	10.4106	7.99879	9.19023	7.94346
21	8.61061	8.61094	9.5793	8.56708
22	10.5921	8.64235	9.84979	9.0244
23	10.0726	8.34507	9.35864	9.03049
24	9.80455	8.59176	8.64146	9.1564
25	9.388	8.6303	8.85308	8.78479
26	8.66397	8.62096	8.3606	9.34615
27	8.55041	9.05463	9.28029	9.20974
28	8.56062	9.11128	8.99198	9.13164
29	7.79876	8.84942	9.24167	9.26624
30	7.81949	9.34774	8.18904	8.93245
31	8.17117	9.14866	10.2134	8.99123
32	8.45169	8.76375	8.8555	9.93661
33	8.33186	9.19892	8.78324	8.92631
34	8.1638	9.35504	9.41631	9.45101
35	9.21177	9.93777	9.20384	9.93777
36	9.12074	9.26429	9.38701	8.88501
37	8.25181	9.22426	9.53128	9.49184
38	10.2437	8.90673	9.42734	8.99803
39	9.0178	8.73395	8.65205	9.57141
40	9.31486	9.08993	9.87664	9.30416
41	9.75306	8.42006	9.69393	9.14176
42	9.43868	9.03027	8.90752	9.49933
43	8.88649	9.96171		9.06691
44	8.72881	9.28575		9.54568
45	8.91712
46	10.1471
47	8.94628

## Sheet: Standard length statistics
Dunnett's multiple comparisons test	Adjusted P Value
DMSO vs. Atglistatin	0.3289
DMSO vs. Auranofin	0.1918
DMSO vs. JS-K	0.755
	DMSO	Atglistatin	Auranofin	JS-K
Mean	8.863	9.101	9.153	8.995
Std. Deviation	0.8128	0.7666	0.7749	0.7319
Std. Error of Mean	0.1186	0.1156	0.1196	0.1103

## Sheet: Area ov. Std length
Fish Number	DMSO	Atglistatin	Auranofin	JS-K
1	0.0085722	0.0099906	0.0062019	0.0068245
2	0.0079424	0.0070146	0.0114296	0.0101009
3	0.0040472	0.0096272	0.0059767	0.0043579
4	0.003917	0.0185089	0.0046867	0.0160945
5	0.005001	0.0166573	0.0086883	0.0050733
6	0.0050937	0.0441402	0.0376279	0.004428
7	0.009279	0.0538893	0.0235832	0.0417024
8	0.0023904	0.0764033	0.0420776	0.0295461
9	0.0043616	0.118892	0.0347734	0.039132
10	0.0024241	0.0403301	0.0245355	0.0473469
11	0.0044046	0.0448108	0.0378414	0.0390664
12	0.0031578	0.0652054	0.0282702	0.0560673
13	0.0250425	0.0725916	0.0323082	0.0739261
14	0.0283804	0.075134	0.0383174	0.07378
15	0.033317	0.0751514	0.0154569	0.0128862
16	0.0269885	0.073278	0.0114434	0.0544748
17	0.0562357	0.0708989	0.0143108	0.0430875
18	0.0309986	0.0323158	0.0242957	0.0139722
19	0.0503622	0.0699085	0.0104254	0.0016481
20	0.0364126	0.0315069	0.0150959	0.0191787
21	0.0154402	0.040705	0.0347671	0.0265076
22	0.0186563	0.0613482	0.0413344	0.0307005
23	0.0825047	0.0297737	0.028031	0.0132159
24	0.0235579	0.0540883	0.0102913	0.0287019
25	0.0264501	0.0575976	0.0446767	0.0105516
26	0.017354	0.0500266	0.0145428	0.0494618
27	0.0073338	0.0776291	0.0281799	0.0391387
28	0.0060832	0.0692168	0.0198478	0.0341325
29	0.0137541	0.0546724	0.0185232	0.039729
30	0.0081687	0.0572607	0.0279404	0.0436456
31	0.0156042	0.0806032	0.0447989	0.0344451
32	0.0041228	0.0724558	0.0399902	0.0627286
33	0.0148887	0.0514141	0.0495823	0.0517265
34	0.0245284	0.103157	0.0437047	0.0579513
35	0.0042749	0.0480214	0.0347217	0.089708
36	0.0128806	0.123536	0.0525071	0.0691797
37	0.0363859	0.0679243	0.0571346	0.0679732
38	0.0397019	0.0819552	0.0657344	0.0491554
39	0.0413378	0.0678526	0.0399194	0.0650624
40	0.0401234	0.0610302	0.0508498	0.0462021
41	0.0931052	0.0766811	0.0831879	0.0830992
42	0.0448469	0.0995853	0.0476321	0.0356665
43	0.0450501	0.130158		0.0444002
44	0.0573293	0.100499		0.0644741
45	0.0300618
46	0.0760254
47	0.0506983

## Sheet: Area over std length statistics
Dunn's multiple comparisons test	Adjusted P Value
DMSO vs. Atglistatin	<0.0001
DMSO vs. Auranofin	0.4765
DMSO vs. JS-K	0.0113
	DMSO	Atglistatin	Auranofin	JS-K
Mean	0.0255	0.0619	0.03108	0.03932
Std. Deviation	0.0224	0.02898	0.01764	0.02314
Std. Error of Mean	0.003268	0.004369	0.002722	0.003489
